# Supplementary material for: Mapping Gene Associations in Human Mitochondria using Clinical Disease Phenotypes
Source: PLoS Comput Biol. 2009 Apr 24;5(4):e1000374. doi: 10.1371/journal.pcbi.1000374 (PMC2668170; doi:10.1371/journal.pcbi.1000374)
Supplement: Table S1 — 174 nuclear-encoded mitochondrial disease genes (0.09 MB XLS) [file pcbi.1000374.s004.xls]

## Sheet: TableS1
GENE SYMBOL	ENSEMBL	ENTREZ-ID	GENE ALIAS	MAP POSITION	SWISSPROT-ID	DESCRIPTION	SUBCELLULAR LOCATION	SUBCELLULAR-PMIDs	PROTEIN COMPLEX	OMIM GENE	OMIM DISEASE
AASS	ENSG00000008311	10157	LKR/SDH;LKRSDH;LORSDH	7q31.3	Q9UDR5	Alpha-aminoadipic semialdehyde synthase, mitochondrial precursor (LKR/SDH)	Mitochondria	10775527		605113	Hyperlysinemia-[238700];Saccharopinuria-[268700]
ABAT	ENSG00000183044	18	GABA-AT;GABAT;NPD009	16p13.2	P80404	4-aminobutyrate aminotransferase, mitochondrial precursor	Mitochondria;Mitochondrial-matrix	9923979		137150	Deficiency-of-GABA-transaminase-[137150];Susceptibility-for-autism-[209850]
ABCB7	ENSG00000131269	22	ABC7;ASAT;Atm1p;EST140535	Xq12-q13	O75027	ATP-binding cassette, sub-family B, member 7, mitochondrial precursor	Mitochondria;Mitochondrial-inner-membrane	10196363;9883897		300135	Sideroblastic-anemia-and-spinocerebellar-ataxia-(ASAT)-[301310]
ABCD1	ENSG00000101986	215	ABC42;ALD;ALDP;AMN	Xq28	P33897	Adrenoleukodystrophy protein (ALDP)	Mitochondria-related;Peroxisome	12509471		300371	Adrenoleukodystrophy-(ALD)-[300100]
ACADL	ENSG00000115361	33	ACAD4;LCAD	2q34-q35	P28330	Acyl-CoA dehydrogenase, long-chain specific, mitochondrial precursor	Mitochondria;Mitochondrial-matrix	7551821		609576	LCAD-deficiency-[201460]
ACADM	ENSG00000117054	34	ACAD1;MCAD;MCADH	1p31	P11310	Acyl-CoA dehydrogenase, medium-chain specific, mitochondrial precursor	Mitochondria;Mitochondrial-matrix	1731887		607008	MCAD-deficiency-[201450]
ACADS	ENSG00000122971	35	ACAD3;SCAD	12q22-qter	P16219	Acyl-CoA dehydrogenase, short-chain specific, mitochondrial precursor	Mitochondria;Mitochondrial-matrix	9582344		606885	SCAD-deficiency-[201470]
ACADSB	ENSG00000196177	36	2-MEBCAD;ACAD7;SBCAD	10q26.13	P45954	Acyl-CoA dehydrogenase, short/branched chain specific, mitochondrial precursor	Mitochondria;Mitochondrial-matrix	7698750		600301	2-alpha-methylbutyryl-CoA-dehydrogenase-deficiency-(SBCADD)-[610006]
ACADVL	ENSG00000072778	37	ACAD6;LCACD;VLCAD	17p13-p11	P49748	Acyl-CoA dehydrogenase, very-long-chain specific, mitochondrial precursor	Mitochondria;Mitochondrial-inner-membrane	7668252		609575	VLCAD-deficiency-[201475]
ACAT1	ENSG00000075239	38	ACAT;MAT;T2;THIL	11q22.3-q23.1	P24752	Acetyl-CoA acetyltransferase, mitochondrial precursor	Mitochondria	1979337		607809	Alpha-methylacetoacetic-aciduria-(MAT)-[203750]
ACSL4	ENSG00000068366	2182	ACS4;FACL4;LACS4;MRX63;MRX68	Xq22.3-q23	O60488	Long-chain-fatty-acid-CoA ligase 4	Microsome;Mitochondria;Mitochondrial-outer-membrane;Peroxisome	11889465		300157	Mental-retardation-X-linked-(MRX63)-[300387]
ACSL6	ENSG00000164398	23305	ACS2;FACL6;FLJ16173;KIAA0837;LACS2;LACS5	5q31	Q9UKU0	Long-chain-fatty-acid-CoA ligase 6	Microsome;Mitochondria;Mitochondrial-outer-membrane;Peroxisome	10548543		604443	Acute-myelogenous-leukemia-(AML)-with-eosinophilia;Acute-eosinophilic-leukemia-(AEL)-[604443]
AGXT	ENSG00000172482	189	AGT;AGT1;AGXT1;PH1;SPAT;SPT;TLH6	2q36-q37	P21549	Serine-pyruvate aminotransferase	Mitochondria;Mitochondrial-matrix;Peroxisome	1703535		604285	Primary-hyperoxaluria-type-I-(PH-I)-[259900]
ALAS2	ENSG00000158578	212	ANH1;ASB;XLSA	Xp11.21	P22557	5-aminolevulinic acid synthase, erythroid-specific, mitochondrial precursor	Mitochondria;Mitochondrial-matrix	10727444		301300	X-linked-sideroblastic-anemia-(XLSA)-[301300]
ALDH18A1	ENSG00000059573	5832	GSAS;MGC117316;P5CS;PYCS	10q24.3	P54886	Delta 1-pyrroline-5-carboxylate synthetase (P5CS)	Mitochondria;Mitochondrial-inner-membrane	10037775;15517380		138250	Delta-1-pyrroline-5-carboxylate-synthetase-deficiency-(P5CS)-[138250]
ALDH2	ENSG00000111275	217	ALDH-E2;ALDHI;ALDM;MGC1806	12q24.2	P05091	Aldehyde dehydrogenase, mitochondrial precursor	Mitochondria;Mitochondrial-matrix	7910607		100650	Acute-alcohol-intolerance-(AAI)-[100650];Uterine-leiomyoma-(UL)-[150699];Involutional-osteoporosis-[166710]
ALDH4A1	ENSG00000159423	8659	ALDH4;P5CD;P5CDh;P5CDhL;P5CDhS	1p36	P30038	Delta-1-pyrroline-5-carboxylate dehydrogenase, mitochondrial precursor	Mitochondria;Mitochondrial-matrix	8621661		606811	Hyperprolinemia-type-II-(HP-II)-[239510]
ALDH5A1	ENSG00000112294	7915	SSADH;SSDH	6p22.2-p22.3	P51649	Succinate semialdehyde dehydrogenase, mitochondrial precursor	Mitochondria	12527414		610045	Succinic-semialdehyde-dehydrogenase-deficiency-(SSADH)-[271980]
ALDH6A1	ENSG00000119711	4329	MGC40271;MMSADHA;MMSDH	14q24.3	Q02252	Methylmalonate-semialdehyde dehydrogenase [acylating], mitochondrial precursor	Mitochondria	1527093		603178	Methylmalonate-semialdehyde-dehydrogenase-deficiency-(MMSDHD)-[603178]
AMACR	ENSG00000082196	23600	RACE	5p13	Q9UHK6	Alpha-methylacyl-CoA racemase	Mitochondria;Peroxisome	7649182;10770938;11060359		604489	Prostate-cancer-[176807];Alpha-methylacyl-CoA-racemase-deficiency-(AMACRD)-[604489]
AMT	ENSG00000145020	275	GCE;GCST;NKH	3p21.2-p21.1	P48728	Aminomethyltransferase, mitochondrial precursor	Mitochondria	8188235	Glycine-cleavage-system-complex-(GCC)	238310	Glycine-encephalopathy-(GCE)-[605899]
ATP7B	ENSG00000123191	540	PWD;WC1;WD;WND	13q14.3	P35670	Copper-transporting ATPase 2	Cytoplasm;Golgi-apparatus;Membrane;Mitochondria	9600907		606882	Wilson-disease-(WD)-[277900]
ATPAF2	ENSG00000171953	91647	ATP12;ATP12p;LP3663;MGC29736	17p11.2	Q8N5M1	ATP synthase mitochondrial F1 complex assembly factor 2	Mitochondria	14757859	Respiratory-chain-complex-V-(RCCV);RCCV-assembly	608918	ATPAF2-deficiency-[604273]
AUH	ENSG00000148090	549	-	9q22.31	Q13825	Methylglutaconyl-CoA hydratase, mitochondrial precursor	Mitochondria	12434311		600529	3-methylglutaconic-aciduria-type-I-(MGAI)-[250950]
BAX	ENSG00000087088	581	Bax zeta	19q13.3-q13.4	Q07812	Apoptosis regulator BAX, membrane isoform alpha	Cytoplasm;Membrane;Mitochondria;Mitochondrial-outer-membrane;Nucleus	11402069		600040	Colorectal-cancer-(CRC)-[114500];Gastric-cancer-[137215];Acute-lymphoblastic-leukemia-(ALL)-[600040]
BCKDHA	ENSG00000142046	593	FLJ45695;MSU;MSUD1	19q13.1-q13.2	P12694	2-oxoisovalerate dehydrogenase alpha subunit, mitochondrial precursor	Mitochondria;Mitochondrial-matrix	1889817	Branched-chain-alpha-keto-acid-dehydrogenase-complex-(BCKDH)	608348	Maple-syrup-urine-disease-(MSUD)-[248600]
BCKDHB	ENSG00000083123	594	E1B	6q13-q15	P21953	2-oxoisovalerate dehydrogenase beta subunit, mitochondrial precursor	Mitochondria;Mitochondrial-matrix	2365818	Branched-chain-alpha-keto-acid-dehydrogenase-complex-(BCKDH)	248611	Maple-syrup-urine-disease-(MSUD)-[248600]
BCL2	ENSG00000171791	596	Bcl-2	18q21.33|18q21.3	P10415	Apoptosis regulator Bcl-2	Mitochondria;Mitochondrial-outer-membrane	1453000		151430	Chronic-lymphocytic-leukemia-(CLL)-[151400]
BCS1L	ENSG00000074582	617	BCS;BCS1;FLNMS;GRACILE;Hs.6719;h-BCS	2q33	Q9Y276	H-BCS1	Mitochondria;Mitochondrial-inner-membrane	9878253	Respiratory-chain-complex-III-(RCCIII);RCCIII-assembly	603647	Deficiency-of-respiratory-chain-complex-III-(RCC3)-[124000];Gracile-syndrome-(FLNMS)-[603358]
CASP8	ENSG00000064012	841	CAP4;FLICE;MACH;MCH5;MGC78473	2q33-q34	Q14790	Caspase-8 precursor	Cytoplasm;Mitochondria	10822379		601763	Colorectal-cancer-(CRC)-[114500];Hepatocellular-carcinoma-(HCC)-[114550];Autoimmune-lymphoproliferative-syndrome-type-2B-(ALPS2B)-[607271]
CLN3	ENSG00000188603	1201	BTS;MGC102840	16p12.1	Q13286	CLN3 protein	Cytoplasm;Golgi-apparatus;Lysosome;Mitochondria-related	8980123;9949212		607042	Neuronal-ceroid-lipofuscinosis-juvenile-type-(CLN3)-[204200]
COX10	ENSG00000006695	1352	-	17p12-p11.2	Q12887	Protoheme IX farnesyltransferase, mitochondrial precursor	Mitochondria;Mitochondrial-inner-membrane	8078902	Respiratory-chain-complex-IV-(RCCIV);RCCIV-assembly	602125	Deficiency-of-respiratory-chain-complex-IV-(RCC4)-[220110]
COX15	ENSG00000014919	1355	-	10q24	Q7KZN9	Cytochrome c oxidase assembly protein COX15 homolog	Mitochondria;Mitochondrial-inner-membrane	15235026	Respiratory-chain-complex-IV-(RCCIV);RCCIV-assembly	603646	Deficiency-of-respiratory-chain-complex-IV-(RCC4)-[220110]
CPOX	ENSG00000080819	1371	CPO;CPX;HCP	3q12	P36551	Coproporphyrinogen III oxidase, mitochondrial precursor	Mitochondria	8407975		121300	Hereditary-coproporphyria-(HCP)-[121300]
CPS1	ENSG00000021826	1373	-	2q35	P31327	Carbamoyl-phosphate synthase [ammonia], mitochondrial precursor	Mitochondria;Mitochondrial-matrix	11577071;15876373	Urea-cycle	608307	Carbamoyl-phosphate-synthetase-I-deficiency-(CPS1D)-[237300]
CPT1A	ENSG00000110090	1374	CPT1;CPT1-L;L-CPT1	11q13.1-q13.2	P50416	Carnitine O-palmitoyltransferase I, mitochondrial liver isoform	Mitochondria;Mitochondrial-outer-membrane;Nucleus	7892212		600528	Carnitine-O-palmitoyltransferase-I-deficiency-[255120]
CPT2	ENSG00000157184	1376	CPT1;CPTASE	1p32	P23786	Carnitine O-palmitoyltransferase II, mitochondrial precursor	Mitochondria;Mitochondrial-inner-membrane	10577999		600650	Carnitine-O-palmitoyltransferase-II-deficiency-(late-onset-form)-[255110];Carnitine-O-palmitoyltransferase-II-deficiency-(infantile-form)-[600649]
CYB5A	ENSG00000166347	1528	CYB5;MCB5	18q23	P00167	Cytochrome b5	Cytoplasm;Endoplasmatic-reticulum;Microsome;Mitochondria;Mitochondrial-outer-membrane	12668680;14733950		250790	Methemoglobinemia-(type-IV)-due-to-deficiency-of-CYB5-[250790]
CYB5R3	ENSG00000100243	1727	B5R;DIA1	22q13.31-qter|22q13.2-q13.31	P00387	NADH-cytochrome b5 reductase (B5R) (Diaphorase-1)	Endoplasmatic-reticulum;Membrane;Mitochondria;Mitochondrial-outer-membrane	7668255		250800	Methemoglobinemia-(type-I-and-II)-due-to-deficiency-of-CYB5-[250800]
CYBA	ENSG00000051523	1535	-	16q24	P13498	Cytochrome b-245 light chain (p22 phagocyte B-cytochrome) (Neutrophil cytochrome B, 22 kDa polypeptide) (p22-phox) (p22phox) (Cytochrome B(558) alpha chain) (Cytochrome b558 alpha-subunit) (Superoxide-generating NADPH oxidase light chain subunit)	Membrane;Mitochondria-related	10788525	NADPH-oxidase-complex	608508	Chronic-granulomatosis-disease-(CGD)-[233690]
CYBB	ENSG00000165168	1536	CGD;GP91-1;GP91-PHOX;GP91PHOX;NOX2	Xp21.1	P04839	Cytochrome B-245 heavy chain (P22 phagocyte B-cytochrome) (Neutrophil cytochrome B, 91 kDa polypeptide) (CGD91-PHOX) (GP91-PHOX) (GP91-1) (Heme binding membrane glycoprotein GP91PHOX) (Cytochrome B(558) beta chain) (Superoxide-generating NADPH oxidase heavy chain subunit) (NADPH oxidase 2) (NOX2)	Membrane;Mitochondria-related	10788525	NADPH-oxidase-complex	300481	Chronic-granulomatosis-disease-X-linked-(CGD)-[306400]
CYP11A1	ENSG00000140459	1583	CYP11A;P450SCC	15q23-q24	P05108	Cytochrome P450 11A1, mitochondrial precursor	Mitochondria;Mitochondrial-inner-membrane	1863359;16038609		118485	Congenital-lipoid-adrenal-hyperplasia-(CLAH)-[201710]
CYP11B1	ENSG00000160882	1584	CPN1;CYP11B;DKFZp686B05283;FHI;FLJ36771;P450C11	8q21	P15538	Cytochrome P450 11B1, mitochondrial precursor	Mitochondria;Mitochondrial-inner-membrane	2592361		610613	Familial-Hyperaldosteronism-type-I-(FH1)-[103900];Adrenal-hyperplasia-type-IV-(AH-IV)-[202010]
CYP11B2	ENSG00000179142	1585	ALDOS;CPN2;CYP11B;CYP11BL;P-450C18;P450C18;P450aldo	8q21-q22	P19099	Cytochrome P450 11B2, mitochondrial precursor	Mitochondria;Mitochondrial-inner-membrane	9177280		124080	Familial-Hyperaldosteronism-type-I-(FH1)-[103900];Deficiency-of-corticosterone-methyloxidase-(CMO)-[124080]
CYP27A1	ENSG00000135929	1593	CP27;CTX;CYP27	2q33-qter	Q02318	Cytochrome P450 27, mitochondrial precursor	Mitochondria	1708392		606530	Cerebrotendinous-xanthomatosis-(CTX)-[213700]
CYP27B1	ENSG00000111012	1594	CP2B;CYP1;CYP1alpha;CYP27B;P450c1;PDDR;VDD1;VDDR;VDDRI;VDR	12q13.1-q13.3	O15528	25-hydroxyvitamin D-1 alpha hydroxylase, mitochondrial precursor	Mitochondria;Mitochondrial-inner-membrane	9428799		609506	Vitamin-D-dependent-rickets-type-1-(VDDR1)-[264700]
DBT	ENSG00000137992	1629	BCATE2;E2;E2B;MGC9061	1p31	P11182	Lipoamide acyltransferase component of branched-chain alpha-keto acid dehydrogenase complex, mitochondrial precursor	Mitochondria;Mitochondrial-matrix	1429740	Branched-chain-alpha-keto-acid-dehydrogenase-complex-(BCKDH)	248610	Maple-syrup-urine-disease-(MSUD)-[248600]
DGUOK	ENSG00000114956	1716	dGK	2p13	Q16854	Deoxyguanosine kinase, mitochondrial precursor	Mitochondria;Mitochondrial-matrix	10951205		601465	Mitochondrial-DNA-depletion-syndrome-(MDS-hepatocerebral-form)-[251880]
DLAT	ENSG00000150768	1737	DLTA;PDC-E2;PDCE2	11q23.1	P10515	Dihydrolipoamide acetyltransferase component of pyruvate dehydrogenase complex, mitochondrial precursor	Mitochondria;Mitochondrial-matrix	3174635	Pyruvate-dehydrogenase-complex-(PDH)	608770	Primary-biliary-cirrhosis-(PBC)-[109720];Pyruvate-dehydrogenase-E2-deficiency-[245348]
DLD	ENSG00000091140	1738	DLDH;E3;GCSL;LAD;PHE3	7q31-q32	P09622	Dihydrolipoyl dehydrogenase, mitochondrial precursor	Mitochondria;Mitochondrial-matrix	9073359;12805207;9727038	Alpha-ketoglutarate-dehydrogenase-complex-(AKDH);Branched-chain-alpha-keto-acid-dehydrogenase-complex-(BCKDH);Glycine-cleavage-system-complex-(GCC);Pyruvate-dehydrogenase-complex-(PDH);Tricarboxylic-acid-cycle-(TCA)	238331	Maple-syrup-urine-disease-(MSUD)-[248600]
DLST	ENSG00000119689	1743	DLTS	14q24.3	P36957	Dihydrolipoyllysine-residue succinyltransferase component of 2-oxoglutarate dehydrogenase complex, mitochondrial precursor (E2)	Membrane;Mitochondria;Mitochondrial-matrix	9405249;12805207;9727038	Alpha-ketoglutarate-dehydrogenase-complex-(AKDH);Tricarboxylic-acid-cycle-(TCA)	126063	Alpha-ketoglutarate-dehydrogenase-deficiency-[203740]
DMGDH	ENSG00000132837	29958	DMGDHD;ME2GLYDH	5q14.1	Q9UI17	Dimethylglycine dehydrogenase, mitochondrial precursor	Mitochondria	1710985		605849	Dimethylglycine-dehydrogenase-deficiency-(DMGDHD)-[605850]
DMPK	ENSG00000104936	1760	DM;DM1;DM1PK;DMK;MDPK;MT-PK	19q13.3	Q09013	Myotonin-protein kinase	Cytoplasm;Endoplasmatic-reticulum;Mitochondria;Mitochondrial-outer-membrane	12897125		605377	Dystrophia-myotonica-1-(DM1)-[160900]
DNAJC19	ENSG00000205981	131118	TIM14;TIMM14	3q26.33	Q96DA6	Translocase of the inner mitochondrial membrane 14, isoform a	Mitochondria;Mitochondrial-inner-membrane	16055927	Mitochondrial-intermembrane-space-protein-transporter-complex	608977	Dilated-cardiomyopathy-with-ataxia-(DCMA)-[608977]
ECGF1	ENSG00000025708	1890	MNGIE;PDECGF;TP;hPD-ECGF	22q13|22q13.33	P19971	Thymidine phosphorylase precursor	Cytoplasm;Mitochondria-related;Nucleus	10741286;9924029		131222	Myoneurogastrointestinal-encephalopathy-syndrome-(MNGIE)-[603041]
ETFA	ENSG00000140374	2108	EMA;GA2;MADD	15q23-q25	P13804	Electron transfer flavoprotein alpha-subunit, mitochondrial precursor	Mitochondria;Mitochondrial-matrix	8617498	Electron-transfer-flavoprotein-complex-(ETF)	608053	Multiple-Acyl-CoA-dehydrogenase-deficiency-(MADD)-[231680]
ETFB	ENSG00000105379	2109	FP585;MADD	19q13.3	P38117	Electron transfer flavoprotein beta-subunit	Mitochondria;Mitochondrial-matrix	8504797	Electron-transfer-flavoprotein-complex-(ETF)	130410	Multiple-Acyl-CoA-dehydrogenase-deficiency-(MADD)-[231680]
ETFDH	ENSG00000171503	2110	ETFQO;MADD	4q32-q35	Q16134	Electron transfer flavoprotein-ubiquinone oxidoreductase, mitochondrial precursor	Mitochondria;Mitochondrial-inner-membrane	8306995		231675	Multiple-Acyl-CoA-dehydrogenase-deficiency-(MADD)-[231680]
ETHE1	ENSG00000105755	23474	HSCO;YF13H12	19q13.31	O95571	HSCO protein	Mitochondria;Mitochondrial-matrix	14732903		608451	Ethylmalonic-encephalopathy-[602473]
FECH	ENSG00000066926	2235	EPP;FCE	18q21.3	P22830	Ferrochelatase, mitochondrial precursor	Mitochondria;Mitochondrial-inner-membrane	1985464		177000	Erythropoietic-protoporphyria-(EPP)-[177000]
FH	ENSG00000091483	2271	HLRCC;LRCC;MCL;MCUL1	1q42.1	P07954	Fumarate hydratase, mitochondrial precursor	Cytoplasm;Mitochondria;Mitochondrial-matrix	8200987	Tricarboxylic-acid-cycle-(TCA)	136850	Hereditary-multiple-cutaneous-leiomyoma-(MCUL)-[150800];Hereditary-leiomyomatosis-and-renal-cell-cancer-(HLRCC)-[605839];Deficiency-of-fumarate-hydratase-(FHD)-[606812]
FXN	ENSG00000165060	2395	CyaY;FA;FARR;FRDA;MGC57199;X25	9q13-q21.1	Q16595	Frataxin, mitochondrial precursor	Mitochondria;Mitochondrial-inner-membrane	9302253		606829	Friedreich-ataxia-1-(FRDA1)-[229300]
GATM	ENSG00000171766	2628	AGAT;AT	15q21.1	P50440	Glycine amidinotransferase, mitochondrial precursor	Cytoplasm;Mitochondria;Mitochondrial-intermembrane-space	9218780		602360	Arginine-glycine-amidinotransferase-deficiency-(AGAT)-[602360]
GCDH	ENSG00000105607	2639	ACAD5;GCD	19p13.2	Q92947	Glutaryl-CoA dehydrogenase, mitochondrial precursor	Mitochondria;Mitochondrial-matrix	8541831		608801	Glutaric-acidemia-type-I-(GA-I)-[231670]
GCK	ENSG00000106633	2645	GK;GLK;HHF3;HK4;HKIV;HXKP;MODY2	7p15.3-p15.1	P35557	Hexokinase D	Mitochondria;Mitochondrial-outer-membrane	12931191		138079	Maturity-onset-diabetes-of-the-young-type-II-(MODY2)-[125851];Noninsulin-dependent-diabetes-mellitus-(NIDDM)-[125853];Autosomal-dominant-Hyperinsulinism-(ADHI)-[602485];Permanent-neonatal-diabetes-mellitus-(PNDM)-[606176]
GCSH	ENSG00000140905	2653	GCE;NKH	16q23.2	P23434	Glycine cleavage system H protein, mitochondrial precursor	Mitochondria	6790577	Glycine-cleavage-system-complex-(GCC)	238330	Glycine-encephalopathy-(GCE)-[605899]
GDAP1	ENSG00000104381	54332	-	8q21.11	Q8TB36	Ganglioside-induced differentiation-associated protein 1	Mitochondria;Mitochondrial-outer-membrane	16172208;15772096		606598	Charcot-Marie-Tooth-disease-type-4A-(CMT4A)-[214400];Charcot-Marie-Tooth-disease-with-vocal-cord-paresis-[607706];Charcot-Marie-Tooth-disease-intermediate-A-(CMTRIA)-[608340]
GFM1	ENSG00000168827	85476	COXPD1;EFG;EFG1;EFGM;EGF1;FLJ12662;FLJ13632;FLJ20773;GFM;hEFG1	3q25.1-q26.2	Q96RP9	Elongation factor G 1, mitochondrial precursor (mEF-G 1)	Mitochondria	15537906		606639	Combined-oxidative-phosphorylation-deficiency-COXPD1-[609060]
GK	ENSG00000198814	2710	GK1;GKD	Xp21.3	P32189	Glycerol kinase	Cytoplasm;Mitochondria;Mitochondrial-outer-membrane	2988520;10444329		300474	Hyperglycerolemia-(GKD)-[307030]
GLDC	ENSG00000178445	2731	GCE;GCSP;HYGN1;MGC138198;MGC138200;NKH	9p22	P23378	Glycine dehydrogenase [decarboxylating], mitochondrial precursor	Mitochondria	6778858	Glycine-cleavage-system-complex-(GCC)	238300	Glycine-encephalopathy-(GCE)-[605899]
GLUD1	ENSG00000148672	2746	GDH;GLUD;MGC132003	10q23.3	P00367	Glutamate dehydrogenase 1, mitochondrial precursor	Mitochondria;Mitochondrial-matrix	10812208		138130	Familial-Hyperinsulinemic-Hypoglycemia-(HHF6)-[606762]
GPD2	ENSG00000115159	2820	GDH2;mGPDH	2q24.1	P43304	Glycerol-3-phosphate dehydrogenase, mitochondrial precursor	Mitochondria	9070847		138430	Noninsulin-dependent-diabetes-mellitus-(NIDDM)-[125853]
HADH	ENSG00000138796	3033	HAD;HADH1;HADHSC;HHF4;M/SCHAD;MGC8392;SCHAD	4q22-q26	Q16836	Short chain 3-hydroxyacyl-CoA dehydrogenase, mitochondrial precursor (HCDH) (Medium and short chain L-3-hydroxyacyl-coenzyme A dehydrogenase)	Mitochondria;Mitochondrial-matrix	11559359		601609	3-alpha-hydroxyacyl-CoA-dehydrogenase-deficiency-(HAD)-[231530]
HADHA	ENSG00000084754	3030	GBP;HADH;LCHAD;MGC1728;MTPA;TP-ALPHA	2p23	P40939	Trifunctional enzyme alpha subunit, mitochondrial precursor	Mitochondria;Mitochondrial-inner-membrane	1550553;15229654	Mitochondrial-trifunctional-protein-complex	600890	Trifunctional-protein-deficiency-(MTPD)-[609015];Long-chain-3-hydroxyl-CoA-dehydrogenase-deficiency-(LCHAD)-[609016]
HADHB	ENSG00000138029	3032	MGC87480;MSTP029;TP-BETA	2p23	P55084	Trifunctional enzyme beta subunit, mitochondrial precursor	Mitochondria;Mitochondrial-inner-membrane	1550553;15229654	Mitochondrial-trifunctional-protein-complex	143450	Trifunctional-protein-deficiency-(MTPD)-[609015]
HD	ENSG00000197386	3064	HTT;IT15	4p16.3	P42858	Huntingtin (Huntington's disease protein) (HD protein)	Cytoplasm;Mitochondria-related;Nucleus	15340079;9778247		143100	Huntington-disease-(HD)-[143100]
HK1	ENSG00000156515	3098	HK1-ta;HK1-tb;HK1-tc;HKI;HXK1	10q22	P19367	Hexokinase, type I	Mitochondria;Mitochondrial-outer-membrane	11204446		142600	Hexokinase-deficiency-hemolytic-anemia-[235700]
HLCS	ENSG00000159267	3141	HCS	21q22.1|21q22.13	P50747	Biotin-protein ligase	Cytoplasm;Mitochondria	7753853		609018	Multiple-carboxylase-deficiency-(MCD)-[253270]
HMGCL	ENSG00000117305	3155	HL	1p36.1-p35	P35914	Hydroxymethylglutaryl-CoA lyase, mitochondrial precursor	Mitochondria;Mitochondrial-matrix	8102917		246450	HMG-CoA-lyase-deficiency-(HMGCL)-[246450]
HMGCS2	ENSG00000134240	3158	-	1p13-p12	P54868	Hydroxymethylglutaryl-CoA synthase, mitochondrial precursor	Mitochondria;Mitochondrial-matrix	7851882;1971108		600234	HMG-CoA-synthase-deficiency-(HMGCS2)-[605911]
HSD17B10	ENSG00000072506	3028	17b-HSD10;ABAD;ERAB;HADH2;HCD2;MHBD;SCHAD	Xp11.2	Q99714	3-hydroxyacyl-CoA dehydrogenase type II (Type II HADH)	Mitochondria	10329704;11430884		300256	Hydroxyacyl-CoA-dehydrogenase-deficiency-type-II-(MHBD)-[300438]
HSD3B2	ENSG00000203859	3284	HSDB;HSDB3	1p13.1	P26439	3 beta-hydroxysteroid dehydrogenase/delta 5->4-isomerase type II	Endoplasmatic-reticulum;Mitochondria	305825;10514560		201810	Adrenal-hyperplasia-type-II-(AH-II)-[201810]
HSPD1	ENSG00000144381	3329	CPN60;GROEL;HSP60;HSP65;HuCHA60;SPG13	2q33.1	P10809	60 kDa heat shock protein, mitochondrial precursor	Endoplasmatic-reticulum;Mitochondria	1972619		118190	Autosomal-dominant-spastic-paraplegia-(SPG13)-[605280]
HTRA2	ENSG00000115317	27429	OMI;PARK13;PRSS25	2p12	O43464	Serine protease HTRA2, mitochondrial precursor (High temperature requirement protein A2) (HtrA2) (Omi stress-regulated endoprotease) (Serine proteinase OMI)	Cytoplasm;Endoplasmatic-reticulum;Mitochondria;Mitochondrial-intermembrane-space	15961413		606441	Parkinson-disease-(PD)-[168600]
IVD	ENSG00000128928	3712	ACAD2	15q14-q15	P26440	Isovaleryl-CoA dehydrogenase, mitochondrial precursor	Mitochondria;Mitochondrial-matrix	10713113		607036	Isovaleric-acidemia-(IVA)-[243500]
KIF1B	ENSG00000054523	23095	CMT2;CMT2A;CMT2A1;FLJ23699;HMSNII;KIAA0591;KIAA1448;KLP;MGC134844	1p36.2	O60333	Kinesin-like protein KIF1B	Cytoplasm;Mitochondria;Mitochondrial-outer-membrane	7528108;11389829		605995	Charcot-Marie-Tooth-disease-type-2A1-(CMT2A1)-[118210]
LRPPRC	ENSG00000138095	10128	CLONE-23970;GP130;LRP130;LSFC	2p21	P42704	130 kDa leucine-rich protein	Endoplasmatic-reticulum;Mitochondria;Nucleus	12529507;12832482;15081402		607544	Leigh-syndrome-French-Canadian-type-(LSFC)-[220111]
LRRK2	ENSG00000188906	120892	AURA17;PARK8;RIPK7;ROCO2	12q12	Q5S007	Leucine-rich repeat kinase 2	Cytoplasm;Mitochondria;Mitochondrial-outer-membrane	16269541;16352719		609007	Parkinson-disease-(PARK8)-[607060]
MAOA	ENSG00000189221	4128	-	Xp11.3	P21397	Amine oxidase [flavin-containing] A	Mitochondria;Mitochondrial-outer-membrane	4291912		309850	Brunner's-syndrome-[309850]
MCCC1	ENSG00000078070	56922	DKFZp686B20267;FLJ25545;MCC-B;MCCA	3q27	Q96RQ3	Methylcrotonyl-CoA carboxylase alpha chain, mitochondrial precursor	Mitochondria;Mitochondrial-matrix	11406611	Methylcrotonyl-CoA-carboxylase-(MCC)	609010	3-Methylcrotonyl-CoA-carboxylase-1-deficiency-(MCCC1)-[210200]
MCCC2	ENSG00000131844	64087	MCCB	5q12-q13	Q9HCC0	Methylcrotonyl-CoA carboxylase beta chain, mitochondrial precursor	Mitochondria;Mitochondrial-matrix	11406611	Methylcrotonyl-CoA-carboxylase-(MCC)	609014	3-Methylcrotonyl-CoA-carboxylase-2-deficiency-(MCCC2)-[210210]
ME2	ENSG00000082212	4200	-	6p25-p24|18q21	P23368	NAD-dependent malic enzyme, mitochondrial precursor	Mitochondria;Mitochondrial-matrix	1993674;15532013		154270	Idiopathic-generalized-epilepsy-(IGE)-[600669]
MFN2	ENSG00000116688	9927	CMT2A;CMT2A2;CPRP1;HSG;KIAA0214;MARF	1p36.22	O95140	Transmembrane GTPase MFN2	Mitochondria;Mitochondrial-outer-membrane	11950885		608507	Peripheral-neuropathy-and-optic-atrophy-(HMSNVI)-[601152];Charcot-Marie-Tooth-disease-type-2A2-(CMT2A2)-[609260]
MLYCD	ENSG00000103150	23417	MCD;MGC59795	16q24	O95822	Malonyl-CoA decarboxylase, mitochondrial precursor	Cytoplasm;Mitochondria;Peroxisome	4180063;10417274;10455107;12955715		606761	Malonyl-CoA-decarboxylase-deficiency-(MLYCD)-[248360]
MMAA	ENSG00000151611	166785	MGC120010;MGC120011;MGC120012;MGC120013	4q31.22	Q8IVH4	Methylmalonic aciduria type A protein, mitochondrial precursor	Mitochondria	12438653		607481	Methylmalonic-aciduria-cblA-type-(MMAA)-[251100]
MMAB	ENSG00000139428	326625	ATR;MGC20496	12q24	Q96EY8	Cob(I)yrinic acid a,c-diamide adenosyltransferase, mitochondrial [Precursor]	Mitochondria	12438653		607568	Methylmalonic-aciduria-cblB-type-(MMAB)-[251110]
MPV17	ENSG00000115204	4358	SYM1	2p23.3	P39210	Protein Mpv17	Mitochondria;Mitochondrial-inner-membrane	16582910		137960	Mitochondrial-DNA-depletion-syndrome-(MDS-hepatocerebral-form)-[251880];Navajo-neurohepatopathy-(NNH)-[256810]
MRPS16	ENSG00000182180	51021	CGI-132;COXPD2;FLJ22062;FLJ40972;MRP-S16;RPMS16	10q22.1	Q9Y3D3	28S ribosomal protein S16, mitochondrial precursor (S16mt) (MRP-S16)	Mitochondria	15505824	Mitochondrial-ribosome-complex	609204	Combined-oxidative-phosphorylation-deficiency-COXPD2-[610498]
MTCP1	ENSG00000182712	4515	C6.1B	Xq28	P56278	P8 MTCP-1 protein	Cytoplasm;Mitochondria	7784073;7970717		300116	Chronic-lymphocytic-leukemia-(TCL1)-[186960]
MTHFD1	ENSG00000100714	4522	MTHFC;MTHFD	14q24	P11586	C-1-tetrahydrofolate synthase, cytoplasmic	Cytoplasm;Mitochondria-related	3528153;15611115		172460	Neural-tube-defects-(NTD)-[601634]
MTRR	ENSG00000124275	4552	MGC129643;MSR	5p15.3-p15.2	Q9UBK8	Methionine synthase reductase, mitochondrial precursor	Cytoplasm;Mitochondria	14651971		602568	Homocystinuria-megaloblastic-anemia-due-to-defects-in-cobalamin-metabolism-(cblE)-[236270];Neural-tube-defects-(NTD)-[601634]
MUT	ENSG00000146085	4594	MCM	6p21	P22033	Methylmalonyl-CoA mutase, mitochondrial precursor	Mitochondria;Mitochondrial-matrix	9554742		609058	Methylmalonicaciduria-due-to-MCM-deficiency-[251000]
NAGS	ENSG00000161653	162417	AGAS;ARGA;MGC133025	17q21.31	Q8N159	N-acetylglutamate synthetase	Mitochondria;Mitochondrial-matrix	5096083;12459178	Urea-cycle	608300	N-acethylglutamase-synthase-deficiency-(NAGSD)-[237310]
NDUFA12L	ENSG00000164182	91942	B17.2L;FLJ22398;MMTN;mimitin	5q12.1	Q8N183	Mimitin, mitochondrial precursor (Myc-induced mitochondrial protein)	Mitochondria;Mitochondrial-inner-membrane	16200211;15774466	Respiratory-chain-complex-I-(RCCI);RCCI-assembly	609653	Deficiency-of-respiratory-chain-complex-I-(RCC1)-[252010]
NDUFS1	ENSG00000023228	4719	CI-75Kd;MGC26839;PRO1304	2q33-q34	P28331	NADH-ubiquinone oxidoreductase 75 kDa subunit, mitochondrial precursor	Mitochondria;Mitochondrial-inner-membrane	9878551	Respiratory-chain-complex-I-(RCCI)	157655	Deficiency-of-respiratory-chain-complex-I-(RCC1)-[252010]
NDUFS2	ENSG00000158864	4720	-	1q23	O75306	NADH-ubiquinone oxidoreductase 49 kDa subunit, mitochondrial precursor	Mitochondria;Mitochondrial-inner-membrane	9585441	Respiratory-chain-complex-I-(RCCI)	602985	Deficiency-of-respiratory-chain-complex-I-(RCC1)-[252010]
NDUFS3	ENSG00000110536	4722	-	11p11.11	O75489	NADH-ubiquinone oxidoreductase 30 kDa subunit, mitochondrial precursor	Mitochondria;Mitochondrial-inner-membrane	14729820	Respiratory-chain-complex-I-(RCCI)	603846	Deficiency-of-respiratory-chain-complex-I-(RCC1)-[252010]
NDUFS4	ENSG00000164258	4724	AQDQ	5q11.1	O43181	NADH-ubiquinone oxidoreductase 18 kDa subunit, mitochondrial precursor	Mitochondria;Mitochondrial-inner-membrane	9463323	Respiratory-chain-complex-I-(RCCI)	602694	Deficiency-of-respiratory-chain-complex-I-(RCC1)-[252010]
NDUFS6	ENSG00000145494	4726	-	5p15.33	O75380	NADH-ubiquinone oxidoreductase 13 kDa-A subunit, mitochondrial precursor	Mitochondria;Mitochondrial-inner-membrane	15372108	Respiratory-chain-complex-I-(RCCI)	603848	Deficiency-of-respiratory-chain-complex-I-(RCC1)-[252010]
NDUFS7	ENSG00000115286	374291	FLJ45860;FLJ46880;MGC120002;PSST	19p13.3	O75251	NADH-ubiquinone oxidoreductase 20 kDa subunit, mitochondrial precursor	Mitochondria;Mitochondrial-inner-membrane	10360771	Respiratory-chain-complex-I-(RCCI)	601825	Deficiency-of-respiratory-chain-complex-I-(RCC1)-[252010]
NDUFS8	ENSG00000110717	4728	TYKY	11q13	O00217	NADH-ubiquinone oxidoreductase 23 kDa subunit, mitochondrial precursor	Mitochondria;Mitochondrial-inner-membrane	9837812	Respiratory-chain-complex-I-(RCCI)	602141	Deficiency-of-respiratory-chain-complex-I-(RCC1)-[252010]
NDUFV1	ENSG00000167792	4723	UQOR1	11q13	P49821	NADH-ubiquinone oxidoreductase 51 kDa subunit, mitochondrial precursor	Mitochondria;Mitochondrial-inner-membrane	8288251	Respiratory-chain-complex-I-(RCCI)	161015	Deficiency-of-respiratory-chain-complex-I-(RCC1)-[252010]
NDUFV2	ENSG00000178127	4729	-	18p11.31-p11.2	P19404	NADH-ubiquinone oxidoreductase 24 kDa subunit, mitochondrial precursor	Mitochondria;Mitochondrial-inner-membrane	12754703	Respiratory-chain-complex-I-(RCCI)	600532	Deficiency-of-respiratory-chain-complex-I-(RCC1)-[252010]
OAT	ENSG00000065154	4942	DKFZp781A11155;HOGA	10q26	P04181	Ornithine aminotransferase, mitochondrial precursor	Mitochondria;Mitochondrial-matrix	8281144		258870	Ornithine-aminotransferase-deficiency-(OAT)-[258870]
OGDH	ENSG00000105953	4967	AKGDH;E1k;OGDC	7p14-p13	Q02218	2-oxoglutarate dehydrogenase E1 component, mitochondrial precursor	Mitochondria;Mitochondrial-matrix	8020988;1542694;12805207;9727038	Alpha-ketoglutarate-dehydrogenase-complex-(AKDH);Tricarboxylic-acid-cycle-(TCA)	203740	Alpha-ketoglutarate-dehydrogenase-deficiency-[203740]
OGG1	ENSG00000114026	4968	HMMH;HOGG1;MUTM;OGH1	3p26.2	O15527	N-glycosylase/DNA lyase	Mitochondria;Mitochondrial-inner-membrane;Nucleus	10233168;11554447		601982	Hereditary-renal-cell-carcinoma-(RCC1)-[144700];Prostate-cancer-[176807];Lung-cancer-[211980];Squamous-cell-carcinoma-of-the-head-and-neck-(HNSCC)-[275355]
OPA1	ENSG00000198836	4976	FLJ12460;KIAA0567;NPG;NTG;largeG	3q28-q29|3q28-q29	O60313	Dynamin-like 120 kDa protein, mitochondrial precursor	Mitochondria;Mitochondrial-inner-membrane	12123827		605290	Optic-atrophy-1-and-deafness-[125250];Optic-atrophy-1-(OPA1)-[165500];Susceptibility-to-normal-tension-glaucoma-(NPG)-[606657]
OPA3	ENSG00000125741	80207	FLJ22187;FLJ25932;MGA3;MGC75494	19q13.32	Q9H6K4	Optic atrophy 3 protein	Mitochondria	11668429		606580	Optic-atrophy-and-cataract-(ADOAC)-[165300];3-methylglutaconicaciduria-type-III-(MGAIII)-[258501]
OTC	ENSG00000036473	5009	MGC129967;MGC129968;MGC138856;OCTD	Xp21.1	P00480	Ornithine carbamoyltransferase, mitochondrial precursor	Mitochondria;Mitochondrial-matrix	3891325	Urea-cycle	300461	Hyperammonemia-due-to-ornithine-transcarbamylase-deficieny-(OTCD)-[311250]
OXCT1	ENSG00000083720	5019	OXCT;SCOT	5p13.1	P55809	Succinyl-CoA:3-ketoacid-coenzyme A transferase, mitochondrial precursor	Mitochondria;Mitochondrial-matrix	10964512		601424	Deficiency-of-Succinyl-CoA:3-oxoacid-CoA-transferase-(OXCT)-[245050]
PANK2	ENSG00000125779	80025	C20orf48;HARP;HSS;MGC15053;NBIA1;PKAN	20p13	Q9BZ23	Pantothenate kinase 2, mitochondrial precursor	Mitochondria;Mitochondrial-matrix	12554685;16437574		606157	Pantothenate-kinase-associated-neurodegeneration-(PKAN)-[234200];Hypoprebetalipoproteinemia-acanthocytosis-retinitis-pigmentosa-and-pallidal-degeneration-(HARP)-[607236]
PARK7	ENSG00000116288	11315	DJ-1;DJ1;FLJ27376	1p36.33-p36.12	Q99497	Protein DJ-1 (Oncogene DJ1)	Cytoplasm;Mitochondria;Mitochondrial-matrix;Nucleus	15944198;16298734;15365989		602533	Amyotrophic-lateral-sclerosis-parkinsonism-dementia-complex1-(Guam-disease)-[105500];Early-onset-Parkinson-disease-(PARK7)-[606324]
PARL	ENSG00000175193	55486	PRO2207;PSARL;PSARL1;PSENIP2;RHBDS1	3q27.1	Q9H300	Presenilins-associated rhomboid-like protein, mitochondrial precursor	Mitochondria;Mitochondrial-inner-membrane;Nucleus	12774122;12214059;14732705		607858	Noninsulin-dependent-diabetes-mellitus-(NIDDM)-[125853]
PC	ENSG00000173599	5091	PCB	11q13.4-q13.5	P11498	Pyruvate carboxylase, mitochondrial precursor	Mitochondria;Mitochondrial-matrix	7918683		608786	Pyruvate-carboxylase-deficiency-(PC)-[266150]
PCCA	ENSG00000175198	5095	-	13q32	P05165	Propionyl-CoA carboxylase alpha chain, mitochondrial precursor	Mitochondria;Mitochondrial-matrix	8188292	Propionyl-CoA-carboxylase-(PCC)	232000	Propionic-acidemia-(PCCD)-[606054]
PCCB	ENSG00000114054	5096	DKFZp451E113	3q21-q22	P05166	Propionyl-CoA carboxylase beta chain, mitochondrial precursor	Mitochondria;Mitochondrial-matrix	8188292	Propionyl-CoA-carboxylase-(PCC)	232050	Propionic-acidemia-(PCCD)-[606054]
PCK2	ENSG00000100889	5106	PEPCK;PEPCK-M;PEPCK2	14q12	Q16822	Phosphoenolpyruvate carboxykinase, mitochondrial precursor [GTP]	Cytoplasm;Mitochondria	8645161		261650	Phosphoenolpyruvate-carboxykinase-2-deficiency-(PEPCK2)-[261650]
PDHA1	ENSG00000131828	5160	PDHA;PDHCE1A;PHE1A	Xp22.2-p22.1	P08559	Pyruvate dehydrogenase E1 component alpha subunit, somatic form, mitochondrial precursor	Mitochondria;Mitochondrial-matrix	7573035	Pyruvate-dehydrogenase-complex-(PDH);Tricarboxylic-acid-cycle-(TCA)	300502	Leigh-syndrome-X-linked-(LS-X)-[308930];Pyruvate-decarboxylase-deficiency-[312170]
PDHB	ENSG00000168291	5162	DKFZp564K0164;PHE1B	3p21.1-p14.2	P11177	Pyruvate dehydrogenase E1 component beta subunit, mitochondrial precursor	Mitochondria;Mitochondrial-matrix	2376596	Pyruvate-dehydrogenase-complex-(PDH)	179060	Pyruvate-dehydrogenase-E1-beta-deficiency-[179060]
PDHX	ENSG00000110435	8050	DLDBP;E3BP;OPDX;PDX1;proX	11p13	O00330	Pyruvate dehydrogenase protein X component, mitochondrial precursor	Mitochondria;Mitochondrial-matrix	9467010	Pyruvate-dehydrogenase-complex-(PDH)	608769	Pyruvate-dehydrogenase-E3-binding-protein-deficiency-[245349]
PEO1	ENSG00000107815	56652	C10orf2;FLJ21832;PEO;PEOA3;SANDO;TWINL	10q23.3-q24.3	Q96RR1	Putative T7-like mitochondrial DNA helicase	Mitochondria;Mitochondrial-matrix	11431692		606075	Infantile-onset-spinocerebellar-ataxia-(IOSCA)-[271245];Sensory-ataxic-neuropathy-dysarthria-and-ophthalmoparesis-(SANDO)-[607459];Progressive-external-ophthalmoplegia-with-mitochondrial-DNA-deletions-(PEOA3)-[609286]
PHB	ENSG00000167085	5245	-	17q21	P35232	Prohibitin	Cytoplasm;Mitochondria;Nucleus	15250827;14500729		176705	Sporadic-breast-cancer-[176705]
PINK1	ENSG00000158828	65018	BRPK;FLJ27236;PARK6	1p36	Q9BXM7	Serine/threonine kinase PINK1, mitochondrial precursor (PTEN induced utative kinase protein 1) (BRPK)	Mitochondria	15087508;16207731		608309	Early-onset-Parkinson-disease-(PARK6)-[605909]
POLG	ENSG00000140521	5428	FLJ27114;PEO;POLG1;POLGA;SANDO;SCAE	15q25	P54098	DNA polymerase gamma subunit 1	Mitochondria	10608893;12087165	DNA-polymerase-complex	174763	Progressive-external-ophthalmoplegia-with-mitochondrial-DNA-deletions-(PEOA1)-[157640];Susceptibility-for-male-infertility-[174763];Alpers-diffuse-degeneration-of-cerebral-gray-matter-with-hepatic-cirrhosis-(PNDC)-[203700];Progressive-external-ophthalmoplegia-with-mitochondrial-DNA-deletions-(PEOB)-[258450];Sensory-ataxic-neuropathy-dysarthria-and-ophthalmoparesis-(SANDO)-[607459]
POLG2	ENSG00000136480	11232	HP55;MTPOLB;PEOA4;POLB;POLGB	17q	Q9UHN1	DNA polymerase gamma subunit 2, mitochondrial precursor	Mitochondria	16685652	DNA-polymerase-complex	604983	Progressive-external-ophthalmoplegia-with-mitochondrial-DNA-deletions-(PEOA1)-[157640]
PPOX	ENSG00000143224	5498	MGC8485;PPO;V290M;VP	1q22	P50336	Protoporphyrinogen oxidase	Mitochondria;Mitochondrial-inner-membrane	7713909		600923	Porphyria-variegata-(VP)-[176200]
PRODH	ENSG00000100033	5625	FLJ33744;HSPOX2;MGC148078;MGC148079;PIG6;PRODH1;PRODH2;SCZD4;TP53I6	22q11.21	O43272	Proline oxidase, mitochondrial precursor	Mitochondria;Mitochondrial-inner-membrane	15662599;11069295;8776899		606810	Hyperprolinemia-type-I-(HP-I)-[239500];Susceptibility-for-schizophrenia-4-(SCZD4)-[600850]
PUS1	ENSG00000177192	80324	MGC11268;MLASA	12q24.33	Q9Y606	tRNA pseudouridine synthase A	Mitochondria	15108122		608109	Mitochondrial-myopathy-and-sideroblastic-anemia-(MLASA)-[600462]
RMRP	ENSG00000199916	6023	CHH;RMRPR	9p21-p12	M29916	Human mitochondrial RNA-processing endoribonuclease RNA (mrp) gene	Mitochondria;Mitochondrial-matrix;Nucleus	3582365		157660	Cartilage-hair-hypoplasia-(CHH)-[250250];Metaphyseal-dysplasia-without-hypotrichosis-(CHHV)-[250460];Anauxetic-dysplasia-[607095]
RNASEL	ENSG00000135828	6041	DKFZp781D08126;MGC104972;MGC133329;PRCA1;RNS4	1q25	Q05823	2-5A-dependent ribonuclease	Cytoplasm;Mitochondria	11585831;16532271		180435	Pancreatic-carcinoma-[260350];Hereditary-prostata-cancer-1-(HPC1);Susceptibility-to-prostata-cancer-(PCS1)-[601518]
SCO1	ENSG00000133028	6341	SCOD1	17p12-p13	O75880	SCO1 protein homolog, mitochondrial precursor	Mitochondria	9878253	Respiratory-chain-complex-IV-(RCCIV);RCCIV-assembly	603644	Deficiency-of-respiratory-chain-complex-IV-(RCC4)-[220110]
SCO2	ENSG00000130489	9997	MGC125823;MGC125825;SCO1L	22q13.33	O43819	SCO2 protein homolog, mitochondrial precursor	Mitochondria	10218584	Respiratory-chain-complex-IV-(RCCIV);RCCIV-assembly	604272	Fatale-infantile-cardioencephalopathy-due-to-cytochrome-c-oxidase-deficiency-(FIC)-[604377]
SDHA	ENSG00000073578	6389	FP;SDH2;SDHF	5p15	P31040	Succinate dehydrogenase [ubiquinone] flavoprotein subunit, mitochondrial precursor	Mitochondria;Mitochondrial-inner-membrane	7550341	Respiratory-chain-complex-II-(RCCII);Tricarboxylic-acid-cycle-(TCA)	600857	Deficiency-of-respiratory-chain-complex-II-(RCC2)-[252011]
SDHB	ENSG00000117118	6390	IP;PGL4;SDH;SDH1;SDHIP	1p36.1-p35	P21912	Succinate dehydrogenase [ubiquinone] iron-sulfur protein, mitochondrial precursor	Mitochondria;Mitochondrial-inner-membrane	11404820	Respiratory-chain-complex-II-(RCCII);Tricarboxylic-acid-cycle-(TCA)	185470	Paragangliomas-4-(PGL4)-[115310];Pheochromocytoma-[171300]
SDHC	ENSG00000143252	6391	CYB560;CYBL;PGL3;QPS1;SDH3	1q21	Q99643	Succinate dehydrogenase cytochrome b560 subunit, mitochondrial precursor	Mitochondria;Mitochondrial-inner-membrane	9714607	Respiratory-chain-complex-II-(RCCII);Tricarboxylic-acid-cycle-(TCA)	602413	Paragangliomas-3-(PGL3)-[605373]
SDHD	ENSG00000204370	6392	CBT1;PGL;PGL1;SDH4	11q23	O14521	Succinate dehydrogenase [ubiquinone] cytochrome B small subunit, mitochondrial precursor	Mitochondria;Mitochondrial-inner-membrane	9533030	Respiratory-chain-complex-II-(RCCII);Tricarboxylic-acid-cycle-(TCA)	602690	Intestinal-carcinoid-tumors-[114900];Paragangliomas-1-(PGL1)-[168000];Pheochromocytoma-[171300]
SLC19A2	ENSG00000117479	10560	TC1;THT1;THTR1;TRMA	1q23.3	O60779	Thiamine transporter 1 (THTR-1) (ThTr1) (Thiamine carrier 1) (TC1)	Membrane;Mitochondria-related	10978358		603941	Thiamine-responsive-megaloblastic-anemia-syndrome-(TRMA)-[249270]
SLC25A13	ENSG00000004864	10165	ARALAR2;CITRIN;CTLN2	7q21.3	Q9UJS0	Calcium-binding mitochondrial carrier protein Aralar2	Mitochondria;Mitochondrial-inner-membrane	11566871	Urea-cycle	603859	Adult-onset-citrullinemia-type-II-(CTLN2)-[603471];Neonatal-onset-citrullinemia-type-II-(NICCD)-[605814]
SLC25A15	ENSG00000102743	10166	D13S327;HHH;ORC1;ORNT1	13q14	Q9Y619	Mitochondrial ornithine transporter 1	Mitochondria;Mitochondrial-inner-membrane	10369256	Urea-cycle	603861	Hyperornithinemia-Hyperammonemia-Homocitrullinuria-syndrome-(HHH)-[238970]
SLC25A16	ENSG00000122912	8034	D10S105E;GDA;GDC;HGT.1;MGC39851;ML7;hML7	10q21.3	P16260	Grave's disease carrier protein	Mitochondria;Mitochondrial-inner-membrane	2575220		139080	Graves-disease-(GRD)-[275000]
SLC25A19	ENSG00000125454	60386	DNC;MCPHA;MUP1;TPC	17q25.3	Q9HC21	Mitochondrial deoxynucleotide carrier	Mitochondria;Mitochondrial-inner-membrane	11226231		606521	Microcephaly-amish-type-(MCPHA)-[607196]
SLC25A20	ENSG00000178537	788	CAC;CACT	3p21.31	O43772	Mitochondrial carnitine/acylcarnitine carrier protein	Mitochondria;Mitochondrial-inner-membrane	9399886		212138	Carnitine-acylcarnitine-translocase-deficiency-(CACTD)-[212138]
SLC25A22	ENSG00000177542	79751	FLJ13044;GC1	11p15.5	Q9H936	Mitochondrial glutamate carrier 1 (Glutamate/H(+) symporter 1) (Solute carrier family 25 member 22)	Mitochondria;Mitochondrial-inner-membrane	11897791;15592994		609302	Neonatal-epilepsy-with-suppression-burst-pattern-(EME)-[609304]
SLC25A4	ENSG00000151729	291	ANT;ANT1;PEO2;PEO3;T1	4q35	P12235	ADP,ATP carrier protein, heart/skeletal muscle isoform T1	Mitochondria;Mitochondrial-inner-membrane	2823266		103220	Progressive-external-ophthalmoplegia-with-mitochondrial-DNA-deletions-(PEOA2)-[609283]
SOD1	ENSG00000142168	6647	ALS;ALS1;IPOA;SOD;homodimer	21q22.1|21q22.11	P00441	Superoxide dismutase [Cu-Zn]	Cytoplasm;Endoplasmatic-reticulum;Mitochondria;Nucleus	12393885;16461917;16050975;16636275		147450	Amyotrophic-lateral-sclerosis-(ALS1)-[105400]
SPAST	ENSG00000021574	6683	ADPSP;FSP2;KIAA1083;SPG4	2p24-p21	Q9UBP0	Spastin	Microtubulus;Mitochondria-related;Nucleus	11309190;14681884;15210521		604277	Autosomal-dominant-spastic-paraplegia-(SPG4)-[182601]
SPG7	ENSG00000197912	6687	CAR;CMAR;FLJ37308;MGC126331;MGC126332;PGN	16q24.3	Q9UQ90	Paraplegin	Mitochondria;Mitochondrial-inner-membrane	9635427;14623864;16239145		602783	Autosomal-recessive-spastic-paraplegia-(SPG7)-[607259]
STAR	ENSG00000147465	6770	STARD1	8p11.2	P49675	Steroidogenic acute regulatory protein, mitochondrial precursor	Mitochondria	7548191		600617	Congenital-lipoid-adrenal-hyperplasia-(CLAH)-[201710]
SUCLA2	ENSG00000136143	8803	A-BETA	13q12.2-q13.3	Q5T9Q4	Succinate-CoA ligase, ADP-forming, beta subunit	Mitochondria;Mitochondrial-matrix	15877282	Tricarboxylic-acid-cycle-(TCA)	603921	Mitochondrial-DNA-depletion-syndrome-(MDS-myopathic-form)-[609560]
SUOX	ENSG00000139531	6821	-	12q13.2	P51687	Sulfite oxidase, mitochondrial precursor	Mitochondria;Mitochondrial-intermembrane-space	7615346		606887	Sulfocysteinuria-(ISOD)-[272300]
SURF1	ENSG00000148290	6834	-	9q34.2	Q15526	Surfeit locus protein 1	Mitochondria;Mitochondrial-inner-membrane	10556302	Respiratory-chain-complex-IV-(RCCIV);RCCIV-assembly	185620	Deficiency-of-respiratory-chain-complex-IV-(RCC4)-[220110]
TAT	ENSG00000198650	6898	-	16q22.1	P17735	Tyrosine aminotransferase	Cytoplasm;Mitochondria	4389443		276600	Tyrosine-transaminase-deficiency-(Richner-Hanhart-syndrome-RHS)-[276600]
TAZ	ENSG00000102125	6901	BTHS;CMD3A;EFE;EFE2;FLJ27390;G4.5;LVNCX;Taz1;XAP-2	Xq28	Q16635	Tafazzin	Cytoplasm;Membrane;Mitochondria;Mitochondrial-outer-membrane	10407787;16135531		300394	Dilated-Cardiomyopathy-type-3A-(CMD3A)-[300069];Isolated-noncompaction-of-left-ventricular-myocardium-(LVNCX)-[300183];Barth-syndrome-(BTHS)-[302060]
TIMM8A	ENSG00000126953	1678	DDP;DDP1;DFN1;MGC12262;MTS	Xq22.1	O60220	Mitochondrial import inner membrane translocase subunit TIM8 A	Mitochondria;Mitochondrial-intermembrane-space	10051608;11956200	Mitochondrial-intermembrane-space-protein-transporter-complex	300356	Mohr-Tranebjaerg-syndrome-(MTS)-[304700];Opticoacoustic-nerve-atrophy-with-dementia-(Jensen-syndrome)-[311150]
TK2	ENSG00000166548	7084	-	16q22-q23.1	O00142	Thymidine kinase 2, mitochondrial precursor	Mitochondria	605384		188250	Mitochondrial-DNA-depletion-syndrome-(MDS-myopathic-form)-[609560]
TP53	ENSG00000141510	7157	LFS1;TRP53;p53	17p13.1	P04637	Cellular tumor antigen p53 (Tumor suppressor p53) (Phosphoprotein p53) (Antigen NY-CO-13)	Cytoplasm;Mitochondria;Mitochondrial-outer-membrane;Nucleus	10821866;12667443		191170	Breast-cancer-(BRCA)-[114480];Colorectal-cancer-(CRC)-[114500];Hepatocellular-carcinoma-(HCC)-[114550];Li-Fraumeni-syndrome-(LFS)-[151623];Adrenocortical-carcinoma-(ADCC)-[202300];Pancreatic-carcinoma-[260350]
UCP1	ENSG00000109424	7350	SLC25A7;UCP	4q28-q31	P25874	Mitochondrial brown fat uncoupling protein 1 (UCP 1) (Thermogenin)	Mitochondria;Mitochondrial-inner-membrane	11572862	Uncoupling-protein-complex-(UCP)	113730	Noninsulin-dependent-diabetes-mellitus-(NIDDM)-[125853];Obesity-[601665]
UCP2	ENSG00000175567	7351	SLC25A8;UCPH	11q13	P55851	Mitochondrial uncoupling protein 2	Mitochondria;Mitochondrial-inner-membrane	11171965	Uncoupling-protein-complex-(UCP)	601693	Noninsulin-dependent-diabetes-mellitus-(NIDDM)-[125853];Obesity-[601665]
UCP3	ENSG00000175564	7352	SLC25A9	11q13	P55916	Mitochondrial uncoupling protein 3	Mitochondria;Mitochondrial-inner-membrane	10631320	Uncoupling-protein-complex-(UCP)	602044	Noninsulin-dependent-diabetes-mellitus-(NIDDM)-[125853];Obesity-[601665]
UNG	ENSG00000076248	7374	DGU;DKFZp781L1143;HIGM4;UDG;UNG1;UNG15	12q23-q24.1	P13051	Uracil-DNA glycosylase (UDG)	Mitochondria;Nucleus	12958596		191525	Immunodeficiency-with-hyper-IgM-type-5-(HIGM5)-[608106]
UQCRB	ENSG00000156467	7381	QP-C;QPC;UQBC;UQBP;UQPC	8q22	P14927	Ubiquinol-cytochrome c reductase complex 14 kDa protein	Mitochondria;Mitochondrial-inner-membrane	12709789	Respiratory-chain-complex-III-(RCCIII)	191330	Deficiency-of-respiratory-chain-complex-III-(RCC3)-[124000]
UROS	ENSG00000188690	7390	-	10q25.2-q26.3	P10746	Uroporphyrinogen-III synthase	Cytoplasm;Mitochondria-related	7597845;3792391		606938	Congenital-erythropoietic-porphyria-(CEP)-[263700]
WFS1	ENSG00000109501	7466	DFNA14;DFNA38;DFNA6;DIDMOAD;WFRS;WFS;WOLFRAMIN	4p16	O76024	Wolframin	Endoplasmatic-reticulum;Mitochondria-related	9817917;9771706;16195229		606201	Wolfram-syndrome-(DIDMOAD)-[222300];Autosomal-dominant-nonsyndromic-sensorineural-deafness-(DFNA6)-[600965]
WWOX	ENSG00000186153	51741	D16S432E;FOR;FRA16D;HHCMA56;PRO0128;WOX1;WWOX v8	16q23.3-q24.1	Q9NZC7	Oxidoreductase	Cytoplasm;Mitochondria;Nucleus	15664696;11744990;14695174;10786676		605131	Esophageal-squamous-cell-carcinoma-(ESCC)-[133239];Pancreatic-carcinoma-[260350]
