# Supplementary material for: Mapping Gene Associations in Human Mitochondria using Clinical Disease Phenotypes
Source: PLoS Comput Biol. 2009 Apr 24;5(4):e1000374. doi: 10.1371/journal.pcbi.1000374 (PMC2668170; doi:10.1371/journal.pcbi.1000374)
Supplement: Table S2 — 502 phenotypic features in mitochondrial disease phenotype ontology (0.06 MB XLS) [file pcbi.1000374.s005.xls]

## Sheet: TableS2
PHENOTYPIC FEATURE	MESH IDENTIFIER	HYPERNYM MESH IDENTIFIER	CLINICAL CATEGORY(CC)
Neoplasms	C04	-	ONCOLOGIC
Leukemia-Lymphoma	C04.557.337	C04	ONCOLOGIC
Connective-and-soft-tissue-neoplasms	C04.557.450	C04	ONCOLOGIC
Lipoma	C04.557.450.550.400	C04.557.450	ONCOLOGIC
Muscle-tissue-neoplasm	C04.557.450.590	C04.557.450	ONCOLOGIC
Leiomyoma	C04.557.450.590.450	C04.557.450.590	ONCOLOGIC
Leiomyosarcoma	C04.557.450.590.455	C04.557.450.590	ONCOLOGIC
Rhabdomyosarcoma	C04.557.450.590.550.660	C04.557.450.590	ONCOLOGIC
Sarcoma	C04.557.450.795	C04.557.450	ONCOLOGIC
Osteosarcoma	C04.557.450.795.620	C04.557.450.795	ONCOLOGIC
Glandular-and-epithelial-neoplasms	C04.557.470	C04	ONCOLOGIC
Basal-cell-carcinoma	C04.557.470.565.165	C04.557.470	ONCOLOGIC
Pilomatricomas	C04.557.470.565.625	C04.557.470	ONCOLOGIC
Squamous-cell-neoplasms	C04.557.470.700	C04.557.470	ONCOLOGIC
Gonadal-tissue-neoplasms	C04.557.475	C04	ONCOLOGIC
Neuroectodermal-tumors	C04.557.580.625	C04	ONCOLOGIC
Neuroendocrine-tumors	C04.557.580.625.650	C04.557.580.625	ONCOLOGIC
Carcinoid-tumor	C04.557.580.625.650.200	C04.557.580.625.650	ONCOLOGIC
Merkel-cell-carcinoma	C04.557.580.625.650.240.325	C04.557.580.625.650	ONCOLOGIC
Melanoma	C04.557.580.625.650.510	C04.557.580.625.650	ONCOLOGIC
Neurilemoma	C04.557.580.625.650.595	C04.557.580.625.650	ONCOLOGIC
Paraganglioma	C04.557.580.625.650.700	C04.557.580.625.650	ONCOLOGIC
Pheochromocytoma	C04.557.580.625.650.700.725	C04.557.580.625.650	ONCOLOGIC
Breast-neoplasms	C04.588.180	C04	ONCOLOGIC
Digestive-system-neoplasms	C04.588.274	C04	ONCOLOGIC
Colorectal-neoplasms	C04.588.274.476.411.307	C04.588.274	ONCOLOGIC
Stomach-neoplasms	C04.588.274.476.767	C04.588.274	ONCOLOGIC
Hepatocellular-carcinoma	C04.588.274.623.160	C04.588.274	ONCOLOGIC
Pancreatic-neoplasms	C04.588.274.761	C04.588.274	ONCOLOGIC
Laryngeal-neoplasms	C04.588.443.665.481	C04	ONCOLOGIC
Thyroid-neoplasms	C04.588.443.915	C04	ONCOLOGIC
Brain-neoplasms	C04.588.614.250.195	C04	ONCOLOGIC
Lung-neoplasms	C04.588.894.797.520	C04	ONCOLOGIC
Thymoma	C04.588.894.949.500	C04	ONCOLOGIC
Urogenital-neoplasms	C04.588.945	C04	ONCOLOGIC
Endometrial-neoplasms	C04.588.945.418.948.585	C04.588.945	ONCOLOGIC
Prostatic-neoplasms	C04.588.945.440.770	C04.588.945	ONCOLOGIC
Renal-cell-carcinoma	C04.588.945.947.535.160	C04.588.945	ONCOLOGIC
Leukoplakia	C04.834.512	C04	ONCOLOGIC
Musculoskeletal-diseases	C05	-	MUSCULOSKELETAL
Bone-diseases	C05.116	C05	MUSCULOSKELETAL
Osteochondrodysplasias	C05.116.099.708	C05.116	MUSCULOSKELETAL
Osteosclerosis	C05.116.099.708.702	C05.116.099.708	MUSCULOSKELETAL
Osteomyelitis	C05.116.165.495	C05.116	MUSCULOSKELETAL
Metabolic-bone-diseases	C05.116.198	C05.116	MUSCULOSKELETAL
Osteomalacia	C05.116.198.495	C05.116.198	MUSCULOSKELETAL
Osteoporosis	C05.116.198.579	C05.116.198	MUSCULOSKELETAL
Rickets	C05.116.198.816	C05.116.198	MUSCULOSKELETAL
Spinal-diseases	C05.116.900	C05.116	MUSCULOSKELETAL
Pathological-fractures	C21.866.404.374	C05.116	MUSCULOSKELETAL
Bone-age-abnormal	-	C05.116	MUSCULOSKELETAL
Foot-deformities	C05.330	C05	MUSCULOSKELETAL
Joint-diseases	C05.550	C05	MUSCULOSKELETAL
Arthralgia	C05.550.091	C05.550	MUSCULOSKELETAL
Arthritis	C05.550.114	C05.550	MUSCULOSKELETAL
Osteoarthritis	C05.550.114.606	C05.550.114	MUSCULOSKELETAL
Joint-instability	C05.550.521	C05.550	MUSCULOSKELETAL
Joint-limitations	C05.550.323	C05.550	MUSCULOSKELETAL
Muscular-diseases	C05.651	C05	MUSCULOSKELETAL
Rhabdomyolysis	C05.651.807	C05.651	MUSCULOSKELETAL
Myoglobinuria	C05.651.807.628	C05.651	MUSCULOSKELETAL
Tendinopathy	C05.651.869	C05.651	MUSCULOSKELETAL
Craniofacial-abnormalities	C05.660.207	C05	MUSCULOSKELETAL
Microcephaly	C05.660.207.620	C05.660.207	MUSCULOSKELETAL
Macrocephaly	-	C05.660.207	MUSCULOSKELETAL
Costochondral-junctions-abnormal	-	C05	MUSCULOSKELETAL
Digestive-system-diseases	C06	-	GASTROINTESTINAL
Biliary-tract-diseases	C06.130	C06	GASTROINTESTINAL
Cholestasis	C06.130.120.135	C06.130	GASTROINTESTINAL
Cholangitis	C06.130.120.200	C06.130	GASTROINTESTINAL
Cholelithiasis	C06.130.409	C06.130	GASTROINTESTINAL
Digestive-system-abnormalities	C06.198	C06	GASTROINTESTINAL
Gastrointestinal-diseases	C06.405	C06	GASTROINTESTINAL
Deglutition-disorders	C06.405.117.119	C06.405	GASTROINTESTINAL
Esophageal-varices	C06.405.117.240	C06.405	GASTROINTESTINAL
Gastroenteritis	C06.405.205	C06.405	GASTROINTESTINAL
Inguinal-hernia	C06.405.293.249.437	C06.405	GASTROINTESTINAL
Intestinal-obstruction	C06.405.469.531	C06.405	GASTROINTESTINAL
Gastrointestinal-hemorrhage	C23.550.414.788	C06.405	GASTROINTESTINAL
Hematemesis	C23.550.414.788.400	C23.550.414.788	GASTROINTESTINAL
Liver-diseases	C06.552	C06	GASTROINTESTINAL
Fatty-liver	C06.552.241	C06.552	GASTROINTESTINAL
Hepatitis	C06.552.380	C06.552	GASTROINTESTINAL
Liver-cirrhosis	C06.552.630	C06.552	GASTROINTESTINAL
Hepatic-hemorrhage	-	C06.552	GASTROINTESTINAL
Liver-enzymes-abnormal	-	C06.552	GASTROINTESTINAL
Hepatomegaly	C23.300.775.525	C06.552	GASTROINTESTINAL
Pancreatic-diseases	C06.689	C06	GASTROINTESTINAL
Pancreatitis	C06.689.750	C06.689	GASTROINTESTINAL
Abdominal-pain	C23.888.646.100	C06	GASTROINTESTINAL
Feeding-difficulties	C23.888.821.108	C06	GASTROINTESTINAL
Diarrhea	C23.888.821.214	C06	GASTROINTESTINAL
Hiccup	C23.888.821.578	C06	GASTROINTESTINAL
Vomiting	C23.888.821.937	C06	GASTROINTESTINAL
Respiratory-tract-diseases	C08	-	RESPIRATORY
Bronchial-diseases	C08.127	C08	RESPIRATORY
Asthma	C08.127.108	C08.127	RESPIRATORY
Lung-diseases	C08.381	C08	RESPIRATORY
Pulmonary-fibrosis	C08.381.483.620	C08.381	RESPIRATORY
Pneumonia	C08.381.677	C08.381	RESPIRATORY
Pulmonary-edema	C08.381.742	C08.381	RESPIRATORY
Pulmonary-hemorrhage	-	C08.381	RESPIRATORY
Pulmonary-hypoplasia	-	C08.381	RESPIRATORY
Respiration-disorders	C08.618	C08	RESPIRATORY
Hyperventilation	C08.618.501	C08.618	RESPIRATORY
Respiratory-insufficiency	C08.618.846	C08.618	RESPIRATORY
Tracheal-diseases	C08.907	C08	RESPIRATORY
Nervous-system-diseases	C10	-	NEUROLOGIC
Central-nervous-system-diseases	C10.228	C10	NEUROLOGIC
Brain-diseases	C10.228.140	C10.228	NEUROLOGIC
Basal-ganglia-diseases	C10.228.140.079	C10.228.140	NEUROLOGIC
Brain-edema	C10.228.140.187	C10.228.140	NEUROLOGIC
Encephalopathy	-	C10.228.140	NEUROLOGIC
Cerebrovascular-disorders	C10.228.140.300	C10.228.140	NEUROLOGIC
Intracranial-aneurysm	C10.228.140.300.510.200.450	C10.228.140.300	NEUROLOGIC
Intracranial-embolism-and-thrombosis	C10.228.140.300.525	C10.228.140.300	NEUROLOGIC
Intracranial-hemorrhages	C10.228.140.300.535	C10.228.140.300	NEUROLOGIC
Subdural-hematoma	C10.228.140.300.535.450.400	C10.228.140.300.535	NEUROLOGIC
Seizures	C10.228.140.490.631	C10.228.140	NEUROLOGIC
Headache-disorders	C10.228.140.546	C10.228.140	NEUROLOGIC
Hydrocephalus	C10.228.140.602	C10.228.140	NEUROLOGIC
Leukoencephalopathy	C10.314.450	C10.228.140	NEUROLOGIC
Cerebral-gliosis	C23.550.369	C10.228.140	NEUROLOGIC
Cerebellar-atrophy	-	C10.228.140	NEUROLOGIC
Cerebral-atrophy	-	C10.228.140	NEUROLOGIC
Cerebral-calcifications	-	C10.228.140	NEUROLOGIC
Cerebral-necrosis	-	C10.228.140	NEUROLOGIC
Corpus-callosum-hypoplasia	-	C10.228.140	NEUROLOGIC
Cortical-dysplasia	-	C10.228.140	NEUROLOGIC
Electroencephalogram-abnormal	-	C10.228.140	NEUROLOGIC
Movement-disorders	C10.228.662	C10.228	NEUROLOGIC
Choreatic-disorders	C10.228.662.150	C10.228.662	NEUROLOGIC
Dystonic-disorders	C10.228.662.300	C10.228.662	NEUROLOGIC
Parkinsonian-disorders	C10.228.662.600	C10.228.662	NEUROLOGIC
Lewy-body-disease	C10.228.662.600.200	C10.228.662.600	NEUROLOGIC
Dyskinesias	C10.597.350	C10.228.662	NEUROLOGIC
Athetosis	C10.597.350.110	C10.228.662	NEUROLOGIC
Bradykinesia	C10.597.350.400	C10.597.350	NEUROLOGIC
Tremor	C10.597.350.850	C10.228.662	NEUROLOGIC
Spinal-cord-diseases	C10.228.854	C10.228	NEUROLOGIC
Extrapyramidal-tract-signs	-	C10.228	NEUROLOGIC
Neuronal-lipopigments	-	C10.228	NEUROLOGIC
Neuronal-loss-and-lesions	-	C10.228	NEUROLOGIC
Porencephaly	-	C10.228	NEUROLOGIC
Cranial-nerve-diseases	C10.292	C10	NEUROLOGIC
Vocal-cord-paralysis	C10.292.887.800	C10.292	NEUROLOGIC
Neural-tube-defects	C10.500.680	C10	NEUROLOGIC
Neurodegenerative-diseases	C10.574	C10	NEUROLOGIC
Axonal-degeneration	C23.550.737	C10	NEUROLOGIC
Neurologic-manifestations	C10.597	C10	NEUROLOGIC
Neurogenic-bladder	C10.597.200	C10.597	NEUROLOGIC
Ataxia	C10.597.350.090	C10.597	NEUROLOGIC
Myoclonus	C10.597.350.500	C10.597	NEUROLOGIC
Gait-disorders	C10.597.404	C10.597	NEUROLOGIC
Neurobehavioral-manifestations	C10.597.606	C10.597	NEUROLOGIC
Catatonia	C10.597.606.115	C10.597.606	NEUROLOGIC
Language-disorders	C10.597.606.150.500	C10.597.606	NEUROLOGIC
Speech-disorders	C10.597.606.150.500.800	C10.597.606	NEUROLOGIC
Aphasia	C10.597.606.150.500.800.100	C10.597.606.150.500.800	NEUROLOGIC
Dysarthria	C10.597.606.150.500.800.150.200	C10.597.606.150.500.800	NEUROLOGIC
Confusion	C10.597.606.337	C10.597.606	NEUROLOGIC
Consciousness-disorders	C10.597.606.358	C10.597.606	NEUROLOGIC
Memory-disorders	C10.597.606.525	C10.597.606	NEUROLOGIC
Mental-retardation	C10.597.606.643	C10.597.606	NEUROLOGIC
Perceptual-disorders	C10.597.606.762	C10.597.606	NEUROLOGIC
Hallucinations	C10.597.606.762.300	C10.597.606.762	NEUROLOGIC
Developmental-delay	C10.597.606.881	C10	NEUROLOGIC
Apraxias	C10.597.606.881.350	C10.597.606	NEUROLOGIC
Psychomotor-agitation	C10.597.606.881.700	C10.597.606	NEUROLOGIC
Irritability	F01.470.047.110	C10.597.606	NEUROLOGIC
Lethargy	F02.830.855.796	C10.597.606	NEUROLOGIC
Neuromuscular-manifestations	C10.597.613	C10.597	NEUROLOGIC
Fasciculations	C10.597.613.250	C10.597.613	NEUROLOGIC
Muscle-hypertonia	C10.597.613.550	C10.597.613	NEUROLOGIC
Muscle-rigidity	C10.597.613.550.500	C10.597.613	NEUROLOGIC
Muscle-spasticity	C10.597.613.550.550	C10.597.613	NEUROLOGIC
Muscle-hypotonia	C10.597.613.575	C10.597.613	NEUROLOGIC
Muscle-weakness	C10.597.613.593	C10.597.613	NEUROLOGIC
Muscular-atrophy	C10.597.613.612	C10.597.613	NEUROLOGIC
Myotonia	C10.597.613.700	C10.597.613	NEUROLOGIC
Electromyography-abnormal	-	C10.597.613	NEUROLOGIC
Muscle-aching-and-stiffness	-	C10.597.613	NEUROLOGIC
Paralysis-Paresis	C10.597.622	C10.597	NEUROLOGIC
Reflexes-abnormal	C10.597.704	C10.597	NEUROLOGIC
Hyperreflexia	-	C10.597.704	NEUROLOGIC
Hyporeflexia	-	C10.597.704	NEUROLOGIC
Pyramidal-tract-signs	C10.597.704.400	C10.597.704	NEUROLOGIC
Hearing-disorders	C10.597.751.418	C10.597	NEUROLOGIC
Tinnitus	C10.597.751.418.670	C10.597.751.418	NEUROLOGIC
Olfaction-disorders	C10.597.751.600	C10.597	NEUROLOGIC
Vertigo	C10.597.951	C10.597	NEUROLOGIC
Voice-disorders	C10.597.975	C10.597	NEUROLOGIC
Postural-instability	-	C10.597	NEUROLOGIC
Stroke-like-episodes	-	C10.597	NEUROLOGIC
Peripheral-nervous-system-diseases	C10.668.829	C10	NEUROLOGIC
Polyneuropathies	C10.668.829.800	C10.668.829	NEUROLOGIC
Proprioception-impaired	-	C10.668.829	NEUROLOGIC
Sleep-disorders	C10.886	C10	NEUROLOGIC
Sleep-bruxism	C10.886.659.637	C10.886	NEUROLOGIC
Restless-legs-symptoms	C10.886.425.800.700	C10.597	NEUROLOGIC
Eye-diseases	C11	-	OPHTHALMOLOGIC
Conjunctivitis	C11.187.183	C11	OPHTHALMOLOGIC
Corneal-diseases	C11.204	C11	OPHTHALMOLOGIC
Blepharoptosis	C11.338.204	C11	OPHTHALMOLOGIC
Lens-diseases	C11.510	C11	OPHTHALMOLOGIC
Cataract	C11.510.245	C11.510	OPHTHALMOLOGIC
Ectopia-lentis	C11.510.598.373	C11.510	OPHTHALMOLOGIC
Glaucoma	C11.525.381	C11	OPHTHALMOLOGIC
Ocular-motility-disorders	C11.590	C11	OPHTHALMOLOGIC
Pathologic-nystagmus	C11.590.400	C11.590	OPHTHALMOLOGIC
Adies-like-pupils	C11.590.436.200	C11.590	OPHTHALMOLOGIC
Ophthalmoplegia	C11.590.472	C11.590	OPHTHALMOLOGIC
Strabismus	C11.590.810	C11.590	OPHTHALMOLOGIC
Optic-nerve-diseases	C11.640	C11	OPHTHALMOLOGIC
Papilledema	C11.640.710	C11.640	OPHTHALMOLOGIC
Orbital-diseases	C11.675	C11	OPHTHALMOLOGIC
Enophthalmos	C11.675.319	C11.675	OPHTHALMOLOGIC
Exophthalmos	C11.675.349	C11.675	OPHTHALMOLOGIC
Myopia	C11.744.636	C11	OPHTHALMOLOGIC
Retinal-diseases	C11.768	C11	OPHTHALMOLOGIC
Macular-degeneration	C11.768.585.439	C11.768	OPHTHALMOLOGIC
Uveal-diseases	C11.941	C11	OPHTHALMOLOGIC
Choroid-diseases	C11.941.160	C11.941	OPHTHALMOLOGIC
Gyrate-atrophy	C11.941.160.578	C11.941.160	OPHTHALMOLOGIC
Panuveitis	C11.941.879.780	C11.941	OPHTHALMOLOGIC
Vision-disorders	C11.966	C11	OPHTHALMOLOGIC
Color-vision-defects	C11.966.256	C11.966	OPHTHALMOLOGIC
Diplopia	C11.966.339	C11.966	OPHTHALMOLOGIC
Night-blindness	C11.966.671	C11.966	OPHTHALMOLOGIC
Photophobia	C11.966.741	C11.966	OPHTHALMOLOGIC
Electroretinography-abnormal	-	C11	OPHTHALMOLOGIC
Kayser-Fleischer-Ring	-	C11	OPHTHALMOLOGIC
Genitourinary-diseases	C12	-	GENITOURINARY
Male-genital-diseases	C12.294	C12	GENITOURINARY
Epididymitis	C12.294.199	C12.294	GENITOURINARY
Infertility-male	C12.294.365.700	C12.294	GENITOURINARY
Urogenital-abnormalities	C12.740.700	C12	GENITOURINARY
Cryptorchidism	C12.740.700.258	C12.740.700	GENITOURINARY
Hypospadias	C12.740.700.516	C12.740.700	GENITOURINARY
Urologic-diseases	C12.777	C12	GENITOURINARY
Hematuria	C12.777.295	C12.777	GENITOURINARY
Kidney-diseases	C12.777.419	C12.777	GENITOURINARY
Hydronephrosis	C12.777.419.307	C12.777.419	GENITOURINARY
Cystic-kidney-diseases	C12.777.419.403	C12.777.419	GENITOURINARY
Nephritis	C12.777.419.570	C12.777.419	GENITOURINARY
Nephrocalcinosis	C12.777.419.590	C12.777.419	GENITOURINARY
Renal-insufficiency	C12.777.419.780	C12.777.419	GENITOURINARY
Renal-fatty-infiltration	-	C12.777.419	GENITOURINARY
Creatinine-levels-abnormal	-	C12.777.419	GENITOURINARY
Uremia	C12.777.419.936	C12.777.419	GENITOURINARY
Urination-disorders	C12.777.934	C12.777	GENITOURINARY
Female-genital-diseases	C13.371	C12	GENITOURINARY
Ovarian-diseases	C13.371.056.630	C13.371	GENITOURINARY
Infertility-female	C13.371.365.700	C13.371	GENITOURINARY
Menstruation-disturbances	C23.550.568	C13.371	GENITOURINARY
Pregnancy-complications	C13.703	C13.371	GENITOURINARY
Cardiovascular-diseases	C14	-	CARDIOVASCULAR
Congenital-heart-defects	C14.240.400	C14	CARDIOVASCULAR
Heart-diseases	C14.280	C14	CARDIOVASCULAR
Arrhythmia	C14.280.067	C14.280	CARDIOVASCULAR
Cardiomyopathy	C14.280.238	C14.280	CARDIOVASCULAR
Cardiorespiratory-arrest	C14.280.383	C14	CARDIOVASCULAR
Heart-valve-diseases	C14.280.484	C14.280	CARDIOVASCULAR
Vascular-diseases	C14.907	C14	CARDIOVASCULAR
Arteriosclerosis	C14.907.137.126	C14.907	CARDIOVASCULAR
Embolism-and-thrombosis	C14.907.355	C14.907	CARDIOVASCULAR
Hypertension	C14.907.489	C14.907	CARDIOVASCULAR
Hypotension	C14.907.514	C14.907	CARDIOVASCULAR
Orthostatic-hypotension	C14.907.514.482	C14.907.514	CARDIOVASCULAR
Myocardial-ischemia	C14.907.553.470	C14.907	CARDIOVASCULAR
Coronary-disease	C14.907.553.470.250	C14.907.553.470	CARDIOVASCULAR
Peripheral-vascular-diseases	C14.907.617	C14.907	CARDIOVASCULAR
Telangiectasis	C14.907.823	C14.907	CARDIOVASCULAR
Blood-circulation-disorder	-	C14	CARDIOVASCULAR
Hematologic-diseases	C15.378	-	HEMATOLOGIC
Anemia	C15.378.071	C15.378	HEMATOLOGIC
Blood-coagulation-disorders	C15.378.100	C15.378	HEMATOLOGIC
Purpura	C15.378.100.802	C15.378.100	HEMATOLOGIC
Petechiae	-	C15.378.100	HEMATOLOGIC
Blood-platelet-disorders	C15.378.140	C15.378	HEMATOLOGIC
Thrombocytopenia	C15.378.140.855	C15.378.140	HEMATOLOGIC
Thrombocytosis	C15.378.140.860	C15.378.140	HEMATOLOGIC
Blood-protein-disorders	C15.378.147	C15.378	HEMATOLOGIC
Dysgammaglobulinemia	C15.378.147.333	C15.378.147	HEMATOLOGIC
Hypergammaglobulinemia	C15.378.147.542	C15.378.147	HEMATOLOGIC
Hypoalbuminemia	C15.378.147.607.500	C15.378.147	HEMATOLOGIC
Hyperalbuminemia	-	C15.378.147	HEMATOLOGIC
Bone-marrow-diseases	C15.378.190	C15.378	HEMATOLOGIC
Hemoglobin-levels-abnormal	C15.378.420	C15.378	HEMATOLOGIC
Leukocyte-disorders	C15.378.553	C15.378	HEMATOLOGIC
Eosinophilia	C15.378.553.231	C15.378.553	HEMATOLOGIC
Leukocytosis	C15.378.553.475	C15.378.553	HEMATOLOGIC
Leukopenia	C15.378.553.546	C15.378.553	HEMATOLOGIC
Lymphopenia	C15.378.553.546.605	C15.378.553.546	HEMATOLOGIC
Lymphocytes-abnormal	-	C15.378.553	HEMATOLOGIC
Methemoglobinemia	C15.378.619	C15.378	HEMATOLOGIC
Pancytopenia	C15.378.700	C15.378	HEMATOLOGIC
Polycythemia	C15.378.738	C15.378	HEMATOLOGIC
Reticulocytosis	C23.888.760	C15.378	HEMATOLOGIC
Acanthocytosis	-	C15.378	HEMATOLOGIC
Spherocytosis	-	C15.378	HEMATOLOGIC
Lymphatic-diseases	C15.604	C15.378	HEMATOLOGIC
Granuloma	C15.604.515.292	C15.604	HEMATOLOGIC
Skin-diseases	C17.800	-	DERMATOLOGIC
Gynecomastia	C17.800.090.875	C17.800	DERMATOLOGIC
Dermatitis	C17.800.174	C17.800	DERMATOLOGIC
Hair-diseases	C17.800.329	C17.800	DERMATOLOGIC
Hirsutism	C17.800.329.750	C17.800.329	DERMATOLOGIC
Hypertrichosis	C17.800.329.875	C17.800.329	DERMATOLOGIC
Hypotrichosis	C17.800.329.937	C17.800.329	DERMATOLOGIC
Alopecia	C17.800.329.937.122	C17.800.329	DERMATOLOGIC
Nail-diseases	C17.800.529	C17.800	DERMATOLOGIC
Photosensitivity-disorders	C17.800.600	C17.800	DERMATOLOGIC
Pigmentation-disorders	C17.800.621	C17.800	DERMATOLOGIC
Cafe-au-lait-spots	C17.800.621.250	C17.800.621	DERMATOLOGIC
Hyperpigmentation	C17.800.621.430	C17.800.621	DERMATOLOGIC
Hypopigmentation	C17.800.621.440	C17.800.621	DERMATOLOGIC
Prurigo	C17.800.674	C17.800	DERMATOLOGIC
Pruritus	C17.800.685	C17.800	DERMATOLOGIC
Xanthomatosis	C17.800.849.929	C17.800	DERMATOLOGIC
Psoriasis	C17.800.859.675	C17.800	DERMATOLOGIC
Blistering	C17.800.865.187	C17.800	DERMATOLOGIC
Sweat-gland-diseases	C17.800.946	C17.800	DERMATOLOGIC
Hyperhidrosis	C17.800.946.350	C17.800.946	DERMATOLOGIC
Hypohidrosis	C17.800.946.370	C17.800.946	DERMATOLOGIC
Paleness	C23.888.885.500	C17.800	DERMATOLOGIC
Metabolic-diseases	C18.452	-	METABOLIC
Acid-base-imbalance	C18.452.076	C18.452	METABOLIC
Acidosis	C18.452.076.176	C18.452.076	METABOLIC
Ketosis	C18.452.076.176.652	C18.452.076	METABOLIC
Alkalosis	C18.452.076.354	C18.452.076	METABOLIC
Hypoketosis	-	C18.452.076	METABOLIC
Metabolic-brain-diseases	C18.452.100	C18.452	METABOLIC
Galactosemias	C18.452.100.100.320	C18.452.100	METABOLIC
Reye-like-symptoms	C18.452.100.780	C18.452.100	METABOLIC
Dyslipidemias	C18.452.339	C18.452	METABOLIC
Hyperlipidemia	C18.452.339.500	C18.452.339	METABOLIC
Hypercholesterolemia	C18.452.339.500.396	C18.452.339.500	METABOLIC
Hypertriglyceridemia	C18.452.339.500.851	C18.452.339.500	METABOLIC
Hypercholestanolemia	-	C18.452.339	METABOLIC
Hypocholesterolemia	-	C18.452.339	METABOLIC
Hypolipidemia	-	C18.452.339	METABOLIC
Glucose-metabolism-disorders	C18.452.394	C18.452	METABOLIC
Diabetes-mellitus	C18.452.394.750	C18.452.394	METABOLIC
Glycosuria	C18.452.394.937	C18.452.394	METABOLIC
Hyperglycemia	C18.452.394.952	C18.452.394	METABOLIC
Hyperinsulinism	C18.452.394.968	C18.452.394	METABOLIC
Hypoglycemia	C18.452.394.984	C18.452.394	METABOLIC
Hyperammonemia	C18.452.413	C18.452	METABOLIC
Hyperbilirubinemia	C18.452.429	C18.452	METABOLIC
Hyperoxaluria	C18.452.497	C18.452	METABOLIC
Hyperuricemia	C18.452.506	C18.452	METABOLIC
Hypouricemia	-	C18.452	METABOLIC
Hypouremia	-	C18.452	METABOLIC
Hemochromatosis	C18.452.565.500.480	C18.452	METABOLIC
Aminoacid-levels-abnormal	C18.452.648.066	C18.452	METABOLIC
Aminoaciduria	C18.452.648.066.210	C18.452	METABOLIC
Phosphorus-metabolism-disorders	C18.452.750	C18.452	METABOLIC
Hypophosphatemia	C18.452.750.400	C18.452.750	METABOLIC
Hyperphosphatemia	-	C18.452.750	METABOLIC
Water-electrolyte-imbalance	C18.452.950	C18.452	METABOLIC
Dehydration	C18.452.950.179	C18.452.950	METABOLIC
Hypercalcemia	C18.452.950.340	C18.452.950	METABOLIC
Hyperkalemia	C18.452.950.396	C18.452.950	METABOLIC
Hypernatremia	C18.452.950.452	C18.452.950	METABOLIC
Hypocalcemia	C18.452.950.509	C18.452.950	METABOLIC
Hypokalemia	C18.452.950.565	C18.452.950	METABOLIC
Hyponatremia	C18.452.950.620	C18.452.950	METABOLIC
Salt-wasting	-	C18.452.950	METABOLIC
Obesity	C18.654.726.500	C18.452	METABOLIC
Acylcarnitine-profile-abnormal	-	C18.452	METABOLIC
Acylglycine-profile-abnormal	-	C18.452	METABOLIC
Carnitine-levels-abnormal	-	C18.452	METABOLIC
Creatine-levels-abnormal	-	C18.452	METABOLIC
Fatty-acids-abnormal	-	C18.452	METABOLIC
Guanidinoacetate-levels-abnormal	-	C18.452	METABOLIC
Heme-levels-abnormal	-	C18.452	METABOLIC
Hyperferricemia	-	C18.452	METABOLIC
Hyperreninemia	-	C18.452	METABOLIC
Hyporeninemia	-	C18.452	METABOLIC
Nucleoside-levels-abnormal	-	C18.452	METABOLIC
Porphyrins-abnormal	-	C18.452	METABOLIC
Porphyrinuria	-	C18.452	METABOLIC
Sulfur-metabolites-abnormal	-	C18.452	METABOLIC
Organic-acids-abnormal	C18.452.OA	C18.452	METABOLIC
Cystathioninuria	-	C18.452.OA	METABOLIC
Dicarboxylic-aciduria	-	C18.452.OA	METABOLIC
Ethylmalonic-aciduria	-	C18.452.OA	METABOLIC
Glutaric-aciduria	-	C18.452.OA	METABOLIC
Hydroxyisovaleric-aciduria	-	C18.452.OA	METABOLIC
Hydroxypropionic-aciduria	-	C18.452.OA	METABOLIC
Hyperglycerolemia	-	C18.452.OA	METABOLIC
Methylglutaconic-aciduria	-	C18.452.OA	METABOLIC
Methylmalonic-aciduria	-	C18.452.OA	METABOLIC
Orotic-aciduria	-	C18.452.OA	METABOLIC
TCA-intermediates-elevated	-	C18.452.OA	METABOLIC
Tiglylglycinuria	-	C18.452.OA	METABOLIC
Uraciluria	-	C18.452.OA	METABOLIC
Endocrine-system-diseases	C19	-	ENDOCRINOLOGIC
Adrenal-gland-diseases	C19.053	C19	ENDOCRINOLOGIC
Adrenal-gland-neoplasms	C19.053.347	C19.053	ENDOCRINOLOGIC
Adrenocortical-adenoma	C19.053.347.500.500	C19.053.347	ENDOCRINOLOGIC
Adrenocortical-carcinoma	C19.053.347.500.750	C19.053.347	ENDOCRINOLOGIC
Adrenal-hyperplasia	C19.053.440	C19.053	ENDOCRINOLOGIC
Adrenal-insufficiency	C19.053.500	C19.053	ENDOCRINOLOGIC
Hypoaldosteronism	C19.053.500.480	C19.053.500	ENDOCRINOLOGIC
Hypocortisolism	-	C19.053.500	ENDOCRINOLOGIC
Adrenocortical-hyperfunction	C19.053.800	C19.053	ENDOCRINOLOGIC
Hypercortisolism	C19.053.800.367	C19.053.800	ENDOCRINOLOGIC
Hyperaldosteronism	C19.053.800.604	C19.053.800	ENDOCRINOLOGIC
Cortisol-derivatives-abnormal	-	C19.053	ENDOCRINOLOGIC
Corticosterone-levels-abnormal	-	C19.053	ENDOCRINOLOGIC
Gonadal-disorders	C19.391	C19	ENDOCRINOLOGIC
Hypogonadism	C19.391.482	C19.391	ENDOCRINOLOGIC
Sexual-infantilism	C19.391.482.814	C19.391.482	ENDOCRINOLOGIC
Puberty-delayed	C19.391.690	C19.391	ENDOCRINOLOGIC
Precocious-puberty	C19.391.693	C19.391	ENDOCRINOLOGIC
Sex-differentiation-disorders	C19.391.775	C19.391	ENDOCRINOLOGIC
Hermaphroditism	C19.391.775.316	C19.391.775	ENDOCRINOLOGIC
Hyperandrogenism	C19.391.775.370	C19.391.775	ENDOCRINOLOGIC
Hypoandrogenism	-	C19.391	ENDOCRINOLOGIC
Parathyroid-diseases	C19.642	C19	ENDOCRINOLOGIC
Hyperparathyroidism	C19.642.355	C19.642	ENDOCRINOLOGIC
Hypoparathyroidism	C19.642.482	C19.642	ENDOCRINOLOGIC
Pituitary-diseases	C19.700	C19	ENDOCRINOLOGIC
Diabetes-insipidus	C19.700.159	C19.700	ENDOCRINOLOGIC
Hyperpituitarism	C19.700.355	C19.700	ENDOCRINOLOGIC
Thyroid-diseases	C19.874	C19	ENDOCRINOLOGIC
Goiter	C19.874.283	C19.874	ENDOCRINOLOGIC
Hyperthyroidism	C19.874.397	C19.874	ENDOCRINOLOGIC
Hypothyroidism	C19.874.482	C19.874	ENDOCRINOLOGIC
Myxedema	C19.874.482.638	C19.874.482	ENDOCRINOLOGIC
Immune-system-diseases	C20	-	IMMUNOLOGIC
Autoimmune-diseases	C20.111	C20	IMMUNOLOGIC
Immune-deficiency	C20.673	C20	IMMUNOLOGIC
Infections	C01.539	C20	IMMUNOLOGIC
Psychiatric-disorders	F00	-	PSYCHIATRIC
Behavioral-symptoms	F01.145.126	F00	PSYCHIATRIC
Aggression	F01.145.126.125	F01.145.126	PSYCHIATRIC
Self-injurious-behavior	F01.145.126.980	F01.145.126	PSYCHIATRIC
Feeding-behavior	F01.145.407	F01.145.126	PSYCHIATRIC
Appetite-increased	F02.830.071	F00	PSYCHIATRIC
Mental-disorders	F03	F00	PSYCHIATRIC
Anxiety-disorders	F03.080	F03	PSYCHIATRIC
Obsessive-compulsive-disorder	F03.080.600	F03.080	PSYCHIATRIC
Dementia	F03.087.400	F03	PSYCHIATRIC
Eating-disorders	F03.375	F03	PSYCHIATRIC
Impulse-control-disorders	F03.500	F03	PSYCHIATRIC
Autistic-disorder	F03.550.325.125	F03	PSYCHIATRIC
Mood-disorders	F03.600	F03	PSYCHIATRIC
Bipolar-disorder	F03.600.150.150	F03.600	PSYCHIATRIC
Depressive-disorder	F03.600.300	F03.600	PSYCHIATRIC
Borderline-personality-disorder	F03.675.100	F03	PSYCHIATRIC
Schizophrenia-and-psychotic-disorders	F03.700	F03	PSYCHIATRIC
Psychotic-disorders	F03.700.675	F03.700	PSYCHIATRIC
Schizophrenia	F03.700.750	F03.700	PSYCHIATRIC
Substance-related-disorders	F03.900	F03	PSYCHIATRIC
Body-temperature-changes	C23.888.119	-	MISCELLANEOUS
Fever	C23.888.119.344	C23.888.119	MISCELLANEOUS
Hypothermia	C23.888.119.565	C23.888.119	MISCELLANEOUS
Cachexia	C23.888.144.243.963.500.500	-	MISCELLANEOUS
Cutaneous-flushing	C23.888.388	-	MISCELLANEOUS
Cyanosis	C23.888.248	-	MISCELLANEOUS
Edema	C23.888.277	-	MISCELLANEOUS
Exercise-intolerance	C23.888.369	-	MISCELLANEOUS
Splenomegaly	C23.300.775.750	-	MISCELLANEOUS
Growth-disorders	C23.550.393	-	MISCELLANEOUS
Failure-to-thrive	C23.550.393.225	C23.550.393	MISCELLANEOUS
Growth-deficiency	C23.550.393.450	C23.550.393	MISCELLANEOUS
Growth-accelerated	-	C23.550.393	MISCELLANEOUS
Tooth-abnormalities	C07.650.800	-	MISCELLANEOUS
Salivary-gland-diseases	C07.465.815	-	MISCELLANEOUS
Sialorrhea	C07.465.815.815	C07.465.815	MISCELLANEOUS
Xerostomia	C07.465.815.929	C07.465.815	MISCELLANEOUS
Dysmorphism-and-abnormalities	C16.131	-	MISCELLANEOUS
Altitude-dependence	-	-	MISCELLANEOUS
Energy-expenditure-abnormal	-	-	MISCELLANEOUS
Mitochondria-abnormal	-	-	MISCELLANEOUS
Odors	G03.230.480	-	MISCELLANEOUS
Thermogenesis-impaired	G07.315.232.778	-	MISCELLANEOUS
Alkaline-phosphatase-abnormal	-	-	MISCELLANEOUS
Alpha-fetoprotein-abnormal	-	-	MISCELLANEOUS
GABA-levels-abnormal	-	-	MISCELLANEOUS
Catecholamine-levels-abnormal	-	-	MISCELLANEOUS
Ceruloplasmin-levels-abnormal	-	-	MISCELLANEOUS
Copper-levels-abnormal	-	-	MISCELLANEOUS
Creatine-kinase-abnormal	-	-	MISCELLANEOUS
AKDH-deficiency	-	-	MISCELLANEOUS
BCKDH-deficiency	-	-	MISCELLANEOUS
GCC-deficiency	-	-	MISCELLANEOUS
MCC-deficiency	-	-	MISCELLANEOUS
PCC-deficiency	-	-	MISCELLANEOUS
PDH-deficiency	-	-	MISCELLANEOUS
RCCI-deficiency	-	-	MISCELLANEOUS
RCCII-deficiency	-	-	MISCELLANEOUS
RCCIII-deficiency	-	-	MISCELLANEOUS
RCCIV-deficiency	-	-	MISCELLANEOUS
RCCV-deficiency	-	-	MISCELLANEOUS
Carbamylglutamate-responsive	-	-	MISCELLANEOUS
Carnitine-responsive	-	-	MISCELLANEOUS
Creatine-responsive	-	-	MISCELLANEOUS
Vitamin-responsive	-	-	MISCELLANEOUS
