# Supplementary material for: Mapping Gene Associations in Human Mitochondria using Clinical Disease Phenotypes
Source: PLoS Comput Biol. 2009 Apr 24;5(4):e1000374. doi: 10.1371/journal.pcbi.1000374 (PMC2668170; doi:10.1371/journal.pcbi.1000374)
Supplement: Table S3 — 9,407 annotated gene-feature associations (1.90 MB XLS) [file pcbi.1000374.s006.xls]

## Sheet: TableS3
GENE NAME	GENE ENSEMBL	OMIM DISEASE ID	PHENOTYPIC FEATURE	PHENOTYPE ANNOTATION	CLINICAL CATEGORY(CC)	PMID	HYPERNYM GENE-FEATURE PAIR
AASS	ENSG00000008311	238700	Alkaline-phosphatase-abnormal	elevated	MISCELLANEOUS	6015890	-
AASS	ENSG00000008311	238700	Aminoacid-levels-abnormal	elevated-lysine;elevated-arginine;CSF;blood;hyperlysinemia	METABOLIC	6015890;10775527;5796356	-
AASS	ENSG00000008311	238700	Aminoaciduria	lysinuria;argininuria;cystinuria;ornithinuria;saccharopinuria	METABOLIC	5796356;6015890;10775527	-
AASS	ENSG00000008311	238700	Brain-diseases	-	NEUROLOGIC	#6015890	+
AASS	ENSG00000008311	238700	Central-nervous-system-diseases	-	NEUROLOGIC	#6015890	+
AASS	ENSG00000008311	238700	Consciousness-disorders	coma	NEUROLOGIC	6015890	-
AASS	ENSG00000008311	238700	Dehydration	-	METABOLIC	6015890	-
AASS	ENSG00000008311	238700	Developmental-delay	psychomotor-delay	NEUROLOGIC	6015890	-
AASS	ENSG00000008311	238700	Digestive-system-diseases	-	GASTROINTESTINAL	#6015890	+
AASS	ENSG00000008311	238700	Electroencephalogram-abnormal	diffuse	NEUROLOGIC	6015890	-
AASS	ENSG00000008311	238700	Fatty-liver	Histology-findings;slight;hepatic-fatty-infiltration	GASTROINTESTINAL	6015890	-
AASS	ENSG00000008311	238700	Feeding-difficulties	-	GASTROINTESTINAL	6015890	-
AASS	ENSG00000008311	238700	Growth-deficiency	-	MISCELLANEOUS	6015890	-
AASS	ENSG00000008311	238700	Growth-disorders	-	MISCELLANEOUS	#6015890	+
AASS	ENSG00000008311	238700	Hyperammonemia	ammonia-levels-elevated	METABOLIC	6015890	-
AASS	ENSG00000008311	238700	Lethargy	apathy	NEUROLOGIC	6015890	-
AASS	ENSG00000008311	238700	Liver-diseases	-	GASTROINTESTINAL	#6015890	+
AASS	ENSG00000008311	238700	Liver-enzymes-abnormal	ALT-elevated	GASTROINTESTINAL	6015890	-
AASS	ENSG00000008311	238700	Mental-retardation	mentally-slow	NEUROLOGIC	5796356	-
AASS	ENSG00000008311	238700	Metabolic-diseases	-	METABOLIC	#6015890;#10775527;#5796356	+
AASS	ENSG00000008311	238700	Muscle-hypertonia	-	NEUROLOGIC	6015890	-
AASS	ENSG00000008311	238700	Nervous-system-diseases	-	NEUROLOGIC	#6015890;#5796356	+
AASS	ENSG00000008311	238700	Neurobehavioral-manifestations	-	NEUROLOGIC	#6015890;#5796356	+
AASS	ENSG00000008311	238700	Neurologic-manifestations	-	NEUROLOGIC	#6015890;#5796356	+
AASS	ENSG00000008311	238700	Neuromuscular-manifestations	-	NEUROLOGIC	#6015890	+
AASS	ENSG00000008311	238700	Vomiting	-	GASTROINTESTINAL	6015890	-
AASS	ENSG00000008311	238700	Water-electrolyte-imbalance	-	METABOLIC	#6015890	+
AASS	ENSG00000008311	268700	Aminoaciduria	lysinuria;citrullinuria;histidinuria;saccharopinuria	METABOLIC	5690339;5018656	-
AASS	ENSG00000008311	268700	Brain-diseases	-	NEUROLOGIC	#5690339	+
AASS	ENSG00000008311	268700	Central-nervous-system-diseases	-	NEUROLOGIC	#5690339	+
AASS	ENSG00000008311	268700	Electroencephalogram-abnormal	-	NEUROLOGIC	5690339	-
AASS	ENSG00000008311	268700	Growth-deficiency	short-stature	MISCELLANEOUS	5690339	-
AASS	ENSG00000008311	268700	Growth-disorders	-	MISCELLANEOUS	#5690339	+
AASS	ENSG00000008311	268700	Mental-retardation	moderately	NEUROLOGIC	5690339	-
AASS	ENSG00000008311	268700	Metabolic-diseases	-	METABOLIC	#5690339;#5018656	+
AASS	ENSG00000008311	268700	Muscle-spasticity	spastic-diplegia	NEUROLOGIC	5018656	-
AASS	ENSG00000008311	268700	Nervous-system-diseases	-	NEUROLOGIC	#5690339;#5018656	+
AASS	ENSG00000008311	268700	Neurobehavioral-manifestations	-	NEUROLOGIC	#5690339	+
AASS	ENSG00000008311	268700	Neurologic-manifestations	-	NEUROLOGIC	#5690339;#5018656	+
AASS	ENSG00000008311	268700	Neuromuscular-manifestations	-	NEUROLOGIC	#5018656	+
AASS	ENSG00000008311	268700	Paralysis-Paresis	spastic-diplegia	NEUROLOGIC	5018656	-
ABAT	ENSG00000183044	137150	Aminoaciduria	elevated-histidine;elevated-alanine	METABOLIC	10407778	-
ABAT	ENSG00000183044	137150	Brain-diseases	-	NEUROLOGIC	#10407778;#6148708;#9746906	+
ABAT	ENSG00000183044	137150	Central-nervous-system-diseases	-	NEUROLOGIC	#10407778;#6148708;#9746906	+
ABAT	ENSG00000183044	137150	Cerebellar-atrophy	MRI-findings;cerebellar-hypoplasia;cerebellar-atrophy	NEUROLOGIC	10407778	-
ABAT	ENSG00000183044	137150	Corpus-callosum-hypoplasia	MRI-findings;corpus-callosum-agenesis	NEUROLOGIC	10407778	-
ABAT	ENSG00000183044	137150	Cortical-dysplasia	gyration-abnormal;hemispheres	NEUROLOGIC	10407778	-
ABAT	ENSG00000183044	137150	Developmental-delay	psychomotor-retardation	NEUROLOGIC	6148708;10407778;9746906	-
ABAT	ENSG00000183044	137150	Diarrhea	-	GASTROINTESTINAL	10407778	-
ABAT	ENSG00000183044	137150	Digestive-system-diseases	-	GASTROINTESTINAL	#10407778;#6148708	+
ABAT	ENSG00000183044	137150	Dysmorphism-and-abnormalities	facial-dysmorphism;retrognathia;down-slanting-eyes;lambdoid-sutures	MISCELLANEOUS	10407778	-
ABAT	ENSG00000183044	137150	Electroencephalogram-abnormal	burst-suppression-patterns	NEUROLOGIC	10407778	-
ABAT	ENSG00000183044	137150	Eye-diseases	-	OPHTHALMOLOGIC	#10407778	+
ABAT	ENSG00000183044	137150	Feeding-difficulties	-	GASTROINTESTINAL	10407778	-
ABAT	ENSG00000183044	137150	GABA-levels-abnormal	GABA-levels-increased;gamma-aminobutyric-acid-elevated;GABA-conjugates-elevated	MISCELLANEOUS	10407778;9746906	-
ABAT	ENSG00000183044	137150	Growth-accelerated	growth-hormone-levels-abnormal;plasma-growth-hormone-levels-increased	MISCELLANEOUS	6148708;10407778	-
ABAT	ENSG00000183044	137150	Growth-disorders	-	MISCELLANEOUS	#6148708;#10407778	+
ABAT	ENSG00000183044	137150	Hyperbilirubinemia	-	METABOLIC	10407778	-
ABAT	ENSG00000183044	137150	Hyperreflexia	clonus;deep-tendon-reflexes-abnormal	NEUROLOGIC	6148708;10407778;9746906	-
ABAT	ENSG00000183044	137150	Hyperventilation	tachypnea	RESPIRATORY	10407778	-
ABAT	ENSG00000183044	137150	Immune-system-diseases	-	IMMUNOLOGIC	#10407778	+
ABAT	ENSG00000183044	137150	Infections	otitis-media	IMMUNOLOGIC	10407778	-
ABAT	ENSG00000183044	137150	Irritability	high-pitched-cry;crying;irritable	NEUROLOGIC	10407778;9746906	-
ABAT	ENSG00000183044	137150	Lethargy	-	NEUROLOGIC	10407778;9746906	-
ABAT	ENSG00000183044	137150	Leukoencephalopathy	leukodystrophy	NEUROLOGIC	6148708	-
ABAT	ENSG00000183044	137150	Liver-diseases	-	GASTROINTESTINAL	#6148708	+
ABAT	ENSG00000183044	137150	Liver-enzymes-abnormal	liver-gamma-aminobutyric-acid-transaminase-deficient;liver-GABA-transaminase-deficient	GASTROINTESTINAL	6148708	-
ABAT	ENSG00000183044	137150	Mental-retardation	-	NEUROLOGIC	6148708	-
ABAT	ENSG00000183044	137150	Metabolic-diseases	-	METABOLIC	#10407778;#6148708	+
ABAT	ENSG00000183044	137150	Muscle-hypotonia	hypotonia	NEUROLOGIC	6148708;10407778;9746906	-
ABAT	ENSG00000183044	137150	Myoclonus	myoclonic-jerks;head;arm;leg	NEUROLOGIC	10407778	-
ABAT	ENSG00000183044	137150	Nervous-system-diseases	-	NEUROLOGIC	#10407778;#6148708;#9746906	+
ABAT	ENSG00000183044	137150	Neurobehavioral-manifestations	-	NEUROLOGIC	#10407778;#9746906;#6148708	+
ABAT	ENSG00000183044	137150	Neurologic-manifestations	-	NEUROLOGIC	#6148708;#10407778;#9746906	+
ABAT	ENSG00000183044	137150	Neuromuscular-manifestations	-	NEUROLOGIC	#6148708;#10407778;#9746906	+
ABAT	ENSG00000183044	137150	Organic-acids-abnormal	gamma-aminobutyric-acid;homocarnosine	METABOLIC	6148708	-
ABAT	ENSG00000183044	137150	Pyramidal-tract-signs	extensor-plantar-response;babinski-sign	NEUROLOGIC	10407778	-
ABAT	ENSG00000183044	137150	Reflexes-abnormal	-	NEUROLOGIC	#6148708;#10407778;#9746906	+
ABAT	ENSG00000183044	137150	Respiration-disorders	-	RESPIRATORY	#10407778	+
ABAT	ENSG00000183044	137150	Respiratory-tract-diseases	-	RESPIRATORY	#10407778	+
ABAT	ENSG00000183044	137150	Seizures	convulsions;chewing-movements;bicycling-movements	NEUROLOGIC	10407778;9746906	-
ABAT	ENSG00000183044	137150	Vision-disorders	no-response-to-light;non-reactive-pupils	OPHTHALMOLOGIC	10407778	-
ABAT	ENSG00000183044	209850	Autistic-disorder	autism;susceptibility	PSYCHIATRIC	15830322;15689451;11481586	-
ABAT	ENSG00000183044	209850	Behavioral-symptoms	repetitive-behavior;stereotyped-behavior	PSYCHIATRIC	15830322;15689451;11481586	-
ABAT	ENSG00000183044	209850	Developmental-delay	language-delay;neurodevelopmental-disorder	NEUROLOGIC	11481586;15689451;15830322	-
ABAT	ENSG00000183044	209850	Mental-disorders	-	PSYCHIATRIC	#15830322;#15689451;#11481586	+
ABAT	ENSG00000183044	209850	Nervous-system-diseases	-	NEUROLOGIC	#11481586;#15689451;#15830322	+
ABAT	ENSG00000183044	209850	Psychiatric-disorders	-	PSYCHIATRIC	#15830322;#15689451;#11481586	+
ABCB7	ENSG00000131269	301310	Anemia	hypochromic;microcytic;sideroblastic;pappenheimer-bodies	HEMATOLOGIC	4045952;11050011;11843825;11118249;10196363	-
ABCB7	ENSG00000131269	301310	Arthritis	-	MUSCULOSKELETAL	#11118249	+
ABCB7	ENSG00000131269	301310	Ataxia	cerebellar-ataxia;spinocerebellar-ataxia;non-progressive;dysdiadochokinesia;dysmetria;incoordination;congenital;finger-nose-ataxia	NEUROLOGIC	4045952;10196363;11050011;11118249;11843825	-
ABCB7	ENSG00000131269	301310	Bone-marrow-diseases	ring-sideroblasts;imperfect-ring-forms	HEMATOLOGIC	11118249;11843825;4045952;10196363	-
ABCB7	ENSG00000131269	301310	Brain-diseases	-	NEUROLOGIC	#11050011;#11118249	+
ABCB7	ENSG00000131269	301310	Central-nervous-system-diseases	-	NEUROLOGIC	#11050011;#11118249;#11843825;#4045952	+
ABCB7	ENSG00000131269	301310	Cerebellar-atrophy	cerebellar-hypoplasia;pons-atrophy;medulla-atrophy;brain-stem-atrophy;cerebellar-atrophy	NEUROLOGIC	11050011;11118249	-
ABCB7	ENSG00000131269	301310	Cranial-nerve-diseases	cranial-nerve-palsy;abducens-palsy;facial-palsy	NEUROLOGIC	11118249	-
ABCB7	ENSG00000131269	301310	Dementia	moderate	PSYCHIATRIC	11118249	-
ABCB7	ENSG00000131269	301310	Developmental-delay	psychomotor-regression	NEUROLOGIC	11050011	-
ABCB7	ENSG00000131269	301310	Diplopia	double-vision;binocular-vision-abnormal	OPHTHALMOLOGIC	11118249	-
ABCB7	ENSG00000131269	301310	Dysarthria	-	NEUROLOGIC	11050011;11118249;11843825;4045952	-
ABCB7	ENSG00000131269	301310	Dyskinesias	dysdiadochokinesia;bilateral	NEUROLOGIC	11118249	-
ABCB7	ENSG00000131269	301310	Eye-diseases	-	OPHTHALMOLOGIC	#11118249;#11050011;#11843825	+
ABCB7	ENSG00000131269	301310	Fasciculations	perioral	NEUROLOGIC	11118249	-
ABCB7	ENSG00000131269	301310	Gait-disorders	gait-abnormalities	NEUROLOGIC	11118249;11843825;4045952	-
ABCB7	ENSG00000131269	301310	Growth-deficiency	-	MISCELLANEOUS	11050011	-
ABCB7	ENSG00000131269	301310	Growth-disorders	-	MISCELLANEOUS	#11050011	+
ABCB7	ENSG00000131269	301310	Hematologic-diseases	-	HEMATOLOGIC	#4045952;#11050011;#11843825;#11118249;#10196363	+
ABCB7	ENSG00000131269	301310	Hemoglobin-levels-abnormal	hemoglobin-deficiency	HEMATOLOGIC	11050011;11843825;11118249	-
ABCB7	ENSG00000131269	301310	Hyperreflexia	brisk-deep-tendon-reflexes	NEUROLOGIC	11118249;11843825;4045952	-
ABCB7	ENSG00000131269	301310	Hyporeflexia	hypoactive;deep-tendon-reflexes-abnormal	NEUROLOGIC	11050011	-
ABCB7	ENSG00000131269	301310	Joint-diseases	arthropathy;joint-problems	MUSCULOSKELETAL	11118249	-
ABCB7	ENSG00000131269	301310	Mental-disorders	-	PSYCHIATRIC	#11118249	+
ABCB7	ENSG00000131269	301310	Metabolic-diseases	-	METABOLIC	#11050011;#4045952	+
ABCB7	ENSG00000131269	301310	Movement-disorders	-	NEUROLOGIC	#11118249;#11843825;#4045952	+
ABCB7	ENSG00000131269	301310	Muscle-spasticity	mild-spasticity	NEUROLOGIC	11118249	-
ABCB7	ENSG00000131269	301310	Musculoskeletal-diseases	-	MUSCULOSKELETAL	#11118249	+
ABCB7	ENSG00000131269	301310	Nervous-system-diseases	-	NEUROLOGIC	#4045952;#10196363;#11050011;#11118249;#11843825	+
ABCB7	ENSG00000131269	301310	Neurobehavioral-manifestations	-	NEUROLOGIC	#11050011;#11118249;#11843825;#4045952	+
ABCB7	ENSG00000131269	301310	Neurologic-manifestations	-	NEUROLOGIC	#4045952;#10196363;#11050011;#11118249;#11843825	+
ABCB7	ENSG00000131269	301310	Neuromuscular-manifestations	-	NEUROLOGIC	#11118249	+
ABCB7	ENSG00000131269	301310	Ocular-motility-disorders	abducens-palsy;broken-pursuit-eye-movements	OPHTHALMOLOGIC	11118249;#11050011;#11843825	-
ABCB7	ENSG00000131269	301310	Osteoarthritis	-	MUSCULOSKELETAL	11118249	-
ABCB7	ENSG00000131269	301310	Paleness	pallor	DERMATOLOGIC	11050011	-
ABCB7	ENSG00000131269	301310	Pathologic-nystagmus	hypometric-saccades-and-nystagmus	OPHTHALMOLOGIC	11050011;11118249;11843825	-
ABCB7	ENSG00000131269	301310	Porphyrins-abnormal	elevated-free-erythrocyte-protoporphyrin	METABOLIC	11050011;4045952	-
ABCB7	ENSG00000131269	301310	Psychiatric-disorders	-	PSYCHIATRIC	#11118249	+
ABCB7	ENSG00000131269	301310	Reflexes-abnormal	-	NEUROLOGIC	#11118249;#11843825;#4045952;#11050011	+
ABCB7	ENSG00000131269	301310	Schizophrenia	-	PSYCHIATRIC	11118249	-
ABCB7	ENSG00000131269	301310	Schizophrenia-and-psychotic-disorders	-	PSYCHIATRIC	#11118249	+
ABCB7	ENSG00000131269	301310	Skin-diseases	-	DERMATOLOGIC	#11050011	+
ABCB7	ENSG00000131269	301310	Speech-disorders	-	NEUROLOGIC	#11050011;#11118249;#11843825;#4045952	+
ABCB7	ENSG00000131269	301310	Strabismus	squint;concomitant-divergent-squint	OPHTHALMOLOGIC	11118249;11843825	-
ABCB7	ENSG00000131269	301310	Tremor	intention-tremor	NEUROLOGIC	11118249;11843825;4045952	-
ABCB7	ENSG00000131269	301310	Vision-disorders	binocular-vision-abnormal	OPHTHALMOLOGIC	11118249	-
ABCD1	ENSG00000101986	300100	Abdominal-pain	episodes	GASTROINTESTINAL	16672758	-
ABCD1	ENSG00000101986	300100	Adrenal-gland-diseases	-	ENDOCRINOLOGIC	#7849723;#16130276;#10369742;#14586615;#15564782;#11438993;#11810273;#961799;#3561956;#16672758;#10426149;#11204280	+
ABCD1	ENSG00000101986	300100	Adrenal-insufficiency	primary-adrenal-insufficiency;adrenal-atrophy;adrenocortical-insufficiency;Addisons-disease;adrenal-failure;atrophied-adrenal-glands	ENDOCRINOLOGIC	7849723;16130276;10369742;14586615;15564782;11438993;11810273;961799;3561956;16672758;10426149;#11204280	-
ABCD1	ENSG00000101986	300100	Aggression	verbal-aggression	PSYCHIATRIC	14586615	-
ABCD1	ENSG00000101986	300100	Anxiety-disorders	separation-anxiety;oversensitivity-to-noises;school-phobia	PSYCHIATRIC	12210797	-
ABCD1	ENSG00000101986	300100	Aphasia	-	NEUROLOGIC	11204280	-
ABCD1	ENSG00000101986	300100	Apraxias	increasing-dyspraxia;dyspraxia	NEUROLOGIC	16672758	-
ABCD1	ENSG00000101986	300100	Ataxia	limb;truncal;spastic-ataxic-gait	NEUROLOGIC	11204280;10980309	-
ABCD1	ENSG00000101986	300100	Axonal-degeneration	axonopathy;distal-axonopathy	NEUROLOGIC	11739809;16672758	-
ABCD1	ENSG00000101986	300100	Behavioral-symptoms	mnesic-and-behavioural-symptoms;behavioural-disturbances;behavioral-problems;behavioral-changes;clockwatching;apathy;abnormal-behavior	PSYCHIATRIC	10369742;12210797;14586615;10980309;16672758	-
ABCD1	ENSG00000101986	300100	Body-temperature-changes	-	MISCELLANEOUS	#15564782;#10426149	+
ABCD1	ENSG00000101986	300100	Brain-diseases	-	NEUROLOGIC	#9702690;#10980309;#16130276;#11204280;#10369742;#12210797;#14586615;#15564782;#11438993;#11810273;#961799;#16672758;#10426149;#16380594	+
ABCD1	ENSG00000101986	300100	Cardiorespiratory-arrest	respiratory-failure	CARDIOVASCULAR	9702690	-
ABCD1	ENSG00000101986	300100	Cardiovascular-diseases	-	CARDIOVASCULAR	#9702690;#16672758	+
ABCD1	ENSG00000101986	300100	Central-nervous-system-diseases	-	NEUROLOGIC	#9702690;#10426149;#10980309;#16130276;#11204280;#10369742;#12210797;#14586615;#15564782;#11438993;#11810273;#961799;#16672758;#16380594;#11739809	+
ABCD1	ENSG00000101986	300100	Cerebellar-atrophy	pons-atrophy;cerebellum-atrophy;cerebellar-atrophy;cerebellar-hemispheres-abnormal	NEUROLOGIC	9702690	-
ABCD1	ENSG00000101986	300100	Cerebral-atrophy	brain-stem-abnormal;parietooccipital-atrophy	NEUROLOGIC	9702690	-
ABCD1	ENSG00000101986	300100	Cerebral-necrosis	-	NEUROLOGIC	9702690	-
ABCD1	ENSG00000101986	300100	Cerebrovascular-disorders	PET-findings;positron-emission-tomography;reductions-of-regional-cerebral-blood-flow;cerebral-blood-flow-abnormal	NEUROLOGIC	9702690	-
ABCD1	ENSG00000101986	300100	Consciousness-disorders	somnolence;vegetative-state	NEUROLOGIC	9702690;16672758	-
ABCD1	ENSG00000101986	300100	Creatinine-levels-abnormal	elevated	GENITOURINARY	16672758	-
ABCD1	ENSG00000101986	300100	Deglutition-disorders	dysphagia	GASTROINTESTINAL	11204280	-
ABCD1	ENSG00000101986	300100	Dementia	short-time;memory-loss;cognitive-decline;frontotemporal-lobar-dementia;mental-impairment;mental-deterioration	PSYCHIATRIC	9702690;10369742;14586615;10980309;16672758	-
ABCD1	ENSG00000101986	300100	Depressive-disorder	depression	PSYCHIATRIC	9702690	-
ABCD1	ENSG00000101986	300100	Developmental-delay	speech-delay;language-delay;neuropsychological-delay	NEUROLOGIC	16672758;10426149	-
ABCD1	ENSG00000101986	300100	Digestive-system-diseases	-	GASTROINTESTINAL	#16672758;#11204280;#10426149	+
ABCD1	ENSG00000101986	300100	Diplopia	double-vision	OPHTHALMOLOGIC	10980309	-
ABCD1	ENSG00000101986	300100	Dysarthria	slurred-speech;dysarthria;anarthria	NEUROLOGIC	9702690;10426149	-
ABCD1	ENSG00000101986	300100	Dyskinesias	hypokinesia	NEUROLOGIC	9702690	-
ABCD1	ENSG00000101986	300100	Dystonic-disorders	dystonic-posturing	NEUROLOGIC	10426149	-
ABCD1	ENSG00000101986	300100	Electroencephalogram-abnormal	irregular-slow-waves;predominant-in-bilateral-temporal-areas;polyspikes;slow-wave-complexes	NEUROLOGIC	9702690;10980309	-
ABCD1	ENSG00000101986	300100	Endocrine-system-diseases	-	ENDOCRINOLOGIC	#7849723;#16130276;#10369742;#14586615;#15564782;#11438993;#11810273;#961799;#3561956;#16672758;#10426149;#10980309;#11204280	+
ABCD1	ENSG00000101986	300100	Eye-diseases	-	OPHTHALMOLOGIC	#11204280;#9702690;#16380594;#10369742;#10980309;#961799;#3561956;#10426149;#16672758	+
ABCD1	ENSG00000101986	300100	Fatty-acids-abnormal	very-long-chain-fatty-acids-elevated	METABOLIC	7849723;9702690;11739809;10369742;12210797;14586615;15564782;11438993;11810273;10980309;16672758;10426149	-
ABCD1	ENSG00000101986	300100	Feeding-behavior	predilection-for-sweet-foods	PSYCHIATRIC	14586615	-
ABCD1	ENSG00000101986	300100	Fever	episodes;febrile-illness	MISCELLANEOUS	15564782;10426149	-
ABCD1	ENSG00000101986	300100	Gait-disorders	gait-abnormalities;frequent-falls;unsteady-gait;walking-difficulties;gait-disturbance;stumbling;tripping	NEUROLOGIC	9702690;15564782;11810273;10980309;16672758;11739809	-
ABCD1	ENSG00000101986	300100	Gastrointestinal-diseases	-	GASTROINTESTINAL	#11204280	+
ABCD1	ENSG00000101986	300100	Genitourinary-diseases	-	GENITOURINARY	#16672758;#9702690;#10980309;#11204280;#14586615;#10426149;#11739809	+
ABCD1	ENSG00000101986	300100	Gonadal-disorders	-	ENDOCRINOLOGIC	#16130276;#10426149	+
ABCD1	ENSG00000101986	300100	Gynecomastia	-	DERMATOLOGIC	16130276	-
ABCD1	ENSG00000101986	300100	Hair-diseases	-	DERMATOLOGIC	#16130276	+
ABCD1	ENSG00000101986	300100	Hearing-disorders	hearing-loss;cognitive;auditory-disturbance;hearing-impairment	NEUROLOGIC	11204280;9702690;10369742;10980309	-
ABCD1	ENSG00000101986	300100	Hematologic-diseases	-	HEMATOLOGIC	#16672758	+
ABCD1	ENSG00000101986	300100	Hyperpigmentation	progressive-pigmentation;lips;buccal-mucosa;palmar-creases;nipples	DERMATOLOGIC	9702690;10369742;15564782;10426149	-
ABCD1	ENSG00000101986	300100	Hyperpituitarism	corticotropin-levels-abnormal;ACTH-elevated	ENDOCRINOLOGIC	15564782;10980309;10426149	-
ABCD1	ENSG00000101986	300100	Hyperreflexia	increased-deep-tendon-reflexes;female-carriers;jaw-hyperreflexia;arm-hyperreflexia	NEUROLOGIC	11204280;9702690;15564782;10980309;16672758;10426149;11739809	-
ABCD1	ENSG00000101986	300100	Hypoandrogenism	plasma-testosterone-levels-decreased;low-normal	ENDOCRINOLOGIC	16130276	-
ABCD1	ENSG00000101986	300100	Hypocortisolism	low-serum-cortisol	ENDOCRINOLOGIC	11204280;15564782;961799;16672758;10426149	-
ABCD1	ENSG00000101986	300100	Hypogonadism	hypogonadism;genital-defects	ENDOCRINOLOGIC	16130276	-
ABCD1	ENSG00000101986	300100	Hyponatremia	sodium-levels-decreased	METABOLIC	16672758	-
ABCD1	ENSG00000101986	300100	Hypotension	unrecordable-blood-pressure	CARDIOVASCULAR	16672758	-
ABCD1	ENSG00000101986	300100	Hypotrichosis	hair-abnormalities	DERMATOLOGIC	16130276	-
ABCD1	ENSG00000101986	300100	Infertility-male	male-infertility;impotence	GENITOURINARY	9702690;10980309	-
ABCD1	ENSG00000101986	300100	Irritability	irritable	NEUROLOGIC	9702690	-
ABCD1	ENSG00000101986	300100	Kidney-diseases	-	GENITOURINARY	#16672758	+
ABCD1	ENSG00000101986	300100	Leukocyte-disorders	-	HEMATOLOGIC	#16672758	+
ABCD1	ENSG00000101986	300100	Leukocytosis	-	HEMATOLOGIC	16672758	-
ABCD1	ENSG00000101986	300100	Leukoencephalopathy	adrenoleukodystrophy;leukodystrophy;white-matter-demyelination;white-matter-degeneration;inflammatory-myelinopathy;myelinopathy	NEUROLOGIC	16130276;9702690;11204280;10369742;12210797;14586615;15564782;11438993;11810273;10980309;961799;16672758;10426149	-
ABCD1	ENSG00000101986	300100	Lung-diseases	-	RESPIRATORY	#9702690	+
ABCD1	ENSG00000101986	300100	Male-genital-diseases	-	GENITOURINARY	#9702690;#10980309	+
ABCD1	ENSG00000101986	300100	Memory-disorders	forgetfulness;carelessness;memory-abnormal;personality-change	NEUROLOGIC	9702690;14586615	-
ABCD1	ENSG00000101986	300100	Mental-disorders	-	PSYCHIATRIC	#12210797;#9702690;#10369742;#14586615;#10980309;#16672758;#16380594	+
ABCD1	ENSG00000101986	300100	Metabolic-diseases	-	METABOLIC	#7849723;#9702690;#11739809;#10369742;#12210797;#14586615;#15564782;#11438993;#11810273;#10980309;#16672758;#10426149	+
ABCD1	ENSG00000101986	300100	Mood-disorders	-	PSYCHIATRIC	#9702690	+
ABCD1	ENSG00000101986	300100	Movement-disorders	-	NEUROLOGIC	#9702690;#10426149	+
ABCD1	ENSG00000101986	300100	Muscle-aching-and-stiffness	muscle-pain;exercise-triggered;stiffness;felt-stiff	NEUROLOGIC	16672758	-
ABCD1	ENSG00000101986	300100	Muscle-spasticity	spastic-paraplegia;spastic-paraparesis;leg-spasticity	NEUROLOGIC	7849723;15564782;11810273;10980309;16672758;10426149;11739809	-
ABCD1	ENSG00000101986	300100	Muscle-weakness	leg-weakness	NEUROLOGIC	11810273;10980309;16672758;10426149;11739809	-
ABCD1	ENSG00000101986	300100	Myoclonus	ankle-clonus;progressive	NEUROLOGIC	16672758;11739809	-
ABCD1	ENSG00000101986	300100	Nervous-system-diseases	-	NEUROLOGIC	#11204280;#16672758;#10980309;#11739809;#9702690;#10426149;#15564782;#11810273;#10369742;#16130276;#12210797;#14586615;#11438993;#961799;#7849723;#16380594	+
ABCD1	ENSG00000101986	300100	Neurobehavioral-manifestations	-	NEUROLOGIC	#11204280;#16672758;#9702690;#10426149;#14586615;#16380594;#10369742	+
ABCD1	ENSG00000101986	300100	Neurodegenerative-diseases	olivopontocerebellar-degenerations;neurodegeneration	NEUROLOGIC	9702690;15564782;11438993;11810273	-
ABCD1	ENSG00000101986	300100	Neurogenic-bladder	bladder-sphincter-disturbance	NEUROLOGIC	9702690;10980309	-
ABCD1	ENSG00000101986	300100	Neurologic-manifestations	-	NEUROLOGIC	#11204280;#16672758;#10980309;#9702690;#10426149;#15564782;#11810273;#11739809;#10369742;#14586615;#7849723;#16380594	+
ABCD1	ENSG00000101986	300100	Neuromuscular-manifestations	-	NEUROLOGIC	#16672758;#7849723;#15564782;#11810273;#10980309;#10426149;#11739809	+
ABCD1	ENSG00000101986	300100	Neuronal-loss-and-lesions	MRI-findings;signal-intensity-abnormalities;white-matter-abnormal;cerebral-peduncles-abnormal;cerebellar-hemispheres-abnormal;internal-capsule-abnormal;demyelination;periventricular-white-matter-abnormal	NEUROLOGIC	9702690;10369742;12210797;14586615;10980309;16672758;10426149	-
ABCD1	ENSG00000101986	300100	Ocular-motility-disorders	-	OPHTHALMOLOGIC	#9702690;#10980309;#3561956;#16672758	+
ABCD1	ENSG00000101986	300100	Optic-nerve-diseases	optic-nerve-hypoplasia;optic-pallor	OPHTHALMOLOGIC	961799;3561956	-
ABCD1	ENSG00000101986	300100	Paralysis-Paresis	spastic-paraplegia;spastic-paraparesis;progressive-paraparesis;spastic-diplegia;tetraparesis;tetraplegic	NEUROLOGIC	7849723;10369742;15564782;11810273;16672758;10426149;11739809	-
ABCD1	ENSG00000101986	300100	Pathologic-nystagmus	vertical-nystagmus;nystagmoid-movement	OPHTHALMOLOGIC	9702690;10980309	-
ABCD1	ENSG00000101986	300100	Peripheral-nervous-system-diseases	-	NEUROLOGIC	#7849723;#11739809;#16672758;#10980309	+
ABCD1	ENSG00000101986	300100	Pigmentation-disorders	-	DERMATOLOGIC	#9702690;#10369742;#15564782;#10426149	+
ABCD1	ENSG00000101986	300100	Pituitary-diseases	-	ENDOCRINOLOGIC	#15564782;#10980309;#10426149	+
ABCD1	ENSG00000101986	300100	Pneumonia	recurrent	RESPIRATORY	9702690	-
ABCD1	ENSG00000101986	300100	Polyneuropathies	peripheral-neuropathy;touch-sensation-reduced;pinprick-sensation-reduced;demyelinating-motor-neuropathy;paraesthesiae	NEUROLOGIC	7849723;11739809;16672758	-
ABCD1	ENSG00000101986	300100	Proprioception-impaired	reduced-sensation-to-vibration	NEUROLOGIC	7849723;10980309;16672758;11739809	-
ABCD1	ENSG00000101986	300100	Psychiatric-disorders	-	PSYCHIATRIC	#10369742;#12210797;#14586615;#10980309;#16672758;#9702690;#16380594	+
ABCD1	ENSG00000101986	300100	Psychomotor-agitation	ADHD;attention-deficit;inattention;emotional-liability;hyperactivity;misdiagnosed-as-ADHD	NEUROLOGIC	16380594;10369742	-
ABCD1	ENSG00000101986	300100	Psychotic-disorders	psychosis;psychoses;psychological-disorder;misdiagnosed-as-psychosis	PSYCHIATRIC	16380594	-
ABCD1	ENSG00000101986	300100	Puberty-delayed	delayed-puberty	ENDOCRINOLOGIC	10426149	-
ABCD1	ENSG00000101986	300100	Pyramidal-tract-signs	extensor-plantar-response;babinski-sign	NEUROLOGIC	9702690;11739809;10369742;15564782;10980309;10426149	-
ABCD1	ENSG00000101986	300100	Reflexes-abnormal	-	NEUROLOGIC	#11204280;#9702690;#15564782;#10980309;#16672758;#10426149;#11739809;#10369742	+
ABCD1	ENSG00000101986	300100	Respiratory-tract-diseases	-	RESPIRATORY	#9702690	+
ABCD1	ENSG00000101986	300100	Retinal-diseases	pigmentary-changes;retinal-ganglion-cell-degeneration	OPHTHALMOLOGIC	3561956	-
ABCD1	ENSG00000101986	300100	Schizophrenia	misdiagnosed-as-schizophrenia	PSYCHIATRIC	16380594	-
ABCD1	ENSG00000101986	300100	Schizophrenia-and-psychotic-disorders	-	PSYCHIATRIC	#16380594	+
ABCD1	ENSG00000101986	300100	Seizures	nonfebrile-seizures;convulsions;epilepsy;generalized-epileptic-seizures	NEUROLOGIC	11204280;9702690;16380594;10980309	-
ABCD1	ENSG00000101986	300100	Skin-diseases	-	DERMATOLOGIC	#16130276;#9702690;#10369742;#15564782;#10426149	+
ABCD1	ENSG00000101986	300100	Speech-disorders	-	NEUROLOGIC	#11204280;#9702690;#10426149	+
ABCD1	ENSG00000101986	300100	Spinal-cord-diseases	adrenomyeloneuropathy;myelopathy;altered-spinal-cord;distal-axonopathy;thoracic-cord-atrophy;cervical-cord-atrophy	NEUROLOGIC	9702690;15564782;11438993;11810273;16672758;10426149;11739809	-
ABCD1	ENSG00000101986	300100	Strabismus	exotropia;esotropia;squint;convergent-squint	OPHTHALMOLOGIC	10980309;3561956;16672758	-
ABCD1	ENSG00000101986	300100	Tinnitus	-	NEUROLOGIC	9702690	-
ABCD1	ENSG00000101986	300100	Urination-disorders	episodic-incontinence;urinary-incontinence;urinary-urgency;urinary-retention;sphincter-incontinence;urinary-hesitancy	GENITOURINARY	11204280;14586615;10980309;16672758;10426149;11739809	-
ABCD1	ENSG00000101986	300100	Urologic-diseases	-	GENITOURINARY	#16672758;#11204280;#14586615;#10980309;#10426149;#11739809	+
ABCD1	ENSG00000101986	300100	Vascular-diseases	-	CARDIOVASCULAR	#16672758	+
ABCD1	ENSG00000101986	300100	Vision-disorders	blindness;cortical-blindness;loss-of-vision;hemianopsia;visual-disturbances;visual-loss;blind	OPHTHALMOLOGIC	11204280;9702690;16380594;10369742;10980309;961799;3561956;10426149	-
ABCD1	ENSG00000101986	300100	Vomiting	frequent-vomiting	GASTROINTESTINAL	10426149	-
ABCD1	ENSG00000101986	300100	Water-electrolyte-imbalance	-	METABOLIC	#16672758	+
ACADL	ENSG00000115361	201460	Acid-base-imbalance	-	METABOLIC	#2000272	+
ACADL	ENSG00000115361	201460	Acidosis	lactic-acidosis	METABOLIC	2000272	-
ACADL	ENSG00000115361	201460	Acylcarnitine-profile-abnormal	elevated-long-chain-acylcarnitines;elevated-C12:0-C14:0-C14:1-C16:0-acylcarnitines	METABOLIC	2000272	-
ACADL	ENSG00000115361	201460	Adrenal-gland-diseases	-	ENDOCRINOLOGIC	#2000272	+
ACADL	ENSG00000115361	201460	Adrenocortical-hyperfunction	-	ENDOCRINOLOGIC	#2000272	+
ACADL	ENSG00000115361	201460	Blood-coagulation-disorders	prothrombin-time-prolonged	HEMATOLOGIC	2000272	-
ACADL	ENSG00000115361	201460	Body-temperature-changes	-	MISCELLANEOUS	#2000272	+
ACADL	ENSG00000115361	201460	Cardiomyopathy	cardiomegaly;myocardium-thickened	CARDIOVASCULAR	4022672;2000272;1945557	-
ACADL	ENSG00000115361	201460	Cardiorespiratory-arrest	episodes;respiratory-arrest	CARDIOVASCULAR	4022672;2000272	-
ACADL	ENSG00000115361	201460	Cardiovascular-diseases	-	CARDIOVASCULAR	#4022672;#2000272;#1945557	+
ACADL	ENSG00000115361	201460	Carnitine-levels-abnormal	decreased-total-carnitine;decreased-free-carnitine;elevated-esterified-carnitine	METABOLIC	4022672	-
ACADL	ENSG00000115361	201460	Consciousness-disorders	coma	NEUROLOGIC	2000272	-
ACADL	ENSG00000115361	201460	Craniofacial-abnormalities	-	MUSCULOSKELETAL	#2000272	+
ACADL	ENSG00000115361	201460	Creatine-kinase-abnormal	-	MISCELLANEOUS	2000272	-
ACADL	ENSG00000115361	201460	Creatinine-levels-abnormal	creatinine-elevated	GENITOURINARY	2000272	-
ACADL	ENSG00000115361	201460	Developmental-delay	motor-retardation	NEUROLOGIC	8739959	-
ACADL	ENSG00000115361	201460	Diarrhea	-	GASTROINTESTINAL	2000272	-
ACADL	ENSG00000115361	201460	Dicarboxylic-aciduria	dicarboxylic-acids-elevated	METABOLIC	2000272;8739959	-
ACADL	ENSG00000115361	201460	Digestive-system-diseases	-	GASTROINTESTINAL	#2000272;#8739959;#4022672;#1945557	+
ACADL	ENSG00000115361	201460	Endocrine-system-diseases	-	ENDOCRINOLOGIC	#2000272	+
ACADL	ENSG00000115361	201460	Failure-to-thrive	-	MISCELLANEOUS	2000272;8739959	-
ACADL	ENSG00000115361	201460	Fatty-acids-abnormal	-	METABOLIC	4022672	-
ACADL	ENSG00000115361	201460	Fatty-liver	liver-fatty-change;steatosis	GASTROINTESTINAL	2000272	-
ACADL	ENSG00000115361	201460	Feeding-difficulties	coeliac-disease-like	GASTROINTESTINAL	2000272;8739959	-
ACADL	ENSG00000115361	201460	Fever	-	MISCELLANEOUS	2000272	-
ACADL	ENSG00000115361	201460	Genitourinary-diseases	-	GENITOURINARY	#2000272	+
ACADL	ENSG00000115361	201460	Glucose-metabolism-disorders	-	METABOLIC	#4022672;#2000272;#1945557	+
ACADL	ENSG00000115361	201460	Growth-disorders	-	MISCELLANEOUS	#2000272;#8739959	+
ACADL	ENSG00000115361	201460	Heart-diseases	-	CARDIOVASCULAR	#4022672;#2000272;#1945557	+
ACADL	ENSG00000115361	201460	Hematologic-diseases	-	HEMATOLOGIC	#2000272	+
ACADL	ENSG00000115361	201460	Hepatomegaly	-	GASTROINTESTINAL	4022672;2000272;1945557	-
ACADL	ENSG00000115361	201460	Hypercortisolism	cortisol-levels-elevated	ENDOCRINOLOGIC	2000272	-
ACADL	ENSG00000115361	201460	Hypoglycemia	severe-hypoglycemia	METABOLIC	4022672;2000272;1945557	-
ACADL	ENSG00000115361	201460	Kidney-diseases	-	GENITOURINARY	#2000272	+
ACADL	ENSG00000115361	201460	Lethargy	-	NEUROLOGIC	2000272	-
ACADL	ENSG00000115361	201460	Liver-diseases	-	GASTROINTESTINAL	#2000272;#4022672;#1945557	+
ACADL	ENSG00000115361	201460	Liver-enzymes-abnormal	ALT-elevated;AST-elevated;GGT-elevated	GASTROINTESTINAL	2000272	-
ACADL	ENSG00000115361	201460	Metabolic-diseases	-	METABOLIC	#2000272;#4022672;#8739959;#1945557	+
ACADL	ENSG00000115361	201460	Microcephaly	-	MUSCULOSKELETAL	2000272	-
ACADL	ENSG00000115361	201460	Muscle-aching-and-stiffness	myalgia	NEUROLOGIC	2000272	-
ACADL	ENSG00000115361	201460	Muscle-hypotonia	-	NEUROLOGIC	4022672;8739959	-
ACADL	ENSG00000115361	201460	Muscle-weakness	persistent	NEUROLOGIC	2000272;1945557	-
ACADL	ENSG00000115361	201460	Muscular-diseases	-	MUSCULOSKELETAL	#2000272	+
ACADL	ENSG00000115361	201460	Musculoskeletal-diseases	-	MUSCULOSKELETAL	#2000272	+
ACADL	ENSG00000115361	201460	Myoglobinuria	-	MUSCULOSKELETAL	2000272	-
ACADL	ENSG00000115361	201460	Nervous-system-diseases	-	NEUROLOGIC	#2000272;#8739959;#4022672;#1945557	+
ACADL	ENSG00000115361	201460	Neurobehavioral-manifestations	-	NEUROLOGIC	#2000272	+
ACADL	ENSG00000115361	201460	Neurologic-manifestations	-	NEUROLOGIC	#2000272;#4022672;#8739959;#1945557	+
ACADL	ENSG00000115361	201460	Neuromuscular-manifestations	-	NEUROLOGIC	#2000272;#4022672;#8739959;#1945557	+
ACADL	ENSG00000115361	201460	Organic-acids-abnormal	lactic-aciduria;dicarboxylic-aciduria;adipic-aciduria;suberic-aciduria;sebacic-aciduria;3-hydroxydicarboxylic-aciduria;3-hydroxyadipic-aciduria;3-hydroxysuberic-aciduria;3-hydroxysebacic-aciduria	METABOLIC	2000272;8739959	-
ACADL	ENSG00000115361	201460	Respiration-disorders	apneic	RESPIRATORY	2000272	-
ACADL	ENSG00000115361	201460	Respiratory-tract-diseases	-	RESPIRATORY	#2000272	+
ACADL	ENSG00000115361	201460	Urologic-diseases	-	GENITOURINARY	#2000272	+
ACADL	ENSG00000115361	201460	Vomiting	-	GASTROINTESTINAL	2000272;8739959	-
ACADM	ENSG00000117054	201450	Acid-base-imbalance	-	METABOLIC	#7876853;#12897989;#15858970;#2279505;#11486912;#11349232	+
ACADM	ENSG00000117054	201450	Acidosis	mild;lactate-acidosis;metabolic-acidosis	METABOLIC	7876853;12897989;15858970;2279505	-
ACADM	ENSG00000117054	201450	Acylcarnitine-profile-abnormal	elevated-medium-chain-acylcarnitines;elevated-C6:0-C8:0-C8:1-C10:1-acylcarnitines;octanoylcarnitine-elevated	METABOLIC	11486912;7876853;2246856;11409868;12897989;15858970;2279505;11349232	-
ACADM	ENSG00000117054	201450	Acylglycine-profile-abnormal	superylglycinuria;hexanoylglycinuria;phenylpropionylglycinuria;urinary-excretion-of-glycine-esters	METABOLIC	11486912;7876853;2380628;2246856;11409868;12897989;15858970;11349232	-
ACADM	ENSG00000117054	201450	Aminoacid-levels-abnormal	elevated-alanine	METABOLIC	11346377	-
ACADM	ENSG00000117054	201450	Arrhythmia	atrial-bigeminy;heart-block;arrhythmic;ventricular-tachycardia;atrial-fibrillations;bradycardia;ventricular-fibrillation	CARDIOVASCULAR	11346377;12897989;15858970	-
ACADM	ENSG00000117054	201450	Blood-circulation-disorder	cool-extremities;blue-extremities;perfusion-abnormal;poor-perfusion;slow-capillary-refill;probably-dehydration-related	CARDIOVASCULAR	11346377	-
ACADM	ENSG00000117054	201450	Blood-coagulation-disorders	prothrombin-time-prolonged;intravascular-coagulation	HEMATOLOGIC	7929823;15858970	-
ACADM	ENSG00000117054	201450	Blood-protein-disorders	-	HEMATOLOGIC	#11346377	+
ACADM	ENSG00000117054	201450	Body-temperature-changes	-	MISCELLANEOUS	#9158144;#11524729;#2279505;#9350306;#15858970	+
ACADM	ENSG00000117054	201450	Brain-diseases	-	NEUROLOGIC	#7876853;#12897989;#9350306;#11263545;#11524729;#11349232;#9158144	+
ACADM	ENSG00000117054	201450	Brain-edema	cerebral-edema;CT-findings;thin-lateral-ventricles-indicative-of-cerebral-oedema;diffuse-cerebral-oedema	NEUROLOGIC	7876853;12897989;9350306	-
ACADM	ENSG00000117054	201450	Cardiomyopathy	left-ventricle-hypertrophy;repolarisation-disturbances;cardiomegaly;biventricular-dilatation	CARDIOVASCULAR	7929823;7876853;2380628;15858970	-
ACADM	ENSG00000117054	201450	Cardiorespiratory-arrest	sudden-infant-death;SIDS;cardiac-dysfunction;respiratory-arrest;cardiac-arrest;asystolic-cardiac-arrest	CARDIOVASCULAR	11486912;9158144;7929823;11263545;11524729;2380628;2246856;12897989;15858970;9350306;11349232	-
ACADM	ENSG00000117054	201450	Cardiovascular-diseases	-	CARDIOVASCULAR	#11346377;#12897989;#15858970;#7929823;#7876853;#2380628;#11486912;#9158144;#11263545;#11524729;#2246856;#9350306;#11349232	+
ACADM	ENSG00000117054	201450	Carnitine-levels-abnormal	decreased-total-carnitine;decreased-free-carnitine;elevated-esterified-carnitine;urinary-excretion-of-carnitine	METABOLIC	11486912;7876853;2380628;15858970;2279505	-
ACADM	ENSG00000117054	201450	Central-nervous-system-diseases	-	NEUROLOGIC	#7876853;#12897989;#9350306;#11263545;#11524729;#11349232;#9158144	+
ACADM	ENSG00000117054	201450	Consciousness-disorders	coma;delirious;consciousness-altered;comatose	NEUROLOGIC	11349232;7929823;11524729;7876853;12897989;2279505	-
ACADM	ENSG00000117054	201450	Creatine-kinase-abnormal	elevated	MISCELLANEOUS	11346377;7876853;12897989	-
ACADM	ENSG00000117054	201450	Creatinine-levels-abnormal	plasma-creatinine-elevated	GENITOURINARY	7876853	-
ACADM	ENSG00000117054	201450	Dehydration	-	METABOLIC	11346377;11524729	-
ACADM	ENSG00000117054	201450	Developmental-delay	cerebral-palsy	NEUROLOGIC	7929823;11263545	-
ACADM	ENSG00000117054	201450	Diarrhea	watery-diarrhea;diarrhoea	GASTROINTESTINAL	9158144;11346377;2279505;9350306	-
ACADM	ENSG00000117054	201450	Dicarboxylic-aciduria	dicarboxylic-acids-elevated;medium-chain-dicarboxylic-aciduria	METABOLIC	7929823;2380628;11409868;12897989;2246856;15858970;2279505;11349232	-
ACADM	ENSG00000117054	201450	Digestive-system-diseases	-	GASTROINTESTINAL	#9158144;#11346377;#2279505;#9350306;#7929823;#11524729;#2246856;#11486912;#15858970;#2380628;#7876853;#12897989	+
ACADM	ENSG00000117054	201450	Electroencephalogram-abnormal	generalised-slowing-background-pattern	NEUROLOGIC	7876853	-
ACADM	ENSG00000117054	201450	Encephalopathy	acute-encephalopathy	NEUROLOGIC	11263545;11524729;7876853	-
ACADM	ENSG00000117054	201450	Failure-to-thrive	-	MISCELLANEOUS	11263545	-
ACADM	ENSG00000117054	201450	Fatty-acids-abnormal	octanoic-acid-elevated;plasma	METABOLIC	11486912	-
ACADM	ENSG00000117054	201450	Fatty-liver	hepatic-fatty-infiltration;large-droplet-steatosis	GASTROINTESTINAL	7929823;2246856;2279505;9350306	-
ACADM	ENSG00000117054	201450	Feeding-difficulties	feeding-rejection;fed-poorly	GASTROINTESTINAL	11486912;7929823;2246856;15858970;2279505	-
ACADM	ENSG00000117054	201450	Fever	-	MISCELLANEOUS	9158144;11524729;2279505;9350306	-
ACADM	ENSG00000117054	201450	Gastroenteritis	viral	GASTROINTESTINAL	9158144;7929823	-
ACADM	ENSG00000117054	201450	Gastrointestinal-diseases	-	GASTROINTESTINAL	#9158144;#7929823	+
ACADM	ENSG00000117054	201450	Genitourinary-diseases	-	GENITOURINARY	#7876853;#12897989;#11346377	+
ACADM	ENSG00000117054	201450	Glucose-metabolism-disorders	-	METABOLIC	#11486912;#7929823;#11346377;#2380628;#2246856;#12897989;#2279505;#11349232	+
ACADM	ENSG00000117054	201450	Growth-disorders	-	MISCELLANEOUS	#11263545	+
ACADM	ENSG00000117054	201450	Headache-disorders	headache	NEUROLOGIC	7876853;12897989	-
ACADM	ENSG00000117054	201450	Heart-diseases	-	CARDIOVASCULAR	#11346377;#12897989;#15858970;#7929823;#7876853;#2380628	+
ACADM	ENSG00000117054	201450	Hematologic-diseases	-	HEMATOLOGIC	#7929823;#15858970;#11346377	+
ACADM	ENSG00000117054	201450	Hemoglobin-levels-abnormal	hemoglobin-deficiency	HEMATOLOGIC	11346377;15858970	-
ACADM	ENSG00000117054	201450	Hepatomegaly	liver-enlargement	GASTROINTESTINAL	9158144;2380628;15858970	-
ACADM	ENSG00000117054	201450	Hyperalbuminemia	albumin-levels-increased	HEMATOLOGIC	11346377	-
ACADM	ENSG00000117054	201450	Hyperammonemia	ammonia-levels-elevated	METABOLIC	11346377;12897989	-
ACADM	ENSG00000117054	201450	Hyperkalemia	potassium-concentration-elevated	METABOLIC	7876853;12897989	-
ACADM	ENSG00000117054	201450	Hyperphosphatemia	phosphate-concentrations-increased	METABOLIC	7876853	-
ACADM	ENSG00000117054	201450	Hyperventilation	tachypnea;tachypnoeic	RESPIRATORY	7929823;15858970	-
ACADM	ENSG00000117054	201450	Hypocalcemia	calcium-levels-abnormal	METABOLIC	11346377	-
ACADM	ENSG00000117054	201450	Hypoglycemia	hypoglycemic-shock;hypoglycaemia	METABOLIC	11486912;7929823;11346377;2380628;2246856;12897989;2279505;11349232	-
ACADM	ENSG00000117054	201450	Hypoketosis	hypoketotic-hypoglycemia	METABOLIC	11486912;11349232	-
ACADM	ENSG00000117054	201450	Hypothermia	hypothermic	MISCELLANEOUS	15858970	-
ACADM	ENSG00000117054	201450	Immune-system-diseases	-	IMMUNOLOGIC	#11486912;#11346377;#11524729;#2380628;#2246856;#2279505	+
ACADM	ENSG00000117054	201450	Infections	intercurrent;viral-infections;respiratory-tract-infections;rotavirus;respiratory-syncytial-virus;recurrent-infections	IMMUNOLOGIC	11486912;11346377;11524729;2380628;2246856;2279505	-
ACADM	ENSG00000117054	201450	Irritability	irritable	NEUROLOGIC	7876853;2279505	-
ACADM	ENSG00000117054	201450	Kidney-diseases	-	GENITOURINARY	#7876853;#12897989;#11346377	+
ACADM	ENSG00000117054	201450	Lethargy	drowsiness;lethargic;sudden-onset-of-lethargy	NEUROLOGIC	11486912;11349232;11346377;7876853;12897989;15858970	-
ACADM	ENSG00000117054	201450	Liver-diseases	hepatic-failure;hepatic-coma;liver-function-abnormal	GASTROINTESTINAL	7929823;11524729;2279505;#2246856;#9350306;#9158144;#2380628;#15858970;#11346377;#7876853;#12897989	-
ACADM	ENSG00000117054	201450	Liver-enzymes-abnormal	transaminases-abnormal;ALT-elevated;AST-elevated;GGT-elevated	GASTROINTESTINAL	7929823;11346377;7876853;12897989;2279505	-
ACADM	ENSG00000117054	201450	Lung-diseases	-	RESPIRATORY	#15858970	+
ACADM	ENSG00000117054	201450	Metabolic-brain-diseases	CSF-protein-elevated	METABOLIC	7876853;#9158144;#7929823;#2246856;#2279505;#9350306	-
ACADM	ENSG00000117054	201450	Metabolic-diseases	-	METABOLIC	#7876853;#12897989;#15858970;#2279505;#11486912;#2246856;#11409868;#11349232;#2380628;#11346377;#11524729;#7929823;#9158144;#9350306	+
ACADM	ENSG00000117054	201450	Mitochondria-abnormal	elongated;abnormally-configurated;increased-numbers;matrix-density-increased;cristae-widening	MISCELLANEOUS	2279505	-
ACADM	ENSG00000117054	201450	Muscle-hypotonia	hypotonic;muscle-tone-decreased	NEUROLOGIC	9158144;15858970;2279505	-
ACADM	ENSG00000117054	201450	Muscle-weakness	progressive-weakness	NEUROLOGIC	11263545;11524729;7876853	-
ACADM	ENSG00000117054	201450	Muscular-diseases	type-2-fiber-predominance;lipid-droplets-between-myofibrils;glycogen-accumulation	MUSCULOSKELETAL	7876853;#11524729	-
ACADM	ENSG00000117054	201450	Musculoskeletal-diseases	-	MUSCULOSKELETAL	#7876853;#11524729	+
ACADM	ENSG00000117054	201450	Myoglobinuria	dark-brown-coloured-urine	MUSCULOSKELETAL	7876853	-
ACADM	ENSG00000117054	201450	Nervous-system-diseases	-	NEUROLOGIC	#7876853;#12897989;#9350306;#11349232;#7929823;#11524729;#2279505;#11263545;#11486912;#11346377;#15858970;#9158144	+
ACADM	ENSG00000117054	201450	Neurobehavioral-manifestations	-	NEUROLOGIC	#11349232;#7929823;#11524729;#7876853;#12897989;#2279505;#11486912;#11346377;#15858970;#11263545	+
ACADM	ENSG00000117054	201450	Neurologic-manifestations	-	NEUROLOGIC	#11349232;#7929823;#11524729;#7876853;#12897989;#2279505;#11486912;#11346377;#15858970;#9158144;#11263545	+
ACADM	ENSG00000117054	201450	Neuromuscular-manifestations	-	NEUROLOGIC	#9158144;#15858970;#2279505;#11263545;#11524729;#7876853	+
ACADM	ENSG00000117054	201450	Organic-acids-abnormal	dicarboxylic-aciduria;adipic-aciduria;suberic-aciduria;sebacic-aciduria;decanoic-aciduria;elevated-octanoylcarnitine;suberylglycinuria	METABOLIC	7929823;7876853;2380628;2246856;#11409868;#12897989;#15858970;#2279505;#11349232	-
ACADM	ENSG00000117054	201450	Paleness	dusky-pallor;pale	DERMATOLOGIC	7929823;15858970	-
ACADM	ENSG00000117054	201450	Phosphorus-metabolism-disorders	-	METABOLIC	#7876853	+
ACADM	ENSG00000117054	201450	Psychomotor-agitation	ADHD;attention-deficit;hyperactivity;agitated-patient;motor-restlessness	NEUROLOGIC	11263545;7876853	-
ACADM	ENSG00000117054	201450	Pulmonary-edema	pulmonary-oedema	RESPIRATORY	15858970	-
ACADM	ENSG00000117054	201450	Pulmonary-hemorrhage	-	RESPIRATORY	15858970	-
ACADM	ENSG00000117054	201450	Renal-insufficiency	moderate-renal-insufficiency;acute-renal-failure	GENITOURINARY	7876853;12897989	-
ACADM	ENSG00000117054	201450	Respiration-disorders	apnea;respiratory-status-impaired	RESPIRATORY	9158144;15858970;#7929823	-
ACADM	ENSG00000117054	201450	Respiratory-tract-diseases	-	RESPIRATORY	#9158144;#15858970;#7929823	+
ACADM	ENSG00000117054	201450	Reye-like-symptoms	reye-syndrome-like	METABOLIC	9158144;7929823;2246856;2279505;9350306	-
ACADM	ENSG00000117054	201450	Rhabdomyolysis	acute-muscle-necrosis	MUSCULOSKELETAL	11524729;7876853	-
ACADM	ENSG00000117054	201450	Seizures	seizures;convulsions	NEUROLOGIC	11349232;9158144	-
ACADM	ENSG00000117054	201450	Skin-diseases	-	DERMATOLOGIC	#7929823;#15858970	+
ACADM	ENSG00000117054	201450	Speech-disorders	incoherent-speech	NEUROLOGIC	12897989	-
ACADM	ENSG00000117054	201450	Uremia	increase-of-plasma-urea;elevated-urea-levels	GENITOURINARY	11346377;7876853	-
ACADM	ENSG00000117054	201450	Urologic-diseases	-	GENITOURINARY	#7876853;#12897989;#11346377	+
ACADM	ENSG00000117054	201450	Vomiting	vomiting-and-nausea	GASTROINTESTINAL	9158144;11346377;11524729;7876853;12897989	-
ACADM	ENSG00000117054	201450	Water-electrolyte-imbalance	-	METABOLIC	#11346377;#11524729;#7876853;#12897989	+
ACADS	ENSG00000122971	201470	Acid-base-imbalance	-	METABOLIC	#7776094;#2808706;#3571488;#12061367	+
ACADS	ENSG00000122971	201470	Acidosis	metabolic-acidosis;neonatal	METABOLIC	7776094;2808706;3571488;12061367	-
ACADS	ENSG00000122971	201470	Acylcarnitine-profile-abnormal	elevated-C4-acylcarnitine;elevated-butyrylcarnitine;C4-elevation-during-episodes	METABOLIC	7776094;15534767;14595061;12872838	-
ACADS	ENSG00000122971	201470	Acylglycine-profile-abnormal	butyrylglycinuria;isovalerylglycine	METABOLIC	7776094;9932958	-
ACADS	ENSG00000122971	201470	Alkaline-phosphatase-abnormal	elevated	MISCELLANEOUS	14595061	-
ACADS	ENSG00000122971	201470	Aminoaciduria	aspartate-elevated;threonine-elevated;glutamine-elevated;proline-elevated;glycine-elevated;alanine-elevated;histidine-elevated	METABOLIC	3571488;3335634	-
ACADS	ENSG00000122971	201470	Arrhythmia	tachycardia	CARDIOVASCULAR	3571488	-
ACADS	ENSG00000122971	201470	Biliary-tract-diseases	-	GASTROINTESTINAL	#3571488	+
ACADS	ENSG00000122971	201470	Blepharoptosis	ptosis	OPHTHALMOLOGIC	9932958;3571488;3335634	-
ACADS	ENSG00000122971	201470	Blood-circulation-disorder	pale-extremities;mottled-extremities	CARDIOVASCULAR	3571488	-
ACADS	ENSG00000122971	201470	Blood-platelet-disorders	-	HEMATOLOGIC	#3571488	+
ACADS	ENSG00000122971	201470	Body-temperature-changes	-	MISCELLANEOUS	#9578969;#14595061	+
ACADS	ENSG00000122971	201470	Bone-diseases	-	MUSCULOSKELETAL	#9932958;#11524729	+
ACADS	ENSG00000122971	201470	Brain-diseases	-	NEUROLOGIC	#3571488;#9578969;#15534767;#11134486;#7776094	+
ACADS	ENSG00000122971	201470	Brain-edema	cerebral-edema	NEUROLOGIC	3571488	-
ACADS	ENSG00000122971	201470	Cardiomyopathy	bilateral;hypertrophic;ventricular-dysfunction;left-ventricle	CARDIOVASCULAR	9932958	-
ACADS	ENSG00000122971	201470	Cardiovascular-diseases	-	CARDIOVASCULAR	#3571488;#9932958	+
ACADS	ENSG00000122971	201470	Carnitine-levels-abnormal	decreased-total-carnitine;decreased-free-carnitine;elevated-esterified-carnitine	METABOLIC	2808706;3335634;15534767;12061367	-
ACADS	ENSG00000122971	201470	Cataract	-	OPHTHALMOLOGIC	9932958	-
ACADS	ENSG00000122971	201470	Central-nervous-system-diseases	-	NEUROLOGIC	#3571488;#9578969;#15534767;#11134486;#7776094	+
ACADS	ENSG00000122971	201470	Cerebral-atrophy	CT-findings;atrophy;ventricular-dilatation;wide-extracerebral-space	NEUROLOGIC	9578969;15534767	-
ACADS	ENSG00000122971	201470	Cholestasis	intracanalicular-cholestasis	GASTROINTESTINAL	3571488	-
ACADS	ENSG00000122971	201470	Consciousness-disorders	low-level-of-consciousness;consciousness-decreased	NEUROLOGIC	9499414;9578969	-
ACADS	ENSG00000122971	201470	Craniofacial-abnormalities	-	MUSCULOSKELETAL	#3571488;#3335634	+
ACADS	ENSG00000122971	201470	Creatine-kinase-abnormal	elevated;raised	MISCELLANEOUS	15534767	-
ACADS	ENSG00000122971	201470	Developmental-delay	psychomotor-retardation;speech-development-delayed;failure-to-aquire-motor-skills	NEUROLOGIC	11134486;11524729;7776094;2808706;3335634;15534767;14595061	-
ACADS	ENSG00000122971	201470	Dicarboxylic-aciduria	mild;elevation-of-dicarboxylic-acids;urine-sample	METABOLIC	3571488;3335634;9578969	-
ACADS	ENSG00000122971	201470	Digestive-system-diseases	-	GASTROINTESTINAL	#3571488;#7776094;#9499414;#11524729;#3335634;#9578969;#12061367;#14595061;#12872838	+
ACADS	ENSG00000122971	201470	Dysmorphism-and-abnormalities	dysmorphic-features	MISCELLANEOUS	11134486	-
ACADS	ENSG00000122971	201470	Electroencephalogram-abnormal	multifocal-seizures;poor-background-activity	NEUROLOGIC	3571488	-
ACADS	ENSG00000122971	201470	Electromyography-abnormal	Electromyogram-abnormal;severe-loss-of-compound-motor-action-potential	NEUROLOGIC	15534767	-
ACADS	ENSG00000122971	201470	Ethylmalonic-aciduria	ethylmalonic-acids-elevated;ethylmalonate-elevated	METABOLIC	11134486;9932958;7776094;2808706;3571488;9578969;15534767;14595061;12872838;12061367;9499414	-
ACADS	ENSG00000122971	201470	Eye-diseases	-	OPHTHALMOLOGIC	#9932958;#3571488;#3335634;#15534767;#7776094	+
ACADS	ENSG00000122971	201470	Failure-to-thrive	-	MISCELLANEOUS	7776094;9499414;3335634	-
ACADS	ENSG00000122971	201470	Fatty-acids-abnormal	serum;free-fatty-acids-elevated	METABOLIC	12061367	-
ACADS	ENSG00000122971	201470	Fatty-liver	fatty-changes;microvesicular-fat;	GASTROINTESTINAL	3571488	-
ACADS	ENSG00000122971	201470	Feeding-difficulties	poor-feeding;fed-poorly	GASTROINTESTINAL	7776094;9499414;11524729;3571488;3335634;9578969	-
ACADS	ENSG00000122971	201470	Female-genital-diseases	-	GENITOURINARY	#14595061	+
ACADS	ENSG00000122971	201470	Fever	febrile-illness	MISCELLANEOUS	9578969;14595061	-
ACADS	ENSG00000122971	201470	Gastroenteritis	-	GASTROINTESTINAL	12061367	-
ACADS	ENSG00000122971	201470	Gastrointestinal-diseases	-	GASTROINTESTINAL	#12061367	+
ACADS	ENSG00000122971	201470	Genitourinary-diseases	-	GENITOURINARY	#14595061;#3571488	+
ACADS	ENSG00000122971	201470	Glucose-metabolism-disorders	-	METABOLIC	#11134486;#3571488;#12061367	+
ACADS	ENSG00000122971	201470	Growth-disorders	-	MISCELLANEOUS	#7776094;#9499414;#3335634	+
ACADS	ENSG00000122971	201470	Heart-diseases	-	CARDIOVASCULAR	#3571488;#9932958	+
ACADS	ENSG00000122971	201470	Hematologic-diseases	-	HEMATOLOGIC	#3571488	+
ACADS	ENSG00000122971	201470	Hemoglobin-levels-abnormal	hemoglobin-deficiency	HEMATOLOGIC	3571488	-
ACADS	ENSG00000122971	201470	Hepatomegaly	hepatosplenomegaly	GASTROINTESTINAL	3571488;14595061	-
ACADS	ENSG00000122971	201470	Hyperbilirubinemia	elevated-conjugated-serum-bilirubin;jaundice	METABOLIC	14595061	-
ACADS	ENSG00000122971	201470	Hyperkalemia	potassium-elevated	METABOLIC	3571488	-
ACADS	ENSG00000122971	201470	Hypernatremia	-	METABOLIC	3571488	-
ACADS	ENSG00000122971	201470	Hyperreflexia	-	NEUROLOGIC	7776094	-
ACADS	ENSG00000122971	201470	Hyperventilation	hyperpnea	RESPIRATORY	3571488	-
ACADS	ENSG00000122971	201470	Hypoglycemia	blood-sugar-decreased;plasma-glucagon-elevated;hypoglycaemia	METABOLIC	11134486;3571488;12061367	-
ACADS	ENSG00000122971	201470	Hyporeflexia	deep-tendon-reflexes-absent	NEUROLOGIC	9932958;15534767	-
ACADS	ENSG00000122971	201470	Immune-system-diseases	-	IMMUNOLOGIC	#9932958;#3571488;#9578969;#15534767;#12061367	+
ACADS	ENSG00000122971	201470	Infections	respiratory-tract-infections;viral-infections;bronchiolitis;urinary-tract-infections;tonsilitis	IMMUNOLOGIC	9932958;3571488;9578969;15534767;12061367	-
ACADS	ENSG00000122971	201470	Joint-diseases	-	MUSCULOSKELETAL	#9932958	+
ACADS	ENSG00000122971	201470	Joint-limitations	joint-limitations;joint-contractures;progressive	MUSCULOSKELETAL	9932958	-
ACADS	ENSG00000122971	201470	Kidney-diseases	-	GENITOURINARY	#3571488	+
ACADS	ENSG00000122971	201470	Lens-diseases	-	OPHTHALMOLOGIC	#9932958	+
ACADS	ENSG00000122971	201470	Lethargy	lethargic;listlessness;weak;tired	NEUROLOGIC	7776094;3571488;12061367	-
ACADS	ENSG00000122971	201470	Leukocyte-disorders	-	HEMATOLOGIC	#3571488	+
ACADS	ENSG00000122971	201470	Leukocytosis	leukocyte-count-elevated	HEMATOLOGIC	3571488	-
ACADS	ENSG00000122971	201470	Liver-diseases	hepatocellular-necrosis	GASTROINTESTINAL	3571488;#14595061	-
ACADS	ENSG00000122971	201470	Liver-enzymes-abnormal	AST-elevated	GASTROINTESTINAL	14595061	-
ACADS	ENSG00000122971	201470	Lung-diseases	-	RESPIRATORY	#9499414;#3571488;#9578969	+
ACADS	ENSG00000122971	201470	Metabolic-diseases	-	METABOLIC	#7776094;#2808706;#3571488;#12061367;#15534767;#14595061;#12872838;#9932958;#3335634;#11134486;#11524729;#9578969;#9499414	+
ACADS	ENSG00000122971	201470	Microcephaly	-	MUSCULOSKELETAL	3571488;3335634	-
ACADS	ENSG00000122971	201470	Mitochondria-abnormal	decreased-numbers;multicores;minicores;increased-numbers-of-subsarcolemmal-mitochondria	MISCELLANEOUS	9932958;15534767	-
ACADS	ENSG00000122971	201470	Muscle-hypertonia	hypertonic	NEUROLOGIC	7776094;3571488	-
ACADS	ENSG00000122971	201470	Muscle-hypotonia	hypotonic;axial-hypotonia	NEUROLOGIC	11134486;7776094;9932958;3335634;9578969;15534767;14595061	-
ACADS	ENSG00000122971	201470	Muscle-weakness	proximal;progressive;severe-weakness	NEUROLOGIC	7776094;2808706;3335634;15534767	-
ACADS	ENSG00000122971	201470	Muscular-atrophy	muscle-wasting;type-1-fiber-predominance;type-1-fibre-atrophy;type-2-fibre-atrophy;neurogenic-atrophy;denervation-atrophy	NEUROLOGIC	9932958;11524729;15534767	-
ACADS	ENSG00000122971	201470	Muscular-diseases	myopathy;lipid-storage;adult-form;multicore-myopathy;axial-myopathy;intrafiber-lipid-deposits;variation-in-muscle-fibre-size;hypertrophic-fibres;atrophic-fibers	MUSCULOSKELETAL	9932958;3335634;15534767	-
ACADS	ENSG00000122971	201470	Musculoskeletal-diseases	-	MUSCULOSKELETAL	#9932958;#3571488;#3335634;#15534767;#11524729	+
ACADS	ENSG00000122971	201470	Nervous-system-diseases	-	NEUROLOGIC	#3571488;#9578969;#15534767;#9499414;#11134486;#11524729;#7776094;#2808706;#3335634;#14595061;#9932958;#12061367	+
ACADS	ENSG00000122971	201470	Neurobehavioral-manifestations	-	NEUROLOGIC	#9499414;#9578969;#7776094;#3571488;#12061367;#14595061	+
ACADS	ENSG00000122971	201470	Neurologic-manifestations	-	NEUROLOGIC	#9499414;#9578969;#15534767;#7776094;#9932958;#3571488;#12061367;#11134486;#3335634;#14595061;#2808706;#11524729	+
ACADS	ENSG00000122971	201470	Neuromuscular-manifestations	-	NEUROLOGIC	#15534767;#7776094;#3571488;#11134486;#9932958;#3335634;#9578969;#14595061;#2808706;#11524729	+
ACADS	ENSG00000122971	201470	Ocular-motility-disorders	-	OPHTHALMOLOGIC	#9932958;#7776094;#15534767	+
ACADS	ENSG00000122971	201470	Ophthalmoplegia	ophthalmoparesis	OPHTHALMOLOGIC	9932958	-
ACADS	ENSG00000122971	201470	Optic-nerve-diseases	bilateral-optic-atrophy;optic-atrophy	OPHTHALMOLOGIC	15534767	-
ACADS	ENSG00000122971	201470	Organic-acids-abnormal	ethylmalonic-aciduria;methylsuccinic-aciduria;citric-acid-decreased;ketonuria	METABOLIC	11134486;9932958;11524729;7776094;2808706;3571488;15534767;14595061;12872838;12061367;#3335634;#9578969;#9499414	-
ACADS	ENSG00000122971	201470	Pathologic-nystagmus	rotatory-nystagmus;vertical-nystagmus;horizontal-nystagmus	OPHTHALMOLOGIC	7776094;15534767	-
ACADS	ENSG00000122971	201470	Peripheral-nervous-system-diseases	-	NEUROLOGIC	#15534767	+
ACADS	ENSG00000122971	201470	Pneumonia	bronchopneumonia	RESPIRATORY	9499414;3571488;9578969	-
ACADS	ENSG00000122971	201470	Polyneuropathies	chronic;active;axonal-sensory-motor-polyneuropathy;fibrillations;axonal-neuropathy;collagen-deposition	NEUROLOGIC	15534767	-
ACADS	ENSG00000122971	201470	Pregnancy-complications	hypertension-or-hemolysis-elevated-liver-enzymes-and-low-platelets;HELLP-syndrome	GENITOURINARY	14595061	-
ACADS	ENSG00000122971	201470	Psychomotor-agitation	jittery;hyperactivity;very-active-behavior	NEUROLOGIC	7776094;14595061	-
ACADS	ENSG00000122971	201470	Reflexes-abnormal	-	NEUROLOGIC	#7776094;#9932958;#15534767	+
ACADS	ENSG00000122971	201470	Respiration-disorders	respiratory-distress	RESPIRATORY	11134486;3571488;14595061	-
ACADS	ENSG00000122971	201470	Respiratory-tract-diseases	-	RESPIRATORY	#11134486;#3571488;#14595061;#9499414;#9578969	+
ACADS	ENSG00000122971	201470	Seizures	seizures;convulsions;multifocal-seizures	NEUROLOGIC	11134486;7776094;3571488	-
ACADS	ENSG00000122971	201470	Spinal-diseases	scoliosis;lumbar-lordosis	MUSCULOSKELETAL	9932958;11524729	-
ACADS	ENSG00000122971	201470	Splenomegaly	enlarged-spleen;hepatosplenomegaly	MISCELLANEOUS	14595061	-
ACADS	ENSG00000122971	201470	Thrombocytosis	platelets-elevated	HEMATOLOGIC	3571488	-
ACADS	ENSG00000122971	201470	Tiglylglycinuria	tiglylglycine-levels-elevated	METABOLIC	11134486	-
ACADS	ENSG00000122971	201470	Uremia	blood-urea-nitrogen-elevated	GENITOURINARY	3571488	-
ACADS	ENSG00000122971	201470	Urologic-diseases	-	GENITOURINARY	#3571488	+
ACADS	ENSG00000122971	201470	Vomiting	nausea;vomit;gastroesophageal-reflux;vomiting-attacks;chronic-recurrent-vomiting	GASTROINTESTINAL	9499414;3571488;3335634;9578969;12872838	-
ACADS	ENSG00000122971	201470	Water-electrolyte-imbalance	-	METABOLIC	#3571488	+
ACADSB	ENSG00000196177	610006	Acid-base-imbalance	-	METABOLIC	#16317551	+
ACADSB	ENSG00000196177	610006	Acidosis	lactic-acidosis	METABOLIC	16317551	-
ACADSB	ENSG00000196177	610006	Acylcarnitine-profile-abnormal	elevated-C5-acylcarnitine	METABOLIC	10832746;16317551;12837870;15615815	-
ACADSB	ENSG00000196177	610006	Acylglycine-profile-abnormal	elevated-2-methylbutyrylglycine;elevated-isobutyrylglycine;2-methylbutyrylglycinuria	METABOLIC	11013134;10832746;16317551;15615815;12837870	-
ACADSB	ENSG00000196177	610006	Arrhythmia	tachycardia	CARDIOVASCULAR	10832746	-
ACADSB	ENSG00000196177	610006	Blood-circulation-disorder	cool-extremities;peripheral-pulse-abnormal;barely-palpable-peripheral-pulse;probably-dehydration-related	CARDIOVASCULAR	10832746	-
ACADSB	ENSG00000196177	610006	Body-temperature-changes	-	MISCELLANEOUS	#11013134;#10832746;#16317551	+
ACADSB	ENSG00000196177	610006	Brain-diseases	-	NEUROLOGIC	#16317551;#10832746	+
ACADSB	ENSG00000196177	610006	Cardiovascular-diseases	-	CARDIOVASCULAR	#10832746	+
ACADSB	ENSG00000196177	610006	Carnitine-levels-abnormal	decreased;mild	METABOLIC	11013134;12837870	-
ACADSB	ENSG00000196177	610006	Central-nervous-system-diseases	-	NEUROLOGIC	#16317551;#10832746	+
ACADSB	ENSG00000196177	610006	Craniofacial-abnormalities	-	MUSCULOSKELETAL	#16317551	+
ACADSB	ENSG00000196177	610006	Dehydration	-	METABOLIC	10832746	-
ACADSB	ENSG00000196177	610006	Developmental-delay	psychomotor-retardation;cerebral-palsy;global-delay	NEUROLOGIC	11013134;10832746;16317551;15615815	-
ACADSB	ENSG00000196177	610006	Digestive-system-diseases	-	GASTROINTESTINAL	#11013134;#16317551	+
ACADSB	ENSG00000196177	610006	Electroencephalogram-abnormal	infantile-spasms;epileptiform-activity	NEUROLOGIC	16317551;10832746	-
ACADSB	ENSG00000196177	610006	Eye-diseases	-	OPHTHALMOLOGIC	#11013134;#16317551;#10832746	+
ACADSB	ENSG00000196177	610006	Feeding-difficulties	-	GASTROINTESTINAL	11013134;16317551	-
ACADSB	ENSG00000196177	610006	Female-genital-diseases	-	GENITOURINARY	#12837870	+
ACADSB	ENSG00000196177	610006	Fever	-	MISCELLANEOUS	11013134	-
ACADSB	ENSG00000196177	610006	Genitourinary-diseases	-	GENITOURINARY	#12837870	+
ACADSB	ENSG00000196177	610006	Glucose-metabolism-disorders	-	METABOLIC	#10832746;#16317551	+
ACADSB	ENSG00000196177	610006	Heart-diseases	-	CARDIOVASCULAR	#10832746	+
ACADSB	ENSG00000196177	610006	Hypoglycemia	-	METABOLIC	10832746;16317551	-
ACADSB	ENSG00000196177	610006	Hypothermia	hypothermic	MISCELLANEOUS	10832746;16317551	-
ACADSB	ENSG00000196177	610006	Immune-system-diseases	-	IMMUNOLOGIC	#16317551	+
ACADSB	ENSG00000196177	610006	Infections	recurrent-infections;ear-infections;sinusitis	IMMUNOLOGIC	16317551	-
ACADSB	ENSG00000196177	610006	Lethargy	-	NEUROLOGIC	10832746;16317551	-
ACADSB	ENSG00000196177	610006	Lung-diseases	-	RESPIRATORY	#12837870	+
ACADSB	ENSG00000196177	610006	Metabolic-diseases	-	METABOLIC	#16317551;#10832746;#12837870;#15615815;#11013134	+
ACADSB	ENSG00000196177	610006	Microcephaly	-	MUSCULOSKELETAL	16317551	-
ACADSB	ENSG00000196177	610006	Muscle-hypotonia	floppy;hypotonic	NEUROLOGIC	11013134;10832746;16317551;12837870	-
ACADSB	ENSG00000196177	610006	Muscle-weakness	progressive-muscle-weakness	NEUROLOGIC	12837870	-
ACADSB	ENSG00000196177	610006	Muscular-atrophy	-	NEUROLOGIC	11013134	-
ACADSB	ENSG00000196177	610006	Musculoskeletal-diseases	-	MUSCULOSKELETAL	#16317551	+
ACADSB	ENSG00000196177	610006	Nervous-system-diseases	-	NEUROLOGIC	#11013134;#10832746;#16317551;#15615815;#12837870	+
ACADSB	ENSG00000196177	610006	Neurobehavioral-manifestations	-	NEUROLOGIC	#10832746;#16317551	+
ACADSB	ENSG00000196177	610006	Neurologic-manifestations	-	NEUROLOGIC	#10832746;#16317551;#11013134;#12837870	+
ACADSB	ENSG00000196177	610006	Neuromuscular-manifestations	-	NEUROLOGIC	#11013134;#10832746;#16317551;#12837870	+
ACADSB	ENSG00000196177	610006	Neuronal-loss-and-lesions	MRI-findings;signal-intensity-abnormalities;white-matter-abnormal;cerebral-hemispheres-abnormal;parietal-lobes-abnormal;occipital-lobes-abnormal;lentiform-nuclei-abnormal;signs-of-hypoxia;delayed-myelination-of-corpus-callosum	NEUROLOGIC	10832746;16317551	-
ACADSB	ENSG00000196177	610006	Ocular-motility-disorders	-	OPHTHALMOLOGIC	#11013134;#16317551	+
ACADSB	ENSG00000196177	610006	Organic-acids-abnormal	2-metylbutyrylglycine-elevated;2-ethylhydracrylic-aciduria;2-methylbutyrylglycinuria	METABOLIC	10832746;16317551;15615815	-
ACADSB	ENSG00000196177	610006	Pneumonia	-	RESPIRATORY	12837870	-
ACADSB	ENSG00000196177	610006	Pregnancy-complications	hypertension;iron-deficiency;low-platelet-counts	GENITOURINARY	12837870	-
ACADSB	ENSG00000196177	610006	Respiration-disorders	apnea;apnea-episodes;respiratory-distress	RESPIRATORY	10832746;16317551;12837870	-
ACADSB	ENSG00000196177	610006	Respiratory-tract-diseases	-	RESPIRATORY	#12837870;#10832746;#16317551	+
ACADSB	ENSG00000196177	610006	Seizures	epilepsy;seizures;spasms	NEUROLOGIC	16317551	-
ACADSB	ENSG00000196177	610006	Strabismus	-	OPHTHALMOLOGIC	11013134;16317551	-
ACADSB	ENSG00000196177	610006	Vision-disorders	visual-skills-impaired	OPHTHALMOLOGIC	10832746	-
ACADSB	ENSG00000196177	610006	Water-electrolyte-imbalance	-	METABOLIC	#10832746	+
ACADVL	ENSG00000072778	201475	Acid-base-imbalance	-	METABOLIC	#9877038;#11433098;#7479827;#11524729;#9498103;#7494405	+
ACADVL	ENSG00000072778	201475	Acidosis	metabolic-acidosis	METABOLIC	9877038;11433098	-
ACADVL	ENSG00000072778	201475	Acylcarnitine-profile-abnormal	elevated-long-chain-acylcarnitines;elevated-C12:0-C14:0-C14:1-C16:0-acylcarnitines	METABOLIC	7479827;11158518;9877038;10910451;9546340;11433098	-
ACADVL	ENSG00000072778	201475	Alkaline-phosphatase-abnormal	elevated	MISCELLANEOUS	11433098	-
ACADVL	ENSG00000072778	201475	Arrhythmia	arrhythmia;tachycardia;conduction-impairment	CARDIOVASCULAR	7479827;9498103;9877038	-
ACADVL	ENSG00000072778	201475	Body-temperature-changes	-	MISCELLANEOUS	#16443431	+
ACADVL	ENSG00000072778	201475	Brain-diseases	-	NEUROLOGIC	#9709714;#16488171	+
ACADVL	ENSG00000072778	201475	Cardiomyopathy	hypertrophic;dysfunction;cardiomegaly;myocardium-thickened;concentric-ventricular-hypertrophy;biventricular-hypertrophy	CARDIOVASCULAR	7479827;9709714;9877038;7494405;9498103;11433098;16488171	-
ACADVL	ENSG00000072778	201475	Cardiorespiratory-arrest	sudden-infant-death;sudden-death	CARDIOVASCULAR	7479827;11524729;7494405;9498103;16488171	-
ACADVL	ENSG00000072778	201475	Cardiovascular-diseases	-	CARDIOVASCULAR	#7479827;#9498103;#9877038;#9709714;#7494405;#11433098;#16488171;#11524729	+
ACADVL	ENSG00000072778	201475	Carnitine-levels-abnormal	decreased-total-carnitine;decreased-free-carnitine;elevated-esterified-carnitine;tetra-decanoyl-carnitine-levels-abnormal	METABOLIC	9546340;11524729	-
ACADVL	ENSG00000072778	201475	Central-nervous-system-diseases	-	NEUROLOGIC	#9709714;#16488171	+
ACADVL	ENSG00000072778	201475	Consciousness-disorders	coma;sleepy	NEUROLOGIC	7479827;16488171	-
ACADVL	ENSG00000072778	201475	Creatine-kinase-abnormal	elevated	MISCELLANEOUS	11158518;16443431;9877038;10910451;9546340	-
ACADVL	ENSG00000072778	201475	Creatinine-levels-abnormal	creatinine-elevated	GENITOURINARY	10910451	-
ACADVL	ENSG00000072778	201475	Developmental-delay	-	NEUROLOGIC	7479827	-
ACADVL	ENSG00000072778	201475	Diarrhea	acute;severe	GASTROINTESTINAL	9877038	-
ACADVL	ENSG00000072778	201475	Dicarboxylic-aciduria	dicarboxylic-acids-elevated	METABOLIC	9498103;7494405	-
ACADVL	ENSG00000072778	201475	Digestive-system-diseases	-	GASTROINTESTINAL	#9877038;#11524729;#7494405;#7479827;#9709714;#11433098;#10910451;#9546340	+
ACADVL	ENSG00000072778	201475	Encephalopathy	-	NEUROLOGIC	9709714	-
ACADVL	ENSG00000072778	201475	Exercise-intolerance	fatigue;extreme-tiredness;episodes	MISCELLANEOUS	16443431;10910451;9546340	-
ACADVL	ENSG00000072778	201475	Failure-to-thrive	-	MISCELLANEOUS	9709714	-
ACADVL	ENSG00000072778	201475	Fatty-liver	hepatic-fatty-infiltration	GASTROINTESTINAL	7479827	-
ACADVL	ENSG00000072778	201475	Fever	-	MISCELLANEOUS	16443431	-
ACADVL	ENSG00000072778	201475	Genitourinary-diseases	-	GENITOURINARY	#10910451	+
ACADVL	ENSG00000072778	201475	Glucose-metabolism-disorders	-	METABOLIC	#7479827;#11524729;#9498103;#11433098;#16488171;#7494405	+
ACADVL	ENSG00000072778	201475	Growth-disorders	-	MISCELLANEOUS	#9709714	+
ACADVL	ENSG00000072778	201475	Heart-diseases	-	CARDIOVASCULAR	#7479827;#9498103;#9877038;#9709714;#7494405;#11433098;#16488171	+
ACADVL	ENSG00000072778	201475	Hematuria	haematuria	GENITOURINARY	10910451	-
ACADVL	ENSG00000072778	201475	Hepatomegaly	-	GASTROINTESTINAL	9709714;11524729;9877038;11433098	-
ACADVL	ENSG00000072778	201475	Hyperammonemia	ammonia-levels-elevated	METABOLIC	9498103	-
ACADVL	ENSG00000072778	201475	Hyperhidrosis	sweating;sweating-for-24-hours	DERMATOLOGIC	16443431	-
ACADVL	ENSG00000072778	201475	Hypoglycemia	hypoketotic-hypoglycemia	METABOLIC	7479827;11524729;9498103;11433098;16488171;7494405	-
ACADVL	ENSG00000072778	201475	Hypoketosis	hypoketotic-hypoglycemia	METABOLIC	7479827;11524729;9498103;11433098;7494405	-
ACADVL	ENSG00000072778	201475	Hyporeflexia	-	NEUROLOGIC	11433098	-
ACADVL	ENSG00000072778	201475	Immune-system-diseases	-	IMMUNOLOGIC	#7479827;#9877038;#16488171	+
ACADVL	ENSG00000072778	201475	Infections	viral-infections;respiratory-tract-infections	IMMUNOLOGIC	7479827;9877038;16488171	-
ACADVL	ENSG00000072778	201475	Kidney-diseases	-	GENITOURINARY	#10910451	+
ACADVL	ENSG00000072778	201475	Lethargy	drowsiness	NEUROLOGIC	7479827;9877038	-
ACADVL	ENSG00000072778	201475	Liver-diseases	hepatic-symptoms;impaired-liver-function	GASTROINTESTINAL	11524729;7494405;#7479827;#9709714;#9877038;#11433098;#10910451;#9546340	-
ACADVL	ENSG00000072778	201475	Liver-enzymes-abnormal	ALT-elevated;AST-elevated	GASTROINTESTINAL	9877038;10910451;9546340;11433098	-
ACADVL	ENSG00000072778	201475	Metabolic-brain-diseases	-	METABOLIC	#7479827	+
ACADVL	ENSG00000072778	201475	Metabolic-diseases	-	METABOLIC	#9877038;#11433098;#7479827;#11158518;#10910451;#9546340;#11524729;#9498103;#7494405;#16488171	+
ACADVL	ENSG00000072778	201475	Mitochondria-abnormal	mitochondria-with-increased-variation-in-size-and-shape	MISCELLANEOUS	9546340	-
ACADVL	ENSG00000072778	201475	Muscle-aching-and-stiffness	myalgia;muscle-pain;heaviness-in-the-legs	NEUROLOGIC	11158518;10910451;9546340	-
ACADVL	ENSG00000072778	201475	Muscle-hypotonia	-	NEUROLOGIC	7479827;9709714;9877038;11433098	-
ACADVL	ENSG00000072778	201475	Muscle-weakness	-	NEUROLOGIC	7479827;11158518;11524729;16443431	-
ACADVL	ENSG00000072778	201475	Muscular-diseases	myopathy;muscle-fat-droplets;necrotic-fibers	MUSCULOSKELETAL	7479827;11158518;9877038;9546340;#16443431;#10910451	-
ACADVL	ENSG00000072778	201475	Musculoskeletal-diseases	-	MUSCULOSKELETAL	#7479827;#11158518;#9877038;#9546340;#16443431;#10910451	+
ACADVL	ENSG00000072778	201475	Myoglobinuria	exercise-myoglobinuria;dark-brown-urine	MUSCULOSKELETAL	11158518;16443431;9877038;10910451;9546340	-
ACADVL	ENSG00000072778	201475	Nervous-system-diseases	-	NEUROLOGIC	#7479827;#16488171;#9709714;#11433098;#9877038;#11158518;#10910451;#9546340;#11524729;#16443431	+
ACADVL	ENSG00000072778	201475	Neurobehavioral-manifestations	-	NEUROLOGIC	#7479827;#16488171;#9877038	+
ACADVL	ENSG00000072778	201475	Neurologic-manifestations	-	NEUROLOGIC	#7479827;#16488171;#11433098;#9877038;#11158518;#10910451;#9546340;#9709714;#11524729;#16443431	+
ACADVL	ENSG00000072778	201475	Neuromuscular-manifestations	-	NEUROLOGIC	#11158518;#10910451;#9546340;#7479827;#9709714;#9877038;#11433098;#11524729;#16443431	+
ACADVL	ENSG00000072778	201475	Organic-acids-abnormal	lactic-aciduria;dicarboxylic-aciduria;adipic-aciduria;suberic-aciduria;sebacic-aciduria;3-hydroxydicarboxylic-aciduria;3-hydroxyadipic-aciduria;3-hydroxysuberic-aciduria;3-hydroxysebacic-aciduria	METABOLIC	11158518;9498103;9877038;#7494405	-
ACADVL	ENSG00000072778	201475	Paleness	looked-pale	DERMATOLOGIC	11158518	-
ACADVL	ENSG00000072778	201475	Reflexes-abnormal	-	NEUROLOGIC	#11433098	+
ACADVL	ENSG00000072778	201475	Renal-insufficiency	renal-failure;proteinuria	GENITOURINARY	10910451	-
ACADVL	ENSG00000072778	201475	Respiration-disorders	-	RESPIRATORY	#9877038;#11433098	+
ACADVL	ENSG00000072778	201475	Respiratory-insufficiency	respiratory-failure;progressive-respiratory-failure;respiratory-distress;poor-respiratory-effort	RESPIRATORY	9877038;11433098	-
ACADVL	ENSG00000072778	201475	Respiratory-tract-diseases	-	RESPIRATORY	#9877038;#11433098	+
ACADVL	ENSG00000072778	201475	Reye-like-symptoms	reye-syndrome-like	METABOLIC	7479827	-
ACADVL	ENSG00000072778	201475	Rhabdomyolysis	painful;attacks;dark-urine	MUSCULOSKELETAL	9546340;16443431;10910451	-
ACADVL	ENSG00000072778	201475	Seizures	-	NEUROLOGIC	16488171	-
ACADVL	ENSG00000072778	201475	Skin-diseases	-	DERMATOLOGIC	#16443431;#11158518	+
ACADVL	ENSG00000072778	201475	Sweat-gland-diseases	-	DERMATOLOGIC	#16443431	+
ACADVL	ENSG00000072778	201475	Uremia	increased-serum-urea;blood-urea-elevated	GENITOURINARY	10910451	-
ACADVL	ENSG00000072778	201475	Urologic-diseases	-	GENITOURINARY	#10910451	+
ACADVL	ENSG00000072778	201475	Vomiting	-	GASTROINTESTINAL	7479827	-
ACAT1	ENSG00000075239	203750	Abdominal-pain	-	GASTROINTESTINAL	7173255	-
ACAT1	ENSG00000075239	203750	Acid-base-imbalance	-	METABOLIC	#10604145;#9700610;#15877211;#11914035;#11161836;#8930414;#1349518;#12754704;#7173255;#8103405;#1346617	+
ACAT1	ENSG00000075239	203750	Acidosis	metabolic-acidosis;ketoacidosis	METABOLIC	10604145;9700610;15877211;11914035;11161836;8930414;1349518;12754704;7173255;8103405	-
ACAT1	ENSG00000075239	203750	Acylcarnitine-profile-abnormal	2-methyl-3-hydroxybutyrylcarnitines;elevated-C5(tiglyl)carnitines;propionyl-acylcarnitines;isobutyryl-acylcarnitines;isovaleryl-acylcarnitines	METABOLIC	15877211;8930414	-
ACAT1	ENSG00000075239	203750	Aminoacid-levels-abnormal	elevated-glycine;hyperglycinemia;valine-elevated;leucine-elevated;isoleucine-elevated	METABOLIC	11161836;8930414	-
ACAT1	ENSG00000075239	203750	Ataxia	truncal	NEUROLOGIC	11161836;7173255	-
ACAT1	ENSG00000075239	203750	Body-temperature-changes	-	MISCELLANEOUS	#7173255	+
ACAT1	ENSG00000075239	203750	Brain-diseases	-	NEUROLOGIC	#1349518;#11161836	+
ACAT1	ENSG00000075239	203750	Cardiorespiratory-arrest	sudden-infant-death	CARDIOVASCULAR	10604145	-
ACAT1	ENSG00000075239	203750	Cardiovascular-diseases	-	CARDIOVASCULAR	#10604145	+
ACAT1	ENSG00000075239	203750	Carnitine-levels-abnormal	decreased-total-carnitine;decreased-free-carnitine	METABOLIC	9700610;8930414	-
ACAT1	ENSG00000075239	203750	Central-nervous-system-diseases	-	NEUROLOGIC	#1349518;#11161836	+
ACAT1	ENSG00000075239	203750	Consciousness-disorders	coma;consciousness-problems;low-level-of-consciousness	NEUROLOGIC	10604145;9700610;15877211;8930414;12754704;7173255	-
ACAT1	ENSG00000075239	203750	Creatinine-levels-abnormal	elevated	GENITOURINARY	7173255	-
ACAT1	ENSG00000075239	203750	Dehydration	-	METABOLIC	7173255;11161836;9700610	-
ACAT1	ENSG00000075239	203750	Developmental-delay	psychomotor-retardation;ponderal-delay;statural-delay;staturo-ponderal-delay	NEUROLOGIC	10604145;8930414	-
ACAT1	ENSG00000075239	203750	Diarrhea	-	GASTROINTESTINAL	15877211	-
ACAT1	ENSG00000075239	203750	Dicarboxylic-aciduria	-	METABOLIC	8930414	-
ACAT1	ENSG00000075239	203750	Digestive-system-diseases	-	GASTROINTESTINAL	#7173255;#15877211;#10604145;#11914035;#12754704;#9700610;#8930414	+
ACAT1	ENSG00000075239	203750	Electroencephalogram-abnormal	EEG-alterations;EEG-abnormalities	NEUROLOGIC	1349518	-
ACAT1	ENSG00000075239	203750	Fever	episodes;febrile-illnesses	MISCELLANEOUS	7173255	-
ACAT1	ENSG00000075239	203750	Gastroenteritis	-	GASTROINTESTINAL	10604145;11914035;12754704	-
ACAT1	ENSG00000075239	203750	Gastrointestinal-diseases	-	GASTROINTESTINAL	#10604145;#11914035;#12754704	+
ACAT1	ENSG00000075239	203750	Genitourinary-diseases	-	GENITOURINARY	#7173255;#10604145;#15877211	+
ACAT1	ENSG00000075239	203750	Glucose-metabolism-disorders	-	METABOLIC	#10604145;#8930414;#15877211;#11914035	+
ACAT1	ENSG00000075239	203750	Hydroxyisovaleric-aciduria	3-hydroxyisovaleric-acid-elevated;3-hydroxyisovalerate-elevated	METABOLIC	8930414	-
ACAT1	ENSG00000075239	203750	Hyperammonemia	ammonia-levels-elevated;mild	METABOLIC	10604145;11161836;12754704	-
ACAT1	ENSG00000075239	203750	Hyperglycemia	moderate-hyperglycemia	METABOLIC	10604145;8930414	-
ACAT1	ENSG00000075239	203750	Hyperuricemia	hyperuricaemia	METABOLIC	15877211	-
ACAT1	ENSG00000075239	203750	Hyperventilation	polypnea	RESPIRATORY	8930414;7173255	-
ACAT1	ENSG00000075239	203750	Hypoglycemia	severe-hypoglycemia	METABOLIC	15877211;11914035	-
ACAT1	ENSG00000075239	203750	Immune-system-diseases	-	IMMUNOLOGIC	#10604145;#8930414;#1349518;#12754704;#7173255;#1346617	+
ACAT1	ENSG00000075239	203750	Infections	respiratory-tract-infections;rhinopharyngitis;frequent-episodes;otitis-media	IMMUNOLOGIC	10604145;8930414;1349518;12754704;7173255;1346617	-
ACAT1	ENSG00000075239	203750	Ketosis	ketoacidotic-attacks;ketonuria;ketoacidotic-crisis;acetone-like-breath-odor	METABOLIC	10604145;9700610;15877211;11914035;11161836;8930414;12754704;7173255;1346617	-
ACAT1	ENSG00000075239	203750	Kidney-diseases	-	GENITOURINARY	#7173255;#10604145;#15877211	+
ACAT1	ENSG00000075239	203750	Lethargy	-	NEUROLOGIC	10604145;9700610;15877211	-
ACAT1	ENSG00000075239	203750	Liver-diseases	-	GASTROINTESTINAL	#15877211	+
ACAT1	ENSG00000075239	203750	Liver-enzymes-abnormal	ALT-elevated;AST-elevated	GASTROINTESTINAL	15877211	-
ACAT1	ENSG00000075239	203750	Mental-retardation	about-one-third-of-patients	NEUROLOGIC	11161836	-
ACAT1	ENSG00000075239	203750	Metabolic-brain-diseases	CSF-protein-level-elevated	METABOLIC	7173255	-
ACAT1	ENSG00000075239	203750	Metabolic-diseases	-	METABOLIC	#10604145;#9700610;#15877211;#11914035;#11161836;#8930414;#1349518;#12754704;#7173255;#8103405;#1346617	+
ACAT1	ENSG00000075239	203750	Muscle-hypotonia	muscle-hypotonus;generalized-hypotonia	NEUROLOGIC	11161836;1349518;7173255	-
ACAT1	ENSG00000075239	203750	Nervous-system-diseases	-	NEUROLOGIC	#11161836;#7173255;#10604145;#9700610;#15877211;#8930414;#12754704;#1349518	+
ACAT1	ENSG00000075239	203750	Neurobehavioral-manifestations	-	NEUROLOGIC	#10604145;#9700610;#15877211;#8930414;#12754704;#7173255;#11161836	+
ACAT1	ENSG00000075239	203750	Neurologic-manifestations	-	NEUROLOGIC	#11161836;#7173255;#10604145;#9700610;#15877211;#8930414;#12754704;#1349518	+
ACAT1	ENSG00000075239	203750	Neuromuscular-manifestations	-	NEUROLOGIC	#11161836;#1349518;#7173255	+
ACAT1	ENSG00000075239	203750	Organic-acids-abnormal	tiglylglycine-uria;2-methyl-3-hydroxybutyric-aciduria;2-methylacetoacetic-aciduria;elevated-2-butanone;2-methylglutaconate-elevated	METABOLIC	10604145;15877211;11914035;11161836;7173255;8930414;1349518;12754704;1346617;8103405	-
ACAT1	ENSG00000075239	203750	Paralysis-Paresis	diplegia	NEUROLOGIC	7173255	-
ACAT1	ENSG00000075239	203750	Renal-insufficiency	renal-failure	GENITOURINARY	10604145	-
ACAT1	ENSG00000075239	203750	Respiration-disorders	polypnea;apnea	RESPIRATORY	11161836;#8930414;#7173255	-
ACAT1	ENSG00000075239	203750	Respiratory-tract-diseases	-	RESPIRATORY	#11161836;#8930414;#7173255	+
ACAT1	ENSG00000075239	203750	Seizures	seizures;convulsions	NEUROLOGIC	11161836	-
ACAT1	ENSG00000075239	203750	Speech-disorders	speech-problems	NEUROLOGIC	7173255	-
ACAT1	ENSG00000075239	203750	Tiglylglycinuria	tiglylglycine-levels-elevated	METABOLIC	7173255;8930414;1349518;15877211;12754704;1346617	-
ACAT1	ENSG00000075239	203750	Uremia	increased-serum-urea;urea-elevated	GENITOURINARY	15877211;7173255	-
ACAT1	ENSG00000075239	203750	Urologic-diseases	-	GENITOURINARY	#7173255;#10604145;#15877211	+
ACAT1	ENSG00000075239	203750	Vomiting	-	GASTROINTESTINAL	7173255;9700610;8930414	-
ACAT1	ENSG00000075239	203750	Water-electrolyte-imbalance	-	METABOLIC	#7173255;#11161836;#9700610	+
ACSL4	ENSG00000068366	300387	Anxiety-disorders	anxiousness	PSYCHIATRIC	11889465	-
ACSL4	ENSG00000068366	300387	Autistic-disorder	autism;autistic-like-features	PSYCHIATRIC	11889465;12525535	-
ACSL4	ENSG00000068366	300387	Behavioral-symptoms	internalising-behavioural-problems;severe-social-problems	PSYCHIATRIC	12525535	-
ACSL4	ENSG00000068366	300387	Blepharoptosis	unilateral-ptosis	OPHTHALMOLOGIC	11889465	-
ACSL4	ENSG00000068366	300387	Bone-diseases	-	MUSCULOSKELETAL	#11889465	+
ACSL4	ENSG00000068366	300387	Brain-diseases	-	NEUROLOGIC	#11889465	+
ACSL4	ENSG00000068366	300387	Central-nervous-system-diseases	-	NEUROLOGIC	#11889465	+
ACSL4	ENSG00000068366	300387	Cerebellar-atrophy	MRI-findings	NEUROLOGIC	11889465	-
ACSL4	ENSG00000068366	300387	Craniofacial-abnormalities	-	MUSCULOSKELETAL	#11889465	+
ACSL4	ENSG00000068366	300387	Depressive-disorder	depression	PSYCHIATRIC	11889465	-
ACSL4	ENSG00000068366	300387	Developmental-delay	language-impairment;autonomy-level-impaired;speech-delay	NEUROLOGIC	11889465	-
ACSL4	ENSG00000068366	300387	Eye-diseases	-	OPHTHALMOLOGIC	#11889465	+
ACSL4	ENSG00000068366	300387	Hyperreflexia	reflexes-increased	NEUROLOGIC	11889465	-
ACSL4	ENSG00000068366	300387	Hyporeflexia	reflexes-decreased	NEUROLOGIC	11889465	-
ACSL4	ENSG00000068366	300387	Mental-disorders	-	PSYCHIATRIC	#11889465;#12525535	+
ACSL4	ENSG00000068366	300387	Mental-retardation	severe;nonspecific;low-IQ;thought-problems	NEUROLOGIC	12525535;11889465	-
ACSL4	ENSG00000068366	300387	Metabolic-brain-diseases	cognition-related-brain-lipid-metabolism-disturbed;brain-lipid-metabolism-abnormal	METABOLIC	12525535	-
ACSL4	ENSG00000068366	300387	Metabolic-diseases	-	METABOLIC	#12525535	+
ACSL4	ENSG00000068366	300387	Microcephaly	head-circumference-decreased	MUSCULOSKELETAL	11889465	-
ACSL4	ENSG00000068366	300387	Mood-disorders	-	PSYCHIATRIC	#11889465	+
ACSL4	ENSG00000068366	300387	Muscle-hypotonia	hypotonia;neonatal-hypotonia;infancy-hypotonia	NEUROLOGIC	11889465	-
ACSL4	ENSG00000068366	300387	Musculoskeletal-diseases	-	MUSCULOSKELETAL	#11889465	+
ACSL4	ENSG00000068366	300387	Nervous-system-diseases	-	NEUROLOGIC	#11889465;#12525535	+
ACSL4	ENSG00000068366	300387	Neurobehavioral-manifestations	-	NEUROLOGIC	#12525535;#11889465	+
ACSL4	ENSG00000068366	300387	Neurologic-manifestations	-	NEUROLOGIC	#11889465;#12525535	+
ACSL4	ENSG00000068366	300387	Neuromuscular-manifestations	-	NEUROLOGIC	#11889465	+
ACSL4	ENSG00000068366	300387	Psychiatric-disorders	-	PSYCHIATRIC	#11889465;#12525535	+
ACSL4	ENSG00000068366	300387	Psychomotor-agitation	attention-deficit;hyperactivity;inability-to-concentrate	NEUROLOGIC	11889465;12525535	-
ACSL4	ENSG00000068366	300387	Reflexes-abnormal	-	NEUROLOGIC	#11889465	+
ACSL4	ENSG00000068366	300387	Spinal-diseases	kyphosis;scoliosis	MUSCULOSKELETAL	11889465	-
ACSL6	ENSG00000164398	604443	Anemia	refractory-anemia-with-excess-of-blasts	HEMATOLOGIC	10502316	-
ACSL6	ENSG00000164398	604443	Bone-marrow-diseases	myelodysplasia;hypercellular-bone-marrow;dystrophic-megakaryocytes	HEMATOLOGIC	10502316;16572202	-
ACSL6	ENSG00000164398	604443	Brain-diseases	-	NEUROLOGIC	#16572202	+
ACSL6	ENSG00000164398	604443	Central-nervous-system-diseases	-	NEUROLOGIC	#16572202	+
ACSL6	ENSG00000164398	604443	Digestive-system-diseases	-	GASTROINTESTINAL	#16572202	+
ACSL6	ENSG00000164398	604443	Eosinophilia	blasts-with-basophilia	HEMATOLOGIC	10502316	-
ACSL6	ENSG00000164398	604443	Headache-disorders	headaches	NEUROLOGIC	16572202	-
ACSL6	ENSG00000164398	604443	Hematologic-diseases	-	HEMATOLOGIC	#10502316;#16572202	+
ACSL6	ENSG00000164398	604443	Hepatomegaly	enlarged-liver	GASTROINTESTINAL	16572202	-
ACSL6	ENSG00000164398	604443	Immune-system-diseases	-	IMMUNOLOGIC	#10502316	+
ACSL6	ENSG00000164398	604443	Infections	dead-of-sepsis	IMMUNOLOGIC	10502316	-
ACSL6	ENSG00000164398	604443	Leukemia-Lymphoma	acute-eosinophilic-leukemia;AEL;acute-myelogenous-leukemia;AML;acute-myeloid-leukemia	ONCOLOGIC	10502316;16572202	-
ACSL6	ENSG00000164398	604443	Leukocyte-disorders	-	HEMATOLOGIC	#10502316	+
ACSL6	ENSG00000164398	604443	Liver-diseases	-	GASTROINTESTINAL	#16572202	+
ACSL6	ENSG00000164398	604443	Lung-diseases	-	RESPIRATORY	#10502316	+
ACSL6	ENSG00000164398	604443	Neoplasms	-	ONCOLOGIC	#10502316;#16572202	+
ACSL6	ENSG00000164398	604443	Nervous-system-diseases	-	NEUROLOGIC	#16572202	+
ACSL6	ENSG00000164398	604443	Pneumonia	dead-of-pneumonia	RESPIRATORY	10502316	-
ACSL6	ENSG00000164398	604443	Polycythemia	polycythemia-vera	HEMATOLOGIC	16572202	-
ACSL6	ENSG00000164398	604443	Pruritus	prurit;prurit-and-paresthesia	DERMATOLOGIC	16572202	-
ACSL6	ENSG00000164398	604443	Respiration-disorders	effort-dyspnea	RESPIRATORY	16572202	-
ACSL6	ENSG00000164398	604443	Respiratory-tract-diseases	-	RESPIRATORY	#10502316;#16572202	+
ACSL6	ENSG00000164398	604443	Skin-diseases	-	DERMATOLOGIC	#16572202	+
ACSL6	ENSG00000164398	604443	Splenomegaly	enlarged-splen	MISCELLANEOUS	16572202	-
AGXT	ENSG00000172482	259900	Acid-base-imbalance	-	METABOLIC	#10586179;#15327387	+
AGXT	ENSG00000172482	259900	Acidosis	metabolic-acidosis	METABOLIC	10586179;15327387	-
AGXT	ENSG00000172482	259900	Anemia	-	HEMATOLOGIC	10586179	-
AGXT	ENSG00000172482	259900	Arrhythmia	heart-block;oxalate-related;conduction-impairment;atrial-fibrillations;bradycardia	CARDIOVASCULAR	5572669;15356974	-
AGXT	ENSG00000172482	259900	Arthritis	-	MUSCULOSKELETAL	9831280	-
AGXT	ENSG00000172482	259900	Body-temperature-changes	-	MISCELLANEOUS	#10586179	+
AGXT	ENSG00000172482	259900	Bone-diseases	-	MUSCULOSKELETAL	#11682674;#6829606	+
AGXT	ENSG00000172482	259900	Brain-diseases	-	NEUROLOGIC	#10586179	+
AGXT	ENSG00000172482	259900	Cachexia	weight-loss;anorexia	MISCELLANEOUS	15356974;6829606	-
AGXT	ENSG00000172482	259900	Cardiovascular-diseases	-	CARDIOVASCULAR	#5572669;#15356974;#6770732;#15580002	+
AGXT	ENSG00000172482	259900	Central-nervous-system-diseases	-	NEUROLOGIC	#10586179	+
AGXT	ENSG00000172482	259900	Creatinine-levels-abnormal	creatinine-elevated;kidney-dysfunction-related	GENITOURINARY	14657686;11682674;15603729;15356974;6829606;6770732	-
AGXT	ENSG00000172482	259900	Dehydration	-	METABOLIC	10586179	-
AGXT	ENSG00000172482	259900	Developmental-delay	-	NEUROLOGIC	14657686	-
AGXT	ENSG00000172482	259900	Diarrhea	-	GASTROINTESTINAL	10586179	-
AGXT	ENSG00000172482	259900	Digestive-system-diseases	-	GASTROINTESTINAL	#10586179;#15356974	+
AGXT	ENSG00000172482	259900	Eye-diseases	-	OPHTHALMOLOGIC	#2297338;#15580002	+
AGXT	ENSG00000172482	259900	Failure-to-thrive	-	MISCELLANEOUS	10586179;12768081	-
AGXT	ENSG00000172482	259900	Fever	-	MISCELLANEOUS	10586179	-
AGXT	ENSG00000172482	259900	Genitourinary-diseases	-	GENITOURINARY	#14657686;#11682674;#15603729;#15356974;#6829606;#6770732;#10586179;#15327387;#9192270;#15365967;#15253729;#12768081;#11562405;#9831280;#15580002	+
AGXT	ENSG00000172482	259900	Growth-deficiency	growth-failure;shortness-of-stature	MISCELLANEOUS	6829606;14657686	-
AGXT	ENSG00000172482	259900	Growth-disorders	-	MISCELLANEOUS	#10586179;#12768081;#6829606;#14657686	+
AGXT	ENSG00000172482	259900	Heart-diseases	-	CARDIOVASCULAR	#5572669;#15356974	+
AGXT	ENSG00000172482	259900	Hematologic-diseases	-	HEMATOLOGIC	#10586179;#6829606;#15327387	+
AGXT	ENSG00000172482	259900	Hematuria	macrohematuria	GENITOURINARY	10586179;6829606;6770732	-
AGXT	ENSG00000172482	259900	Hemoglobin-levels-abnormal	hemoglobin-deficiency	HEMATOLOGIC	6829606	-
AGXT	ENSG00000172482	259900	Hypercalcemia	-	METABOLIC	6829606	-
AGXT	ENSG00000172482	259900	Hyperoxaluria	oxalic-aciduria;hyperexcretion-of-oxalic-acid;calcium-oxalate-crystals-in-urine;serum-oxalate-elevated;oxalosis	METABOLIC	9192270;15365967;15253729;10586179;3974685;5572669;6770732;15327387;2297338;14657686;11682674;12768081;11562405;15603729;15356974;9831280;15580002	-
AGXT	ENSG00000172482	259900	Hyperphosphatemia	-	METABOLIC	6829606	-
AGXT	ENSG00000172482	259900	Hyponatremia	sodium-levels-decreased	METABOLIC	6770732	-
AGXT	ENSG00000172482	259900	Immune-system-diseases	-	IMMUNOLOGIC	#10586179;#15327387;#12768081;#15580002;#6770732	+
AGXT	ENSG00000172482	259900	Infections	urinary-tract-infections	IMMUNOLOGIC	10586179;15327387;12768081;15580002;6770732	-
AGXT	ENSG00000172482	259900	Joint-diseases	-	MUSCULOSKELETAL	#9831280	+
AGXT	ENSG00000172482	259900	Kidney-diseases	-	GENITOURINARY	#14657686;#11682674;#15603729;#15356974;#6829606;#6770732;#10586179;#15327387;#9192270;#15365967;#15253729;#12768081;#11562405;#9831280;#15580002	+
AGXT	ENSG00000172482	259900	Metabolic-bone-diseases	osteopenia	MUSCULOSKELETAL	11682674	-
AGXT	ENSG00000172482	259900	Metabolic-diseases	-	METABOLIC	#10586179;#15327387;#6829606;#9192270;#15365967;#15253729;#3974685;#5572669;#6770732;#2297338;#14657686;#11682674;#12768081;#11562405;#15603729;#15356974;#9831280;#15580002	+
AGXT	ENSG00000172482	259900	Muscular-diseases	myopathy;muscle-biopsy-findings;calcium-oxalate-crystals;inflammatory-infiltrates	MUSCULOSKELETAL	9831280	-
AGXT	ENSG00000172482	259900	Musculoskeletal-diseases	bone-deformities;skeletal-abnormalities	MUSCULOSKELETAL	11682674;#9831280;#6829606	-
AGXT	ENSG00000172482	259900	Nephritis	pyelonephritis;infections;uremia;tubulo-interstitial-nephritis	GENITOURINARY	10586179;15327387;15356974	-
AGXT	ENSG00000172482	259900	Nephrocalcinosis	calcium-oxalate-urolithiasis;nephrolithiasis;urolithiasis;urinary-calculi;renal-stones;episodes;recurrent;kidney-calcification	GENITOURINARY	9192270;15365967;15327387;15253729;14657686;11682674;12768081;11562405;15603729;15356974;6829606;9831280;15580002;6770732	-
AGXT	ENSG00000172482	259900	Nervous-system-diseases	-	NEUROLOGIC	#14657686;#9831280;#10586179	+
AGXT	ENSG00000172482	259900	Optic-nerve-diseases	optic-disc-pallor;optic-nerve-dysfunction	OPHTHALMOLOGIC	2297338;15580002	-
AGXT	ENSG00000172482	259900	Organic-acids-abnormal	glycolic-aciduria;hyperglycolic-aciduria;hyper-excretion-of-glycolic-acid;hyperexcretion-of-oxalic-acid	METABOLIC	9192270;15365967;11562405;15603729;15253729	-
AGXT	ENSG00000172482	259900	Osteochondrodysplasias	-	MUSCULOSKELETAL	#11682674	+
AGXT	ENSG00000172482	259900	Osteosclerosis	sclerosis-of-the-adjacent-diaphysis	MUSCULOSKELETAL	11682674	-
AGXT	ENSG00000172482	259900	Paleness	pallor	DERMATOLOGIC	6829606;6770732	-
AGXT	ENSG00000172482	259900	Pancytopenia	-	HEMATOLOGIC	15327387	-
AGXT	ENSG00000172482	259900	Pathological-fractures	pathologic-fractures;bone-oxalosis;bone-mineral-density-increased;intertrochanteric-fractures;femoral-neck-fracture	MUSCULOSKELETAL	6829606;11682674	-
AGXT	ENSG00000172482	259900	Peripheral-nervous-system-diseases	-	NEUROLOGIC	#9831280	+
AGXT	ENSG00000172482	259900	Peripheral-vascular-diseases	peripheral-vascular-insufficiency;arterial-occlusion;arterial-spasms;intermittent-claudication;raynaud-phenomenon;gangrene;acrocyanosis;hemodynamic-abnormal;carotid-stenosis;carotid-ultrasound-findings	CARDIOVASCULAR	5572669;6770732;15580002	-
AGXT	ENSG00000172482	259900	Phosphorus-metabolism-disorders	-	METABOLIC	#6829606	+
AGXT	ENSG00000172482	259900	Polyneuropathies	ischaemic-neuropathy	NEUROLOGIC	9831280	-
AGXT	ENSG00000172482	259900	Renal-insufficiency	renal-failure;uremia;polyuria;end-stage-renal-disease;end-stage-renal-failure;acute-kidney-failure;renal-colic;proteinuria;anuria	GENITOURINARY	10586179;9192270;14657686;15365967;15327387;15253729;11682674;12768081;11562405;15603729;15356974;6829606;9831280;15580002;6770732	-
AGXT	ENSG00000172482	259900	Respiration-disorders	respiratory-distress;shortness-of-breath	RESPIRATORY	10586179;6829606	-
AGXT	ENSG00000172482	259900	Respiratory-tract-diseases	-	RESPIRATORY	#10586179;#6829606	+
AGXT	ENSG00000172482	259900	Retinal-diseases	bilateral;symmetric;crystalline;oxalate-retinopathy;maculopathy;crystalline-deposits;intraretinal-hemorrhages;retinal-oxalate-deposits	OPHTHALMOLOGIC	2297338;15580002	-
AGXT	ENSG00000172482	259900	Seizures	seizures;convulsions	NEUROLOGIC	10586179	-
AGXT	ENSG00000172482	259900	Skin-diseases	livedo-reticularis	DERMATOLOGIC	5572669;6770732;#6829606	-
AGXT	ENSG00000172482	259900	Uremia	urea-levels-abnormal;blood-urea-elevated;uremic-symptoms	GENITOURINARY	10586179;11682674;12768081;15603729;15356974;6829606;6770732	-
AGXT	ENSG00000172482	259900	Urologic-diseases	-	GENITOURINARY	#14657686;#11682674;#15603729;#15356974;#6829606;#6770732;#10586179;#15327387;#9192270;#15365967;#15253729;#12768081;#11562405;#9831280;#15580002	+
AGXT	ENSG00000172482	259900	Vascular-diseases	-	CARDIOVASCULAR	#5572669;#6770732;#15580002	+
AGXT	ENSG00000172482	259900	Vision-disorders	visual-impairment;vision-loss	OPHTHALMOLOGIC	2297338;15580002	-
AGXT	ENSG00000172482	259900	Vitamin-responsive	pyridoxine;vitamin-B6	MISCELLANEOUS	3974685;15365967;15253729;12768081;11562405	-
AGXT	ENSG00000172482	259900	Vomiting	nausea	GASTROINTESTINAL	10586179;15356974	-
AGXT	ENSG00000172482	259900	Water-electrolyte-imbalance	-	METABOLIC	#10586179;#6829606;#6770732	+
ALAS2	ENSG00000158578	301300	Alpha-fetoprotein-abnormal	alpha-fetoprotein-elevated	MISCELLANEOUS	16540354	-
ALAS2	ENSG00000158578	301300	Anemia	hypochromic;sideroblastic;microcytic;anisocytosis;poikilocytosis;bizarre-echinocytes;tear-drop-poikilocytes	HEMATOLOGIC	11110715;1570328;8107717;12663458;10029606;16540354;16446107;15477213;12531813;12031592;12393718;10577279;7560104;7949148	-
ALAS2	ENSG00000158578	301300	Arrhythmia	tachycardia	CARDIOVASCULAR	1570328	-
ALAS2	ENSG00000158578	301300	Blood-platelet-disorders	-	HEMATOLOGIC	#12663458;#8107717	+
ALAS2	ENSG00000158578	301300	Bone-marrow-diseases	myelodysplasia;myelofibrosis;hypercellular;hypererythroid;dyserythropoiesis;ringed-sideroblasts;erythroid-hyperplasia;ring-sideroblasts	HEMATOLOGIC	11110715;1570328;12663458;10029606;16540354;16446107;15477213;12531813;12031592;12393718;10577279;7560104;8107717	-
ALAS2	ENSG00000158578	301300	Cardiomyopathy	cardiomegaly;cardiac-enlargement	CARDIOVASCULAR	10029606	-
ALAS2	ENSG00000158578	301300	Cardiorespiratory-arrest	died-within-first-year	CARDIOVASCULAR	7949148	-
ALAS2	ENSG00000158578	301300	Cardiovascular-diseases	-	CARDIOVASCULAR	#1570328;#10029606;#7949148	+
ALAS2	ENSG00000158578	301300	Congenital-heart-defects	interatrial-septal-defect	CARDIOVASCULAR	7949148	-
ALAS2	ENSG00000158578	301300	Digestive-system-diseases	-	GASTROINTESTINAL	#16540354;#10029606;#7949148;#8107717;#15477213;#1570328	+
ALAS2	ENSG00000158578	301300	Digestive-system-neoplasms	-	ONCOLOGIC	#16540354	+
ALAS2	ENSG00000158578	301300	Embolism-and-thrombosis	thrombosis;deep-venous-thrombosis;repeated-episodes;pulmonary-emboli	CARDIOVASCULAR	7949148	-
ALAS2	ENSG00000158578	301300	Esophageal-varices	episodes;variceal-bleeding	GASTROINTESTINAL	16540354	-
ALAS2	ENSG00000158578	301300	Exercise-intolerance	fatigue;shortness-of-breath;weakness;asthenia	MISCELLANEOUS	7560104;11110715;1570328;16446107;15477213;10577279;7949148;8107717	-
ALAS2	ENSG00000158578	301300	Fatty-liver	liver-fatty-changes	GASTROINTESTINAL	10029606	-
ALAS2	ENSG00000158578	301300	Female-genital-diseases	-	GENITOURINARY	#15477213	+
ALAS2	ENSG00000158578	301300	Gastrointestinal-diseases	-	GASTROINTESTINAL	#16540354	+
ALAS2	ENSG00000158578	301300	Genitourinary-diseases	-	GENITOURINARY	#16540354;#15477213	+
ALAS2	ENSG00000158578	301300	Heart-diseases	-	CARDIOVASCULAR	#1570328;#10029606	+
ALAS2	ENSG00000158578	301300	Hematologic-diseases	-	HEMATOLOGIC	#11110715;#1570328;#8107717;#12663458;#10029606;#16540354;#16446107;#15477213;#12531813;#12031592;#12393718;#10577279;#7560104;#7949148	+
ALAS2	ENSG00000158578	301300	Hemochromatosis	hemosiderosis;iron-deposition;liver-stainable-iron	METABOLIC	7560104;11110715;7949148;10029606;16540354;15477213	-
ALAS2	ENSG00000158578	301300	Hemoglobin-levels-abnormal	hemoglobin-deficiency	HEMATOLOGIC	11110715;12663458;10029606;16540354;16446107;15477213;12531813;12031592;12393718;10577279;7560104;7949148;8107717	-
ALAS2	ENSG00000158578	301300	Hepatocellular-carcinoma	-	ONCOLOGIC	16540354	-
ALAS2	ENSG00000158578	301300	Hepatomegaly	hepatosplenomegaly	GASTROINTESTINAL	10029606;7949148	-
ALAS2	ENSG00000158578	301300	Hyperferricemia	iron-stores-increased;serum-ferritin-elevated;iron-overload;serum-iron-increased	METABOLIC	11110715;1570328;12663458;10029606;16540354;16446107;15477213;12531813;12031592;12393718;10577279;7560104;7949148;8107717	-
ALAS2	ENSG00000158578	301300	Hyperpigmentation	skin-hyperpigmentation	DERMATOLOGIC	15477213	-
ALAS2	ENSG00000158578	301300	Infertility-male	erectile-dysfunction;impotence	GENITOURINARY	16540354	-
ALAS2	ENSG00000158578	301300	Lethargy	tiredness	NEUROLOGIC	12663458	-
ALAS2	ENSG00000158578	301300	Liver-cirrhosis	Biopsy-findings;precirrhotic-changes;liver-hemosiderin;micronodular-cirrhosis	GASTROINTESTINAL	10029606;16540354	-
ALAS2	ENSG00000158578	301300	Liver-diseases	-	GASTROINTESTINAL	#10029606;#7949148;#16540354;#8107717;#15477213	+
ALAS2	ENSG00000158578	301300	Liver-enzymes-abnormal	AST-elevated;GGT-elevated	GASTROINTESTINAL	8107717;10029606;15477213	-
ALAS2	ENSG00000158578	301300	Male-genital-diseases	-	GENITOURINARY	#16540354	+
ALAS2	ENSG00000158578	301300	Menstruation-disturbances	amenorrhea	GENITOURINARY	15477213	-
ALAS2	ENSG00000158578	301300	Metabolic-diseases	-	METABOLIC	#7560104;#11110715;#7949148;#10029606;#16540354;#15477213;#1570328;#12663458;#16446107;#12531813;#12031592;#12393718;#10577279;#8107717	+
ALAS2	ENSG00000158578	301300	Neoplasms	-	ONCOLOGIC	#16540354	+
ALAS2	ENSG00000158578	301300	Nervous-system-diseases	-	NEUROLOGIC	#12663458	+
ALAS2	ENSG00000158578	301300	Neurobehavioral-manifestations	-	NEUROLOGIC	#12663458	+
ALAS2	ENSG00000158578	301300	Neurologic-manifestations	-	NEUROLOGIC	#12663458	+
ALAS2	ENSG00000158578	301300	Paleness	pallor;pale	DERMATOLOGIC	7560104;1570328;10577279	-
ALAS2	ENSG00000158578	301300	Pigmentation-disorders	-	DERMATOLOGIC	#15477213	+
ALAS2	ENSG00000158578	301300	Respiration-disorders	dyspnea;breathlessness;chronic-obstructive-lung-disease;airways-disease	RESPIRATORY	8107717;7949148;12663458;15477213;7560104	-
ALAS2	ENSG00000158578	301300	Respiratory-tract-diseases	-	RESPIRATORY	#8107717;#7949148;#12663458;#15477213;#7560104	+
ALAS2	ENSG00000158578	301300	Skin-diseases	-	DERMATOLOGIC	#15477213;#7560104;#1570328;#10577279	+
ALAS2	ENSG00000158578	301300	Splenomegaly	hepatosplenomegaly;hypersplenism	MISCELLANEOUS	1570328;10029606;7949148;8107717	-
ALAS2	ENSG00000158578	301300	Thrombocytopenia	low-platelet-count	HEMATOLOGIC	12663458	-
ALAS2	ENSG00000158578	301300	Thrombocytosis	high-platelet-count	HEMATOLOGIC	8107717	-
ALAS2	ENSG00000158578	301300	Vascular-diseases	-	CARDIOVASCULAR	#7949148	+
ALAS2	ENSG00000158578	301300	Vitamin-responsive	pyridoxine;vitamin-B6	MISCELLANEOUS	11110715;12663458;10029606;12531813;12031592;12393718;10577279;7560104;7949148;8107717	-
ALAS2	ENSG00000158578	301300	Vomiting	nausea	GASTROINTESTINAL	1570328	-
ALDH18A1	ENSG00000059573	138250	Aminoacid-levels-abnormal	citrulline-decreased;ornithine-decreased;arginine-decreased;proline-decreased;hypoornithinemia;hypocitrullinemia;hypoargininemia;hypoprolinemia	METABOLIC	15517380;11092761	-
ALDH18A1	ENSG00000059573	138250	Behavioral-symptoms	abnormal-behaviour	PSYCHIATRIC	15517380	-
ALDH18A1	ENSG00000059573	138250	Bone-diseases	-	MUSCULOSKELETAL	#15517380	+
ALDH18A1	ENSG00000059573	138250	Brain-diseases	-	NEUROLOGIC	#15517380	+
ALDH18A1	ENSG00000059573	138250	Cataract	bilateral-zonular-cataracts;subcapsular-cataracts	OPHTHALMOLOGIC	15517380;11092761	-
ALDH18A1	ENSG00000059573	138250	Central-nervous-system-diseases	-	NEUROLOGIC	#15517380	+
ALDH18A1	ENSG00000059573	138250	Developmental-delay	-	NEUROLOGIC	15517380	-
ALDH18A1	ENSG00000059573	138250	Digestive-system-diseases	-	GASTROINTESTINAL	#15517380;#11092761	+
ALDH18A1	ENSG00000059573	138250	Dysmorphism-and-abnormalities	dysmorphic-features;short-neck;unusually-long-fingers;unusually-long-toes;abducted-thumbs	MISCELLANEOUS	15517380	-
ALDH18A1	ENSG00000059573	138250	Dystonic-disorders	dystonia-of-the-hands;dystonia-of-the-feet	NEUROLOGIC	15517380	-
ALDH18A1	ENSG00000059573	138250	Eye-diseases	-	OPHTHALMOLOGIC	#15517380;#11092761	+
ALDH18A1	ENSG00000059573	138250	Failure-to-thrive	-	MISCELLANEOUS	15517380;11092761	-
ALDH18A1	ENSG00000059573	138250	Foot-deformities	pes-planus;due-to-joint-laxity	MUSCULOSKELETAL	15517380	-
ALDH18A1	ENSG00000059573	138250	Gait-disorders	complete-loss-of-the-ability-to-walk	NEUROLOGIC	15517380;11092761	-
ALDH18A1	ENSG00000059573	138250	Growth-deficiency	short-stature	MISCELLANEOUS	15517380	-
ALDH18A1	ENSG00000059573	138250	Growth-disorders	-	MISCELLANEOUS	#15517380;#11092761	+
ALDH18A1	ENSG00000059573	138250	Hyperammonemia	mild;hyperammonaemia	METABOLIC	15517380;11092761	-
ALDH18A1	ENSG00000059573	138250	Hyperreflexia	deep-tendon-reflexes-abnormal;brisk-reflexes	NEUROLOGIC	15517380	-
ALDH18A1	ENSG00000059573	138250	Immune-system-diseases	-	IMMUNOLOGIC	#15517380	+
ALDH18A1	ENSG00000059573	138250	Infections	urinary-tract-infections;related-to-vesico-urethral-reflux	IMMUNOLOGIC	15517380	-
ALDH18A1	ENSG00000059573	138250	Joint-diseases	-	MUSCULOSKELETAL	#15517380;#11092761	+
ALDH18A1	ENSG00000059573	138250	Joint-instability	joint-laxity;lax-joints;dislocated-hips;coxa-valga	MUSCULOSKELETAL	15517380;11092761	-
ALDH18A1	ENSG00000059573	138250	Lens-diseases	-	OPHTHALMOLOGIC	#15517380;#11092761	+
ALDH18A1	ENSG00000059573	138250	Mental-retardation	mentally-retarded	NEUROLOGIC	15517380;11092761	-
ALDH18A1	ENSG00000059573	138250	Metabolic-bone-diseases	osteopenic-bones;osteopenic;osteopenia	MUSCULOSKELETAL	15517380	-
ALDH18A1	ENSG00000059573	138250	Metabolic-diseases	-	METABOLIC	#15517380;#11092761	+
ALDH18A1	ENSG00000059573	138250	Movement-disorders	-	NEUROLOGIC	#15517380	+
ALDH18A1	ENSG00000059573	138250	Muscle-hypotonia	severe-hypotonia	NEUROLOGIC	15517380;11092761	-
ALDH18A1	ENSG00000059573	138250	Muscular-atrophy	muscular-wasting;muscular-wasting-of-the-limbs;distal-muscular-wasting	NEUROLOGIC	15517380	-
ALDH18A1	ENSG00000059573	138250	Musculoskeletal-diseases	-	MUSCULOSKELETAL	#15517380;#11092761	+
ALDH18A1	ENSG00000059573	138250	Nervous-system-diseases	-	NEUROLOGIC	#15517380;#11092761	+
ALDH18A1	ENSG00000059573	138250	Neurobehavioral-manifestations	-	NEUROLOGIC	#15517380;#11092761	+
ALDH18A1	ENSG00000059573	138250	Neurodegenerative-diseases	progressive-neurodegeneration;progressive-neurological-dysfunction	NEUROLOGIC	15517380;11092761	-
ALDH18A1	ENSG00000059573	138250	Neurologic-manifestations	-	NEUROLOGIC	#15517380;#11092761	+
ALDH18A1	ENSG00000059573	138250	Neuromuscular-manifestations	-	NEUROLOGIC	#15517380;#11092761	+
ALDH18A1	ENSG00000059573	138250	Neuronal-loss-and-lesions	MRI-findings;signal-intensity-abnormalities;white-matter-abnormal;white-matter-atrophy	NEUROLOGIC	15517380	-
ALDH18A1	ENSG00000059573	138250	Optic-nerve-diseases	alteration-of-the-optical-nerves;Visual-evoked-potentials-abnormal	OPHTHALMOLOGIC	15517380	-
ALDH18A1	ENSG00000059573	138250	Peripheral-nervous-system-diseases	-	NEUROLOGIC	#15517380	+
ALDH18A1	ENSG00000059573	138250	Polyneuropathies	peripheral-neuropathy;predominantly-axonal-neuropathy;axonal-neuropathy;progressively-decreasing-motor-nerve-conduction;NCV-abnormal	NEUROLOGIC	15517380	-
ALDH18A1	ENSG00000059573	138250	Psychiatric-disorders	-	PSYCHIATRIC	#15517380	+
ALDH18A1	ENSG00000059573	138250	Pyramidal-tract-signs	pyramidal-syndrome	NEUROLOGIC	15517380	-
ALDH18A1	ENSG00000059573	138250	Reflexes-abnormal	-	NEUROLOGIC	#15517380	+
ALDH18A1	ENSG00000059573	138250	Seizures	tonic-clonic-seizures	NEUROLOGIC	15517380	-
ALDH18A1	ENSG00000059573	138250	Skin-diseases	hyperelasticity-of-the-skin;hyperelasticity;smooth-skin;hyperelastic-skin;connective-tissue-disease	DERMATOLOGIC	15517380;11092761	-
ALDH18A1	ENSG00000059573	138250	Tremor	large-amplitude-tremor	NEUROLOGIC	15517380	-
ALDH18A1	ENSG00000059573	138250	Vomiting	vomiting-due-to-gastroesophageal-reflux	GASTROINTESTINAL	15517380;11092761	-
ALDH2	ENSG00000111275	100650	Blood-circulation-disorder	pronounced-cardiovascular-hemodynamic-effects;hemodynamic-abnormal	CARDIOVASCULAR	10780266	-
ALDH2	ENSG00000111275	100650	Cardiovascular-diseases	-	CARDIOVASCULAR	#10780266	+
ALDH2	ENSG00000111275	100650	Cutaneous-flushing	after-alcohol-intake;intoxication-features;alcohol-hypersensitivity	MISCELLANEOUS	10780266	-
ALDH2	ENSG00000111275	100650	Mental-disorders	-	PSYCHIATRIC	#10780266;#15654505	+
ALDH2	ENSG00000111275	100650	Psychiatric-disorders	-	PSYCHIATRIC	#10780266;#15654505	+
ALDH2	ENSG00000111275	100650	Substance-related-disorders	alcohol-intolerance;discomfort-following-alcohol-ingestion;susceptibility-for-alcohol-use;susceptibility-for-tobacco-use	PSYCHIATRIC	10780266;15654505	-
ALDH2	ENSG00000111275	150699	Connective-and-soft-tissue-neoplasms	-	ONCOLOGIC	#8521389	+
ALDH2	ENSG00000111275	150699	Leiomyoma	primary-uterine-leiomyoma;benign;fusion-partners-of-HMGIC	ONCOLOGIC	8521389	-
ALDH2	ENSG00000111275	150699	Muscle-tissue-neoplasm	-	ONCOLOGIC	#8521389	+
ALDH2	ENSG00000111275	150699	Neoplasms	-	ONCOLOGIC	#8521389	+
ALDH2	ENSG00000111275	166710	Bone-diseases	-	MUSCULOSKELETAL	#16520888	+
ALDH2	ENSG00000111275	166710	Metabolic-bone-diseases	bone-mineral-density-reduced	MUSCULOSKELETAL	16520888	-
ALDH2	ENSG00000111275	166710	Musculoskeletal-diseases	-	MUSCULOSKELETAL	#16520888	+
ALDH2	ENSG00000111275	166710	Osteoporosis	progressive-decline-in-bone-mass;decreased-bone-mass	MUSCULOSKELETAL	16520888	-
ALDH2	ENSG00000111275	166710	Pathological-fractures	increased-risk-of-bone-fracture;elderly-persons;vertebral-fractures;hip-fractures	MUSCULOSKELETAL	16520888	-
ALDH4A1	ENSG00000159423	239510	Aminoacid-levels-abnormal	elevated-proline;elevated-hydroxyproline;elevated-glycine;elevated-ornithine;hyperglycinemia;hyperprolinemia	METABOLIC	9700195;15214748;4825691;2624476;837521;956388	-
ALDH4A1	ENSG00000159423	239510	Aminoaciduria	glycinuria;prolinuria;hydroxyprolinuria	METABOLIC	9700195	-
ALDH4A1	ENSG00000159423	239510	Behavioral-symptoms	behavior-problems;transient-behavior-problems	PSYCHIATRIC	956388	-
ALDH4A1	ENSG00000159423	239510	Body-temperature-changes	-	MISCELLANEOUS	#956388;#4825691	+
ALDH4A1	ENSG00000159423	239510	Brain-diseases	-	NEUROLOGIC	#2383933;#4825691;#9700195;#956388;#15214748;#2624476	+
ALDH4A1	ENSG00000159423	239510	Central-nervous-system-diseases	-	NEUROLOGIC	#2383933;#4825691;#9700195;#956388;#15214748;#2624476	+
ALDH4A1	ENSG00000159423	239510	Developmental-delay	growth-delay;mild	NEUROLOGIC	2383933;4825691	-
ALDH4A1	ENSG00000159423	239510	Electroencephalogram-abnormal	rhythmic-activity-reduced;generalized-discharges;epileptic-features	NEUROLOGIC	2383933;4825691	-
ALDH4A1	ENSG00000159423	239510	Fever	high-fever	MISCELLANEOUS	956388;4825691	-
ALDH4A1	ENSG00000159423	239510	Hearing-disorders	Audiogram-findings;15-decibel-hearing-loss;bilateral	NEUROLOGIC	4825691	-
ALDH4A1	ENSG00000159423	239510	Immune-system-diseases	-	IMMUNOLOGIC	#4825691	+
ALDH4A1	ENSG00000159423	239510	Infections	recurrent-infections;respiratory-tract-infections	IMMUNOLOGIC	4825691	-
ALDH4A1	ENSG00000159423	239510	Metabolic-diseases	-	METABOLIC	#9700195;#15214748;#4825691;#2624476;#837521;#956388;#2383933	+
ALDH4A1	ENSG00000159423	239510	Nervous-system-diseases	-	NEUROLOGIC	#2383933;#4825691;#9700195;#956388;#15214748;#2624476	+
ALDH4A1	ENSG00000159423	239510	Neurologic-manifestations	-	NEUROLOGIC	#4825691	+
ALDH4A1	ENSG00000159423	239510	Organic-acids-abnormal	elevated-pyrroline-5-carboxylate;pyrrole-2-carboxylic-aciduria;hydroxyprolinuria;prolinuria	METABOLIC	15214748;837521;4825691;2383933	-
ALDH4A1	ENSG00000159423	239510	Psychiatric-disorders	-	PSYCHIATRIC	#956388	+
ALDH4A1	ENSG00000159423	239510	Seizures	recurrent-seizures;febrile-seizures;convulsions;febrile-convulsions;childhood-seizures	NEUROLOGIC	9700195;956388;15214748;4825691;2624476;2383933	-
ALDH5A1	ENSG00000112294	271980	Aggression	aggressiveness;aggressive-behavior;aggressive-episodes	PSYCHIATRIC	12743223;14512218	-
ALDH5A1	ENSG00000112294	271980	Aminoacid-levels-abnormal	hyperglycinemia	METABOLIC	12743223	-
ALDH5A1	ENSG00000112294	271980	Aminoaciduria	glycinuria	METABOLIC	12743223	-
ALDH5A1	ENSG00000112294	271980	Anxiety-disorders	episodes;afraid;fearful;increased-anxiety;severe-anxiety-and-mutism;disabling-anxiety;anxiety	PSYCHIATRIC	15287248;15037717;12743223;14512218	-
ALDH5A1	ENSG00000112294	271980	Ataxia	severe;dysmetria;appendicular-ataxia;non-progressive-ataxia;ataxic	NEUROLOGIC	9093300;12743223;9683595;10234622	-
ALDH5A1	ENSG00000112294	271980	Athetosis	choreoathetosis	NEUROLOGIC	7726383	-
ALDH5A1	ENSG00000112294	271980	Autistic-disorder	autism;mild-autism;pervasive-developmental-disorder-(PDD);autistic-features	PSYCHIATRIC	9683595;12743223;9266358;10234622	-
ALDH5A1	ENSG00000112294	271980	Behavioral-symptoms	behavioural-problems;behavior-abnormal;behavioral-abnormalities;unsusual-behavior;uncooperative;episodes;excitable-behavior;behavioral-difficulties;tantrums	PSYCHIATRIC	9683595;9093300;12743223;15287248;10234622;14512218	-
ALDH5A1	ENSG00000112294	271980	Body-temperature-changes	-	MISCELLANEOUS	#9093300	+
ALDH5A1	ENSG00000112294	271980	Brain-diseases	-	NEUROLOGIC	#9093300;#12743223;#15287248;#15059623;#14512218;#9266358	+
ALDH5A1	ENSG00000112294	271980	Cardiomyopathy	hypertrophic;left-ventricle	CARDIOVASCULAR	9093300	-
ALDH5A1	ENSG00000112294	271980	Cardiovascular-diseases	-	CARDIOVASCULAR	#9093300	+
ALDH5A1	ENSG00000112294	271980	Carnitine-levels-abnormal	-	METABOLIC	9093300	-
ALDH5A1	ENSG00000112294	271980	Central-nervous-system-diseases	-	NEUROLOGIC	#14512218;#7726383;#9093300;#12743223;#15287248;#15059623;#8803774;#9266358	+
ALDH5A1	ENSG00000112294	271980	Cerebellar-atrophy	decreased-cerebellar-size;cerebellar-hypometabolism;cerebellar-atrophy;vermian-atrophy;cerebellar-vermis-atrophy;retrocerebellar-cysts;cerebellar-hypoplasia;MRI-findings	NEUROLOGIC	9093300;12743223;15287248;15059623;14512218	-
ALDH5A1	ENSG00000112294	271980	Cerebral-atrophy	-	NEUROLOGIC	12743223	-
ALDH5A1	ENSG00000112294	271980	Choreatic-disorders	choreoathetosis;choreiform-movements;involuntary-movements	NEUROLOGIC	9093300;7726383	-
ALDH5A1	ENSG00000112294	271980	Confusion	disorientation;episodes;spatial-disorientation;temporal-disorientation	NEUROLOGIC	14512218	-
ALDH5A1	ENSG00000112294	271980	Consciousness-disorders	sudden-unconsciousness;narcolepsy-like	NEUROLOGIC	15287248	-
ALDH5A1	ENSG00000112294	271980	Craniofacial-abnormalities	-	MUSCULOSKELETAL	#9093300	+
ALDH5A1	ENSG00000112294	271980	Dehydration	-	METABOLIC	9093300	-
ALDH5A1	ENSG00000112294	271980	Developmental-delay	mild;severe;psychomotor-retardation;coordination;language-delay;speech-disturbance;speech-delay;motor-delay;coordination-impaired	NEUROLOGIC	9093300;12743223;15287248;15059623;15037717;11901270;8803774;9683595;9266358;10234622;14512218	-
ALDH5A1	ENSG00000112294	271980	Diarrhea	chronic	GASTROINTESTINAL	9093300	-
ALDH5A1	ENSG00000112294	271980	Digestive-system-diseases	-	GASTROINTESTINAL	#9093300;#12743223	+
ALDH5A1	ENSG00000112294	271980	Dysmorphism-and-abnormalities	hypertelorism;epicanthal-folds;face-abnormalities	MISCELLANEOUS	9093300	-
ALDH5A1	ENSG00000112294	271980	Dystonic-disorders	dystonia	NEUROLOGIC	7726383	-
ALDH5A1	ENSG00000112294	271980	Electroencephalogram-abnormal	diffusely;slow;multifocal;sharp-and-slow-waves;epileptiform;paroxysmal-abnormalities;focal-activities-in-temporo-occipital-region;spike-wave-discharges;spindle-asymmetry;spike-discharges;focal-spikes	NEUROLOGIC	9093300;12743223;15287248;14512218	-
ALDH5A1	ENSG00000112294	271980	Encephalopathy	slowly-progressive;static-encephalopathy	NEUROLOGIC	12743223;15059623	-
ALDH5A1	ENSG00000112294	271980	Endocrine-system-diseases	-	ENDOCRINOLOGIC	#9266358	+
ALDH5A1	ENSG00000112294	271980	Eye-diseases	-	OPHTHALMOLOGIC	#7726383;#9093300;#9266358;#10234622	+
ALDH5A1	ENSG00000112294	271980	Feeding-difficulties	-	GASTROINTESTINAL	9093300	-
ALDH5A1	ENSG00000112294	271980	Fever	-	MISCELLANEOUS	9093300	-
ALDH5A1	ENSG00000112294	271980	GABA-levels-abnormal	GABA-levels-increased;gamma-aminobutyric-acid-elevated;4-aminobutyric-acid-elevated;serum;CSF	MISCELLANEOUS	11901270;10234622;14512218	-
ALDH5A1	ENSG00000112294	271980	Gait-disorders	unsteady-gait;falling;broad-based-gait;balance-problems	NEUROLOGIC	9093300;15287248	-
ALDH5A1	ENSG00000112294	271980	Gastrointestinal-diseases	gastrointestinal-symptoms	GASTROINTESTINAL	12743223	-
ALDH5A1	ENSG00000112294	271980	Gonadal-disorders	-	ENDOCRINOLOGIC	#9266358	+
ALDH5A1	ENSG00000112294	271980	Hallucinations	auditory-hallucinations;visual-hallucinations;hypnagogic-hallucinations;hallucinatory-episodes	NEUROLOGIC	15287248;9093300;12743223;14512218	-
ALDH5A1	ENSG00000112294	271980	Heart-diseases	-	CARDIOVASCULAR	#9093300	+
ALDH5A1	ENSG00000112294	271980	Hepatomegaly	mild	GASTROINTESTINAL	9093300	-
ALDH5A1	ENSG00000112294	271980	Hydroxypropionic-aciduria	3-hydroxypropionic-acids-elevated	METABOLIC	9093300;7726383	-
ALDH5A1	ENSG00000112294	271980	Hyporeflexia	decreased;areflexia;deep-tendon-reflexes-absent	NEUROLOGIC	9093300;12743223;15059623;9683595;9266358	-
ALDH5A1	ENSG00000112294	271980	Immune-system-diseases	-	IMMUNOLOGIC	#9093300	+
ALDH5A1	ENSG00000112294	271980	Infections	recurrent;respiratory-tract-infections	IMMUNOLOGIC	9093300	-
ALDH5A1	ENSG00000112294	271980	Joint-diseases	-	MUSCULOSKELETAL	#9093300	+
ALDH5A1	ENSG00000112294	271980	Joint-instability	joint-hypermobility;laxity;laxity-of-ligaments	MUSCULOSKELETAL	9093300	-
ALDH5A1	ENSG00000112294	271980	Lethargy	flaccidity;lethargic;drowsiness;apathetic	NEUROLOGIC	9093300;15287248;9266358	-
ALDH5A1	ENSG00000112294	271980	Liver-diseases	-	GASTROINTESTINAL	#9093300	+
ALDH5A1	ENSG00000112294	271980	Lung-diseases	-	RESPIRATORY	#9093300	+
ALDH5A1	ENSG00000112294	271980	Macrocephaly	-	MUSCULOSKELETAL	9093300	-
ALDH5A1	ENSG00000112294	271980	Mental-disorders	-	PSYCHIATRIC	#15287248;#15037717;#12743223;#14512218;#9683595;#9266358;#10234622;#9093300	+
ALDH5A1	ENSG00000112294	271980	Mental-retardation	mild;severe;variable-degrees-of-mental-retardation	NEUROLOGIC	9093300;9683595;12743223;14512218	-
ALDH5A1	ENSG00000112294	271980	Metabolic-brain-diseases	MRS-findings;magnetic-resonance-spectroscopy;GABA-levels-abnormal;GHB-levels-abnormal;GABA-accumulation;white-matter-abnormal;gray-matter-abnormal;cerebellar-hypometabolism	METABOLIC	15037717;12743223	-
ALDH5A1	ENSG00000112294	271980	Metabolic-diseases	-	METABOLIC	#12743223;#9093300;#7726383;#9683595;#9266358;#15287248;#15059623;#15037717;#11901270;#8803774;#10234622;#14512218	+
ALDH5A1	ENSG00000112294	271980	Microcephaly	-	MUSCULOSKELETAL	9093300	-
ALDH5A1	ENSG00000112294	271980	Movement-disorders	stereotypical-motor-movements;catatonic-posturing;hyperkinetic-movement-disorder	NEUROLOGIC	14512218;#7726383;#9093300	-
ALDH5A1	ENSG00000112294	271980	Muscle-hypotonia	no-weakness;nonparalytic-hypotonia;hypotonic	NEUROLOGIC	9093300;12743223;15287248;15059623;11901270;9683595;9266358;10234622	-
ALDH5A1	ENSG00000112294	271980	Muscular-atrophy	type-2-fiber-atrophy;nonspecific	NEUROLOGIC	9093300	-
ALDH5A1	ENSG00000112294	271980	Musculoskeletal-diseases	-	MUSCULOSKELETAL	#9093300	+
ALDH5A1	ENSG00000112294	271980	Nervous-system-diseases	-	NEUROLOGIC	#9093300;#12743223;#9683595;#10234622;#14512218;#7726383;#15287248;#15059623;#15037717;#11901270;#8803774;#9266358	+
ALDH5A1	ENSG00000112294	271980	Neurobehavioral-manifestations	-	NEUROLOGIC	#14512218;#15287248;#9093300;#12743223;#9266358;#9683595;#11901270;#8803774;#10234622;#15037717	+
ALDH5A1	ENSG00000112294	271980	Neurologic-manifestations	-	NEUROLOGIC	#9093300;#12743223;#9683595;#10234622;#14512218;#15287248;#15059623;#9266358;#11901270;#8803774;#15037717	+
ALDH5A1	ENSG00000112294	271980	Neuromuscular-manifestations	-	NEUROLOGIC	#9093300;#12743223;#15287248;#15059623;#11901270;#9683595;#9266358;#10234622	+
ALDH5A1	ENSG00000112294	271980	Neuronal-loss-and-lesions	MRI-findings;signal-intensity-abnormalities;white-matter-abnormal;subcortical-abnormalities;demyelination;globus-pallidus-abnormal;bilateral-symmetric;dentate-nuclei-abnormal	NEUROLOGIC	9093300;12743223;8803774;14512218	-
ALDH5A1	ENSG00000112294	271980	Obsessive-compulsive-disorder	OCD	PSYCHIATRIC	12743223	-
ALDH5A1	ENSG00000112294	271980	Ocular-motility-disorders	-	OPHTHALMOLOGIC	#9093300;#9266358;#10234622	+
ALDH5A1	ENSG00000112294	271980	Optic-nerve-diseases	optic-atrophy	OPHTHALMOLOGIC	7726383	-
ALDH5A1	ENSG00000112294	271980	Organic-acids-abnormal	4-hydroxybutyric-aciduria;3-hydroxypropionic-aciduria;3,4-dihydroxybutyric-aciduria;glycolicaciduria;4,5-dihydroxyhexanoic-aciduria;gamma-hydroxybutyric-aciduria	METABOLIC	9093300;7726383;9683595;12743223;9266358;15287248;15059623;15037717;11901270;8803774;10234622;14512218	-
ALDH5A1	ENSG00000112294	271980	Paleness	pale	DERMATOLOGIC	9093300	-
ALDH5A1	ENSG00000112294	271980	Pathologic-nystagmus	optokinetic-nystagmus;horizontal-nystagmus	OPHTHALMOLOGIC	9093300;9266358	-
ALDH5A1	ENSG00000112294	271980	Perceptual-disorders	verbal-agnosia;disorders-in-perceptual-analysis;comprehension-deficit;hallucinations;auditory-hallucinations;visual-hallucinations;comprehension	NEUROLOGIC	15287248;#9093300;#12743223;#14512218	-
ALDH5A1	ENSG00000112294	271980	Pneumonia	febrile-pneumonia	RESPIRATORY	9093300	-
ALDH5A1	ENSG00000112294	271980	Psychiatric-disorders	-	PSYCHIATRIC	#9683595;#9093300;#12743223;#15287248;#10234622;#14512218;#15037717;#9266358	+
ALDH5A1	ENSG00000112294	271980	Psychomotor-agitation	hyperkinesis;concentration-deficit;restless;attention-span-limited;attention-deficit;inattention;hyperactivity;hyperactive;hyperkinetic;agitated;agitation	NEUROLOGIC	9093300;12743223;11901270;8803774;9266358;10234622;14512218	-
ALDH5A1	ENSG00000112294	271980	Psychotic-disorders	psychosis;psychoses;psychotic;hallucinations;haloperidol-responsive;psychotic-episodes;stereotypical-psychotic-aspects	PSYCHIATRIC	9093300;12743223;15287248;9266358;14512218	-
ALDH5A1	ENSG00000112294	271980	Reflexes-abnormal	-	NEUROLOGIC	#9093300;#12743223;#15059623;#9683595;#9266358	+
ALDH5A1	ENSG00000112294	271980	Respiration-disorders	respiratory-distress;recurrent	RESPIRATORY	9093300	-
ALDH5A1	ENSG00000112294	271980	Respiratory-tract-diseases	-	RESPIRATORY	#9093300	+
ALDH5A1	ENSG00000112294	271980	Retinal-diseases	retinitis-pigmentosa	OPHTHALMOLOGIC	7726383	-
ALDH5A1	ENSG00000112294	271980	Schizophrenia-and-psychotic-disorders	-	PSYCHIATRIC	#9093300;#12743223;#15287248;#9266358;#14512218	+
ALDH5A1	ENSG00000112294	271980	Seizures	grand-mal-epilepsy;epilepsy;spasms;myoclonic;tonic-clonic-seizures;status-epilepticus	NEUROLOGIC	9093300;12743223;15287248;9266358;14512218	-
ALDH5A1	ENSG00000112294	271980	Self-injurious-behavior	skin-picking;hyperactivity-and-self-injurious-behavior	PSYCHIATRIC	9093300;12743223	-
ALDH5A1	ENSG00000112294	271980	Sex-differentiation-disorders	underdeveloped-genitalia;secondary-sexual-characteristics-absent	ENDOCRINOLOGIC	9266358	-
ALDH5A1	ENSG00000112294	271980	Skin-diseases	-	DERMATOLOGIC	#9093300	+
ALDH5A1	ENSG00000112294	271980	Sleep-bruxism	teeth-grinding	NEUROLOGIC	15287248;8803774;9093300	-
ALDH5A1	ENSG00000112294	271980	Sleep-disorders	sleep-disturbance;inversion-of-nyctohemeral-rhythm;daytime-sleepiness;narcolepsy-like-symptoms;narcolepsy	NEUROLOGIC	12743223;15287248;8803774;9093300;14512218	-
ALDH5A1	ENSG00000112294	271980	Speech-disorders	inability-to-produce-intelligible-words;speech-delay;language-disorder;mutism;incomprehensible-language	NEUROLOGIC	15287248;15037717;11901270;8803774;9683595;9093300;12743223;14512218	-
ALDH5A1	ENSG00000112294	271980	Strabismus	alternating-strabismus;squint;convergent-squint	OPHTHALMOLOGIC	9093300;10234622	-
ALDH5A1	ENSG00000112294	271980	Telangiectasis	vascular-telangiectasia;vascular-telangiectasia-of-bulbar-conjunctiva	CARDIOVASCULAR	9093300	-
ALDH5A1	ENSG00000112294	271980	Vascular-diseases	-	CARDIOVASCULAR	#9093300	+
ALDH5A1	ENSG00000112294	271980	Vision-disorders	poor-sight	OPHTHALMOLOGIC	9266358	-
ALDH5A1	ENSG00000112294	271980	Vomiting	emesis	GASTROINTESTINAL	9093300	-
ALDH5A1	ENSG00000112294	271980	Water-electrolyte-imbalance	-	METABOLIC	#9093300	+
ALDH6A1	ENSG00000119711	603178	Acid-base-imbalance	-	METABOLIC	#7609453	+
ALDH6A1	ENSG00000119711	603178	Acidosis	metabolic-acidosis;lactic-acidosis	METABOLIC	7609453	-
ALDH6A1	ENSG00000119711	603178	Aminoaciduria	alanine-elevated;beta-alanine-elevated;hypermethioninaemia	METABOLIC	10947204;3939535	-
ALDH6A1	ENSG00000119711	603178	Developmental-delay	psychomotor-retardation;psychomotor-delay	NEUROLOGIC	9787093	-
ALDH6A1	ENSG00000119711	603178	Hydroxypropionic-aciduria	3-hydroxypropionic-acids-elevated	METABOLIC	10947204;3939535;7609453	-
ALDH6A1	ENSG00000119711	603178	Metabolic-diseases	-	METABOLIC	#7609453;#10947204;#3939535;#9787093	+
ALDH6A1	ENSG00000119711	603178	Methylmalonic-aciduria	methylmalonate-elevated;methylmalonic-acid-elevated	METABOLIC	9787093;3939535;7609453	-
ALDH6A1	ENSG00000119711	603178	Nervous-system-diseases	-	NEUROLOGIC	#9787093	+
ALDH6A1	ENSG00000119711	603178	Organic-acids-abnormal	methylmalonic-aciduria;3-hydroxypropionic-aciduria;3-aminoisobutyric-aciduria;3-hydroxyisobutyric-aciduria	METABOLIC	9787093;10947204;7609453;#3939535	-
AMACR	ENSG00000082196	176807	Neoplasms	-	ONCOLOGIC	#11956072;#15330799	+
AMACR	ENSG00000082196	176807	Prostatic-neoplasms	biomarker;prostate-cancer;prostate-carcinogenesis	ONCOLOGIC	11956072;15330799	-
AMACR	ENSG00000082196	176807	Urogenital-neoplasms	-	ONCOLOGIC	#11956072;#15330799	+
AMACR	ENSG00000082196	604489	Asthma	-	RESPIRATORY	15249642	-
AMACR	ENSG00000082196	604489	Axonal-degeneration	lower-extremities;upper-extremities	NEUROLOGIC	10655068	-
AMACR	ENSG00000082196	604489	Brain-diseases	-	NEUROLOGIC	#11861706;#15249642;#10655068	+
AMACR	ENSG00000082196	604489	Bronchial-diseases	-	RESPIRATORY	#15249642	+
AMACR	ENSG00000082196	604489	Cataract	early-cataract;subcapsular-lens-opacities	OPHTHALMOLOGIC	15249642;11861706	-
AMACR	ENSG00000082196	604489	Central-nervous-system-diseases	-	NEUROLOGIC	#11861706;#15249642;#10655068	+
AMACR	ENSG00000082196	604489	Cerebral-atrophy	MRI-findings	NEUROLOGIC	11861706	-
AMACR	ENSG00000082196	604489	Consciousness-disorders	confused;agitated;conscious-level-decreased;coma	NEUROLOGIC	15249642;11861706	-
AMACR	ENSG00000082196	604489	Depressive-disorder	severe-depression;episodes	PSYCHIATRIC	15249642;11861706	-
AMACR	ENSG00000082196	604489	Developmental-delay	-	NEUROLOGIC	10655068	-
AMACR	ENSG00000082196	604489	Digestive-system-diseases	-	GASTROINTESTINAL	#15249642;#11861706	+
AMACR	ENSG00000082196	604489	Dysarthria	cerebellar-dysarthria	NEUROLOGIC	15249642	-
AMACR	ENSG00000082196	604489	Dysmorphism-and-abnormalities	micrognathia;high-arched-palate	MISCELLANEOUS	11861706	-
AMACR	ENSG00000082196	604489	Electroencephalogram-abnormal	excess-slow-activity;superimposed-sharp-frontoparietal-delta-activity;bihemispheric-epileptiform-discharges;generalised-slowing;loss-of-alpha-activity	NEUROLOGIC	15249642;11861706	-
AMACR	ENSG00000082196	604489	Electroretinography-abnormal	marked-reduction;bilateral;N95-components-reduced	OPHTHALMOLOGIC	15249642	-
AMACR	ENSG00000082196	604489	Encephalopathy	metabolic-encephalopathy	NEUROLOGIC	15249642;11861706	-
AMACR	ENSG00000082196	604489	Endocrine-system-diseases	-	ENDOCRINOLOGIC	#11861706;#10655068	+
AMACR	ENSG00000082196	604489	Exercise-intolerance	was-found-to-tire-easily;heaviness-of-legs-during-exercise	MISCELLANEOUS	10655068	-
AMACR	ENSG00000082196	604489	Eye-diseases	-	OPHTHALMOLOGIC	#15249642;#11861706;#10655068	+
AMACR	ENSG00000082196	604489	Fatty-acids-abnormal	elevated-pristanic-acid;elevated-dihydroxycholestanoic-acid;elevated-trihydroxycholestanoic-acid	METABOLIC	10655068;15249642;11861706	-
AMACR	ENSG00000082196	604489	Gonadal-disorders	-	ENDOCRINOLOGIC	#11861706;#10655068	+
AMACR	ENSG00000082196	604489	Gynecomastia	male-patient-with-gynaecomastia	DERMATOLOGIC	11861706	-
AMACR	ENSG00000082196	604489	Hair-diseases	-	DERMATOLOGIC	#11861706	+
AMACR	ENSG00000082196	604489	Headache-disorders	migraine;headache;encephalitic-like-illness	NEUROLOGIC	15249642;11861706	-
AMACR	ENSG00000082196	604489	Hematologic-diseases	-	HEMATOLOGIC	#11861706	+
AMACR	ENSG00000082196	604489	Hyperreflexia	-	NEUROLOGIC	15249642	-
AMACR	ENSG00000082196	604489	Hypoandrogenism	testosteron-decreased;estradiol-decreased;FSH-elevated;LH-elevated;primary-gonadal-failure	ENDOCRINOLOGIC	11861706	-
AMACR	ENSG00000082196	604489	Hypogonadism	primary;genital-defects;testes-atrophy	ENDOCRINOLOGIC	10655068;11861706	-
AMACR	ENSG00000082196	604489	Hypothyroidism	-	ENDOCRINOLOGIC	10655068	-
AMACR	ENSG00000082196	604489	Hypotrichosis	sparse-body-hair	DERMATOLOGIC	11861706	-
AMACR	ENSG00000082196	604489	Lens-diseases	-	OPHTHALMOLOGIC	#15249642;#11861706	+
AMACR	ENSG00000082196	604489	Leukocyte-disorders	-	HEMATOLOGIC	#11861706	+
AMACR	ENSG00000082196	604489	Leukocytosis	neutrophil-leucocytosis	HEMATOLOGIC	11861706	-
AMACR	ENSG00000082196	604489	Leukoencephalopathy	MRI-findings;white-matter-abnormal;deep-white-matter-changes	NEUROLOGIC	15249642	-
AMACR	ENSG00000082196	604489	Mental-disorders	-	PSYCHIATRIC	#15249642;#11861706	+
AMACR	ENSG00000082196	604489	Metabolic-diseases	-	METABOLIC	#10655068;#15249642;#11861706	+
AMACR	ENSG00000082196	604489	Mood-disorders	-	PSYCHIATRIC	#15249642;#11861706	+
AMACR	ENSG00000082196	604489	Movement-disorders	-	NEUROLOGIC	#15249642	+
AMACR	ENSG00000082196	604489	Muscle-spasticity	spastic-paraparesis	NEUROLOGIC	10655068	-
AMACR	ENSG00000082196	604489	Nervous-system-diseases	-	NEUROLOGIC	#10655068;#11861706;#15249642	+
AMACR	ENSG00000082196	604489	Neurobehavioral-manifestations	-	NEUROLOGIC	#15249642;#11861706	+
AMACR	ENSG00000082196	604489	Neurologic-manifestations	-	NEUROLOGIC	#15249642;#11861706;#10655068	+
AMACR	ENSG00000082196	604489	Neuromuscular-manifestations	-	NEUROLOGIC	#10655068	+
AMACR	ENSG00000082196	604489	Neuronal-loss-and-lesions	MRI-findings;signal-intensity-abnormalities;pons-abnormal;basal-ganglia-abnormal;thalamus-abnormal;cerebral-peduncles-abnormal;white-matter-abnormal;deep-white-matter-changes	NEUROLOGIC	15249642	-
AMACR	ENSG00000082196	604489	Night-blindness	nocturnal-visual-difficulties	OPHTHALMOLOGIC	15249642	-
AMACR	ENSG00000082196	604489	Optic-nerve-diseases	optic-atrophy;optic-disk-atrophy	OPHTHALMOLOGIC	15249642;11861706	-
AMACR	ENSG00000082196	604489	Papilledema	papilloedema;bilateral-papilloedema	OPHTHALMOLOGIC	11861706	-
AMACR	ENSG00000082196	604489	Paralysis-Paresis	spastic-paraparesis	NEUROLOGIC	10655068	-
AMACR	ENSG00000082196	604489	Peripheral-nervous-system-diseases	-	NEUROLOGIC	#10655068;#11861706	+
AMACR	ENSG00000082196	604489	Photophobia	-	OPHTHALMOLOGIC	11861706	-
AMACR	ENSG00000082196	604489	Polyneuropathies	sensorimotor;axonal-neuropathy;polyneuropathy;demyelinating-sensory-motor-polyneuropathy;pin-prick-impaired;temperature-sensitivity-impaired;peripheral-neuropathy	NEUROLOGIC	10655068;11861706	-
AMACR	ENSG00000082196	604489	Psychiatric-disorders	-	PSYCHIATRIC	#15249642;#11861706	+
AMACR	ENSG00000082196	604489	Reflexes-abnormal	-	NEUROLOGIC	#15249642	+
AMACR	ENSG00000082196	604489	Respiratory-tract-diseases	-	RESPIRATORY	#15249642	+
AMACR	ENSG00000082196	604489	Retinal-diseases	retinitis-pigmentosa;pigmentary-retinal-changes;retinopathy	OPHTHALMOLOGIC	10655068;15249642;11861706	-
AMACR	ENSG00000082196	604489	Seizures	epilepsy;epileptic-seizures;focal-seizures;jerks;status-epilepticus	NEUROLOGIC	10655068;15249642;11861706	-
AMACR	ENSG00000082196	604489	Sex-differentiation-disorders	feminine-habitus;sparse-body-hair	ENDOCRINOLOGIC	11861706	-
AMACR	ENSG00000082196	604489	Skin-diseases	-	DERMATOLOGIC	#11861706	+
AMACR	ENSG00000082196	604489	Speech-disorders	-	NEUROLOGIC	#15249642	+
AMACR	ENSG00000082196	604489	Spinal-cord-diseases	adrenomyeloneuropathy;myelopathy	NEUROLOGIC	10655068	-
AMACR	ENSG00000082196	604489	Thyroid-diseases	-	ENDOCRINOLOGIC	#10655068	+
AMACR	ENSG00000082196	604489	Tremor	upper-limb-tremor;head-tremor;voice-tremor;postural-tremor;intention-tremor	NEUROLOGIC	15249642	-
AMACR	ENSG00000082196	604489	Vision-disorders	visual-field-restriction;visual-acuity-restriction;Perimetry-abnormal;blindness;failing-vision	OPHTHALMOLOGIC	10655068;15249642;11861706	-
AMACR	ENSG00000082196	604489	Vomiting	nausea;vomiting-and-nausea	GASTROINTESTINAL	15249642;11861706	-
AMT	ENSG00000145020	605899	Aminoacid-levels-abnormal	elevated-glycine;hyperglycinemia;CSF-plasma-glycine-ratio-abnormal	METABOLIC	8005589;9621520;12948742;11139253;16450403	-
AMT	ENSG00000145020	605899	Aminoaciduria	glycinuria	METABOLIC	8005589	-
AMT	ENSG00000145020	605899	Brain-diseases	-	NEUROLOGIC	#8005589;#9600239;#15236413;#16450403;#12948742;#11139253	+
AMT	ENSG00000145020	605899	Cardiorespiratory-arrest	-	CARDIOVASCULAR	8005589;12948742	-
AMT	ENSG00000145020	605899	Cardiovascular-diseases	-	CARDIOVASCULAR	#8005589;#12948742	+
AMT	ENSG00000145020	605899	Central-nervous-system-diseases	-	NEUROLOGIC	#8005589;#9600239;#15236413;#16450403;#12948742;#11139253	+
AMT	ENSG00000145020	605899	Cerebral-atrophy	cerebral-atrophy	NEUROLOGIC	8005589	-
AMT	ENSG00000145020	605899	Consciousness-disorders	coma	NEUROLOGIC	9600239;15236413;16450403	-
AMT	ENSG00000145020	605899	Developmental-delay	psychomotor-retardation	NEUROLOGIC	8005589;12948742;16450403	-
AMT	ENSG00000145020	605899	Digestive-system-diseases	-	GASTROINTESTINAL	#12948742;#15236413	+
AMT	ENSG00000145020	605899	Electroencephalogram-abnormal	burst-suppression-pattern;EEG	NEUROLOGIC	9600239;15236413;16450403	-
AMT	ENSG00000145020	605899	Encephalopathy	glycine-encephalopathy	NEUROLOGIC	8005589;12948742;11139253;16450403	-
AMT	ENSG00000145020	605899	Feeding-difficulties	feeding-problems	GASTROINTESTINAL	12948742	-
AMT	ENSG00000145020	605899	GCC-deficiency	liver;T-protein-deficiency	MISCELLANEOUS	9600239	-
AMT	ENSG00000145020	605899	Hiccup	hiccups	GASTROINTESTINAL	15236413;12948742	-
AMT	ENSG00000145020	605899	Lethargy	-	NEUROLOGIC	8005589;12948742	-
AMT	ENSG00000145020	605899	Mental-retardation	severe	NEUROLOGIC	8005589	-
AMT	ENSG00000145020	605899	Metabolic-diseases	-	METABOLIC	#8005589;#9621520;#12948742;#11139253;#16450403	+
AMT	ENSG00000145020	605899	Muscle-hypotonia	hypotonia	NEUROLOGIC	8005589;9621520;15236413;12948742;16450403	-
AMT	ENSG00000145020	605899	Nervous-system-diseases	-	NEUROLOGIC	#8005589;#9600239;#15236413;#16450403;#12948742;#11139253;#9621520	+
AMT	ENSG00000145020	605899	Neurobehavioral-manifestations	-	NEUROLOGIC	#9600239;#15236413;#16450403;#8005589;#12948742	+
AMT	ENSG00000145020	605899	Neurologic-manifestations	-	NEUROLOGIC	#9600239;#15236413;#16450403;#8005589;#12948742;#9621520	+
AMT	ENSG00000145020	605899	Neuromuscular-manifestations	-	NEUROLOGIC	#8005589;#9621520;#15236413;#12948742;#16450403	+
AMT	ENSG00000145020	605899	Respiration-disorders	respiratory-distress;apnea	RESPIRATORY	9600239;9621520;15236413;12948742;16450403	-
AMT	ENSG00000145020	605899	Respiratory-tract-diseases	-	RESPIRATORY	#9600239;#9621520;#15236413;#12948742;#16450403	+
AMT	ENSG00000145020	605899	Seizures	intractable-seizures	NEUROLOGIC	8005589;9600239;12948742;16450403	-
ATP7B	ENSG00000123191	277900	Abdominal-pain	peritonitis;ascites;abdominal-distension;distension	GASTROINTESTINAL	12211729;10745386;16416207	-
ATP7B	ENSG00000123191	277900	Acid-base-imbalance	-	METABOLIC	#15909172	+
ATP7B	ENSG00000123191	277900	Acidosis	lactic-acidosis;putamen-acidosis;cerebral-acidosis	METABOLIC	15909172	-
ATP7B	ENSG00000123191	277900	Aggression	aggressive;persistent-personality-change	PSYCHIATRIC	9706533	-
ATP7B	ENSG00000123191	277900	Alkaline-phosphatase-abnormal	decreased	MISCELLANEOUS	11060541;12211729	-
ATP7B	ENSG00000123191	277900	Aminoaciduria	generalized;De-Toni-Fanconi-Debre-syndrome	METABOLIC	11060541	-
ATP7B	ENSG00000123191	277900	Anemia	hemolytic-anemia;coombs-positive-hemolytic-anemia	HEMATOLOGIC	12376745;10721669;9160075;15609699;16416207	-
ATP7B	ENSG00000123191	277900	Anxiety-disorders	excessive-anxiety;anxious	PSYCHIATRIC	9160075;8734560	-
ATP7B	ENSG00000123191	277900	Aphasia	dysphasia;agraphia	NEUROLOGIC	10864623;12376745;15909172	-
ATP7B	ENSG00000123191	277900	Arrhythmia	tachycardia;supraventricular-ectopic-beats;contractions-abnormal;fibrillations;heart-block	CARDIOVASCULAR	3829752	-
ATP7B	ENSG00000123191	277900	Arthralgia	osteoarthral-symptoms;joint-pain	MUSCULOSKELETAL	3595645;15636319	-
ATP7B	ENSG00000123191	277900	Arthritis	polyarthritis;small-joint-arthritis;large-joint-arthritis	MUSCULOSKELETAL	15636319;15146013;#15274886;#10925743	-
ATP7B	ENSG00000123191	277900	Ataxia	ataxic-gait;limbs	NEUROLOGIC	15557537;10721669;9160075	-
ATP7B	ENSG00000123191	277900	Basal-ganglia-diseases	basal-ganglia-degeneration;basal-ganglia-softening;basal-ganglia-hypodensities;CT-findings	NEUROLOGIC	8585490;15636319	-
ATP7B	ENSG00000123191	277900	Behavioral-symptoms	behavior-abnormal;behavioral-disturbances;psychiatric-signs;agitation;incongruous-behavior;frontal-lobe-signs;imitation-of-behaviour;suicidal-behavior;behavioral-changes;autoisolation	PSYCHIATRIC	9160075;11086396;9706533;14639035;3052696	-
ATP7B	ENSG00000123191	277900	Biliary-tract-diseases	-	GASTROINTESTINAL	#16381639;#16416207	+
ATP7B	ENSG00000123191	277900	Blood-coagulation-disorders	prothrombin-time-prolonged;epistaxis	HEMATOLOGIC	11060541;12211729;15636319	-
ATP7B	ENSG00000123191	277900	Blood-platelet-disorders	-	HEMATOLOGIC	#682676;#9160075;#16416207	+
ATP7B	ENSG00000123191	277900	Blood-protein-disorders	-	HEMATOLOGIC	#11060541;#12894051	+
ATP7B	ENSG00000123191	277900	Body-temperature-changes	-	MISCELLANEOUS	#12211729;#15909172	+
ATP7B	ENSG00000123191	277900	Bone-diseases	-	MUSCULOSKELETAL	#15636319;#15274886;#10790207;#15368714	+
ATP7B	ENSG00000123191	277900	Bradykinesia	bradykinesia-involving-all-four-limbs	NEUROLOGIC	15636319	-
ATP7B	ENSG00000123191	277900	Brain-diseases	-	NEUROLOGIC	759736;#8585490;#15636319;#15909172;#12376745;#11086396;#11060541;#9706533;#12211729;#3052696;#15146013;#6888480	-
ATP7B	ENSG00000123191	277900	Brain-edema	cytotoxic;cerebral-edema	NEUROLOGIC	15909172;8585490	-
ATP7B	ENSG00000123191	277900	Cardiomyopathy	mild;hypertrophic;dilated	CARDIOVASCULAR	3829752;10790207	-
ATP7B	ENSG00000123191	277900	Cardiorespiratory-arrest	cardiac-death;cardiac-failure	CARDIOVASCULAR	3829752	-
ATP7B	ENSG00000123191	277900	Cardiovascular-diseases	-	CARDIOVASCULAR	#3829752;#10790207	+
ATP7B	ENSG00000123191	277900	Cataract	sunflower-cataracts;bilateral	OPHTHALMOLOGIC	12441847;10864623	-
ATP7B	ENSG00000123191	277900	Catatonia	psychosis-and-catatonia-occurred-more-commonly	NEUROLOGIC	9706533	-
ATP7B	ENSG00000123191	277900	Central-nervous-system-diseases	-	NEUROLOGIC	#759736;#8585490;#15636319;#15557537;#12376745;#15909172;#3052696;#11454376;#9706533;#11086396;#15146013;#10981891;#14639035;#11060541;#12211729;#10864623;#9160075;#15952988;#6888480;#10721669;#3595645	+
ATP7B	ENSG00000123191	277900	Cerebral-atrophy	parenchymal-brain;cortical-atrophy;CT-findings	NEUROLOGIC	12376745;11086396;15636319	-
ATP7B	ENSG00000123191	277900	Cerebral-necrosis	neuronal-necrosis	NEUROLOGIC	15909172	-
ATP7B	ENSG00000123191	277900	Ceruloplasmin-levels-abnormal	decreased;serum;hypoceruloplasminemia	MISCELLANEOUS	15845031;15952988;15557537;10790207;12376745;10721669;10981891;12894051;15368714;10864623;9160075;15909172;11086396;9706533;14639035;11454376;15636319;10877157	-
ATP7B	ENSG00000123191	277900	Cholestasis	cholestasis-in-bile-canaliculi	GASTROINTESTINAL	16381639;16416207	-
ATP7B	ENSG00000123191	277900	Choreatic-disorders	hemichorea;rheumatic-chorea;chorea	NEUROLOGIC	15909172;15146013;9706533	-
ATP7B	ENSG00000123191	277900	Consciousness-disorders	syncopal-episodes	NEUROLOGIC	10721669	-
ATP7B	ENSG00000123191	277900	Copper-levels-abnormal	elevated-nonceruloplasmin-bound-serum-copper;copperuria;copper-overload;copper-in-liver;copper-in-brain;copper-in-kidney;copper-in-cornea;copper-accumulation	MISCELLANEOUS	15845031;15557537;10790207;12376745;11060541;10981891;12894051;15368714;10864623;15909172;11086396;9706533;16416207;14639035;8585490;8734560;10925743;11454376;12441847;16381639;8229372;15636319;10877157	-
ATP7B	ENSG00000123191	277900	Deglutition-disorders	dysphagia;solid-food	GASTROINTESTINAL	15557537;11086396	-
ATP7B	ENSG00000123191	277900	Dementia	cognitive-deficit	PSYCHIATRIC	9706533;8734560;9160075	-
ATP7B	ENSG00000123191	277900	Depressive-disorder	depression;major-depression;suicidal-behavior	PSYCHIATRIC	9706533;9160075;8734560	-
ATP7B	ENSG00000123191	277900	Digestive-system-diseases	-	GASTROINTESTINAL	#12211729;#10745386;#16416207;#16381639;#15557537;#11086396;#10721669;#15609699;#15636319;#15845031;#10981891;#9706533;#759736;#2991870;#8734560;#11454376;#682676;#8229372;#15952988;#12376745;#11060541;#15368714;#12894051;#9160075;#8585490;#15909172;#1463	+
ATP7B	ENSG00000123191	277900	Digestive-system-neoplasms	-	ONCOLOGIC	#2991870;#15609699	+
ATP7B	ENSG00000123191	277900	Dysarthria	severe-dysarthria;barely-comprehensible-speech;slurred-speech;monotone-dysarthria	NEUROLOGIC	15557537;12376745;3595645;11086396;10864623;9706533;14639035	-
ATP7B	ENSG00000123191	277900	Dyskinesias	dysdiadochokinesia;mild	NEUROLOGIC	12376745;9706533;#15636319	-
ATP7B	ENSG00000123191	277900	Dystonic-disorders	intermittent;dystonic-posturing;arms;dystonic-movements;dystonia	NEUROLOGIC	15557537;10981891;11086396;15909172;9706533;14639035;8585490	-
ATP7B	ENSG00000123191	277900	Encephalopathy	hepatic-encephalopathy;systemic-encephalopathy	NEUROLOGIC	11060541;9706533	-
ATP7B	ENSG00000123191	277900	Endocrine-system-diseases	-	ENDOCRINOLOGIC	#10877157;#10790207;#6888480	+
ATP7B	ENSG00000123191	277900	Esophageal-varices	oesophageal-varices	GASTROINTESTINAL	10721669;15609699;16416207;15636319	-
ATP7B	ENSG00000123191	277900	Exercise-intolerance	fatigue	MISCELLANEOUS	16416207;11454376	-
ATP7B	ENSG00000123191	277900	Extrapyramidal-tract-signs	extrapyramidal-signs;extrapyramidal-findings;extrapyramidal-disease	NEUROLOGIC	11086396;759736;8585490;15636319	-
ATP7B	ENSG00000123191	277900	Eye-diseases	-	OPHTHALMOLOGIC	#12441847;#10864623;#15845031;#15952988;#15557537;#12376745;#10721669;#11060541;#10981891;#12894051;#9160075;#9706533;#16416207;#8585490;#15636319	+
ATP7B	ENSG00000123191	277900	Failure-to-thrive	appetite-decreased;anorexia	MISCELLANEOUS	11060541	-
ATP7B	ENSG00000123191	277900	Fatty-liver	steatosis;fibrosis;lesions;macrovesicular-steatosis	GASTROINTESTINAL	15845031;12376745;11060541;10981891;16416207;16381639	-
ATP7B	ENSG00000123191	277900	Female-genital-diseases	-	GENITOURINARY	#10877157;#9160075	+
ATP7B	ENSG00000123191	277900	Fever	-	MISCELLANEOUS	12211729;15909172	-
ATP7B	ENSG00000123191	277900	Gait-disorders	difficulty-walking;limping;shuffling-gait;gait-disturbance	NEUROLOGIC	15557537;12894051;3595645;11086396;9160075;14639035	-
ATP7B	ENSG00000123191	277900	Gastrointestinal-diseases	-	GASTROINTESTINAL	#15557537;#11086396;#10721669;#15609699;#16416207;#15636319	+
ATP7B	ENSG00000123191	277900	Genitourinary-diseases	-	GENITOURINARY	#10877157;#9160075;#15368714;#10790207;#11060541	+
ATP7B	ENSG00000123191	277900	Gonadal-disorders	-	ENDOCRINOLOGIC	#10877157	+
ATP7B	ENSG00000123191	277900	Growth-disorders	-	MISCELLANEOUS	#11060541	+
ATP7B	ENSG00000123191	277900	Gynecomastia	bilateral;rare	DERMATOLOGIC	12894051	-
ATP7B	ENSG00000123191	277900	Headache-disorders	headache	NEUROLOGIC	12211729;3052696	-
ATP7B	ENSG00000123191	277900	Heart-diseases	-	CARDIOVASCULAR	#3829752;#10790207	+
ATP7B	ENSG00000123191	277900	Hematologic-diseases	-	HEMATOLOGIC	#12376745;#10721669;#9160075;#15609699;#16416207;#11060541;#12211729;#15636319;#15368714;#12894051;#682676;#5936452;#8229372	+
ATP7B	ENSG00000123191	277900	Hemoglobin-levels-abnormal	hemoglobin-deficiency	HEMATOLOGIC	11060541;15368714;15609699;16416207;15636319	-
ATP7B	ENSG00000123191	277900	Hepatitis	atypical;prolonged;chronic	GASTROINTESTINAL	10721669;15368714;10745386	-
ATP7B	ENSG00000123191	277900	Hepatocellular-carcinoma	susceptibility;primary-hepatocellular-carcinoma	ONCOLOGIC	2991870;15609699	-
ATP7B	ENSG00000123191	277900	Hepatomegaly	-	GASTROINTESTINAL	15845031;15368714;10745386	-
ATP7B	ENSG00000123191	277900	Hyperbilirubinemia	jaundice;icterus	METABOLIC	11060541;15368714;12211729;10745386;3595645;10864623;9160075;16416207;11454376;16381639	-
ATP7B	ENSG00000123191	277900	Hyperhidrosis	sweating	DERMATOLOGIC	14639035	-
ATP7B	ENSG00000123191	277900	Hyperreflexia	deep-tendon-reflexes-abnormal;slightly-exaggerated;brisk-jaw-jerk;brisk-reflexes	NEUROLOGIC	11086396;15557537;9160075;14639035;15636319	-
ATP7B	ENSG00000123191	277900	Hypoalbuminemia	albumin-levels-decreased	HEMATOLOGIC	11060541;12894051	-
ATP7B	ENSG00000123191	277900	Hypocalcemia	hypocalcemia;hypercalcuria;De-Toni-Fanconi-Debre-syndrome	METABOLIC	15368714;15274886;6888480	-
ATP7B	ENSG00000123191	277900	Hypogonadism	hypogonadism-in-men;male-hypogonadism	ENDOCRINOLOGIC	10877157	-
ATP7B	ENSG00000123191	277900	Hypoparathyroidism	hypoparathyroidism	ENDOCRINOLOGIC	10790207;6888480	-
ATP7B	ENSG00000123191	277900	Hypophosphatemia	hyperphosphaturia;De-Toni-Fanconi-Debre-syndrome	METABOLIC	15274886;6888480	-
ATP7B	ENSG00000123191	277900	Hypotension	-	CARDIOVASCULAR	#3829752	+
ATP7B	ENSG00000123191	277900	Hypouricemia	uric-acid-decreased;serum;uricaciduria;De-Toni-Fanconi-Debre-syndrome	METABOLIC	11060541	-
ATP7B	ENSG00000123191	277900	Immune-system-diseases	-	IMMUNOLOGIC	#15909172	+
ATP7B	ENSG00000123191	277900	Infections	febrile-upper-respiratory-infection	IMMUNOLOGIC	15909172	-
ATP7B	ENSG00000123191	277900	Infertility-female	female-infertility;abortions;gestosis;stillbirth;preterm-births;spontaneous-abortions	GENITOURINARY	10877157	-
ATP7B	ENSG00000123191	277900	Irritability	irritability-and-aggression;persistent-personality-change	NEUROLOGIC	9706533;9160075	-
ATP7B	ENSG00000123191	277900	Joint-diseases	arthropathy	MUSCULOSKELETAL	15636319;#3595645;#15146013;#15274886;#10925743	-
ATP7B	ENSG00000123191	277900	Joint-limitations	flexion-deformity;distal-joints-abnormal;hand;feet;painful-restriction-of-movement	MUSCULOSKELETAL	15636319	-
ATP7B	ENSG00000123191	277900	Kayser-Fleischer-Ring	copper-deposition-ring;cornea-ring;brownish-coloration-in-the-descemet-membrane;slit-lamp-examination	OPHTHALMOLOGIC	15845031;15952988;15557537;12376745;10721669;11060541;10981891;12894051;9160075;9706533;16416207;8585490;12441847;15636319	-
ATP7B	ENSG00000123191	277900	Kidney-diseases	-	GENITOURINARY	#15368714;#10790207;#11060541	+
ATP7B	ENSG00000123191	277900	Lens-diseases	-	OPHTHALMOLOGIC	#12441847;#10864623	+
ATP7B	ENSG00000123191	277900	Leukocyte-disorders	-	HEMATOLOGIC	#682676	+
ATP7B	ENSG00000123191	277900	Leukoencephalopathy	MRI-findings;signal-intensity-abnormalities;white-matter-abnormal;metachromatic-leukodystrophy;leukodystrophy	NEUROLOGIC	8585490;15909172;15146013	-
ATP7B	ENSG00000123191	277900	Leukopenia	-	HEMATOLOGIC	682676	-
ATP7B	ENSG00000123191	277900	Liver-cirrhosis	micronodular;nodularity	GASTROINTESTINAL	15557537;12376745;10721669;11060541;10981891;12894051;15609699;9160075;16416207;8585490;11454376;16381639	-
ATP7B	ENSG00000123191	277900	Liver-diseases	hepatic-failure;hepatic-coma;liver-necrosis;hepato-lenticular-degeneration	GASTROINTESTINAL	15845031;10721669;10981891;9706533;759736;2991870;8734560;11454376;682676;8229372;15952988;#12376745;#11060541;#16416207;#16381639;#15368714;#10745386;#15557537;#12894051;#15609699;#9160075;#8585490;#15909172;#14639035;#15636319	-
ATP7B	ENSG00000123191	277900	Liver-enzymes-abnormal	ALT-elevated;AST-elevated;GGT-elevated	GASTROINTESTINAL	15557537;12376745;11060541;12894051;15368714;10745386;9160075;15909172;16416207;14639035;15636319	-
ATP7B	ENSG00000123191	277900	Lung-diseases	-	RESPIRATORY	#11454376	+
ATP7B	ENSG00000123191	277900	Memory-disorders	cognitive-impairment;impaired-memory;impaired-learning	NEUROLOGIC	9160075;15909172;9706533	-
ATP7B	ENSG00000123191	277900	Menstruation-disturbances	amenorrhea	GENITOURINARY	10877157;9160075	-
ATP7B	ENSG00000123191	277900	Mental-disorders	frontal-lobe-signs;mental-disorder	PSYCHIATRIC	11086396;#9160075;#8734560;#9706533;#10721669;#14639035;#15146013	-
ATP7B	ENSG00000123191	277900	Metabolic-bone-diseases	osteopenia;degenerative-changes;osteophytes	MUSCULOSKELETAL	15636319;#15274886;#10790207;#15368714	-
ATP7B	ENSG00000123191	277900	Metabolic-brain-diseases	PET-findings;positron-emission-tomography;glucose-metabolic-rate-reduced;hypometabolism;cerebellum-abnormal;striatum-abnormal;cerebral-cortex-abnormal;thalamus-abnormal	METABOLIC	9706533	-
ATP7B	ENSG00000123191	277900	Metabolic-diseases	-	METABOLIC	#15909172;#11060541;#15368714;#12211729;#10745386;#3595645;#10864623;#9160075;#16416207;#11454376;#16381639;#15274886;#6888480;#9706533	+
ATP7B	ENSG00000123191	277900	Mitochondria-abnormal	liver;christae-abnormal;pleomorphism	MISCELLANEOUS	11060541;16381639	-
ATP7B	ENSG00000123191	277900	Mood-disorders	affective-disorder;emotional-lability	PSYCHIATRIC	10721669;9160075;9706533;#8734560	-
ATP7B	ENSG00000123191	277900	Movement-disorders	involuntary-movements;intermittend;thumbs;palms;paroxysmal-movements	NEUROLOGIC	15557537;12376745;15909172;3052696;8585490;11454376;#9706533;#15636319;#15146013;#10981891;#11086396;#14639035;#15952988;#10721669;#3595645;#10864623;#9160075	-
ATP7B	ENSG00000123191	277900	Muscle-hypertonia	increased-tone;limbs	NEUROLOGIC	15557537;9160075	-
ATP7B	ENSG00000123191	277900	Muscle-rigidity	shoulder;elbow;wrist-joints;lower-limbs;axial-muscles	NEUROLOGIC	15909172;11086396;14639035;15636319	-
ATP7B	ENSG00000123191	277900	Musculoskeletal-diseases	bone-deformities;lower-extremites	MUSCULOSKELETAL	15146013;#15636319;#3595645;#15274886;#10925743;#10790207;#15368714	-
ATP7B	ENSG00000123191	277900	Neoplasms	-	ONCOLOGIC	#2991870;#15609699	+
ATP7B	ENSG00000123191	277900	Nephrocalcinosis	renal-calculi	GENITOURINARY	15368714	-
ATP7B	ENSG00000123191	277900	Nervous-system-diseases	-	NEUROLOGIC	#12894051;#9706533;#14639035;#10864623;#12376745;#15909172;#15557537;#10721669;#9160075;#759736;#8585490;#15636319;#3052696;#11454376;#11086396;#15146013;#3595645;#10981891;#11060541;#12211729;#15952988;#6888480	+
ATP7B	ENSG00000123191	277900	Neurobehavioral-manifestations	-	NEUROLOGIC	#12894051;#9706533;#14639035;#10864623;#12376745;#15909172;#10721669;#15557537;#3595645;#11086396;#9160075	+
ATP7B	ENSG00000123191	277900	Neurologic-manifestations	-	NEUROLOGIC	#12894051;#9706533;#14639035;#10864623;#12376745;#15909172;#15557537;#10721669;#9160075;#3595645;#11086396;#15636319	+
ATP7B	ENSG00000123191	277900	Neuromuscular-manifestations	-	NEUROLOGIC	#15557537;#9160075;#15909172;#11086396;#14639035;#15636319	+
ATP7B	ENSG00000123191	277900	Neuronal-loss-and-lesions	MRI-findings;signal-intensity-abnormalities;putamen-abnormal;nucleus-caudatus-abnormal;bilateral-symmetric;basal-ganglia-abnormal;midbrain-abnormal;white-matter-abnormal;globus-pallidus-abnormal;claustrum-abnormal;thalamus-abnormal;subcortical-regions-abnormal;mesencephalon-abnormal;pons-abnormal;vermis-abnormal;dentatorubrothalamic-tract-abnormal;pontocerebellar-tract-abnormal	NEUROLOGIC	15557537;15909172;11086396;10864623;9160075;9706533;8585490	-
ATP7B	ENSG00000123191	277900	Orthostatic-hypotension	asymptomatic-orthostatic-hypotension;autonomic-dysfunction	CARDIOVASCULAR	3829752	-
ATP7B	ENSG00000123191	277900	Osteoarthritis	premature-osteoarthritis	MUSCULOSKELETAL	15274886;10925743;15636319	-
ATP7B	ENSG00000123191	277900	Osteomalacia	-	MUSCULOSKELETAL	15274886	-
ATP7B	ENSG00000123191	277900	Osteoporosis	osteoporotic-changes	MUSCULOSKELETAL	10790207;15368714;15274886;15636319	-
ATP7B	ENSG00000123191	277900	Paleness	pale-child;mild-pallor	DERMATOLOGIC	11060541;15636319	-
ATP7B	ENSG00000123191	277900	Pancytopenia	-	HEMATOLOGIC	5936452;8229372	-
ATP7B	ENSG00000123191	277900	Parathyroid-diseases	-	ENDOCRINOLOGIC	#10790207;#6888480	+
ATP7B	ENSG00000123191	277900	Parkinsonian-disorders	parkinsonism;pseudoparkinsonian	NEUROLOGIC	15952988;10981891;8585490;11454376	-
ATP7B	ENSG00000123191	277900	Pathological-fractures	-	MUSCULOSKELETAL	15274886	-
ATP7B	ENSG00000123191	277900	Phosphorus-metabolism-disorders	-	METABOLIC	#15274886;#6888480	+
ATP7B	ENSG00000123191	277900	Pneumonia	-	RESPIRATORY	11454376	-
ATP7B	ENSG00000123191	277900	Pregnancy-complications	complications-during-pregnancy	GENITOURINARY	10877157	-
ATP7B	ENSG00000123191	277900	Pruritus	pruritus;scarring	DERMATOLOGIC	11060541	-
ATP7B	ENSG00000123191	277900	Psychiatric-disorders	-	PSYCHIATRIC	#9160075;#11086396;#9706533;#14639035;#3052696;#8734560;#10721669;#15146013	+
ATP7B	ENSG00000123191	277900	Psychotic-disorders	psychosis;psychosis-and-catatonia-occurred-more-commonly	PSYCHIATRIC	9706533;14639035	-
ATP7B	ENSG00000123191	277900	Pyramidal-tract-signs	pseudobulbar-palsy;pseudobulbar-paralysis;extensor-plantar-response;babinski-sign;chaddock-sign;hoffmann-sign;pyramidal-signs	NEUROLOGIC	11086396;14639035	-
ATP7B	ENSG00000123191	277900	RCCI-deficiency	liver	MISCELLANEOUS	10981891	-
ATP7B	ENSG00000123191	277900	RCCII-deficiency	liver	MISCELLANEOUS	10981891	-
ATP7B	ENSG00000123191	277900	RCCIII-deficiency	liver	MISCELLANEOUS	10981891	-
ATP7B	ENSG00000123191	277900	RCCIV-deficiency	liver	MISCELLANEOUS	10981891	-
ATP7B	ENSG00000123191	277900	Reflexes-abnormal	-	NEUROLOGIC	#11086396;#15557537;#9160075;#14639035;#15636319	+
ATP7B	ENSG00000123191	277900	Renal-insufficiency	renal-tubular-damage	GENITOURINARY	10790207;11060541;15368714	-
ATP7B	ENSG00000123191	277900	Respiratory-tract-diseases	-	RESPIRATORY	#11454376	+
ATP7B	ENSG00000123191	277900	Salivary-gland-diseases	-	MISCELLANEOUS	#3595645;#14639035	+
ATP7B	ENSG00000123191	277900	Schizophrenia	schizophrenia-like	PSYCHIATRIC	15146013;11086396;8734560	-
ATP7B	ENSG00000123191	277900	Schizophrenia-and-psychotic-disorders	-	PSYCHIATRIC	#9706533;#14639035;#15146013;#11086396;#8734560	+
ATP7B	ENSG00000123191	277900	Seizures	tetany;spasms;epilepsy;maybe-treatment-related;grand-mal;partial-complex;convulsions;tonic-clonic-seizures;epileptic	NEUROLOGIC	3052696;6888480	-
ATP7B	ENSG00000123191	277900	Sialorrhea	drooling;hypersalivation	MISCELLANEOUS	3595645;14639035	-
ATP7B	ENSG00000123191	277900	Skin-diseases	-	DERMATOLOGIC	#12894051;#14639035;#11060541;#15636319	+
ATP7B	ENSG00000123191	277900	Sleep-disorders	insomnia;nocturnal-insomnia	NEUROLOGIC	14639035	-
ATP7B	ENSG00000123191	277900	Speech-disorders	difficulty-in-speech;speech-problems;speech-difficulties	NEUROLOGIC	12894051;9706533;14639035;#10864623;#12376745;#15909172;#15557537;#3595645;#11086396	-
ATP7B	ENSG00000123191	277900	Spinal-cord-diseases	corticospinal-tract-abnormalites	NEUROLOGIC	8585490	-
ATP7B	ENSG00000123191	277900	Spinal-diseases	spine-osteochondritis	MUSCULOSKELETAL	15274886	-
ATP7B	ENSG00000123191	277900	Splenomegaly	hepatosplenomegaly;hypersplenism	MISCELLANEOUS	15845031;12894051;8229372;9160075;15636319	-
ATP7B	ENSG00000123191	277900	Stroke-like-episodes	strokelike-presentation;sudden-onset-of-neurologic-syndrome	NEUROLOGIC	15557537	-
ATP7B	ENSG00000123191	277900	Sweat-gland-diseases	-	DERMATOLOGIC	#14639035	+
ATP7B	ENSG00000123191	277900	Thrombocytopenia	platelets-decreased	HEMATOLOGIC	682676;9160075;16416207	-
ATP7B	ENSG00000123191	277900	Tremor	postural-tremor;hand-tremor;resting-tremor;fine-tremor-of-extremities;tremulousness	NEUROLOGIC	12376745;10721669;3595645;15636319;10864623;9160075;9706533;11454376	-
ATP7B	ENSG00000123191	277900	Urologic-diseases	-	GENITOURINARY	#15368714;#10790207;#11060541	+
ATP7B	ENSG00000123191	277900	Vascular-diseases	-	CARDIOVASCULAR	#3829752	+
ATP7B	ENSG00000123191	277900	Vision-disorders	decreased-vision;progressive-visual-loss;visual-symptoms	OPHTHALMOLOGIC	12441847	-
ATP7B	ENSG00000123191	277900	Vomiting	nausea	GASTROINTESTINAL	15368714;12211729	-
ATP7B	ENSG00000123191	277900	Water-electrolyte-imbalance	-	METABOLIC	#15368714;#15274886;#6888480	+
ATPAF2	ENSG00000171953	604273	Acid-base-imbalance	-	METABOLIC	#14757859	+
ATPAF2	ENSG00000171953	604273	Acidosis	lactic-acidosis	METABOLIC	14757859	-
ATPAF2	ENSG00000171953	604273	Aminoacid-levels-abnormal	elevated-alanine	METABOLIC	14757859	-
ATPAF2	ENSG00000171953	604273	Aminoaciduria	increased-urinary-amino-acids	METABOLIC	14757859	-
ATPAF2	ENSG00000171953	604273	Blood-circulation-disorder	poor-peripheral-circulation	CARDIOVASCULAR	14757859	-
ATPAF2	ENSG00000171953	604273	Bone-diseases	-	MUSCULOSKELETAL	#14757859	+
ATPAF2	ENSG00000171953	604273	Brain-diseases	-	NEUROLOGIC	#14757859	+
ATPAF2	ENSG00000171953	604273	Cardiorespiratory-arrest	cardiac-arrest;several-episodes	CARDIOVASCULAR	14757859	-
ATPAF2	ENSG00000171953	604273	Cardiovascular-diseases	-	CARDIOVASCULAR	#14757859	+
ATPAF2	ENSG00000171953	604273	Central-nervous-system-diseases	-	NEUROLOGIC	#14757859	+
ATPAF2	ENSG00000171953	604273	Cerebral-atrophy	cortical-atrophy;subcortical;basal-ganglia	NEUROLOGIC	14757859	-
ATPAF2	ENSG00000171953	604273	Cerebrovascular-disorders	-	NEUROLOGIC	#14757859	+
ATPAF2	ENSG00000171953	604273	Congenital-heart-defects	congenital-heart-defect;small-left-ventricle	CARDIOVASCULAR	14757859	-
ATPAF2	ENSG00000171953	604273	Corpus-callosum-hypoplasia	dysgenesis;absent-anterior-genu;absent-rostrum	NEUROLOGIC	14757859	-
ATPAF2	ENSG00000171953	604273	Craniofacial-abnormalities	-	MUSCULOSKELETAL	#14757859	+
ATPAF2	ENSG00000171953	604273	Developmental-delay	psychomotor-retardation	NEUROLOGIC	14757859	-
ATPAF2	ENSG00000171953	604273	Digestive-system-diseases	-	GASTROINTESTINAL	#14757859	+
ATPAF2	ENSG00000171953	604273	Dysmorphism-and-abnormalities	micrognathia;short-philtrum;low-set-ears;prominent-nasal-bridge;camptodactyly;craniofacial-dysmorphism;contractures;rocker-bottom-feet;blepharophimosis;Cerebro-oculofacioskeletal-syndrome-like	MISCELLANEOUS	14757859	-
ATPAF2	ENSG00000171953	604273	Failure-to-thrive	-	MISCELLANEOUS	14757859	-
ATPAF2	ENSG00000171953	604273	Genitourinary-diseases	-	GENITOURINARY	#14757859	+
ATPAF2	ENSG00000171953	604273	Growth-disorders	-	MISCELLANEOUS	#14757859	+
ATPAF2	ENSG00000171953	604273	Hepatomegaly	-	GASTROINTESTINAL	14757859	-
ATPAF2	ENSG00000171953	604273	Hypotension	hypotensive	CARDIOVASCULAR	14757859	-
ATPAF2	ENSG00000171953	604273	Immune-system-diseases	-	IMMUNOLOGIC	#14757859	+
ATPAF2	ENSG00000171953	604273	Infections	intercurrent	IMMUNOLOGIC	14757859	-
ATPAF2	ENSG00000171953	604273	Intracranial-hemorrhages	intraventricular-haemorrhage;Cerebral-ultrasound-findings	NEUROLOGIC	14757859	-
ATPAF2	ENSG00000171953	604273	Kidney-diseases	kidney-hypoplasia;hypoplastic-kidneys	GENITOURINARY	14757859	-
ATPAF2	ENSG00000171953	604273	Leukoencephalopathy	white-matter-disease;white-matter-hypoplasia	NEUROLOGIC	14757859	-
ATPAF2	ENSG00000171953	604273	Liver-diseases	-	GASTROINTESTINAL	#14757859	+
ATPAF2	ENSG00000171953	604273	Mental-retardation	-	NEUROLOGIC	14757859	-
ATPAF2	ENSG00000171953	604273	Metabolic-diseases	-	METABOLIC	#14757859	+
ATPAF2	ENSG00000171953	604273	Methylglutaconic-aciduria	increased-urinary-methylglutaconic-acid	METABOLIC	14757859	-
ATPAF2	ENSG00000171953	604273	Microcephaly	-	MUSCULOSKELETAL	14757859	-
ATPAF2	ENSG00000171953	604273	Muscle-hypertonia	-	NEUROLOGIC	14757859	-
ATPAF2	ENSG00000171953	604273	Muscle-hypotonia	progressive	NEUROLOGIC	14757859	-
ATPAF2	ENSG00000171953	604273	Musculoskeletal-diseases	-	MUSCULOSKELETAL	#14757859	+
ATPAF2	ENSG00000171953	604273	Nervous-system-diseases	-	NEUROLOGIC	#14757859	+
ATPAF2	ENSG00000171953	604273	Neurobehavioral-manifestations	-	NEUROLOGIC	#14757859	+
ATPAF2	ENSG00000171953	604273	Neurologic-manifestations	-	NEUROLOGIC	#14757859	+
ATPAF2	ENSG00000171953	604273	Neuromuscular-manifestations	-	NEUROLOGIC	#14757859	+
ATPAF2	ENSG00000171953	604273	Organic-acids-abnormal	lactic-aciduria;elevated-tricarboxylic-acid-cycle-intermediates;methylglutaconic-aciduria	METABOLIC	14757859	-
ATPAF2	ENSG00000171953	604273	RCCIV-deficiency	liver	MISCELLANEOUS	14757859	-
ATPAF2	ENSG00000171953	604273	RCCV-deficiency	liver;muscle	MISCELLANEOUS	14757859	-
ATPAF2	ENSG00000171953	604273	Renal-insufficiency	due-to-kidney-hypoplasia	GENITOURINARY	14757859	-
ATPAF2	ENSG00000171953	604273	Seizures	-	NEUROLOGIC	14757859	-
ATPAF2	ENSG00000171953	604273	Spinal-diseases	kyphoscoliosis	MUSCULOSKELETAL	14757859	-
ATPAF2	ENSG00000171953	604273	TCA-intermediates-elevated	tricarboxylic-acid-cycle-intermediates-elevated;increased-urinary-fumarate	METABOLIC	14757859	-
ATPAF2	ENSG00000171953	604273	Urologic-diseases	-	GENITOURINARY	#14757859	+
ATPAF2	ENSG00000171953	604273	Vascular-diseases	-	CARDIOVASCULAR	#14757859	+
AUH	ENSG00000148090	250950	Acid-base-imbalance	-	METABOLIC	#3082934;#9762598	+
AUH	ENSG00000148090	250950	Acidosis	hyperchloraemic-acidosis	METABOLIC	3082934;9762598	-
AUH	ENSG00000148090	250950	Acylcarnitine-profile-abnormal	elevated-3-hydroxyisovalerylcarnitine;elevated-C5-hydroxy-acylcarnitine	METABOLIC	15033206;12655555	-
AUH	ENSG00000148090	250950	Basal-ganglia-diseases	atrophy;basal-ganglia-atrophy	NEUROLOGIC	6181239;9762598	-
AUH	ENSG00000148090	250950	Behavioral-symptoms	-	PSYCHIATRIC	#9762598	+
AUH	ENSG00000148090	250950	Body-temperature-changes	-	MISCELLANEOUS	#15033206	+
AUH	ENSG00000148090	250950	Bone-diseases	-	MUSCULOSKELETAL	#9762598	+
AUH	ENSG00000148090	250950	Brain-diseases	-	NEUROLOGIC	#6181239;#9762598;#10896289;#15033206	+
AUH	ENSG00000148090	250950	Carnitine-levels-abnormal	free-carnitine-abnormal;decreased	METABOLIC	9762598;12655555	-
AUH	ENSG00000148090	250950	Central-nervous-system-diseases	-	NEUROLOGIC	#6181239;#9762598;#10896289;#15033206	+
AUH	ENSG00000148090	250950	Consciousness-disorders	coma	NEUROLOGIC	10896289;3082934	-
AUH	ENSG00000148090	250950	Craniofacial-abnormalities	-	MUSCULOSKELETAL	#9762598	+
AUH	ENSG00000148090	250950	Creatine-kinase-abnormal	elevated-creatine-kinase	MISCELLANEOUS	9762598	-
AUH	ENSG00000148090	250950	Developmental-delay	psychomotor-retardation;speech-retardation	NEUROLOGIC	12434311;10896289;3082934	-
AUH	ENSG00000148090	250950	Digestive-system-diseases	-	GASTROINTESTINAL	#9762598	+
AUH	ENSG00000148090	250950	Dystonic-disorders	dystonic;involuntary-movements;dystonic-cerebral-palsy	NEUROLOGIC	10896289;9762598	-
AUH	ENSG00000148090	250950	Encephalopathy	hypoxic-ischemic	NEUROLOGIC	9762598	-
AUH	ENSG00000148090	250950	Feeding-difficulties	gastroesophageal-reflux	GASTROINTESTINAL	9762598	-
AUH	ENSG00000148090	250950	Fever	-	MISCELLANEOUS	15033206	-
AUH	ENSG00000148090	250950	Genitourinary-diseases	-	GENITOURINARY	#10896289	+
AUH	ENSG00000148090	250950	Glucose-metabolism-disorders	-	METABOLIC	#3082934;#9762598	+
AUH	ENSG00000148090	250950	Growth-deficiency	-	MISCELLANEOUS	9762598	-
AUH	ENSG00000148090	250950	Growth-disorders	-	MISCELLANEOUS	#9762598	+
AUH	ENSG00000148090	250950	Hepatomegaly	-	GASTROINTESTINAL	9762598	-
AUH	ENSG00000148090	250950	Hydroxyisovaleric-aciduria	3-hydroxyisovaleric-acid-elevated	METABOLIC	12434311;6181239;10896289;9762598;15033206;12655555	-
AUH	ENSG00000148090	250950	Hyperreflexia	generalized-hyperreflexia	NEUROLOGIC	9762598	-
AUH	ENSG00000148090	250950	Hyperventilation	persistent-tachypnea;transient-tachypnoea	RESPIRATORY	9762598	-
AUH	ENSG00000148090	250950	Hypoglycemia	epsisodic	METABOLIC	3082934;9762598	-
AUH	ENSG00000148090	250950	Immune-system-diseases	-	IMMUNOLOGIC	#9762598;#15033206	+
AUH	ENSG00000148090	250950	Infections	bronchiolitis;viral-infections;respiratory-tract-infections	IMMUNOLOGIC	9762598;15033206	-
AUH	ENSG00000148090	250950	Irritability	screaming	NEUROLOGIC	9762598	-
AUH	ENSG00000148090	250950	Liver-diseases	-	GASTROINTESTINAL	#9762598	+
AUH	ENSG00000148090	250950	Mental-retardation	moderate	NEUROLOGIC	9762598	-
AUH	ENSG00000148090	250950	Metabolic-brain-diseases	-	METABOLIC	#10896289	+
AUH	ENSG00000148090	250950	Metabolic-diseases	-	METABOLIC	#3082934;#9762598;#15033206;#12655555;#12434311;#6181239;#10896289	+
AUH	ENSG00000148090	250950	Methylglutaconic-aciduria	3-methylglutaconic-acids-elevated	METABOLIC	12434311;6181239;10896289;9762598;15033206;12655555;3082934	-
AUH	ENSG00000148090	250950	Microcephaly	-	MUSCULOSKELETAL	9762598	-
AUH	ENSG00000148090	250950	Movement-disorders	-	NEUROLOGIC	#10896289;#9762598	+
AUH	ENSG00000148090	250950	Muscle-hypertonia	-	NEUROLOGIC	9762598	-
AUH	ENSG00000148090	250950	Muscle-hypotonia	-	NEUROLOGIC	10896289;9762598	-
AUH	ENSG00000148090	250950	Muscle-spasticity	paraplegia;cerebral-palsy;spastic-quadriplegia	NEUROLOGIC	10896289;9762598	-
AUH	ENSG00000148090	250950	Musculoskeletal-diseases	-	MUSCULOSKELETAL	#9762598	+
AUH	ENSG00000148090	250950	Nervous-system-diseases	-	NEUROLOGIC	#6181239;#9762598;#10896289;#3082934;#12434311;#15033206	+
AUH	ENSG00000148090	250950	Neurobehavioral-manifestations	-	NEUROLOGIC	#10896289;#3082934;#9762598;#12434311;#6181239	+
AUH	ENSG00000148090	250950	Neurologic-manifestations	-	NEUROLOGIC	#10896289;#3082934;#9762598;#12434311;#6181239	+
AUH	ENSG00000148090	250950	Neuromuscular-manifestations	-	NEUROLOGIC	#9762598;#10896289	+
AUH	ENSG00000148090	250950	Neuronal-loss-and-lesions	MRI-findings;signal-intensity-abnormalities;basal-ganglia-abnormal;basal-ganglia-atrophy;globus-pallidus-abnormal;white-matter-abnormal	NEUROLOGIC	9762598	-
AUH	ENSG00000148090	250950	Organic-acids-abnormal	3-methylglutaconic-aciduria;3-methylglutaric-aciduria;3-hydroxyisovaleric-aciduria	METABOLIC	12434311;6181239;10896289;9762598;15033206;12655555;#3082934	-
AUH	ENSG00000148090	250950	Paralysis-Paresis	paraplegia;cerebral-palsy;spastic-quadriplegia	NEUROLOGIC	10896289;9762598	-
AUH	ENSG00000148090	250950	Psychiatric-disorders	-	PSYCHIATRIC	#9762598	+
AUH	ENSG00000148090	250950	Psychomotor-agitation	attention-deficit;short-attention-span;hyperactivity	NEUROLOGIC	10896289;3082934	-
AUH	ENSG00000148090	250950	Reflexes-abnormal	-	NEUROLOGIC	#9762598	+
AUH	ENSG00000148090	250950	Respiration-disorders	-	RESPIRATORY	#9762598	+
AUH	ENSG00000148090	250950	Respiratory-tract-diseases	-	RESPIRATORY	#9762598	+
AUH	ENSG00000148090	250950	Reye-like-symptoms	reye-syndrome-like	METABOLIC	10896289	-
AUH	ENSG00000148090	250950	Seizures	tonic-clonic-seizures	NEUROLOGIC	10896289;9762598;15033206	-
AUH	ENSG00000148090	250950	Self-injurious-behavior	self-injurious;self-mutilation	PSYCHIATRIC	9762598	-
AUH	ENSG00000148090	250950	Sleep-disorders	insomnia	NEUROLOGIC	9762598	-
AUH	ENSG00000148090	250950	Speech-disorders	speech-development-retarded;speech-retardation;partial-dyslalia	NEUROLOGIC	12434311;6181239;10896289	-
AUH	ENSG00000148090	250950	Spinal-diseases	scoliosis	MUSCULOSKELETAL	9762598	-
AUH	ENSG00000148090	250950	Urination-disorders	enuresis;urinary-incontinence	GENITOURINARY	10896289	-
AUH	ENSG00000148090	250950	Urologic-diseases	-	GENITOURINARY	#10896289	+
AUH	ENSG00000148090	250950	Vomiting	gastroesophageal-reflux	GASTROINTESTINAL	9762598	-
BAX	ENSG00000087088	114500	Colorectal-neoplasms	colon-adenocarcinoma;colon-cancer	ONCOLOGIC	9020077;15743744;9453486	-
BAX	ENSG00000087088	114500	Digestive-system-neoplasms	-	ONCOLOGIC	#9020077;#15743744;#9453486	+
BAX	ENSG00000087088	114500	Neoplasms	-	ONCOLOGIC	#9020077;#15743744;#9453486	+
BAX	ENSG00000087088	137215	Digestive-system-neoplasms	-	ONCOLOGIC	#9331106	+
BAX	ENSG00000087088	137215	Neoplasms	-	ONCOLOGIC	#9331106	+
BAX	ENSG00000087088	137215	Stomach-neoplasms	gastric-adenocarcinomas;gastric-cancer	ONCOLOGIC	9331106	-
BAX	ENSG00000087088	600040	Bone-marrow-diseases	hematopoietic-abnormalities;plasmacytoma;hematopoietic-malignancies	HEMATOLOGIC	9531611;7475270	-
BAX	ENSG00000087088	600040	Hematologic-diseases	-	HEMATOLOGIC	#9531611;#7475270	+
BAX	ENSG00000087088	600040	Leukemia-Lymphoma	acute-lymphoblastic-leukemia;ALL	ONCOLOGIC	9531611;9583678;7475270	-
BAX	ENSG00000087088	600040	Neoplasms	-	ONCOLOGIC	#9531611;#9583678;#7475270	+
BCKDHA	ENSG00000142046	248600	Abdominal-pain	epigastric-pain	GASTROINTESTINAL	12042535	-
BCKDHA	ENSG00000142046	248600	Acid-base-imbalance	-	METABOLIC	#2703538;#2060625;#1885764;#14567968;#12042535;#8161368	+
BCKDHA	ENSG00000142046	248600	Aminoacid-levels-abnormal	elevated-leucine;elevated-isoleucine;elevated-valine;elevated-alloisoleucine;leucinosis;leucine-alanine-ratio-abnormal	METABOLIC	7883996;16601891;12118532;7707687;14742428;14567968;14517957;12042535;16786533;11825067;10694918;8161368	-
BCKDHA	ENSG00000142046	248600	Ataxia	acute;transient	NEUROLOGIC	7883996;14567968;12042535	-
BCKDHA	ENSG00000142046	248600	Athetosis	choreoathetosis;athetoid-movements	NEUROLOGIC	12042535	-
BCKDHA	ENSG00000142046	248600	BCKDH-deficiency	fibroblasts;residual-enzyme-activity	MISCELLANEOUS	7883996;14517957;16601891;1885764;7707687;14742428;14567968;12042535;2703538;16786533;11825067;10694918;2060625;8161368	-
BCKDHA	ENSG00000142046	248600	Body-temperature-changes	-	MISCELLANEOUS	#7883996	+
BCKDHA	ENSG00000142046	248600	Brain-diseases	-	NEUROLOGIC	#16601891;#14567968;#12042535;#7883996;#14517957;#12118532;#7672509;#1885764;#14742428;#8161368	+
BCKDHA	ENSG00000142046	248600	Brain-edema	cerebral-edema;grey-matter-edema	NEUROLOGIC	16601891;14567968;12042535	-
BCKDHA	ENSG00000142046	248600	Cardiorespiratory-arrest	high-mortality;death;died-in-infancy	CARDIOVASCULAR	2060625;7883996;7672509;1885764;14742428;16786533;10694918	-
BCKDHA	ENSG00000142046	248600	Cardiovascular-diseases	-	CARDIOVASCULAR	#2060625;#7883996;#7672509;#1885764;#14742428;#16786533;#10694918	+
BCKDHA	ENSG00000142046	248600	Central-nervous-system-diseases	-	NEUROLOGIC	#7883996;#12042535;#16601891;#14567968;#14517957;#12118532;#7672509;#1885764;#14742428;#8161368	+
BCKDHA	ENSG00000142046	248600	Cerebellar-atrophy	MRI-findings;cerebellar-volume-loss	NEUROLOGIC	16601891	-
BCKDHA	ENSG00000142046	248600	Choreatic-disorders	choreoathetosis	NEUROLOGIC	12042535	-
BCKDHA	ENSG00000142046	248600	Consciousness-disorders	coma;unconsciousness	NEUROLOGIC	7883996;14517957;1885764;12118532;14742428;14567968	-
BCKDHA	ENSG00000142046	248600	Craniofacial-abnormalities	-	MUSCULOSKELETAL	#7883996;#16601891;#12042535	+
BCKDHA	ENSG00000142046	248600	Developmental-delay	psychomotor-retardation;inability-to-sit;inability-to-stand;inability-to-crawl;speech-delay;language-delay	NEUROLOGIC	7883996;16601891;12042535;16786533	-
BCKDHA	ENSG00000142046	248600	Digestive-system-diseases	-	GASTROINTESTINAL	#12042535;#7883996;#8779622;#16601891;#14742428;#14567968	+
BCKDHA	ENSG00000142046	248600	Dystonic-disorders	dystonia;dystonic;dystonic-posturing;dystonic-rigidity	NEUROLOGIC	12042535	-
BCKDHA	ENSG00000142046	248600	Electroencephalogram-abnormal	disorganized-patter;paroxysmal-spikes	NEUROLOGIC	7883996	-
BCKDHA	ENSG00000142046	248600	Encephalopathy	brain-dysfunction;encephalopatic;full-fontanels	NEUROLOGIC	14517957;12118532;12042535	-
BCKDHA	ENSG00000142046	248600	Failure-to-thrive	-	MISCELLANEOUS	8779622	-
BCKDHA	ENSG00000142046	248600	Feeding-difficulties	gagging-and-coughing-with-feeds;gastrostomy-tube-feeding;poor-feeding;difficult-to-feed	GASTROINTESTINAL	7883996;8779622;16601891;14742428;12042535	-
BCKDHA	ENSG00000142046	248600	Fever	-	MISCELLANEOUS	7883996	-
BCKDHA	ENSG00000142046	248600	Gait-disorders	broad-based	NEUROLOGIC	7883996	-
BCKDHA	ENSG00000142046	248600	Gastroenteritis	metabolic-decompensation-triggered-by-gastroenteritis	GASTROINTESTINAL	12042535	-
BCKDHA	ENSG00000142046	248600	Gastrointestinal-diseases	-	GASTROINTESTINAL	#12042535	+
BCKDHA	ENSG00000142046	248600	Growth-deficiency	poor-growth	MISCELLANEOUS	7883996;16601891;12042535	-
BCKDHA	ENSG00000142046	248600	Growth-disorders	-	MISCELLANEOUS	#8779622;#7883996;#16601891;#12042535	+
BCKDHA	ENSG00000142046	248600	Hallucinations	-	NEUROLOGIC	14567968;12042535	-
BCKDHA	ENSG00000142046	248600	Hyperammonemia	-	METABOLIC	16601891	-
BCKDHA	ENSG00000142046	248600	Hyperreflexia	brisk-reflexes;lower-extremities	NEUROLOGIC	7883996;12042535	-
BCKDHA	ENSG00000142046	248600	Hyponatremia	serum-sodium-decreased	METABOLIC	12042535	-
BCKDHA	ENSG00000142046	248600	Immune-system-diseases	-	IMMUNOLOGIC	#7883996;#16601891;#12118532;#14567968;#12042535	+
BCKDHA	ENSG00000142046	248600	Infections	otitis-media;respiratory-tract-infections;intercurrent-infections;infection-triggered-episodes;sepsis;candidasis	IMMUNOLOGIC	7883996;16601891;12118532;14567968;12042535	-
BCKDHA	ENSG00000142046	248600	Irritability	excessive-irritability;irritable	NEUROLOGIC	7883996;12042535	-
BCKDHA	ENSG00000142046	248600	Ketosis	ketoacidosis;ketonuria;urinary-ketones	METABOLIC	2703538;2060625;1885764;14567968;12042535;8161368	-
BCKDHA	ENSG00000142046	248600	Lethargy	lethargic	NEUROLOGIC	7883996;14742428;14567968;12042535	-
BCKDHA	ENSG00000142046	248600	Lung-diseases	-	RESPIRATORY	#7883996	+
BCKDHA	ENSG00000142046	248600	Mental-retardation	-	NEUROLOGIC	2703538;2060625;7672509;1885764;14567968;8161368	-
BCKDHA	ENSG00000142046	248600	Metabolic-diseases	-	METABOLIC	#7883996;#16601891;#12118532;#7707687;#14742428;#14567968;#14517957;#12042535;#16786533;#11825067;#10694918;#8161368;#2703538;#2060625;#1885764	+
BCKDHA	ENSG00000142046	248600	Microcephaly	poor-head-growth	MUSCULOSKELETAL	7883996;16601891;12042535	-
BCKDHA	ENSG00000142046	248600	Movement-disorders	hyperkinesis	NEUROLOGIC	7883996;#12042535	-
BCKDHA	ENSG00000142046	248600	Muscle-hypotonia	profound-hypotonia;myopathic-facies	NEUROLOGIC	7883996;16601891	-
BCKDHA	ENSG00000142046	248600	Muscle-rigidity	jaw-rigidity;hypopharnyx-rigidity	NEUROLOGIC	12042535	-
BCKDHA	ENSG00000142046	248600	Muscular-diseases	Biopsy-finding;non-specific-abnormalities;myofibre-atrophy;fibres-with-increased-lipid;muscular-atrophy	MUSCULOSKELETAL	16601891	-
BCKDHA	ENSG00000142046	248600	Musculoskeletal-diseases	-	MUSCULOSKELETAL	#7883996;#16601891;#12042535	+
BCKDHA	ENSG00000142046	248600	Nervous-system-diseases	-	NEUROLOGIC	#7883996;#14567968;#12042535;#16601891;#14517957;#1885764;#12118532;#14742428;#16786533;#2703538;#2060625;#7672509;#8161368	+
BCKDHA	ENSG00000142046	248600	Neurobehavioral-manifestations	-	NEUROLOGIC	#7883996;#14517957;#1885764;#12118532;#14742428;#14567968;#12042535;#2703538;#2060625;#7672509;#8161368;#16601891	+
BCKDHA	ENSG00000142046	248600	Neurologic-manifestations	-	NEUROLOGIC	#7883996;#14567968;#12042535;#14517957;#1885764;#12118532;#14742428;#2703538;#2060625;#7672509;#8161368;#16601891	+
BCKDHA	ENSG00000142046	248600	Neuromuscular-manifestations	-	NEUROLOGIC	#7883996;#16601891;#12042535	+
BCKDHA	ENSG00000142046	248600	Neuronal-loss-and-lesions	MRI-findings;signal-intensity-abnormalities;bilateral-symmetric;globus-pallidus-abnormal;pons-abnormal;midbrain-abnormal;myelin-maturation-delayed	NEUROLOGIC	16601891;12042535	-
BCKDHA	ENSG00000142046	248600	Odors	maple-syrup-odor;burned-sugar-odor;maple-syrup-in-cerumen	MISCELLANEOUS	7672509;12042535;8161368	-
BCKDHA	ENSG00000142046	248600	Organic-acids-abnormal	2-oxoisocaproic-aciduria;2-oxo-3-methylvaleric-aciduria;2-oxoisovaleric-aciduria;2-hydroxyisovaleric-aciduria;2-hydroxyisocaproic-aciduria;2-hydroxy-3-methylvaleric-aciduria;branched-chain-ketoaciduria;2-oxo-aciduria;positive-urinary-DNPH-reaction	METABOLIC	16601891;12118532;7707687;14742428;14567968	-
BCKDHA	ENSG00000142046	248600	Pancreatic-diseases	-	GASTROINTESTINAL	#12042535	+
BCKDHA	ENSG00000142046	248600	Pancreatitis	occasionally;acute-pancreatitis	GASTROINTESTINAL	12042535	-
BCKDHA	ENSG00000142046	248600	Perceptual-disorders	-	NEUROLOGIC	#14567968;#12042535	+
BCKDHA	ENSG00000142046	248600	Pneumonia	recurrent-pneumonias	RESPIRATORY	7883996	-
BCKDHA	ENSG00000142046	248600	Psychomotor-agitation	hyperactivity;agitation;attention-deficit-disorder;correlated-to-plasma-leucine-level	NEUROLOGIC	12042535	-
BCKDHA	ENSG00000142046	248600	Pyramidal-tract-signs	extensor-plantar-response;babinski-sign	NEUROLOGIC	12042535	-
BCKDHA	ENSG00000142046	248600	RCCI-deficiency	muscle;fibroblasts	MISCELLANEOUS	16601891	-
BCKDHA	ENSG00000142046	248600	RCCIV-deficiency	muscle;fibroblasts	MISCELLANEOUS	16601891	-
BCKDHA	ENSG00000142046	248600	Reflexes-abnormal	-	NEUROLOGIC	#7883996;#12042535	+
BCKDHA	ENSG00000142046	248600	Respiration-disorders	apnea;respiratory-failure	RESPIRATORY	12042535	-
BCKDHA	ENSG00000142046	248600	Respiratory-tract-diseases	-	RESPIRATORY	#7883996;#12042535	+
BCKDHA	ENSG00000142046	248600	Salt-wasting	urinary-sodium-losses;renal-salt-wasting	METABOLIC	12042535	-
BCKDHA	ENSG00000142046	248600	Seizures	opisthotonos;tonic-clonic-seizures	NEUROLOGIC	7883996;7672509;1885764;14742428;14567968;12042535;8161368	-
BCKDHA	ENSG00000142046	248600	Speech-disorders	no-speech	NEUROLOGIC	16601891	-
BCKDHA	ENSG00000142046	248600	Spinal-cord-diseases	corticospinal-tract-dysfunction	NEUROLOGIC	12042535	-
BCKDHA	ENSG00000142046	248600	Vomiting	-	GASTROINTESTINAL	14567968;12042535	-
BCKDHA	ENSG00000142046	248600	Water-electrolyte-imbalance	-	METABOLIC	#12042535	+
BCKDHB	ENSG00000083123	248600	Acid-base-imbalance	-	METABOLIC	#14567968;#11448970;#8161368	+
BCKDHB	ENSG00000083123	248600	Aminoacid-levels-abnormal	elevated-leucine;elevated-isoleucine;elevated-valine;elevated-alloisoleucine	METABOLIC	2022752;7707687;14742428;14567968;14517957;16786533;11509994;11448970;8312380;8161368	-
BCKDHB	ENSG00000083123	248600	Ataxia	acute;transient	NEUROLOGIC	14567968	-
BCKDHB	ENSG00000083123	248600	BCKDH-deficiency	lymphoblasts	MISCELLANEOUS	2022752;7707687;14742428;14567968;14517957;16786533;11509994;11448970;8312380;8161368	-
BCKDHB	ENSG00000083123	248600	Brain-diseases	-	NEUROLOGIC	#14567968;#14517957;#2022752;#7672509;#14742428;#11448970;#8161368	+
BCKDHB	ENSG00000083123	248600	Brain-edema	cerebral-edema	NEUROLOGIC	14567968	-
BCKDHB	ENSG00000083123	248600	Cardiorespiratory-arrest	death;infant-death	CARDIOVASCULAR	16786533;11509994;11448970	-
BCKDHB	ENSG00000083123	248600	Cardiovascular-diseases	-	CARDIOVASCULAR	#16786533;#11509994;#11448970	+
BCKDHB	ENSG00000083123	248600	Central-nervous-system-diseases	-	NEUROLOGIC	#14567968;#14517957;#2022752;#7672509;#14742428;#11448970;#8161368	+
BCKDHB	ENSG00000083123	248600	Consciousness-disorders	coma	NEUROLOGIC	7672509;14742428;14567968;11448970	-
BCKDHB	ENSG00000083123	248600	Developmental-delay	psychomotor-retardation;intellectual-development-impaired	NEUROLOGIC	16786533;11509994;11448970	-
BCKDHB	ENSG00000083123	248600	Digestive-system-diseases	-	GASTROINTESTINAL	#2022752;#8779622;#14742428;#11448970;#14567968	+
BCKDHB	ENSG00000083123	248600	Encephalopathy	-	NEUROLOGIC	14517957	-
BCKDHB	ENSG00000083123	248600	Failure-to-thrive	-	MISCELLANEOUS	8779622	-
BCKDHB	ENSG00000083123	248600	Feeding-difficulties	poor-feeding	GASTROINTESTINAL	2022752;8779622;14742428;11448970	-
BCKDHB	ENSG00000083123	248600	Growth-disorders	-	MISCELLANEOUS	#8779622	+
BCKDHB	ENSG00000083123	248600	Hallucinations	-	NEUROLOGIC	14567968	-
BCKDHB	ENSG00000083123	248600	Immune-system-diseases	-	IMMUNOLOGIC	#14567968;#11509994;#11448970	+
BCKDHB	ENSG00000083123	248600	Infections	intercurrent-infections;infection-related-metabolic-decompensation	IMMUNOLOGIC	14567968;11509994;11448970	-
BCKDHB	ENSG00000083123	248600	Ketosis	ketoacidosis;ketoaciduria	METABOLIC	14567968;11448970;8161368	-
BCKDHB	ENSG00000083123	248600	Lethargy	-	NEUROLOGIC	14742428;14567968;11448970	-
BCKDHB	ENSG00000083123	248600	Mental-retardation	-	NEUROLOGIC	7672509;14567968;11448970;8161368	-
BCKDHB	ENSG00000083123	248600	Metabolic-diseases	-	METABOLIC	#2022752;#7707687;#14742428;#14567968;#14517957;#16786533;#11509994;#11448970;#8312380;#8161368	+
BCKDHB	ENSG00000083123	248600	Muscle-hypertonia	-	NEUROLOGIC	2022752	-
BCKDHB	ENSG00000083123	248600	Nervous-system-diseases	-	NEUROLOGIC	#14567968;#7672509;#14742428;#11448970;#16786533;#11509994;#14517957;#8161368;#2022752	+
BCKDHB	ENSG00000083123	248600	Neurobehavioral-manifestations	-	NEUROLOGIC	#7672509;#14742428;#14567968;#11448970;#8161368	+
BCKDHB	ENSG00000083123	248600	Neurodegenerative-diseases	-	NEUROLOGIC	11509994	-
BCKDHB	ENSG00000083123	248600	Neurologic-manifestations	-	NEUROLOGIC	#14567968;#7672509;#14742428;#11448970;#8161368;#2022752	+
BCKDHB	ENSG00000083123	248600	Neuromuscular-manifestations	-	NEUROLOGIC	#2022752	+
BCKDHB	ENSG00000083123	248600	Odors	maple-syrup-odor;burned-sugar-odor	MISCELLANEOUS	7672509;11448970;8161368	-
BCKDHB	ENSG00000083123	248600	Organic-acids-abnormal	2-oxoisocaproic-aciduria;2-oxo-3-methylvaleric-aciduria;2-oxoisovaleric-aciduria;2-hydroxyisovaleric-aciduria;2-hydroxyisocaproic-aciduria;2-hydroxy-3-methyvaleric-aciduria;2-oxo-aciduria	METABOLIC	7707687;14742428;14567968;11448970	-
BCKDHB	ENSG00000083123	248600	Perceptual-disorders	-	NEUROLOGIC	#14567968	+
BCKDHB	ENSG00000083123	248600	Seizures	opisthotonos;seizures;convulsions	NEUROLOGIC	2022752;7672509;14742428;14567968;11448970;8161368	-
BCKDHB	ENSG00000083123	248600	Vomiting	-	GASTROINTESTINAL	14567968	-
BCL2	ENSG00000171791	151400	Anemia	hemolytic;autoimmune;refractory-anemia	HEMATOLOGIC	10561025;11699413	-
BCL2	ENSG00000171791	151400	Blood-platelet-disorders	-	HEMATOLOGIC	#10561025	+
BCL2	ENSG00000171791	151400	Blood-protein-disorders	-	HEMATOLOGIC	#10561025;#12200703	+
BCL2	ENSG00000171791	151400	Bone-marrow-diseases	myelodysplasia;bone-marrow-involvement;infiltration;bone-marrow-infiltration;bone-marrow-failure;paratrabecular-nodules;bone-marrow-blastosis	HEMATOLOGIC	11120335;11699413;15748964;12200703;10733261;11557789	-
BCL2	ENSG00000171791	151400	Digestive-system-diseases	-	GASTROINTESTINAL	#10733261;#11557789	+
BCL2	ENSG00000171791	151400	Hematologic-diseases	-	HEMATOLOGIC	#10561025;#11699413;#11120335;#15748964;#12200703;#10733261;#11557789	+
BCL2	ENSG00000171791	151400	Hepatomegaly	-	GASTROINTESTINAL	10733261;11557789	-
BCL2	ENSG00000171791	151400	Hypergammaglobulinemia	hypergammaglobulinemia;T-cell-dysfunction	HEMATOLOGIC	10561025	-
BCL2	ENSG00000171791	151400	Hypoalbuminemia	elevated-lactate-dehydrogenase-(LDH);elevated-beta2-microglobulin;serum-albumin-levels-decreased	HEMATOLOGIC	12200703;10561025	-
BCL2	ENSG00000171791	151400	Immune-deficiency	autoimmune-disease;cellular-immunity-abnormal;humoral-immunity-abnormal;immune-defects	IMMUNOLOGIC	10733261;10561025	-
BCL2	ENSG00000171791	151400	Immune-system-diseases	-	IMMUNOLOGIC	#10733261;#10561025	+
BCL2	ENSG00000171791	151400	Infections	recurrent;opportunistic-pathogens	IMMUNOLOGIC	10561025	-
BCL2	ENSG00000171791	151400	Leukemia-Lymphoma	follicular;follicular-lymphoma;non-hodgkin-lymphoma;lymphocytic-leukemia	ONCOLOGIC	2406517;2648153;8220113;12200703;11224600;11557789;11699413;15748964;11120335	-
BCL2	ENSG00000171791	151400	Leukocyte-disorders	-	HEMATOLOGIC	#10561025	+
BCL2	ENSG00000171791	151400	Leukopenia	autoimmune	HEMATOLOGIC	10561025	-
BCL2	ENSG00000171791	151400	Liver-diseases	-	GASTROINTESTINAL	#10733261;#11557789	+
BCL2	ENSG00000171791	151400	Lymphatic-diseases	lymphadenopathy;adenopathy;lymph-node-involvement	HEMATOLOGIC	11120335;10733261;11557789;15748964;12200703	-
BCL2	ENSG00000171791	151400	Neoplasms	-	ONCOLOGIC	#2406517;#2648153;#8220113;#12200703;#11224600;#11557789;#11699413;#15748964;#11120335	+
BCL2	ENSG00000171791	151400	Skin-diseases	cutaneous-lesions;cutaneous-follicular-lymphoma;extranodal-lymphomas;papule;plaque;tumors;erythema	DERMATOLOGIC	11557789;11224600	-
BCL2	ENSG00000171791	151400	Splenomegaly	splenic-involvement	MISCELLANEOUS	11120335;15748964;10733261;11557789	-
BCL2	ENSG00000171791	151400	Thrombocytopenia	autoimmune	HEMATOLOGIC	10561025	-
BCS1L	ENSG00000074582	124000	Acid-base-imbalance	-	METABOLIC	#11528392;#12910490	+
BCS1L	ENSG00000074582	124000	Acidosis	lactic-acidosis;ketosis;hyperlactatemia	METABOLIC	11528392;12910490	-
BCS1L	ENSG00000074582	124000	Alkaline-phosphatase-abnormal	elevated	MISCELLANEOUS	12910490	-
BCS1L	ENSG00000074582	124000	Aminoacid-levels-abnormal	elevated-tyrosine;elevated-alanine;hypoaminoacidemia;De-Toni-Fanconi-Debre-syndrome	METABOLIC	11528392;12910490	-
BCS1L	ENSG00000074582	124000	Aminoaciduria	De-Toni-Fanconi-Debre-syndrome	METABOLIC	11528392;12910490	-
BCS1L	ENSG00000074582	124000	Biliary-tract-diseases	-	GASTROINTESTINAL	#12910490;#11528392	+
BCS1L	ENSG00000074582	124000	Blepharoptosis	ptosis	OPHTHALMOLOGIC	12910490	-
BCS1L	ENSG00000074582	124000	Blood-coagulation-disorders	coagulation-dysfunction	HEMATOLOGIC	12910490	-
BCS1L	ENSG00000074582	124000	Blood-protein-disorders	hypoproteinemia	HEMATOLOGIC	11528392;12910490	-
BCS1L	ENSG00000074582	124000	Brain-diseases	-	NEUROLOGIC	#12910490;#11528392	+
BCS1L	ENSG00000074582	124000	Central-nervous-system-diseases	-	NEUROLOGIC	#12910490;#11528392	+
BCS1L	ENSG00000074582	124000	Cerebellar-atrophy	cerebellar-atrophy	NEUROLOGIC	12910490	-
BCS1L	ENSG00000074582	124000	Cerebral-atrophy	MRI-findings;considerable-atrophy;cerebral-atrophy	NEUROLOGIC	11528392	-
BCS1L	ENSG00000074582	124000	Cerebral-necrosis	white-matter-necrosis;cortex-necrosis;Leigh-like	NEUROLOGIC	11528392;12910490	-
BCS1L	ENSG00000074582	124000	Cholangitis	cholangiolitis;proliferation-with-cholangiolitis	GASTROINTESTINAL	12910490	-
BCS1L	ENSG00000074582	124000	Cholestasis	intrahepatic-cholestasis;canalicular-cholestasis	GASTROINTESTINAL	11528392;12910490	-
BCS1L	ENSG00000074582	124000	Craniofacial-abnormalities	-	MUSCULOSKELETAL	#11528392	+
BCS1L	ENSG00000074582	124000	Creatine-kinase-abnormal	increase-in-creatine-kinase	MISCELLANEOUS	11528392	-
BCS1L	ENSG00000074582	124000	Creatine-levels-abnormal	-	METABOLIC	11528392	-
BCS1L	ENSG00000074582	124000	Dehydration	De-Toni-Fanconi-Debre-syndrome	METABOLIC	12910490	-
BCS1L	ENSG00000074582	124000	Developmental-delay	psychomotor-retardation;multisystemic-involvement	NEUROLOGIC	11528392;12910490	-
BCS1L	ENSG00000074582	124000	Digestive-system-diseases	-	GASTROINTESTINAL	#12910490;#11528392	+
BCS1L	ENSG00000074582	124000	Encephalopathy	encephalomyelopathy;Leigh-like	NEUROLOGIC	11528392;12910490	-
BCS1L	ENSG00000074582	124000	Eye-diseases	-	OPHTHALMOLOGIC	#12910490;#11528392	+
BCS1L	ENSG00000074582	124000	Failure-to-thrive	severe	MISCELLANEOUS	12910490	-
BCS1L	ENSG00000074582	124000	Fatty-liver	steatosis;fibrosis;microvesicular-fat-droplets;periportal-necrosis	GASTROINTESTINAL	12910490	-
BCS1L	ENSG00000074582	124000	Feeding-difficulties	-	GASTROINTESTINAL	11528392	-
BCS1L	ENSG00000074582	124000	Gastroenteritis	viral	GASTROINTESTINAL	12910490	-
BCS1L	ENSG00000074582	124000	Gastrointestinal-diseases	meconium-abnormal;green-in-a-white-envelope	GASTROINTESTINAL	12910490;#11528392	-
BCS1L	ENSG00000074582	124000	Gastrointestinal-hemorrhage	gastric-hemorrhage;hemorrhagic-lesions	GASTROINTESTINAL	11528392;12910490	-
BCS1L	ENSG00000074582	124000	Genitourinary-diseases	-	GENITOURINARY	#11528392;#12910490	+
BCS1L	ENSG00000074582	124000	Glucose-metabolism-disorders	-	METABOLIC	#11528392;#12910490	+
BCS1L	ENSG00000074582	124000	Glycosuria	De-Toni-Fanconi-Debre-syndrome;glucose-increase-in-urine	METABOLIC	11528392;12910490	-
BCS1L	ENSG00000074582	124000	Growth-disorders	-	MISCELLANEOUS	#12910490	+
BCS1L	ENSG00000074582	124000	Hearing-disorders	hearing-loss;sensorineural	NEUROLOGIC	11528392	-
BCS1L	ENSG00000074582	124000	Hematologic-diseases	-	HEMATOLOGIC	#12910490;#11528392	+
BCS1L	ENSG00000074582	124000	Hemochromatosis	hemosiderosis;liver;hepatosiderosis;aggregates-of-macrophages;Kupffer-cells	METABOLIC	12910490	-
BCS1L	ENSG00000074582	124000	Hyperglycerolemia	glyceroluria	METABOLIC	12910490	-
BCS1L	ENSG00000074582	124000	Hyperreflexia	brisk;deep-tendon-reflexes-abnormal	NEUROLOGIC	11528392	-
BCS1L	ENSG00000074582	124000	Hypoglycemia	De-Toni-Fanconi-Debre-syndrome	METABOLIC	11528392;12910490	-
BCS1L	ENSG00000074582	124000	Hypokalemia	De-Toni-Fanconi-Debre-syndrome;potassium-levels-decreased	METABOLIC	12910490	-
BCS1L	ENSG00000074582	124000	Hyponatremia	De-Toni-Fanconi-Debre-syndrome	METABOLIC	12910490	-
BCS1L	ENSG00000074582	124000	Hypophosphatemia	De-Toni-Fanconi-Debre-syndrome	METABOLIC	12910490	-
BCS1L	ENSG00000074582	124000	Ketosis	ketosis;elevated-3-0H-butyrate;acetone-in-urine	METABOLIC	12910490	-
BCS1L	ENSG00000074582	124000	Kidney-diseases	-	GENITOURINARY	#11528392;#12910490	+
BCS1L	ENSG00000074582	124000	Leukoencephalopathy	leukodystrophy	NEUROLOGIC	11528392	-
BCS1L	ENSG00000074582	124000	Liver-diseases	hepatic-failure;hepatic-coma;liver-dysfunction	GASTROINTESTINAL	11528392;12910490	-
BCS1L	ENSG00000074582	124000	Liver-enzymes-abnormal	ALT-elevated;AST-elevated;GGT-elevated	GASTROINTESTINAL	11528392;12910490	-
BCS1L	ENSG00000074582	124000	Mental-retardation	-	NEUROLOGIC	11528392	-
BCS1L	ENSG00000074582	124000	Metabolic-diseases	-	METABOLIC	#11528392;#12910490	+
BCS1L	ENSG00000074582	124000	Microcephaly	-	MUSCULOSKELETAL	11528392	-
BCS1L	ENSG00000074582	124000	Mitochondria-abnormal	enlarged;cristae-abnormal;christae-reduced;fluffy-matrix;inclusions	MISCELLANEOUS	12910490	-
BCS1L	ENSG00000074582	124000	Muscle-hypotonia	axial-hypotonia	NEUROLOGIC	11528392;12910490	-
BCS1L	ENSG00000074582	124000	Muscular-diseases	-	MUSCULOSKELETAL	#11528392	+
BCS1L	ENSG00000074582	124000	Musculoskeletal-diseases	-	MUSCULOSKELETAL	#11528392	+
BCS1L	ENSG00000074582	124000	Myoglobinuria	-	MUSCULOSKELETAL	11528392	-
BCS1L	ENSG00000074582	124000	Nephritis	tubulointerstitial-nephritis	GENITOURINARY	11528392	-
BCS1L	ENSG00000074582	124000	Nervous-system-diseases	-	NEUROLOGIC	#12910490;#11528392	+
BCS1L	ENSG00000074582	124000	Neurobehavioral-manifestations	-	NEUROLOGIC	#11528392	+
BCS1L	ENSG00000074582	124000	Neurologic-manifestations	-	NEUROLOGIC	#11528392;#12910490	+
BCS1L	ENSG00000074582	124000	Neuromuscular-manifestations	-	NEUROLOGIC	#11528392;#12910490	+
BCS1L	ENSG00000074582	124000	Neuronal-loss-and-lesions	MRI-findings;bilateral-symmetric;brainstem-abnormal;basal-ganglia-abnormal;lesions;myelination-abnormal;necrosis;spongiosis;capillary-proliferation;Leigh-like	NEUROLOGIC	12910490	-
BCS1L	ENSG00000074582	124000	Organic-acids-abnormal	lactic-aciduria;glyceroluria;elevated-tricarboxylic-acid-cycle-intermediates;fumaric-aciduria;acetone-elevated	METABOLIC	11528392;12910490	-
BCS1L	ENSG00000074582	124000	Phosphorus-metabolism-disorders	-	METABOLIC	#12910490	+
BCS1L	ENSG00000074582	124000	RCCIII-deficiency	liver;muscle	MISCELLANEOUS	11528392;12910490	-
BCS1L	ENSG00000074582	124000	Reflexes-abnormal	-	NEUROLOGIC	#11528392	+
BCS1L	ENSG00000074582	124000	Renal-insufficiency	proximal-tubulopathy;De-Toni-Fanconi-Debre-syndrome;renal-tubulopathy	GENITOURINARY	11528392;12910490	-
BCS1L	ENSG00000074582	124000	Respiration-disorders	episodes-of-apnea;apnea	RESPIRATORY	11528392	-
BCS1L	ENSG00000074582	124000	Respiratory-tract-diseases	-	RESPIRATORY	#11528392	+
BCS1L	ENSG00000074582	124000	Spinal-cord-diseases	encephalomyelopathy;myelopathy;Leigh-like	NEUROLOGIC	11528392	-
BCS1L	ENSG00000074582	124000	TCA-intermediates-elevated	accumulation-of-krebs-cycle-intermediates-in-urine	METABOLIC	11528392;12910490	-
BCS1L	ENSG00000074582	124000	Urologic-diseases	-	GENITOURINARY	#11528392;#12910490	+
BCS1L	ENSG00000074582	124000	Vision-disorders	blindness	OPHTHALMOLOGIC	11528392	-
BCS1L	ENSG00000074582	124000	Vomiting	-	GASTROINTESTINAL	11528392	-
BCS1L	ENSG00000074582	124000	Water-electrolyte-imbalance	-	METABOLIC	#12910490	+
BCS1L	ENSG00000074582	603358	Acid-base-imbalance	-	METABOLIC	#7577396;#9482441;#12215968;#12027811	+
BCS1L	ENSG00000074582	603358	Acidosis	lactic-acidosis;metabolic-acidosis	METABOLIC	7577396;9482441;12215968;12027811	-
BCS1L	ENSG00000074582	603358	Aminoacid-levels-abnormal	hypoaminoacidemia;De-Toni-Fanconi-Debre-syndrome;alanine-elevated	METABOLIC	7577396;9482441	-
BCS1L	ENSG00000074582	603358	Aminoaciduria	nonspecific-aminoaciduria	METABOLIC	7577396;9482441;12215968;12027811	-
BCS1L	ENSG00000074582	603358	Biliary-tract-diseases	-	GASTROINTESTINAL	#9482441;#12215968;#12027811	+
BCS1L	ENSG00000074582	603358	Blood-protein-disorders	serum-haptoglobin-levels-decreased	HEMATOLOGIC	9482441	-
BCS1L	ENSG00000074582	603358	Brain-diseases	-	NEUROLOGIC	#7577396;#12215968	+
BCS1L	ENSG00000074582	603358	Cardiorespiratory-arrest	early-death	CARDIOVASCULAR	12215968;12027811	-
BCS1L	ENSG00000074582	603358	Cardiovascular-diseases	-	CARDIOVASCULAR	#12215968;#12027811	+
BCS1L	ENSG00000074582	603358	Carnitine-levels-abnormal	De-Toni-Fanconi-Debre-syndrome;serum-free-carnitine-concentration-decreased	METABOLIC	9482441	-
BCS1L	ENSG00000074582	603358	Central-nervous-system-diseases	-	NEUROLOGIC	#7577396;#12215968	+
BCS1L	ENSG00000074582	603358	Cerebral-necrosis	white-matter-abnormal;vermis-abnormal;cerebellum-abnormal;cerebral-necrosis	NEUROLOGIC	7577396	-
BCS1L	ENSG00000074582	603358	Cerebrovascular-disorders	-	NEUROLOGIC	#7577396	+
BCS1L	ENSG00000074582	603358	Ceruloplasmin-levels-abnormal	decreased;serum;caeruloplasmin-decreased	MISCELLANEOUS	9482441	-
BCS1L	ENSG00000074582	603358	Cholestasis	intrahepatic	GASTROINTESTINAL	9482441;12215968;12027811	-
BCS1L	ENSG00000074582	603358	Craniofacial-abnormalities	-	MUSCULOSKELETAL	#7577396	+
BCS1L	ENSG00000074582	603358	Creatinine-levels-abnormal	-	GENITOURINARY	7577396	-
BCS1L	ENSG00000074582	603358	Cystic-kidney-diseases	Pathology-findings;multicystic-kidneys	GENITOURINARY	7577396	-
BCS1L	ENSG00000074582	603358	Developmental-delay	psychomotor-retardation;severe	NEUROLOGIC	7577396	-
BCS1L	ENSG00000074582	603358	Digestive-system-diseases	-	GASTROINTESTINAL	#9482441;#12215968;#12027811;#7577396	+
BCS1L	ENSG00000074582	603358	Dystonic-disorders	dystonic;involuntary-movements	NEUROLOGIC	7577396	-
BCS1L	ENSG00000074582	603358	Fatty-liver	steatosis;fibrosis;inflammation;portal-inflammatory-cells;bile-ductular-proliferation	GASTROINTESTINAL	7577396;9482441	-
BCS1L	ENSG00000074582	603358	Gastroenteritis	hemorrhagic-enteritis	GASTROINTESTINAL	7577396	-
BCS1L	ENSG00000074582	603358	Gastrointestinal-diseases	-	GASTROINTESTINAL	#7577396	+
BCS1L	ENSG00000074582	603358	Genitourinary-diseases	-	GENITOURINARY	#7577396;#9482441;#12215968	+
BCS1L	ENSG00000074582	603358	Glucose-metabolism-disorders	-	METABOLIC	#7577396;#9482441	+
BCS1L	ENSG00000074582	603358	Glycosuria	-	METABOLIC	7577396;9482441	-
BCS1L	ENSG00000074582	603358	Growth-deficiency	intrauterine-growth-retardation;fetal-growth-retardation	MISCELLANEOUS	7577396;9482441;12215968;12027811	-
BCS1L	ENSG00000074582	603358	Growth-disorders	-	MISCELLANEOUS	#7577396;#9482441;#12215968;#12027811	+
BCS1L	ENSG00000074582	603358	Hematologic-diseases	-	HEMATOLOGIC	#9482441	+
BCS1L	ENSG00000074582	603358	Hemochromatosis	iron-overload;hemosiderosis;liver;transferrin-abnormal	METABOLIC	9482441;12215968;12027811	-
BCS1L	ENSG00000074582	603358	Hyperbilirubinemia	-	METABOLIC	7577396;9482441	-
BCS1L	ENSG00000074582	603358	Hyperventilation	hyperpnea	RESPIRATORY	7577396	-
BCS1L	ENSG00000074582	603358	Hypoglycemia	hypoglycaemic	METABOLIC	7577396;9482441	-
BCS1L	ENSG00000074582	603358	Hypokalemia	potassium-levels-decreased	METABOLIC	7577396;9482441	-
BCS1L	ENSG00000074582	603358	Hyponatremia	De-Toni-Fanconi-Debre-syndrome	METABOLIC	7577396	-
BCS1L	ENSG00000074582	603358	Hypophosphatemia	-	METABOLIC	7577396;9482441	-
BCS1L	ENSG00000074582	603358	Immune-system-diseases	-	IMMUNOLOGIC	#7577396	+
BCS1L	ENSG00000074582	603358	Infections	bacterial-infections;sepsis	IMMUNOLOGIC	7577396	-
BCS1L	ENSG00000074582	603358	Intracranial-hemorrhages	intracranial-haemorrhage	NEUROLOGIC	7577396	-
BCS1L	ENSG00000074582	603358	Ketosis	hydroxybutyrate-elevated;acetoacetate-elevated	METABOLIC	9482441	-
BCS1L	ENSG00000074582	603358	Kidney-diseases	-	GENITOURINARY	#7577396;#9482441;#12215968	+
BCS1L	ENSG00000074582	603358	Liver-cirrhosis	progressive;cirrhosis	GASTROINTESTINAL	9482441	-
BCS1L	ENSG00000074582	603358	Liver-diseases	hepatic-failure;hepatic-coma;hepatic-dysfunction;sinusoidal-Kupffer-cells;paucity-of-intrahepatic-small-bileducts	GASTROINTESTINAL	7577396;9482441	-
BCS1L	ENSG00000074582	603358	Liver-enzymes-abnormal	transaminases-abnormal;elevated-transaminases;ALT-elevated;AST-elevated	GASTROINTESTINAL	7577396	-
BCS1L	ENSG00000074582	603358	Lung-diseases	-	RESPIRATORY	#7577396	+
BCS1L	ENSG00000074582	603358	Metabolic-diseases	-	METABOLIC	#7577396;#9482441;#12215968;#12027811	+
BCS1L	ENSG00000074582	603358	Microcephaly	-	MUSCULOSKELETAL	7577396	-
BCS1L	ENSG00000074582	603358	Movement-disorders	-	NEUROLOGIC	#7577396	+
BCS1L	ENSG00000074582	603358	Muscle-hypotonia	-	NEUROLOGIC	7577396;12215968	-
BCS1L	ENSG00000074582	603358	Musculoskeletal-diseases	-	MUSCULOSKELETAL	#7577396	+
BCS1L	ENSG00000074582	603358	Nephrocalcinosis	calcium-containing-concrements;renal-medullae	GENITOURINARY	9482441	-
BCS1L	ENSG00000074582	603358	Nervous-system-diseases	-	NEUROLOGIC	#7577396;#12215968	+
BCS1L	ENSG00000074582	603358	Neurologic-manifestations	-	NEUROLOGIC	#7577396;#12215968	+
BCS1L	ENSG00000074582	603358	Neuromuscular-manifestations	-	NEUROLOGIC	#7577396;#12215968	+
BCS1L	ENSG00000074582	603358	Neuronal-loss-and-lesions	Pathology-findings;dentate-abnormal;olivary-nuclei-abnormal	NEUROLOGIC	7577396	-
BCS1L	ENSG00000074582	603358	Organic-acids-abnormal	lactic-aciduria;increased-excretion-of-lactate;increased-excretion-of-hydroxyphenyl-lactate;increased-excretion-of-pyruvate;elevated-tricarboxylic-acid-cycle-intermediates	METABOLIC	7577396;9482441;12027811	-
BCS1L	ENSG00000074582	603358	Phosphorus-metabolism-disorders	-	METABOLIC	#7577396;#9482441	+
BCS1L	ENSG00000074582	603358	Pulmonary-hemorrhage	pulmonary-haemorrhage	RESPIRATORY	7577396	-
BCS1L	ENSG00000074582	603358	RCCIII-deficiency	muscle;variable	MISCELLANEOUS	7577396	-
BCS1L	ENSG00000074582	603358	Renal-insufficiency	renal-tubular-dysfunction;renal-tubular-acidosis;De-Toni-Fanconi-Debre-syndrome;bicarbonate-loss	GENITOURINARY	7577396;9482441;12215968	-
BCS1L	ENSG00000074582	603358	Respiration-disorders	episodes-of-apnea;apnea;dyspnea	RESPIRATORY	7577396	-
BCS1L	ENSG00000074582	603358	Respiratory-tract-diseases	-	RESPIRATORY	#7577396	+
BCS1L	ENSG00000074582	603358	Seizures	-	NEUROLOGIC	7577396;12215968	-
BCS1L	ENSG00000074582	603358	Urologic-diseases	-	GENITOURINARY	#7577396;#9482441;#12215968	+
BCS1L	ENSG00000074582	603358	Water-electrolyte-imbalance	-	METABOLIC	#7577396;#9482441	+
CASP8	ENSG00000064012	114500	Colorectal-neoplasms	colon-carcinomas;colorectal-carcinomas;carcinogenesis	ONCOLOGIC	12949717	-
CASP8	ENSG00000064012	114500	Digestive-system-neoplasms	-	ONCOLOGIC	#12949717	+
CASP8	ENSG00000064012	114500	Neoplasms	-	ONCOLOGIC	#12949717	+
CASP8	ENSG00000064012	114550	Digestive-system-neoplasms	-	ONCOLOGIC	#15531912	+
CASP8	ENSG00000064012	114550	Hepatocellular-carcinoma	hepatocellular-cancer;HCC	ONCOLOGIC	15531912	-
CASP8	ENSG00000064012	114550	Neoplasms	-	ONCOLOGIC	#15531912	+
CASP8	ENSG00000064012	607271	Anemia	-	HEMATOLOGIC	15492869	-
CASP8	ENSG00000064012	607271	Asthma	asthma;reactive-airways-diseases	RESPIRATORY	12353035	-
CASP8	ENSG00000064012	607271	Blood-platelet-disorders	-	HEMATOLOGIC	#15492869	+
CASP8	ENSG00000064012	607271	Blood-protein-disorders	-	HEMATOLOGIC	#12353035	+
CASP8	ENSG00000064012	607271	Body-temperature-changes	-	MISCELLANEOUS	#15492869	+
CASP8	ENSG00000064012	607271	Bone-marrow-diseases	erythroid-hyperplasia	HEMATOLOGIC	15492869	-
CASP8	ENSG00000064012	607271	Bronchial-diseases	-	RESPIRATORY	#12353035	+
CASP8	ENSG00000064012	607271	Dermatitis	eczema	DERMATOLOGIC	12353035	-
CASP8	ENSG00000064012	607271	Diarrhea	chronic-diarrhea	GASTROINTESTINAL	12353035	-
CASP8	ENSG00000064012	607271	Digestive-system-diseases	-	GASTROINTESTINAL	#12353035;#15492869	+
CASP8	ENSG00000064012	607271	Dysgammaglobulinemia	IGG-decreased;IGM-decreased;T-cell-dysfunction	HEMATOLOGIC	12353035	-
CASP8	ENSG00000064012	607271	Failure-to-thrive	-	MISCELLANEOUS	12353035	-
CASP8	ENSG00000064012	607271	Fever	pyretic	MISCELLANEOUS	15492869	-
CASP8	ENSG00000064012	607271	Growth-deficiency	short-stature	MISCELLANEOUS	12353035	-
CASP8	ENSG00000064012	607271	Growth-disorders	-	MISCELLANEOUS	#12353035	+
CASP8	ENSG00000064012	607271	Hematologic-diseases	-	HEMATOLOGIC	#15492869;#12353035	+
CASP8	ENSG00000064012	607271	Hepatomegaly	liver-enlarged	GASTROINTESTINAL	15492869	-
CASP8	ENSG00000064012	607271	Immune-deficiency	defective-lymphocyte-apoptosis;autoimmunity;immunodeficiency;chronic-infections;recurrent-infections;sinopulmonary-infections;herpes-simplex-infections	IMMUNOLOGIC	12353035;15492869	-
CASP8	ENSG00000064012	607271	Immune-system-diseases	-	IMMUNOLOGIC	#12353035;#15492869	+
CASP8	ENSG00000064012	607271	Infections	recurrent;mucocutaneous-infections;viral-infections;sinopulmonary-infections;herpes-simplex-infections;opportunistic-infections	IMMUNOLOGIC	12353035;15492869	-
CASP8	ENSG00000064012	607271	Leukocyte-disorders	-	HEMATOLOGIC	#15492869	+
CASP8	ENSG00000064012	607271	Leukopenia	-	HEMATOLOGIC	15492869	-
CASP8	ENSG00000064012	607271	Liver-diseases	-	GASTROINTESTINAL	#15492869	+
CASP8	ENSG00000064012	607271	Lung-diseases	-	RESPIRATORY	#12353035	+
CASP8	ENSG00000064012	607271	Lymphatic-diseases	lymphadenopathy;chronic;noninfectious;lymph-nodes-enlarged;lymphoproliferative-disorder	HEMATOLOGIC	12353035;15492869	-
CASP8	ENSG00000064012	607271	Pneumonia	-	RESPIRATORY	12353035	-
CASP8	ENSG00000064012	607271	Respiratory-tract-diseases	-	RESPIRATORY	#12353035	+
CASP8	ENSG00000064012	607271	Skin-diseases	-	DERMATOLOGIC	#12353035	+
CASP8	ENSG00000064012	607271	Splenomegaly	splen-enlarged	MISCELLANEOUS	12353035;15492869	-
CASP8	ENSG00000064012	607271	Thrombocytopenia	-	HEMATOLOGIC	15492869	-
CLN3	ENSG00000188603	204200	Aggression	aggressive-bursts;aggressive-behaviour;low-frustration-tolerance;aggressiveness	PSYCHIATRIC	9392580;15634309	-
CLN3	ENSG00000188603	204200	Anxiety-disorders	anxiety;fears	PSYCHIATRIC	11588990;15634309	-
CLN3	ENSG00000188603	204200	Ataxia	truncal-ataxia	NEUROLOGIC	9392580	-
CLN3	ENSG00000188603	204200	Behavioral-symptoms	behavioral-problems;psychiatric-disturbance;psychiatric-symptoms;attention-problems	PSYCHIATRIC	9392580;15634309	-
CLN3	ENSG00000188603	204200	Brain-diseases	-	NEUROLOGIC	#7553855;#9392580;#9450775;#10720276;#15032383;#10964839;#12363103;#16087292;#9311735	+
CLN3	ENSG00000188603	204200	Central-nervous-system-diseases	-	NEUROLOGIC	#7553855;#9392580;#9450775;#10720276;#15032383;#10964839;#16087292;#12363103;#9311735	+
CLN3	ENSG00000188603	204200	Cerebellar-atrophy	cerebellar-atrophy	NEUROLOGIC	7553855;9392580	-
CLN3	ENSG00000188603	204200	Cerebral-atrophy	cortical-atrophy;central-atrophy;brain-atrophy;mild-to-moderate-cerebral-atrophy;enlarged-ventricles;global-cerebral-atrophy	NEUROLOGIC	7553855;9450775;10720276;9392580;15032383	-
CLN3	ENSG00000188603	204200	Confusion	episodes-of-confusion;disorientation	NEUROLOGIC	9450775	-
CLN3	ENSG00000188603	204200	Cortical-dysplasia	markedly-narrow-gyri;brain-autopsy-findings	NEUROLOGIC	10964839	-
CLN3	ENSG00000188603	204200	Craniofacial-abnormalities	-	MUSCULOSKELETAL	#15032383	+
CLN3	ENSG00000188603	204200	Dementia	cognitive-decline	PSYCHIATRIC	9311735;10964839;16087292	-
CLN3	ENSG00000188603	204200	Depressive-disorder	depressive-behavior;depressive-symptoms	PSYCHIATRIC	9392580;15634309;11588990	-
CLN3	ENSG00000188603	204200	Developmental-delay	psychomotor-retardation;regression;psychomotor-detorioration	NEUROLOGIC	7553855;9311735;9392580;15032383	-
CLN3	ENSG00000188603	204200	Dysarthria	speech-retardation;dysarthric	NEUROLOGIC	9311735;9450775;15634309	-
CLN3	ENSG00000188603	204200	Dystonic-disorders	oromandibular-dystonia	NEUROLOGIC	9450775	-
CLN3	ENSG00000188603	204200	Electroencephalogram-abnormal	excess-of-slower-theta-activity;multifocal-epileptiform-discharges;generalized-epileptiform-discharges;discontinuous-background	NEUROLOGIC	9450775;12363103;15032383;16087292	-
CLN3	ENSG00000188603	204200	Electroretinography-abnormal	ERG-abnormal;abolished-electroretinogram;scotopic-responses-diminished;photopic-responses-diminished;nonrecordable-ERG	OPHTHALMOLOGIC	9392580;15032383;10964839	-
CLN3	ENSG00000188603	204200	Endocrine-system-diseases	-	ENDOCRINOLOGIC	#12374586	+
CLN3	ENSG00000188603	204200	Extrapyramidal-tract-signs	movement-disorder	NEUROLOGIC	10720276;9392580	-
CLN3	ENSG00000188603	204200	Eye-diseases	-	OPHTHALMOLOGIC	#9392580;#15032383;#10964839;#9311735;#9450775;#12363103;#7553855;#15634309;#16087292	+
CLN3	ENSG00000188603	204200	Female-genital-diseases	-	GENITOURINARY	#12374586	+
CLN3	ENSG00000188603	204200	Gait-disorders	gait-abnormalities	NEUROLOGIC	7553855;9450775	-
CLN3	ENSG00000188603	204200	Genitourinary-diseases	-	GENITOURINARY	#12374586	+
CLN3	ENSG00000188603	204200	Gonadal-disorders	-	ENDOCRINOLOGIC	#12374586	+
CLN3	ENSG00000188603	204200	Hair-diseases	-	DERMATOLOGIC	#12374586	+
CLN3	ENSG00000188603	204200	Hallucinations	visual-hallucinations;delusions	NEUROLOGIC	9392580;15634309;16087292	-
CLN3	ENSG00000188603	204200	Hematologic-diseases	-	HEMATOLOGIC	#7553855;#9311735;#9392580	+
CLN3	ENSG00000188603	204200	Hirsutism	related-to-hyperandrogenism	DERMATOLOGIC	12374586	-
CLN3	ENSG00000188603	204200	Hyperandrogenism	hyperandrogenaemia;acne-and-hirsutism	ENDOCRINOLOGIC	12374586	-
CLN3	ENSG00000188603	204200	Hyporeflexia	hypoactive-reflexes	NEUROLOGIC	15032383	-
CLN3	ENSG00000188603	204200	Leukocyte-disorders	-	HEMATOLOGIC	#7553855;#9311735;#9392580	+
CLN3	ENSG00000188603	204200	Lung-diseases	-	RESPIRATORY	#9450775;#10964839	+
CLN3	ENSG00000188603	204200	Lymphocytes-abnormal	vacuolated-lymphocytes	HEMATOLOGIC	7553855;9311735;9392580	-
CLN3	ENSG00000188603	204200	Macular-degeneration	macular-lesions;bulls-eye-macular-lesions;black-pigment-around-the-macula;maculopathy	OPHTHALMOLOGIC	9392580;10964839	-
CLN3	ENSG00000188603	204200	Memory-disorders	memory-loss;impairment-of-short-term-memory;impairment-of-long-term-memory	NEUROLOGIC	9450775	-
CLN3	ENSG00000188603	204200	Menstruation-disturbances	irregular-cycles;prolonged-cycles;short-mean-ovarian-cycles;signs-of-anovulation;early-menarche	GENITOURINARY	12374586	-
CLN3	ENSG00000188603	204200	Mental-disorders	-	PSYCHIATRIC	#11588990;#15634309;#9311735;#10964839;#16087292;#9392580	+
CLN3	ENSG00000188603	204200	Mental-retardation	mentally-retarded;mental-decline;mental-deterioration;IQ-decline	NEUROLOGIC	7553855;9311735;9392580;15634309	-
CLN3	ENSG00000188603	204200	Metabolic-diseases	-	METABOLIC	#12374586	+
CLN3	ENSG00000188603	204200	Microcephaly	microcephalic	MUSCULOSKELETAL	15032383	-
CLN3	ENSG00000188603	204200	Mood-disorders	rapid-changes-of-mood	PSYCHIATRIC	15634309;#9392580;#11588990	-
CLN3	ENSG00000188603	204200	Movement-disorders	involuntary-movements;incoordination	NEUROLOGIC	16087292;#9450775;#12363103;#10720276;#9392580	-
CLN3	ENSG00000188603	204200	Muscle-hypotonia	slight;severe-head-lag	NEUROLOGIC	7553855;15032383	-
CLN3	ENSG00000188603	204200	Muscle-spasticity	-	NEUROLOGIC	10720276	-
CLN3	ENSG00000188603	204200	Musculoskeletal-diseases	-	MUSCULOSKELETAL	#15032383	+
CLN3	ENSG00000188603	204200	Myoclonus	myoclonia	NEUROLOGIC	12363103	-
CLN3	ENSG00000188603	204200	Nervous-system-diseases	-	NEUROLOGIC	#9392580;#7553855;#9450775;#10720276;#15032383;#10964839;#9311735;#15634309;#16087292;#12363103	+
CLN3	ENSG00000188603	204200	Neurobehavioral-manifestations	-	NEUROLOGIC	#9450775;#9392580;#15634309;#16087292;#9311735;#7553855	+
CLN3	ENSG00000188603	204200	Neurodegenerative-diseases	neurodegenerative-disorder	NEUROLOGIC	7553855;9392580;15634309;10964839;16087292	-
CLN3	ENSG00000188603	204200	Neurologic-manifestations	-	NEUROLOGIC	#9392580;#9450775;#15634309;#16087292;#9311735;#7553855;#15032383;#10720276;#12363103	+
CLN3	ENSG00000188603	204200	Neuromuscular-manifestations	-	NEUROLOGIC	#7553855;#15032383;#10720276	+
CLN3	ENSG00000188603	204200	Neuronal-lipopigments	autofluorescent;ceroid;lipofuscin-like-lipopigments;autofluorescent-lipopigment-granules;faint-yellowish-granules	NEUROLOGIC	7553855;9311735;9392580;10964839;16087292	-
CLN3	ENSG00000188603	204200	Neuronal-loss-and-lesions	MRI-findings;signal-intensity-abnormalities;cortical-atrophy;central-atrophy;cerebellar-atrophy;striatum-abnormal;white-matter-abnormal;periventricular-white-matter-abnormal;myelination-impaired	NEUROLOGIC	7553855;12363103;10720276;9392580;15032383;16087292	-
CLN3	ENSG00000188603	204200	Obesity	associated-with-juvenile-neuronal-ceroid-lipofuscinosis	METABOLIC	12374586	-
CLN3	ENSG00000188603	204200	Ocular-motility-disorders	-	OPHTHALMOLOGIC	#9450775;#15032383	+
CLN3	ENSG00000188603	204200	Optic-nerve-diseases	optic-atrophy;pale-optic-disc;peripapillary-atrophy	OPHTHALMOLOGIC	9450775;12363103;9392580;10964839	-
CLN3	ENSG00000188603	204200	Ovarian-diseases	polycystic-ovaries	GENITOURINARY	12374586	-
CLN3	ENSG00000188603	204200	Parkinsonian-disorders	parkinsonism;parkinsonian-signs	NEUROLOGIC	12363103;10720276;9392580	-
CLN3	ENSG00000188603	204200	Pathologic-nystagmus	pendular-nystagmus;jiggling-of-the-eyes	OPHTHALMOLOGIC	9450775;15032383	-
CLN3	ENSG00000188603	204200	Perceptual-disorders	-	NEUROLOGIC	#9392580;#15634309;#16087292	+
CLN3	ENSG00000188603	204200	Peripheral-nervous-system-diseases	-	NEUROLOGIC	#9450775	+
CLN3	ENSG00000188603	204200	Photophobia	photophobic	OPHTHALMOLOGIC	10964839	-
CLN3	ENSG00000188603	204200	Pneumonia	aspiration-pneumonia;sepsis	RESPIRATORY	9450775;10964839	-
CLN3	ENSG00000188603	204200	Proprioception-impaired	vibratory-loss;position-loss	NEUROLOGIC	9450775	-
CLN3	ENSG00000188603	204200	Psychiatric-disorders	-	PSYCHIATRIC	#9392580;#15634309;#11588990;#9311735;#10964839;#16087292	+
CLN3	ENSG00000188603	204200	Psychomotor-agitation	hyperkinetic;limited-attention-span	NEUROLOGIC	15634309	-
CLN3	ENSG00000188603	204200	Psychotic-disorders	psychotic-disorder;psychotic-symptoms;psychotic-like-symptoms	PSYCHIATRIC	11588990;9392580;15634309	-
CLN3	ENSG00000188603	204200	Reflexes-abnormal	-	NEUROLOGIC	#15032383	+
CLN3	ENSG00000188603	204200	Respiratory-tract-diseases	-	RESPIRATORY	#9450775;#10964839	+
CLN3	ENSG00000188603	204200	Retinal-diseases	retinitis-pigmentosa;retinal-dystrophy;retinal-atrophy;pigment-aggregations;mottling-of-the-retinal-pigment-epithelium;attenuation-of-the-retinal-arterioles;retinal-degeneration;choriocapillaris-reduced	OPHTHALMOLOGIC	9311735;9450775;9392580;15032383;10964839	-
CLN3	ENSG00000188603	204200	Schizophrenia-and-psychotic-disorders	-	PSYCHIATRIC	#11588990;#9392580;#15634309	+
CLN3	ENSG00000188603	204200	Seizures	epileptic-seizures;epilepsy;tonic-clonic-seizures;generalized-seizures	NEUROLOGIC	7553855;9311735;9450775;12363103;9392580;15032383;10964839;16087292	-
CLN3	ENSG00000188603	204200	Sex-differentiation-disorders	-	ENDOCRINOLOGIC	#12374586	+
CLN3	ENSG00000188603	204200	Skin-diseases	acne	DERMATOLOGIC	12374586	-
CLN3	ENSG00000188603	204200	Sleep-disorders	sleep-disturbances;disturbed-biological-rhythm	NEUROLOGIC	15634309	-
CLN3	ENSG00000188603	204200	Speech-disorders	loss-of-speech;speech-failure;speech-problems;restless-speaking;speech-difficulties;comprehension-difficulties	NEUROLOGIC	9392580;15634309;16087292;#9311735;#9450775	-
CLN3	ENSG00000188603	204200	Vision-disorders	blindness;progressive-vision-loss;visual-evoked-potential-abnormal;visual-failure;poor-vision	OPHTHALMOLOGIC	7553855;9311735;9450775;9392580;15634309;15032383;10964839;16087292	-
COX10	ENSG00000006695	220110	Acid-base-imbalance	-	METABOLIC	#10767350;#12928484;#15455402;#2834526	+
COX10	ENSG00000006695	220110	Acidosis	lactic-acidosis;CSF-lactic-acidosis;metabolic-acidosis	METABOLIC	10767350;12928484;15455402;2834526	-
COX10	ENSG00000006695	220110	Aminoacid-levels-abnormal	elevated-alanine;elevated-proline;elevated-glycine;hypoaminoacidemia	METABOLIC	12928484	-
COX10	ENSG00000006695	220110	Aminoaciduria	increased-urinary-amino-acids;proximal-tubulopathy-related	METABOLIC	10767350;2834526	-
COX10	ENSG00000006695	220110	Anemia	macrocytic	HEMATOLOGIC	12928484	-
COX10	ENSG00000006695	220110	Ataxia	hypermetria	NEUROLOGIC	10767350;15455402	-
COX10	ENSG00000006695	220110	Blepharoptosis	ptosis	OPHTHALMOLOGIC	10767350	-
COX10	ENSG00000006695	220110	Bone-diseases	-	MUSCULOSKELETAL	#2834526	+
COX10	ENSG00000006695	220110	Brain-diseases	-	NEUROLOGIC	#12928484;#2834526;#10767350	+
COX10	ENSG00000006695	220110	Cardiomyopathy	hypertrophic	CARDIOVASCULAR	12928484	-
COX10	ENSG00000006695	220110	Cardiorespiratory-arrest	-	CARDIOVASCULAR	15455402;2834526;12928484	-
COX10	ENSG00000006695	220110	Cardiovascular-diseases	-	CARDIOVASCULAR	#12928484;#15455402;#2834526	+
COX10	ENSG00000006695	220110	Central-nervous-system-diseases	-	NEUROLOGIC	#12928484;#2834526;#10767350;#15455402	+
COX10	ENSG00000006695	220110	Cerebral-necrosis	-	NEUROLOGIC	12928484	-
COX10	ENSG00000006695	220110	Consciousness-disorders	comatose;low-level-of-awareness	NEUROLOGIC	2834526	-
COX10	ENSG00000006695	220110	Deglutition-disorders	swallowing-difficulties	GASTROINTESTINAL	2834526	-
COX10	ENSG00000006695	220110	Dehydration	dehydrated	METABOLIC	12928484;2834526	-
COX10	ENSG00000006695	220110	Developmental-delay	psychomotor-retardation;developmental-arrest	NEUROLOGIC	12928484;15455402	-
COX10	ENSG00000006695	220110	Digestive-system-diseases	-	GASTROINTESTINAL	#2834526;#12928484	+
COX10	ENSG00000006695	220110	Electroencephalogram-abnormal	generalized-slow-activity	NEUROLOGIC	2834526	-
COX10	ENSG00000006695	220110	Electroretinography-abnormal	consistent-with-tapetoretinal-degeneration	OPHTHALMOLOGIC	2834526	-
COX10	ENSG00000006695	220110	Encephalopathy	encephalomyelopathy;Leigh-like	NEUROLOGIC	10767350;12928484	-
COX10	ENSG00000006695	220110	Eye-diseases	-	OPHTHALMOLOGIC	#10767350;#2834526;#15455402	+
COX10	ENSG00000006695	220110	Failure-to-thrive	-	MISCELLANEOUS	12928484;15455402	-
COX10	ENSG00000006695	220110	Feeding-difficulties	anorexia	GASTROINTESTINAL	12928484;2834526	-
COX10	ENSG00000006695	220110	Gait-disorders	gait-abnormalities	NEUROLOGIC	2834526	-
COX10	ENSG00000006695	220110	Gastrointestinal-diseases	-	GASTROINTESTINAL	#2834526	+
COX10	ENSG00000006695	220110	Genitourinary-diseases	-	GENITOURINARY	#2834526;#10767350	+
COX10	ENSG00000006695	220110	Glucose-metabolism-disorders	-	METABOLIC	#2834526;#12928484	+
COX10	ENSG00000006695	220110	Glycosuria	normoglycemic-glycosuria	METABOLIC	2834526	-
COX10	ENSG00000006695	220110	Growth-deficiency	growth-failure	MISCELLANEOUS	2834526	-
COX10	ENSG00000006695	220110	Growth-disorders	-	MISCELLANEOUS	#12928484;#15455402;#2834526	+
COX10	ENSG00000006695	220110	Hearing-disorders	hearing-loss;sensorineural;deafness	NEUROLOGIC	12928484;2834526	-
COX10	ENSG00000006695	220110	Heart-diseases	-	CARDIOVASCULAR	#12928484	+
COX10	ENSG00000006695	220110	Hematologic-diseases	-	HEMATOLOGIC	#12928484	+
COX10	ENSG00000006695	220110	Hyperreflexia	clonus;deep-tendon-reflexes-abnormal	NEUROLOGIC	15455402	-
COX10	ENSG00000006695	220110	Hyperventilation	polypnea	RESPIRATORY	2834526	-
COX10	ENSG00000006695	220110	Hypoglycemia	-	METABOLIC	12928484	-
COX10	ENSG00000006695	220110	Hyporeflexia	deep-tendon-reflexes-disappeared	NEUROLOGIC	2834526	-
COX10	ENSG00000006695	220110	Hypotension	-	CARDIOVASCULAR	12928484	-
COX10	ENSG00000006695	220110	Hypouricemia	uric-acid-clearance-elevated;De-Toni-Fanconi-Debre-syndrome	METABOLIC	2834526	-
COX10	ENSG00000006695	220110	Kidney-diseases	-	GENITOURINARY	#2834526;#10767350	+
COX10	ENSG00000006695	220110	Lethargy	drowsiness	NEUROLOGIC	2834526	-
COX10	ENSG00000006695	220110	Leukoencephalopathy	leukodystrophy;progressive-leukodystrophy;CT-findings;white-matter-abnormal;hemispheral-white-matter-hypodensities	NEUROLOGIC	10767350;2834526	-
COX10	ENSG00000006695	220110	Metabolic-bone-diseases	-	MUSCULOSKELETAL	#2834526	+
COX10	ENSG00000006695	220110	Metabolic-diseases	-	METABOLIC	#10767350;#12928484;#15455402;#2834526	+
COX10	ENSG00000006695	220110	Mitochondria-abnormal	paracrystalline-inclusions	MISCELLANEOUS	2834526	-
COX10	ENSG00000006695	220110	Movement-disorders	short-periods-of-abnormal-movements	NEUROLOGIC	2834526	-
COX10	ENSG00000006695	220110	Muscle-aching-and-stiffness	muscle-pain;painful-limb-hypertonia	NEUROLOGIC	2834526	-
COX10	ENSG00000006695	220110	Muscle-hypertonia	limb-hypertonia	NEUROLOGIC	2834526	-
COX10	ENSG00000006695	220110	Muscle-hypotonia	trunkal-hypotonia	NEUROLOGIC	10767350;12928484;15455402;2834526	-
COX10	ENSG00000006695	220110	Muscle-weakness	severe	NEUROLOGIC	10767350	-
COX10	ENSG00000006695	220110	Muscular-diseases	Histology-findings;fiber-size-variations;type-1-fibre-vacuolation;type-2-fiber-atrophy	MUSCULOSKELETAL	2834526	-
COX10	ENSG00000006695	220110	Musculoskeletal-diseases	-	MUSCULOSKELETAL	#2834526	+
COX10	ENSG00000006695	220110	Nephritis	interstitial-tubulonephritis	GENITOURINARY	2834526	-
COX10	ENSG00000006695	220110	Nervous-system-diseases	-	NEUROLOGIC	#10767350;#15455402;#12928484;#2834526	+
COX10	ENSG00000006695	220110	Neurobehavioral-manifestations	-	NEUROLOGIC	#2834526;#15455402	+
COX10	ENSG00000006695	220110	Neurologic-manifestations	-	NEUROLOGIC	#10767350;#15455402;#2834526;#12928484	+
COX10	ENSG00000006695	220110	Neuromuscular-manifestations	-	NEUROLOGIC	#2834526;#10767350;#12928484;#15455402	+
COX10	ENSG00000006695	220110	Neuronal-loss-and-lesions	MRI-findings;bilateral-symmetric;brainstem-abnormal;basal-ganglia-abnormal;putamen-abnormal;globus-pallidus-abnormal;thalamus-abnormal;nucleus-ruber-abnormal;Leigh-like	NEUROLOGIC	12928484;15455402	-
COX10	ENSG00000006695	220110	Ocular-motility-disorders	-	OPHTHALMOLOGIC	#15455402;#2834526	+
COX10	ENSG00000006695	220110	Organic-acids-abnormal	lactic-aciduria;elevated-tricarboxylic-acid-cycle-intermediates	METABOLIC	10767350;15455402	-
COX10	ENSG00000006695	220110	Pathologic-nystagmus	low-amplitude-nystagmus	OPHTHALMOLOGIC	15455402;2834526	-
COX10	ENSG00000006695	220110	Peripheral-nervous-system-diseases	-	NEUROLOGIC	#2834526	+
COX10	ENSG00000006695	220110	Polyneuropathies	peripheral-neuropathy	NEUROLOGIC	2834526	-
COX10	ENSG00000006695	220110	Psychomotor-agitation	motor-agitation;pronounced-motor-agitation	NEUROLOGIC	15455402	-
COX10	ENSG00000006695	220110	Pyramidal-tract-signs	pyramidal-syndrome;bilateral-signs	NEUROLOGIC	10767350;2834526	-
COX10	ENSG00000006695	220110	RCCIV-deficiency	muscle;lymphocytes;fibroblasts;liver;kidney	MISCELLANEOUS	10767350;12928484;2834526	-
COX10	ENSG00000006695	220110	Reflexes-abnormal	-	NEUROLOGIC	#15455402;#2834526;#10767350	+
COX10	ENSG00000006695	220110	Renal-insufficiency	tubular-dysfunction;renal-tubular-acidosis;De-Toni-Fanconi-Debre-syndrome;hypercalciuria;hyperphosphaturia;proteinuria	GENITOURINARY	10767350;2834526	-
COX10	ENSG00000006695	220110	Respiration-disorders	-	RESPIRATORY	#2834526;#12928484	+
COX10	ENSG00000006695	220110	Respiratory-insufficiency	respiratory-failure;central-respiratory-failure	RESPIRATORY	12928484	-
COX10	ENSG00000006695	220110	Respiratory-tract-diseases	-	RESPIRATORY	#2834526;#12928484	+
COX10	ENSG00000006695	220110	Retinal-diseases	tapetoretinal-degeneration	OPHTHALMOLOGIC	2834526	-
COX10	ENSG00000006695	220110	Rickets	normocalcemic-normophosphatemic-rickets	MUSCULOSKELETAL	2834526	-
COX10	ENSG00000006695	220110	Seizures	epilepsy;status-epilepticus;convulsions	NEUROLOGIC	10767350	-
COX10	ENSG00000006695	220110	Spinal-cord-diseases	encephalomyelopathy;myelopathy;Leigh-like	NEUROLOGIC	12928484	-
COX10	ENSG00000006695	220110	Splenomegaly	mild-splenomegaly	MISCELLANEOUS	12928484	-
COX10	ENSG00000006695	220110	TCA-intermediates-elevated	tricarboxylic-acid-cycle-intermediates-elevated	METABOLIC	10767350	-
COX10	ENSG00000006695	220110	Urologic-diseases	-	GENITOURINARY	#2834526;#10767350	+
COX10	ENSG00000006695	220110	Vascular-diseases	-	CARDIOVASCULAR	#12928484	+
COX10	ENSG00000006695	220110	Vision-disorders	poor-eye-contact;weak-fixation;blindness	OPHTHALMOLOGIC	10767350;15455402;2834526	-
COX10	ENSG00000006695	220110	Water-electrolyte-imbalance	-	METABOLIC	#12928484;#2834526	+
COX15	ENSG00000014919	220110	Acid-base-imbalance	-	METABOLIC	#12474143;#15235026;#15863660	+
COX15	ENSG00000014919	220110	Acidosis	lactic-acidosis;CSF;blood	METABOLIC	12474143;15235026;15863660	-
COX15	ENSG00000014919	220110	Brain-diseases	-	NEUROLOGIC	#15863660;#15235026;#12474143	+
COX15	ENSG00000014919	220110	Cardiomyopathy	hypertrophic;biventricular	CARDIOVASCULAR	12474143	-
COX15	ENSG00000014919	220110	Cardiorespiratory-arrest	-	CARDIOVASCULAR	12474143;15235026	-
COX15	ENSG00000014919	220110	Cardiovascular-diseases	-	CARDIOVASCULAR	#12474143;#15235026	+
COX15	ENSG00000014919	220110	Central-nervous-system-diseases	-	NEUROLOGIC	#15863660;#15235026;#12474143	+
COX15	ENSG00000014919	220110	Cerebellar-atrophy	cerebellar-atrophy;bilateral-atrophy;cerebellar-white-matter-abnormalities	NEUROLOGIC	15863660	-
COX15	ENSG00000014919	220110	Craniofacial-abnormalities	-	MUSCULOSKELETAL	#12474143;#15235026	+
COX15	ENSG00000014919	220110	Developmental-delay	psychomotor-retardation	NEUROLOGIC	12474143;15235026;15863660	-
COX15	ENSG00000014919	220110	Digestive-system-diseases	-	GASTROINTESTINAL	#15235026;#15863660	+
COX15	ENSG00000014919	220110	Dysmorphism-and-abnormalities	midfacial-hypoplasia	MISCELLANEOUS	12474143	-
COX15	ENSG00000014919	220110	Dystonic-disorders	dystonic-postures;upper-limbs	NEUROLOGIC	15863660	-
COX15	ENSG00000014919	220110	Encephalopathy	encephalomyelopathy;Leigh-like	NEUROLOGIC	15235026;15863660	-
COX15	ENSG00000014919	220110	Eosinophilia	eosiniphilic-infiltrates;multiple-tissues	HEMATOLOGIC	12474143	-
COX15	ENSG00000014919	220110	Eye-diseases	-	OPHTHALMOLOGIC	#15863660;#15235026	+
COX15	ENSG00000014919	220110	Failure-to-thrive	-	MISCELLANEOUS	15863660	-
COX15	ENSG00000014919	220110	Feeding-difficulties	weight-loss;feeding-difficulties	GASTROINTESTINAL	15235026;15863660	-
COX15	ENSG00000014919	220110	Gastrointestinal-diseases	gastrointestinal-tract-dysfunction;bloody-bowel-motions	GASTROINTESTINAL	15235026	-
COX15	ENSG00000014919	220110	Growth-deficiency	growth-arrest	MISCELLANEOUS	12474143;15863660	-
COX15	ENSG00000014919	220110	Growth-disorders	-	MISCELLANEOUS	#15863660;#12474143	+
COX15	ENSG00000014919	220110	Heart-diseases	-	CARDIOVASCULAR	#12474143	+
COX15	ENSG00000014919	220110	Hematologic-diseases	-	HEMATOLOGIC	#12474143	+
COX15	ENSG00000014919	220110	Heme-levels-abnormal	mitochondrial;heme-A-decreased;heme-O-increased	METABOLIC	12474143	-
COX15	ENSG00000014919	220110	Hyperreflexia	brisk;deep-tendon-reflexes-abnormal	NEUROLOGIC	15863660	-
COX15	ENSG00000014919	220110	Leukocyte-disorders	-	HEMATOLOGIC	#12474143	+
COX15	ENSG00000014919	220110	Leukoencephalopathy	cerebellar-white-matter-abnormalities	NEUROLOGIC	15863660	-
COX15	ENSG00000014919	220110	Lung-diseases	-	RESPIRATORY	#12474143;#15235026	+
COX15	ENSG00000014919	220110	Metabolic-diseases	-	METABOLIC	#12474143;#15235026;#15863660	+
COX15	ENSG00000014919	220110	Microcephaly	progressive	MUSCULOSKELETAL	12474143;15235026	-
COX15	ENSG00000014919	220110	Mitochondria-abnormal	shapes-abnormal;cristae-abnormal;matrix-densities	MISCELLANEOUS	12474143	-
COX15	ENSG00000014919	220110	Movement-disorders	-	NEUROLOGIC	#15863660	+
COX15	ENSG00000014919	220110	Muscle-hypotonia	axial-hypotonia	NEUROLOGIC	12474143;15235026;15863660	-
COX15	ENSG00000014919	220110	Muscle-spasticity	spasticity-of-the-lower-limbs;lower-extremities	NEUROLOGIC	15235026	-
COX15	ENSG00000014919	220110	Muscle-weakness	-	NEUROLOGIC	15863660	-
COX15	ENSG00000014919	220110	Muscular-atrophy	muscle-wasting	NEUROLOGIC	15863660	-
COX15	ENSG00000014919	220110	Musculoskeletal-diseases	-	MUSCULOSKELETAL	#12474143;#15235026	+
COX15	ENSG00000014919	220110	Nervous-system-diseases	-	NEUROLOGIC	#15863660;#12474143;#15235026	+
COX15	ENSG00000014919	220110	Neurologic-manifestations	-	NEUROLOGIC	#15863660;#12474143;#15235026	+
COX15	ENSG00000014919	220110	Neuromuscular-manifestations	-	NEUROLOGIC	#12474143;#15235026;#15863660	+
COX15	ENSG00000014919	220110	Neuronal-loss-and-lesions	MRI-findings;bilateral-symmetric;basal-ganglia-abnormal;brainstem-abnormal;midbrain-abnormal;cerebral-peduncles-abnormal;periaqueductal-region-abnormal;Leigh-like;cerebellar-white-matter-abnormal;putamen-abnormal;nucleus-caudatus-abnormal	NEUROLOGIC	15235026;15863660	-
COX15	ENSG00000014919	220110	Ocular-motility-disorders	eye-movements-abnormal;incoordination	OPHTHALMOLOGIC	15863660;#15235026	-
COX15	ENSG00000014919	220110	Pathologic-nystagmus	horizontal-nystagmus	OPHTHALMOLOGIC	15235026	-
COX15	ENSG00000014919	220110	Pneumonia	pneumonia	RESPIRATORY	12474143;15235026	-
COX15	ENSG00000014919	220110	Postural-instability	progressive;postural-control-loss	NEUROLOGIC	15863660	-
COX15	ENSG00000014919	220110	RCCIV-deficiency	heart;kidney;liver;muscle;fibroblasts	MISCELLANEOUS	12474143;15863660	-
COX15	ENSG00000014919	220110	Reflexes-abnormal	-	NEUROLOGIC	#15863660	+
COX15	ENSG00000014919	220110	Respiratory-tract-diseases	-	RESPIRATORY	#12474143;#15235026	+
COX15	ENSG00000014919	220110	Retinal-diseases	retinopathy	OPHTHALMOLOGIC	15235026	-
COX15	ENSG00000014919	220110	Seizures	epileptic-seizures	NEUROLOGIC	12474143	-
COX15	ENSG00000014919	220110	Spinal-cord-diseases	encephalomyelopathy;myelopathy;Leigh-like	NEUROLOGIC	15235026;15863660	-
COX15	ENSG00000014919	220110	Tremor	cerebellar-tremor	NEUROLOGIC	15863660	-
CPOX	ENSG00000080819	121300	Abdominal-pain	colic;myalgias;recurrent;abdominal-complaints;abdominal-attacks;neurovisceral-crisis	GASTROINTESTINAL	9454777;12181641;15896662;12227458;7616659;11074238;9048920;9843038;11309681;9888388;11202054	-
CPOX	ENSG00000080819	121300	Adrenal-gland-diseases	-	ENDOCRINOLOGIC	#11739202	+
CPOX	ENSG00000080819	121300	Adrenal-insufficiency	adrenal-hypofunction	ENDOCRINOLOGIC	11739202	-
CPOX	ENSG00000080819	121300	Anemia	hemolytic;sideroblasts;dyserythropoiesis;erythroblastosis;dacryocytes;eptocytes;echinocytes	HEMATOLOGIC	6886003;9454777;16159891;11739202	-
CPOX	ENSG00000080819	121300	Anxiety-disorders	anxiety	PSYCHIATRIC	12181641;11804210	-
CPOX	ENSG00000080819	121300	Arrhythmia	tachycardia	CARDIOVASCULAR	9454777;15896662;7616659;11074238;9888388	-
CPOX	ENSG00000080819	121300	Blistering	bullous-eruptions	DERMATOLOGIC	12181641;6886003	-
CPOX	ENSG00000080819	121300	Blood-coagulation-disorders	-	HEMATOLOGIC	#11739202	+
CPOX	ENSG00000080819	121300	Blood-platelet-disorders	-	HEMATOLOGIC	#11739202	+
CPOX	ENSG00000080819	121300	Bone-marrow-diseases	hyperplastic-bone-marrow;50%-erythroblasts	HEMATOLOGIC	9454777	-
CPOX	ENSG00000080819	121300	Brain-diseases	-	NEUROLOGIC	#11202054;#12181641;#15896662;#7616659	+
CPOX	ENSG00000080819	121300	Cardiovascular-diseases	-	CARDIOVASCULAR	#9454777;#15896662;#7616659;#11074238;#9888388;#11804210	+
CPOX	ENSG00000080819	121300	Central-nervous-system-diseases	-	NEUROLOGIC	#11202054;#12181641;#15896662;#7616659	+
CPOX	ENSG00000080819	121300	Consciousness-disorders	coma	NEUROLOGIC	15896662	-
CPOX	ENSG00000080819	121300	Cryptorchidism	unilateral-cryptorchidism	GENITOURINARY	11739202	-
CPOX	ENSG00000080819	121300	Depressive-disorder	depression;lability;asthenia;psychiatric-symptoms	PSYCHIATRIC	12181641;11804210	-
CPOX	ENSG00000080819	121300	Developmental-delay	psychomotor-retardation	NEUROLOGIC	15896662	-
CPOX	ENSG00000080819	121300	Digestive-system-diseases	-	GASTROINTESTINAL	#9454777;#12181641;#15896662;#12227458;#7616659;#11074238;#9048920;#9843038;#11309681;#9888388;#11202054;#6886003;#11739202	+
CPOX	ENSG00000080819	121300	Dysarthria	-	NEUROLOGIC	11202054	-
CPOX	ENSG00000080819	121300	Endocrine-system-diseases	-	ENDOCRINOLOGIC	#11739202	+
CPOX	ENSG00000080819	121300	Gastrointestinal-diseases	-	GASTROINTESTINAL	#12181641;#15896662;#7616659	+
CPOX	ENSG00000080819	121300	Genitourinary-diseases	-	GENITOURINARY	#11739202;#9454777	+
CPOX	ENSG00000080819	121300	Glucose-metabolism-disorders	-	METABOLIC	#11739202	+
CPOX	ENSG00000080819	121300	Gonadal-disorders	-	ENDOCRINOLOGIC	#11739202	+
CPOX	ENSG00000080819	121300	Headache-disorders	headache;dizziness	NEUROLOGIC	11202054	-
CPOX	ENSG00000080819	121300	Heart-diseases	-	CARDIOVASCULAR	#9454777;#15896662;#7616659;#11074238;#9888388	+
CPOX	ENSG00000080819	121300	Hematologic-diseases	-	HEMATOLOGIC	#6886003;#9454777;#16159891;#11739202	+
CPOX	ENSG00000080819	121300	Hemochromatosis	hemosiderosis;liver	METABOLIC	9454777	-
CPOX	ENSG00000080819	121300	Hepatomegaly	neonatal;hepatosplenomegaly	GASTROINTESTINAL	6886003;9454777;11739202	-
CPOX	ENSG00000080819	121300	Hermaphroditism	male-pseudohermaphrodism	ENDOCRINOLOGIC	11739202	-
CPOX	ENSG00000080819	121300	Hyperbilirubinemia	neonatal;jaundice;icterus;icteric-skin	METABOLIC	6886003;9454777;16159891;11739202	-
CPOX	ENSG00000080819	121300	Hyperferricemia	high-serum-ferritin-levels;iron-overload	METABOLIC	16159891	-
CPOX	ENSG00000080819	121300	Hyperpigmentation	on-light-exposed-areas;backs-of-hands;arms;face	DERMATOLOGIC	16159891	-
CPOX	ENSG00000080819	121300	Hyperpituitarism	corticotropin-levels-abnormal;ACTH-elevated	ENDOCRINOLOGIC	11739202	-
CPOX	ENSG00000080819	121300	Hypertension	during-attacks	CARDIOVASCULAR	7616659;9454777;9888388;11804210	-
CPOX	ENSG00000080819	121300	Hyperventilation	tachypnea	RESPIRATORY	11739202	-
CPOX	ENSG00000080819	121300	Hypoandrogenism	plasma-testosterone-levels-decreased;low-normal	ENDOCRINOLOGIC	11739202	-
CPOX	ENSG00000080819	121300	Hypoglycemia	-	METABOLIC	11739202	-
CPOX	ENSG00000080819	121300	Hyponatremia	-	METABOLIC	15896662	-
CPOX	ENSG00000080819	121300	Hypospadias	severe-hypospadias	GENITOURINARY	11739202;9454777	-
CPOX	ENSG00000080819	121300	Intestinal-obstruction	ileus;constipation	GASTROINTESTINAL	12181641;15896662;7616659	-
CPOX	ENSG00000080819	121300	Lethargy	-	NEUROLOGIC	11739202	-
CPOX	ENSG00000080819	121300	Liver-diseases	map-like-appearance-of-the-liver-surface;slightly-depressed-dark-bluish-areas-and-reddish-brown-areas;liver-biopsy-showed-red-fluorescence;hydropic-degeneration-of-hepatocytes;needle-shaped-crystallines	GASTROINTESTINAL	7616659;#6886003;#9454777;#11739202	-
CPOX	ENSG00000080819	121300	Mental-disorders	-	PSYCHIATRIC	#12181641;#11804210	+
CPOX	ENSG00000080819	121300	Mental-retardation	-	NEUROLOGIC	15896662	-
CPOX	ENSG00000080819	121300	Metabolic-diseases	-	METABOLIC	#9454777;#6886003;#16159891;#11739202;#15896662;#12181641;#12227458;#7616659;#11074238;#9048920;#9843038;#11309681;#9888388;#11202054;#11804210	+
CPOX	ENSG00000080819	121300	Mood-disorders	-	PSYCHIATRIC	#12181641;#11804210	+
CPOX	ENSG00000080819	121300	Muscle-hypotonia	-	NEUROLOGIC	11739202	-
CPOX	ENSG00000080819	121300	Muscle-spasticity	spastic-motor-impairment	NEUROLOGIC	15896662	-
CPOX	ENSG00000080819	121300	Muscle-weakness	spastic-weakness;upper-limbs;lower-limbs;muscular-asthenia	NEUROLOGIC	15896662;11074238;11202054	-
CPOX	ENSG00000080819	121300	Nervous-system-diseases	-	NEUROLOGIC	#15896662;#11202054;#11739202;#11074238;#7616659;#12181641;#9454777;#9888388	+
CPOX	ENSG00000080819	121300	Neurobehavioral-manifestations	-	NEUROLOGIC	#15896662;#11202054;#11739202	+
CPOX	ENSG00000080819	121300	Neurologic-manifestations	-	NEUROLOGIC	#15896662;#11202054;#11739202;#11074238	+
CPOX	ENSG00000080819	121300	Neuromuscular-manifestations	-	NEUROLOGIC	#11739202;#15896662;#11074238;#11202054	+
CPOX	ENSG00000080819	121300	Paralysis-Paresis	quadriplegia	NEUROLOGIC	11202054	-
CPOX	ENSG00000080819	121300	Peripheral-nervous-system-diseases	peripheral-nervous-system-dysfunction	NEUROLOGIC	7616659;#12181641;#9454777;#15896662;#11074238;#9888388;#11202054	-
CPOX	ENSG00000080819	121300	Petechiae	-	HEMATOLOGIC	11739202	-
CPOX	ENSG00000080819	121300	Photosensitivity-disorders	occasional;skin-photosensitivity;photosensitive-cutaneous-lesions	DERMATOLOGIC	9454777;16159891;11739202;11074238;9843038;9888388	-
CPOX	ENSG00000080819	121300	Pigmentation-disorders	-	DERMATOLOGIC	#16159891	+
CPOX	ENSG00000080819	121300	Pituitary-diseases	-	ENDOCRINOLOGIC	#11739202	+
CPOX	ENSG00000080819	121300	Polyneuropathies	motor-neuropathy;sensory-neuropathy;paresthesia;dysesthesia;lower-extremities;peripheral-neuropathy;neuropathy	NEUROLOGIC	12181641;9454777;15896662;11074238;9888388;11202054	-
CPOX	ENSG00000080819	121300	Porphyrins-abnormal	plasma;erythrocyte;urine;stool;elevated-urine-delta-aminolevulinic-acid;elevated-urine-porphobilinogen;harderoporphyrins-abnormal	METABOLIC	12181641;6886003;9454777;16159891;15896662;12227458;11739202;7616659;11074238;9048920;9843038;11309681;9888388;11202054;11804210	-
CPOX	ENSG00000080819	121300	Porphyrinuria	dark-red-urine;porphobilinogen-elevated;portwine-colour	METABOLIC	6886003;15896662;12227458;11739202;7616659;11074238;9048920;9843038;11309681;9888388;11202054;11804210	-
CPOX	ENSG00000080819	121300	Prurigo	on-light-exposed-areas;backs-of-hands;arms;face	DERMATOLOGIC	16159891	-
CPOX	ENSG00000080819	121300	Pruritus	itching	DERMATOLOGIC	16159891	-
CPOX	ENSG00000080819	121300	Psychiatric-disorders	-	PSYCHIATRIC	#12181641;#11804210	+
CPOX	ENSG00000080819	121300	Psychomotor-agitation	agitation	NEUROLOGIC	15896662	-
CPOX	ENSG00000080819	121300	Respiration-disorders	-	RESPIRATORY	#11739202;#11202054	+
CPOX	ENSG00000080819	121300	Respiratory-insufficiency	respiratory-paralysis	RESPIRATORY	11202054	-
CPOX	ENSG00000080819	121300	Respiratory-tract-diseases	-	RESPIRATORY	#11739202;#11202054	+
CPOX	ENSG00000080819	121300	Seizures	epilepsy;epileptic-syndrome	NEUROLOGIC	12181641;15896662;7616659;11202054	-
CPOX	ENSG00000080819	121300	Sex-differentiation-disorders	bifid-scrotum;vaginal-opening-next-to-urinary-meatus;ambiguous-external-genitalia	ENDOCRINOLOGIC	11739202	-
CPOX	ENSG00000080819	121300	Skin-diseases	skin-fragility;tingling;cutaneous-lesions;milia;hyperplasic-epidermis;hypergranulosis;hyperkeratosis;irregular-acanthosis;hypoderm-and-derm-inflammation-with-predominant-polynuclear-cells;urticarial-exanthem	DERMATOLOGIC	12181641;16159891;11739202;11074238;11309681;11202054;#6886003;#9454777;#9843038;#9888388	-
CPOX	ENSG00000080819	121300	Speech-disorders	-	NEUROLOGIC	#11202054	+
CPOX	ENSG00000080819	121300	Splenomegaly	neonatal;hepatosplenomegaly	MISCELLANEOUS	6886003;9454777;11739202	-
CPOX	ENSG00000080819	121300	Thrombocytopenia	-	HEMATOLOGIC	11739202	-
CPOX	ENSG00000080819	121300	Urogenital-abnormalities	-	GENITOURINARY	#11739202;#9454777	+
CPOX	ENSG00000080819	121300	Vascular-diseases	-	CARDIOVASCULAR	#7616659;#9454777;#9888388;#11804210	+
CPOX	ENSG00000080819	121300	Vomiting	nausea;reflux-esophagitis	GASTROINTESTINAL	12181641;11074238;9888388;12227458	-
CPOX	ENSG00000080819	121300	Water-electrolyte-imbalance	-	METABOLIC	#15896662	+
CPS1	ENSG00000021826	237300	Aminoacid-levels-abnormal	plasma;decreased-citrulline;decreased-arginine;elevated-glutamine;elevated-glutamic-acid;elevated-alanine;elevated-asparagine	METABOLIC	9711878;12955727;11536261;8273985;6465866;15617192;11474210;12655559;11301219	-
CPS1	ENSG00000021826	237300	Arrhythmia	bradycardia;episodes	CARDIOVASCULAR	11301219	-
CPS1	ENSG00000021826	237300	Ataxia	intermittend;gait-ataxia	NEUROLOGIC	9711878;9686343;6465866	-
CPS1	ENSG00000021826	237300	Behavioral-symptoms	-	PSYCHIATRIC	#8486760;#9711878;#11474210	+
CPS1	ENSG00000021826	237300	Body-temperature-changes	-	MISCELLANEOUS	#12955727;#11536261	+
CPS1	ENSG00000021826	237300	Brain-diseases	-	NEUROLOGIC	#9686343;#8273985;#11301219;#15617192;#6465866;#12655559;#9711878;#12955727;#11536261	+
CPS1	ENSG00000021826	237300	Brain-edema	cerebral-edema;edematous-brain	NEUROLOGIC	9686343;8273985;11301219;15617192	-
CPS1	ENSG00000021826	237300	Cardiorespiratory-arrest	sudden-infant-death;neonatal-death	CARDIOVASCULAR	8486760;12955727;12655559;11301219	-
CPS1	ENSG00000021826	237300	Cardiovascular-diseases	-	CARDIOVASCULAR	#11301219;#8486760;#12955727;#12655559	+
CPS1	ENSG00000021826	237300	Central-nervous-system-diseases	-	NEUROLOGIC	#9686343;#8273985;#11301219;#15617192;#6465866;#12655559;#9711878;#12955727;#11536261	+
CPS1	ENSG00000021826	237300	Cerebral-atrophy	diffuse-atrophy;caudate-nuclei-atrophic;basal-ganglia-atrophic	NEUROLOGIC	11301219;15617192	-
CPS1	ENSG00000021826	237300	Cerebral-necrosis	necrotic-fragmentation;Alzheimer-type-II-astrocytes	NEUROLOGIC	11301219	-
CPS1	ENSG00000021826	237300	Consciousness-disorders	coma;disorientation;somnolence;somnolent	NEUROLOGIC	9711878;12955727;9686343;8273985;6465866;11301219;15617192	-
CPS1	ENSG00000021826	237300	Craniofacial-abnormalities	-	MUSCULOSKELETAL	#11301219	+
CPS1	ENSG00000021826	237300	Developmental-delay	psychomotor-retardation	NEUROLOGIC	8486760;9686343;6465866;11301219	-
CPS1	ENSG00000021826	237300	Diabetes-insipidus	-	ENDOCRINOLOGIC	8273985	-
CPS1	ENSG00000021826	237300	Digestive-system-diseases	-	GASTROINTESTINAL	#9711878;#6465866;#12955727;#9686343;#11301219;#15617192	+
CPS1	ENSG00000021826	237300	Electroencephalogram-abnormal	slow-dominant-background-rhythm	NEUROLOGIC	6465866	-
CPS1	ENSG00000021826	237300	Encephalopathy	hyperammonia-related;neurotoxicity;hyperammonemic-encephalopathy;encephalomalacia	NEUROLOGIC	12655559;15617192;11301219	-
[truncated: 8,203 more rows]
