# Supplementary material for: Mapping Gene Associations in Human Mitochondria using Clinical Disease Phenotypes
Source: PLoS Comput Biol. 2009 Apr 24;5(4):e1000374. doi: 10.1371/journal.pcbi.1000374 (PMC2668170; doi:10.1371/journal.pcbi.1000374)
Supplement: Table S4 — 27,938 QPA of disease gene pairs incl. 1,928 pairs with QPA and LR (3.78 MB XLS) [file pcbi.1000374.s007.xls]

## Sheet: TableS4
GENE-A NAME	GENE-A ENSEMBL	GENE-B NAME	GENE-B ENSEMBL	GENE-A MODULE	GENE-B MODULE	LIKELIHOOD RATIO (LR)	TRANSFORMED LR (tLR)	QPA	tLR-QPA GENE PAIRS (1,928 PAIRS)	CLUSTER GROUPS (FIG. S2)	GENE PAIRS (FIG. 2)	EDGE COLORS (FIG. 2)
AASS	ENSG00000008311	ABAT	ENSG00000183044			.	.	0.147699
AASS	ENSG00000008311	ABCB7	ENSG00000131269			.	.	0.253525
AASS	ENSG00000008311	ABCD1	ENSG00000101986			.	.	0.172194
AASS	ENSG00000008311	ACADL	ENSG00000115361			.	.	0.174101
AASS	ENSG00000008311	ACADM	ENSG00000117054			.	.	0.131445
AASS	ENSG00000008311	ACADS	ENSG00000122971			.	.	0.118817
AASS	ENSG00000008311	ACADSB	ENSG00000196177			.	.	0.172667
AASS	ENSG00000008311	ACADVL	ENSG00000072778			.	.	0.096578
AASS	ENSG00000008311	ACAT1	ENSG00000075239			.	.	0.143916
AASS	ENSG00000008311	ACSL4	ENSG00000068366			.	.	0.424331
AASS	ENSG00000008311	ACSL6	ENSG00000164398			.	.	0.16151
AASS	ENSG00000008311	AGXT	ENSG00000172482			.	.	0.252803
AASS	ENSG00000008311	ALAS2	ENSG00000158578			.	.	0.32511
AASS	ENSG00000008311	ALDH18A1	ENSG00000059573			.	.	0.383355
AASS	ENSG00000008311	ALDH4A1	ENSG00000159423			60.9	0.275209	0.230182	yes	cluster-1
AASS	ENSG00000008311	ALDH5A1	ENSG00000112294			.	.	0.158492
AASS	ENSG00000008311	ALDH6A1	ENSG00000119711			.	.	0.507025
AASS	ENSG00000008311	AMACR	ENSG00000082196			.	.	0.156687
AASS	ENSG00000008311	AMT	ENSG00000145020		GCC	.	.	0.190886
AASS	ENSG00000008311	ATP7B	ENSG00000123191			.	.	0.042752
AASS	ENSG00000008311	ATPAF2	ENSG00000171953			.	.	0.752286
AASS	ENSG00000008311	AUH	ENSG00000148090			.	.	0.141463
AASS	ENSG00000008311	BCKDHA	ENSG00000142046		BCKDH	.	.	0.212978
AASS	ENSG00000008311	BCKDHB	ENSG00000083123		BCKDH	.	.	0.207468
AASS	ENSG00000008311	BCL2	ENSG00000171791			.	.	0.036364
AASS	ENSG00000008311	BCS1L	ENSG00000074582			.	.	0.779817
AASS	ENSG00000008311	CASP8	ENSG00000064012			.	.	0.096861
AASS	ENSG00000008311	CLN3	ENSG00000188603			.	.	0.159981
AASS	ENSG00000008311	COX10	ENSG00000006695		RCC4	.	.	0.354544
AASS	ENSG00000008311	COX15	ENSG00000014919		RCC4	.	.	0.272974
AASS	ENSG00000008311	CPOX	ENSG00000080819			.	.	0.248173
AASS	ENSG00000008311	CPS1	ENSG00000021826		UC	.	.	0.188684
AASS	ENSG00000008311	CPT1A	ENSG00000110090			.	.	0.146572
AASS	ENSG00000008311	CPT2	ENSG00000157184			.	.	0.100329
AASS	ENSG00000008311	CYB5R3	ENSG00000100243			.	.	0.081833
AASS	ENSG00000008311	CYBA	ENSG00000051523			.	.	0.054943
AASS	ENSG00000008311	CYBB	ENSG00000165168			.	.	0.133918
AASS	ENSG00000008311	CYP11A1	ENSG00000140459			.	.	0.177813
AASS	ENSG00000008311	CYP11B1	ENSG00000160882			.	.	0.162474
AASS	ENSG00000008311	CYP11B2	ENSG00000179142			.	.	0.141203
AASS	ENSG00000008311	CYP27A1	ENSG00000135929			.	.	0.148036
AASS	ENSG00000008311	CYP27B1	ENSG00000111012			.	.	0.180337
AASS	ENSG00000008311	DBT	ENSG00000137992		BCKDH	0.7	.	0.189422
AASS	ENSG00000008311	DGUOK	ENSG00000114956			.	.	0.141928
AASS	ENSG00000008311	DLAT	ENSG00000150768		PDH	.	.	0.085144
AASS	ENSG00000008311	DLD	ENSG00000091140		AKDH;BCKDH;GCC;PDH;TCA	.	.	0.183541
AASS	ENSG00000008311	DLST	ENSG00000119689		AKDH;TCA	.	.	0.284397
AASS	ENSG00000008311	DMGDH	ENSG00000132837			95.4	0.305983	0.984758	yes	cluster-2
AASS	ENSG00000008311	DMPK	ENSG00000104936			.	.	0.109971
AASS	ENSG00000008311	DNAJC19	ENSG00000205981			.	.	0.358349
AASS	ENSG00000008311	ECGF1	ENSG00000025708			.	.	0.165251
AASS	ENSG00000008311	ETFA	ENSG00000140374			.	.	0.146133
AASS	ENSG00000008311	ETFB	ENSG00000105379			.	.	0.136319
AASS	ENSG00000008311	ETFDH	ENSG00000171503			.	.	0.155725
AASS	ENSG00000008311	ETHE1	ENSG00000105755			.	.	0.13814
AASS	ENSG00000008311	FECH	ENSG00000066926			.	.	0.08655
AASS	ENSG00000008311	FH	ENSG00000091483		TCA	.	.	0.084556
AASS	ENSG00000008311	FXN	ENSG00000165060			.	.	0.221589
AASS	ENSG00000008311	GATM	ENSG00000171766			.	.	0.391736
AASS	ENSG00000008311	GCDH	ENSG00000105607			.	.	0.135805
AASS	ENSG00000008311	GCK	ENSG00000106633			.	.	0.251985
AASS	ENSG00000008311	GCSH	ENSG00000140905		GCC	.	.	0.433453
AASS	ENSG00000008311	GDAP1	ENSG00000104381			.	.	0.464162
AASS	ENSG00000008311	GFM1	ENSG00000168827			.	.	0.254989
AASS	ENSG00000008311	GK	ENSG00000198814			.	.	0.176568
AASS	ENSG00000008311	GLDC	ENSG00000178445		GCC	.	.	0.276224
AASS	ENSG00000008311	GLUD1	ENSG00000148672			.	.	0.202676
AASS	ENSG00000008311	GPD2	ENSG00000115159			.	.	1
AASS	ENSG00000008311	HADH	ENSG00000138796			.	.	0.133132
AASS	ENSG00000008311	HADHA	ENSG00000084754			.	.	0.095067
AASS	ENSG00000008311	HADHB	ENSG00000138029			.	.	0.162427
AASS	ENSG00000008311	HD	ENSG00000197386			.	.	0.095076
AASS	ENSG00000008311	HK1	ENSG00000156515			.	.	0.230897
AASS	ENSG00000008311	HLCS	ENSG00000159267			.	.	0.128751
AASS	ENSG00000008311	HMGCL	ENSG00000117305			.	.	0.161013
AASS	ENSG00000008311	HMGCS2	ENSG00000134240			.	.	0.165275
AASS	ENSG00000008311	HSD17B10	ENSG00000072506			.	.	0.198676
AASS	ENSG00000008311	HSD3B2	ENSG00000203859			.	.	0.162503
AASS	ENSG00000008311	HSPD1	ENSG00000144381			.	.	0.237008
AASS	ENSG00000008311	HTRA2	ENSG00000115317			.	.	0.580892
AASS	ENSG00000008311	IVD	ENSG00000128928			.	.	0.160791
AASS	ENSG00000008311	KIF1B	ENSG00000054523			.	.	0.664088
AASS	ENSG00000008311	LRPPRC	ENSG00000138095			.	.	0.265335
AASS	ENSG00000008311	LRRK2	ENSG00000188906			.	.	0.379404
AASS	ENSG00000008311	MAOA	ENSG00000189221			.	.	0.127904
AASS	ENSG00000008311	MCCC1	ENSG00000078070			.	.	0.156008
AASS	ENSG00000008311	MCCC2	ENSG00000131844			.	.	0.147203
AASS	ENSG00000008311	ME2	ENSG00000082212			.	.	0.381325
AASS	ENSG00000008311	MFN2	ENSG00000116688			.	.	0.064141
AASS	ENSG00000008311	MLYCD	ENSG00000103150			.	.	0.172849
AASS	ENSG00000008311	MMAA	ENSG00000151611			.	.	0.125967
AASS	ENSG00000008311	MMAB	ENSG00000139428			.	.	0.170082
AASS	ENSG00000008311	MPV17	ENSG00000115204			.	.	0.247788
AASS	ENSG00000008311	MRPS16	ENSG00000182180			.	.	0.319482
AASS	ENSG00000008311	MTHFD1	ENSG00000100714			240.7	0.369437	0.287047	yes	cluster-1
AASS	ENSG00000008311	MTRR	ENSG00000124275			50	0.261687	0.338182	yes	cluster-1
AASS	ENSG00000008311	MUT	ENSG00000146085			.	.	0.134685
AASS	ENSG00000008311	NAGS	ENSG00000161653		UC	.	.	0.173844
AASS	ENSG00000008311	NDUFA12L	ENSG00000164182		RCC1	.	.	0.255244
AASS	ENSG00000008311	NDUFS1	ENSG00000023228		RCC1	.	.	0.352188
AASS	ENSG00000008311	NDUFS2	ENSG00000158864		RCC1	.	.	0.210362
AASS	ENSG00000008311	NDUFS3	ENSG00000110536		RCC1	.	.	0.416848
AASS	ENSG00000008311	NDUFS4	ENSG00000164258		RCC1	.	.	0.187092
AASS	ENSG00000008311	NDUFS6	ENSG00000145494		RCC1	.	.	0.343461
AASS	ENSG00000008311	NDUFS7	ENSG00000115286		RCC1	.	.	0.157569
AASS	ENSG00000008311	NDUFS8	ENSG00000110717		RCC1	.	.	0.222505
AASS	ENSG00000008311	NDUFV1	ENSG00000167792		RCC1	.	.	0.269297
AASS	ENSG00000008311	NDUFV2	ENSG00000178127		RCC1	.	.	0.116422
AASS	ENSG00000008311	OAT	ENSG00000065154			.	.	0.27105
AASS	ENSG00000008311	OGDH	ENSG00000105953		AKDH;TCA	.	.	0.712303
AASS	ENSG00000008311	OPA1	ENSG00000198836			.	.	0.192677
AASS	ENSG00000008311	OPA3	ENSG00000125741			.	.	0.193918
AASS	ENSG00000008311	OTC	ENSG00000036473		UC	.	.	0.141748
AASS	ENSG00000008311	OXCT1	ENSG00000083720			.	.	0.175989
AASS	ENSG00000008311	PANK2	ENSG00000125779			.	.	0.321293
AASS	ENSG00000008311	PARK7	ENSG00000116288			.	.	0.355214
AASS	ENSG00000008311	PARL	ENSG00000175193			.	.	1
AASS	ENSG00000008311	PC	ENSG00000173599			.	.	0.143269
AASS	ENSG00000008311	PCCA	ENSG00000175198			.	.	0.132867
AASS	ENSG00000008311	PCCB	ENSG00000114054			.	.	0.111402
AASS	ENSG00000008311	PCK2	ENSG00000100889			.	.	0.641932
AASS	ENSG00000008311	PDHA1	ENSG00000131828		PDH;TCA	.	.	0.137197
AASS	ENSG00000008311	PDHB	ENSG00000168291		PDH	.	.	0.392958
AASS	ENSG00000008311	PDHX	ENSG00000110435		PDH	.	.	0.117487
AASS	ENSG00000008311	PEO1	ENSG00000107815			.	.	0.078627
AASS	ENSG00000008311	PINK1	ENSG00000158828			.	.	0.335719
AASS	ENSG00000008311	POLG	ENSG00000140521			.	.	0.135772
AASS	ENSG00000008311	POLG2	ENSG00000136480			.	.	0.664088
AASS	ENSG00000008311	PPOX	ENSG00000143224			.	.	0.183071
AASS	ENSG00000008311	PRODH	ENSG00000100033			95.4	0.305983	0.291332	yes	cluster-1
AASS	ENSG00000008311	PUS1	ENSG00000177192			.	.	0.35613
AASS	ENSG00000008311	RMRP	ENSG00000199916			.	.	0.279487
AASS	ENSG00000008311	SCO1	ENSG00000133028		RCC4	.	.	0.291723
AASS	ENSG00000008311	SCO2	ENSG00000130489		RCC4	.	.	0.194625
AASS	ENSG00000008311	SDHA	ENSG00000073578		RCC2;TCA	.	.	0.115434
AASS	ENSG00000008311	SDHB	ENSG00000117118		RCC2;TCA	.	.	0.20745
AASS	ENSG00000008311	SDHC	ENSG00000143252		RCC2;TCA	.	.	0.089793
AASS	ENSG00000008311	SDHD	ENSG00000204370		RCC2;TCA	.	.	0.04608
AASS	ENSG00000008311	SLC19A2	ENSG00000117479			.	.	0.132094
AASS	ENSG00000008311	SLC25A13	ENSG00000004864		UC	.	.	0.131978
AASS	ENSG00000008311	SLC25A15	ENSG00000102743		UC	.	.	0.220312
AASS	ENSG00000008311	SLC25A16	ENSG00000122912			.	.	0.469391
AASS	ENSG00000008311	SLC25A19	ENSG00000125454			.	.	0.426836
AASS	ENSG00000008311	SLC25A20	ENSG00000178537			.	.	0.131411
AASS	ENSG00000008311	SLC25A22	ENSG00000177542			.	.	0.374017
AASS	ENSG00000008311	SLC25A4	ENSG00000151729			.	.	0.267107
AASS	ENSG00000008311	SOD1	ENSG00000142168			.	.	0.2566
AASS	ENSG00000008311	SPAST	ENSG00000021574			.	.	0.102615
AASS	ENSG00000008311	SPG7	ENSG00000197912			.	.	0.108269
AASS	ENSG00000008311	STAR	ENSG00000147465			.	.	0.170871
AASS	ENSG00000008311	SUCLA2	ENSG00000136143		TCA	.	.	0.357864
AASS	ENSG00000008311	SUOX	ENSG00000139531			54.4	0.26747	0.126023	yes	cluster-1
AASS	ENSG00000008311	SURF1	ENSG00000148290		RCC4	.	.	0.134606
AASS	ENSG00000008311	TAT	ENSG00000198650			.	.	0.397745
AASS	ENSG00000008311	TAZ	ENSG00000102125			.	.	0.190135
AASS	ENSG00000008311	TIMM8A	ENSG00000126953			.	.	0.148082
AASS	ENSG00000008311	TK2	ENSG00000166548			.	.	0.155059
AASS	ENSG00000008311	TP53	ENSG00000141510			50.9	0.26291	0.030389	yes	cluster-1
AASS	ENSG00000008311	UCP1	ENSG00000109424			.	.	0.75
AASS	ENSG00000008311	UCP2	ENSG00000175567			.	.	1
AASS	ENSG00000008311	UCP3	ENSG00000175564			.	.	1
AASS	ENSG00000008311	UQCRB	ENSG00000156467			.	.	0.867527
AASS	ENSG00000008311	UROS	ENSG00000188690			.	.	0.113304
AASS	ENSG00000008311	WFS1	ENSG00000109501			.	.	0.346871
ABAT	ENSG00000183044	AASS	ENSG00000008311			.	.	0.147699
ABAT	ENSG00000183044	ABCB7	ENSG00000131269			.	.	0.172525
ABAT	ENSG00000183044	ABCD1	ENSG00000101986			.	.	0.129951
ABAT	ENSG00000183044	ACADL	ENSG00000115361			.	.	0.133985
ABAT	ENSG00000183044	ACADM	ENSG00000117054			.	.	0.082528
ABAT	ENSG00000183044	ACADS	ENSG00000122971			.	.	0.138788
ABAT	ENSG00000183044	ACADSB	ENSG00000196177			.	.	0.259364
ABAT	ENSG00000183044	ACADVL	ENSG00000072778			.	.	0.090094
ABAT	ENSG00000183044	ACAT1	ENSG00000075239			.	.	0.102211
ABAT	ENSG00000183044	ACSL4	ENSG00000068366			.	.	0.454826
ABAT	ENSG00000183044	ACSL6	ENSG00000164398			.	.	0.121775
ABAT	ENSG00000183044	AGXT	ENSG00000172482			.	.	0.059007
ABAT	ENSG00000183044	ALAS2	ENSG00000158578			.	.	0.079318
ABAT	ENSG00000183044	ALDH18A1	ENSG00000059573			.	.	0.231713
ABAT	ENSG00000183044	ALDH2	ENSG00000111275			0.5	.	0.25
ABAT	ENSG00000183044	ALDH4A1	ENSG00000159423			.	.	0.157236
ABAT	ENSG00000183044	ALDH5A1	ENSG00000112294			41.1	0.248248	0.144022	yes	cluster-1
ABAT	ENSG00000183044	ALDH6A1	ENSG00000119711			.	.	0.116685
ABAT	ENSG00000183044	AMACR	ENSG00000082196			.	.	0.118617
ABAT	ENSG00000183044	AMT	ENSG00000145020		GCC	.	.	0.192755
ABAT	ENSG00000183044	ATP7B	ENSG00000123191			.	.	0.058986
ABAT	ENSG00000183044	ATPAF2	ENSG00000171953			.	.	0.244057
ABAT	ENSG00000183044	AUH	ENSG00000148090			.	.	0.116158
ABAT	ENSG00000183044	BCKDHA	ENSG00000142046		BCKDH	.	.	0.08788
ABAT	ENSG00000183044	BCKDHB	ENSG00000083123		BCKDH	.	.	0.127192
ABAT	ENSG00000183044	BCL2	ENSG00000171791			.	.	0.026913
ABAT	ENSG00000183044	BCS1L	ENSG00000074582			.	.	0.153997
ABAT	ENSG00000183044	CASP8	ENSG00000064012			.	.	0.063842
ABAT	ENSG00000183044	CLN3	ENSG00000188603			.	.	0.074407
ABAT	ENSG00000183044	COX10	ENSG00000006695		RCC4	.	.	0.185155
ABAT	ENSG00000183044	COX15	ENSG00000014919		RCC4	.	.	0.241329
ABAT	ENSG00000183044	CPOX	ENSG00000080819			.	.	0.076558
ABAT	ENSG00000183044	CPS1	ENSG00000021826		UC	.	.	0.132554
ABAT	ENSG00000183044	CPT1A	ENSG00000110090			.	.	0.093328
ABAT	ENSG00000183044	CPT2	ENSG00000157184			.	.	0.034938
ABAT	ENSG00000183044	CYB5R3	ENSG00000100243			.	.	0.143535
ABAT	ENSG00000183044	CYBA	ENSG00000051523			.	.	0.064415
ABAT	ENSG00000183044	CYBB	ENSG00000165168			.	.	0.13522
ABAT	ENSG00000183044	CYP11A1	ENSG00000140459			.	.	0.10237
ABAT	ENSG00000183044	CYP11B1	ENSG00000160882			.	.	0.039793
ABAT	ENSG00000183044	CYP11B2	ENSG00000179142			.	.	0.046907
ABAT	ENSG00000183044	CYP27A1	ENSG00000135929			.	.	0.09615
ABAT	ENSG00000183044	CYP27B1	ENSG00000111012			.	.	0.197415
ABAT	ENSG00000183044	DBT	ENSG00000137992		BCKDH	.	.	0.142704
ABAT	ENSG00000183044	DGUOK	ENSG00000114956			.	.	0.149968
ABAT	ENSG00000183044	DLAT	ENSG00000150768		PDH	.	.	0.092935
ABAT	ENSG00000183044	DLD	ENSG00000091140		AKDH;BCKDH;GCC;PDH;TCA	.	.	0.142658
ABAT	ENSG00000183044	DLST	ENSG00000119689		AKDH;TCA	.	.	0.159451
ABAT	ENSG00000183044	DMGDH	ENSG00000132837			.	.	0.169646
ABAT	ENSG00000183044	DMPK	ENSG00000104936			.	.	0.062185
ABAT	ENSG00000183044	DNAJC19	ENSG00000205981			.	.	0.288188
ABAT	ENSG00000183044	ECGF1	ENSG00000025708			.	.	0.14377
ABAT	ENSG00000183044	ETFA	ENSG00000140374			.	.	0.115118
ABAT	ENSG00000183044	ETFB	ENSG00000105379			.	.	0.032019
ABAT	ENSG00000183044	ETFDH	ENSG00000171503			.	.	0.048635
ABAT	ENSG00000183044	ETHE1	ENSG00000105755			.	.	0.148805
ABAT	ENSG00000183044	FECH	ENSG00000066926			.	.	0.084032
ABAT	ENSG00000183044	FH	ENSG00000091483		TCA	.	.	0.059518
ABAT	ENSG00000183044	FXN	ENSG00000165060			.	.	0.109207
ABAT	ENSG00000183044	GATM	ENSG00000171766			.	.	0.238608
ABAT	ENSG00000183044	GCDH	ENSG00000105607			.	.	0.121675
ABAT	ENSG00000183044	GCK	ENSG00000106633			.	.	0.111422
ABAT	ENSG00000183044	GCSH	ENSG00000140905		GCC	.	.	0.169648
ABAT	ENSG00000183044	GDAP1	ENSG00000104381			.	.	0.29542
ABAT	ENSG00000183044	GFM1	ENSG00000168827			.	.	0.292475
ABAT	ENSG00000183044	GK	ENSG00000198814			.	.	0.101607
ABAT	ENSG00000183044	GLDC	ENSG00000178445		GCC	.	.	0.137015
ABAT	ENSG00000183044	GLUD1	ENSG00000148672			.	.	0.188802
ABAT	ENSG00000183044	GPD2	ENSG00000115159			.	.	0.333333
ABAT	ENSG00000183044	HADH	ENSG00000138796			.	.	0.084461
ABAT	ENSG00000183044	HADHA	ENSG00000084754			.	.	0.08223
ABAT	ENSG00000183044	HADHB	ENSG00000138029			.	.	0.072474
ABAT	ENSG00000183044	HD	ENSG00000197386			.	.	0.099348
ABAT	ENSG00000183044	HK1	ENSG00000156515			.	.	0.10238
ABAT	ENSG00000183044	HLCS	ENSG00000159267			.	.	0.104381
ABAT	ENSG00000183044	HMGCL	ENSG00000117305			.	.	0.134061
ABAT	ENSG00000183044	HMGCS2	ENSG00000134240			.	.	0.091745
ABAT	ENSG00000183044	HSD17B10	ENSG00000072506			.	.	0.229415
ABAT	ENSG00000183044	HSD3B2	ENSG00000203859			.	.	0.06633
ABAT	ENSG00000183044	HSPD1	ENSG00000144381			.	.	0.397708
ABAT	ENSG00000183044	HTRA2	ENSG00000115317			.	.	0.609301
ABAT	ENSG00000183044	IVD	ENSG00000128928			.	.	0.139756
ABAT	ENSG00000183044	KIF1B	ENSG00000054523			.	.	0.517177
ABAT	ENSG00000183044	LRPPRC	ENSG00000138095			.	.	0.315646
ABAT	ENSG00000183044	LRRK2	ENSG00000188906			.	.	0.169602
ABAT	ENSG00000183044	MAOA	ENSG00000189221			52.1	0.264508	0.236811	yes	cluster-1
ABAT	ENSG00000183044	MCCC1	ENSG00000078070			.	.	0.12447
ABAT	ENSG00000183044	MCCC2	ENSG00000131844			.	.	0.146644
ABAT	ENSG00000183044	ME2	ENSG00000082212			.	.	0.288158
ABAT	ENSG00000183044	MFN2	ENSG00000116688			.	.	0.319604
ABAT	ENSG00000183044	MLYCD	ENSG00000103150			.	.	0.120712
ABAT	ENSG00000183044	MMAA	ENSG00000151611			.	.	0.134703
ABAT	ENSG00000183044	MMAB	ENSG00000139428			.	.	0.186726
ABAT	ENSG00000183044	MPV17	ENSG00000115204			.	.	0.149012
ABAT	ENSG00000183044	MRPS16	ENSG00000182180			.	.	0.224764
ABAT	ENSG00000183044	MTHFD1	ENSG00000100714			.	.	0.077013
ABAT	ENSG00000183044	MTRR	ENSG00000124275			.	.	0.125654
ABAT	ENSG00000183044	MUT	ENSG00000146085			.	.	0.082175
ABAT	ENSG00000183044	NAGS	ENSG00000161653		UC	.	.	0.131123
ABAT	ENSG00000183044	NDUFA12L	ENSG00000164182		RCC1	.	.	0.265941
ABAT	ENSG00000183044	NDUFS1	ENSG00000023228		RCC1	.	.	0.289114
ABAT	ENSG00000183044	NDUFS2	ENSG00000158864		RCC1	.	.	0.17164
ABAT	ENSG00000183044	NDUFS3	ENSG00000110536		RCC1	.	.	0.304372
ABAT	ENSG00000183044	NDUFS4	ENSG00000164258		RCC1	.	.	0.224751
ABAT	ENSG00000183044	NDUFS6	ENSG00000145494		RCC1	.	.	0.447545
ABAT	ENSG00000183044	NDUFS7	ENSG00000115286		RCC1	.	.	0.244228
ABAT	ENSG00000183044	NDUFS8	ENSG00000110717		RCC1	.	.	0.131089
ABAT	ENSG00000183044	NDUFV1	ENSG00000167792		RCC1	.	.	0.269423
ABAT	ENSG00000183044	NDUFV2	ENSG00000178127		RCC1	.	.	0.215915
ABAT	ENSG00000183044	OAT	ENSG00000065154			.	.	0.050631
ABAT	ENSG00000183044	OGDH	ENSG00000105953		AKDH;TCA	.	.	0.231526
ABAT	ENSG00000183044	OPA1	ENSG00000198836			.	.	0.15649
ABAT	ENSG00000183044	OPA3	ENSG00000125741			.	.	0.138014
ABAT	ENSG00000183044	OTC	ENSG00000036473		UC	.	.	0.1099
ABAT	ENSG00000183044	OXCT1	ENSG00000083720			.	.	0.109378
ABAT	ENSG00000183044	PANK2	ENSG00000125779			.	.	0.205524
ABAT	ENSG00000183044	PARK7	ENSG00000116288			.	.	0.339948
ABAT	ENSG00000183044	PARL	ENSG00000175193			.	.	0.333333
ABAT	ENSG00000183044	PC	ENSG00000173599			.	.	0.080659
ABAT	ENSG00000183044	PCCA	ENSG00000175198			.	.	0.088827
ABAT	ENSG00000183044	PCCB	ENSG00000114054			.	.	0.078672
ABAT	ENSG00000183044	PCK2	ENSG00000100889			.	.	0.258984
ABAT	ENSG00000183044	PDHA1	ENSG00000131828		PDH;TCA	.	.	0.090864
ABAT	ENSG00000183044	PDHB	ENSG00000168291		PDH	.	.	0.343795
ABAT	ENSG00000183044	PDHX	ENSG00000110435		PDH	.	.	0.161264
ABAT	ENSG00000183044	PEO1	ENSG00000107815			.	.	0.093699
ABAT	ENSG00000183044	PINK1	ENSG00000158828			.	.	0.267617
ABAT	ENSG00000183044	POLG	ENSG00000140521			.	.	0.086944
ABAT	ENSG00000183044	POLG2	ENSG00000136480			.	.	0.396528
ABAT	ENSG00000183044	PPOX	ENSG00000143224			.	.	0.087783
ABAT	ENSG00000183044	PRODH	ENSG00000100033			.	.	0.186752
ABAT	ENSG00000183044	PUS1	ENSG00000177192			.	.	0.14844
ABAT	ENSG00000183044	RMRP	ENSG00000199916			.	.	0.118149
ABAT	ENSG00000183044	SCO1	ENSG00000133028		RCC4	.	.	0.320954
ABAT	ENSG00000183044	SCO2	ENSG00000130489		RCC4	.	.	0.082664
ABAT	ENSG00000183044	SDHA	ENSG00000073578		RCC2;TCA	.	.	0.099122
ABAT	ENSG00000183044	SDHB	ENSG00000117118		RCC2;TCA	.	.	0.154559
ABAT	ENSG00000183044	SDHC	ENSG00000143252		RCC2;TCA	.	.	0.104454
ABAT	ENSG00000183044	SDHD	ENSG00000204370		RCC2;TCA	.	.	0.120388
ABAT	ENSG00000183044	SLC19A2	ENSG00000117479			.	.	0.066224
ABAT	ENSG00000183044	SLC25A13	ENSG00000004864		UC	.	.	0.135099
ABAT	ENSG00000183044	SLC25A15	ENSG00000102743		UC	.	.	0.125798
ABAT	ENSG00000183044	SLC25A16	ENSG00000122912			.	.	0.361033
ABAT	ENSG00000183044	SLC25A19	ENSG00000125454			.	.	0.206442
ABAT	ENSG00000183044	SLC25A20	ENSG00000178537			.	.	0.101004
ABAT	ENSG00000183044	SLC25A22	ENSG00000177542			.	.	0.351892
ABAT	ENSG00000183044	SLC25A4	ENSG00000151729			.	.	0.183471
ABAT	ENSG00000183044	SOD1	ENSG00000142168			.	.	0.213817
ABAT	ENSG00000183044	SPAST	ENSG00000021574			.	.	0.209205
ABAT	ENSG00000183044	SPG7	ENSG00000197912			.	.	0.140295
ABAT	ENSG00000183044	STAR	ENSG00000147465			.	.	0.077374
ABAT	ENSG00000183044	SUCLA2	ENSG00000136143		TCA	.	.	0.332051
ABAT	ENSG00000183044	SUOX	ENSG00000139531			.	.	0.13212
ABAT	ENSG00000183044	SURF1	ENSG00000148290		RCC4	.	.	0.148049
ABAT	ENSG00000183044	TAT	ENSG00000198650			.	.	0.140201
ABAT	ENSG00000183044	TAZ	ENSG00000102125			.	.	0.097224
ABAT	ENSG00000183044	TIMM8A	ENSG00000126953			.	.	0.143927
ABAT	ENSG00000183044	TK2	ENSG00000166548			.	.	0.141955
ABAT	ENSG00000183044	TP53	ENSG00000141510			.	.	0.019789
ABAT	ENSG00000183044	UCP1	ENSG00000109424			.	.	0.25
ABAT	ENSG00000183044	UCP2	ENSG00000175567			.	.	0.333333
ABAT	ENSG00000183044	UCP3	ENSG00000175564			.	.	0.333333
ABAT	ENSG00000183044	UNG	ENSG00000076248			.	.	0.166667
ABAT	ENSG00000183044	UQCRB	ENSG00000156467			.	.	0.169452
ABAT	ENSG00000183044	UROS	ENSG00000188690			.	.	0.038559
ABAT	ENSG00000183044	WFS1	ENSG00000109501			.	.	0.081698
ABCB7	ENSG00000131269	AASS	ENSG00000008311			.	.	0.253525
ABCB7	ENSG00000131269	ABAT	ENSG00000183044			.	.	0.172525
ABCB7	ENSG00000131269	ABCD1	ENSG00000101986			.	.	0.083033
ABCB7	ENSG00000131269	ACADL	ENSG00000115361			.	.	0.261132
ABCB7	ENSG00000131269	ACADM	ENSG00000117054			.	.	0.115929
ABCB7	ENSG00000131269	ACADS	ENSG00000122971			.	.	0.126618
ABCB7	ENSG00000131269	ACADSB	ENSG00000196177			.	.	0.169024
ABCB7	ENSG00000131269	ACADVL	ENSG00000072778			.	.	0.075217
ABCB7	ENSG00000131269	ACAT1	ENSG00000075239			.	.	0.255343
ABCB7	ENSG00000131269	ACSL4	ENSG00000068366			.	.	0.239106
ABCB7	ENSG00000131269	ACSL6	ENSG00000164398			.	.	0.751342
ABCB7	ENSG00000131269	AGXT	ENSG00000172482			.	.	0.040242
ABCB7	ENSG00000131269	ALAS2	ENSG00000158578			.	.	0.670755
ABCB7	ENSG00000131269	ALDH18A1	ENSG00000059573			.	.	0.371561
ABCB7	ENSG00000131269	ALDH2	ENSG00000111275			.	.	0.08781
ABCB7	ENSG00000131269	ALDH4A1	ENSG00000159423			.	.	0.385962
ABCB7	ENSG00000131269	ALDH5A1	ENSG00000112294			.	.	0.165138
ABCB7	ENSG00000131269	ALDH6A1	ENSG00000119711			.	.	0.275699
ABCB7	ENSG00000131269	AMACR	ENSG00000082196			.	.	0.169916
ABCB7	ENSG00000131269	AMT	ENSG00000145020		GCC	.	.	0.492996
ABCB7	ENSG00000131269	ATP7B	ENSG00000123191			.	.	0.069135
ABCB7	ENSG00000131269	ATPAF2	ENSG00000171953			.	.	0.452272
ABCB7	ENSG00000131269	AUH	ENSG00000148090			.	.	0.297468
ABCB7	ENSG00000131269	BAX	ENSG00000087088			.	.	0.242457
ABCB7	ENSG00000131269	BCKDHA	ENSG00000142046		BCKDH	.	.	0.145656
ABCB7	ENSG00000131269	BCKDHB	ENSG00000083123		BCKDH	.	.	0.247443
ABCB7	ENSG00000131269	BCL2	ENSG00000171791			.	.	0.435465
ABCB7	ENSG00000131269	BCS1L	ENSG00000074582			.	.	0.174082
ABCB7	ENSG00000131269	CASP8	ENSG00000064012			.	.	0.273845
ABCB7	ENSG00000131269	CLN3	ENSG00000188603			.	.	0.150269
ABCB7	ENSG00000131269	COX10	ENSG00000006695		RCC4	.	.	0.313553
ABCB7	ENSG00000131269	COX15	ENSG00000014919		RCC4	.	.	0.205609
ABCB7	ENSG00000131269	CPOX	ENSG00000080819			.	.	0.285276
ABCB7	ENSG00000131269	CPS1	ENSG00000021826		UC	.	.	0.284396
ABCB7	ENSG00000131269	CPT1A	ENSG00000110090			.	.	0.080538
ABCB7	ENSG00000131269	CPT2	ENSG00000157184			.	.	0.199459
ABCB7	ENSG00000131269	CYB5A	ENSG00000166347			.	.	1
ABCB7	ENSG00000131269	CYB5R3	ENSG00000100243			.	.	0.220111
ABCB7	ENSG00000131269	CYBA	ENSG00000051523			.	.	0.418739
ABCB7	ENSG00000131269	CYBB	ENSG00000165168			.	.	0.219489
ABCB7	ENSG00000131269	CYP11A1	ENSG00000140459			.	.	0.298347
ABCB7	ENSG00000131269	CYP11B1	ENSG00000160882			.	.	0.076938
ABCB7	ENSG00000131269	CYP11B2	ENSG00000179142			.	.	0.043387
ABCB7	ENSG00000131269	CYP27A1	ENSG00000135929			.	.	0.164453
ABCB7	ENSG00000131269	CYP27B1	ENSG00000111012			.	.	0.189557
ABCB7	ENSG00000131269	DBT	ENSG00000137992		BCKDH	.	.	0.324307
ABCB7	ENSG00000131269	DGUOK	ENSG00000114956			.	.	0.426935
ABCB7	ENSG00000131269	DLAT	ENSG00000150768		PDH	.	.	0.063021
ABCB7	ENSG00000131269	DLD	ENSG00000091140		AKDH;BCKDH;GCC;PDH;TCA	.	.	0.090331
ABCB7	ENSG00000131269	DLST	ENSG00000119689		AKDH;TCA	.	.	0.130341
ABCB7	ENSG00000131269	DMGDH	ENSG00000132837			.	.	0.4
ABCB7	ENSG00000131269	DMPK	ENSG00000104936			.	.	0.060201
ABCB7	ENSG00000131269	DNAJC19	ENSG00000205981			.	.	0.879784
ABCB7	ENSG00000131269	ECGF1	ENSG00000025708			.	.	0.173031
ABCB7	ENSG00000131269	ETFA	ENSG00000140374			.	.	0.111669
ABCB7	ENSG00000131269	ETFB	ENSG00000105379			.	.	0.229529
ABCB7	ENSG00000131269	ETFDH	ENSG00000171503			.	.	0.238764
ABCB7	ENSG00000131269	ETHE1	ENSG00000105755			.	.	0.323907
ABCB7	ENSG00000131269	FECH	ENSG00000066926			0.4	.	0.302744
ABCB7	ENSG00000131269	FH	ENSG00000091483		TCA	.	.	0.122351
ABCB7	ENSG00000131269	FXN	ENSG00000165060			.	.	0.296653
ABCB7	ENSG00000131269	GATM	ENSG00000171766			.	.	0.346764
ABCB7	ENSG00000131269	GCDH	ENSG00000105607			.	.	0.120982
ABCB7	ENSG00000131269	GCK	ENSG00000106633			.	.	0.118934
ABCB7	ENSG00000131269	GCSH	ENSG00000140905		GCC	.	.	0.452972
ABCB7	ENSG00000131269	GDAP1	ENSG00000104381			.	.	0.248033
ABCB7	ENSG00000131269	GFM1	ENSG00000168827			.	.	0.27807
ABCB7	ENSG00000131269	GK	ENSG00000198814			.	.	0.123807
ABCB7	ENSG00000131269	GLDC	ENSG00000178445		GCC	.	.	0.326744
ABCB7	ENSG00000131269	GLUD1	ENSG00000148672			.	.	0.294602
ABCB7	ENSG00000131269	GPD2	ENSG00000115159			.	.	0.4
ABCB7	ENSG00000131269	HADH	ENSG00000138796			.	.	0.222966
ABCB7	ENSG00000131269	HADHA	ENSG00000084754			.	.	0.123
ABCB7	ENSG00000131269	HADHB	ENSG00000138029			.	.	0.119278
ABCB7	ENSG00000131269	HD	ENSG00000197386			.	.	0.117111
ABCB7	ENSG00000131269	HK1	ENSG00000156515			.	.	0.713397
ABCB7	ENSG00000131269	HLCS	ENSG00000159267			.	.	0.230284
ABCB7	ENSG00000131269	HMGCL	ENSG00000117305			.	.	0.249311
ABCB7	ENSG00000131269	HMGCS2	ENSG00000134240			.	.	0.384161
ABCB7	ENSG00000131269	HSD17B10	ENSG00000072506			.	.	0.159701
ABCB7	ENSG00000131269	HSD3B2	ENSG00000203859			.	.	0.11485
ABCB7	ENSG00000131269	HSPD1	ENSG00000144381			.	.	0.624979
ABCB7	ENSG00000131269	HTRA2	ENSG00000115317			.	.	0.473979
ABCB7	ENSG00000131269	IVD	ENSG00000128928			.	.	0.303174
ABCB7	ENSG00000131269	KIF1B	ENSG00000054523			.	.	0.534387
ABCB7	ENSG00000131269	LRPPRC	ENSG00000138095			.	.	0.317497
ABCB7	ENSG00000131269	LRRK2	ENSG00000188906			.	.	0.416664
ABCB7	ENSG00000131269	MAOA	ENSG00000189221			.	.	0.187843
ABCB7	ENSG00000131269	MCCC1	ENSG00000078070			.	.	0.196636
ABCB7	ENSG00000131269	MCCC2	ENSG00000131844			.	.	0.118785
ABCB7	ENSG00000131269	ME2	ENSG00000082212			.	.	0.758322
ABCB7	ENSG00000131269	MFN2	ENSG00000116688			.	.	0.274213
ABCB7	ENSG00000131269	MLYCD	ENSG00000103150			.	.	0.17359
ABCB7	ENSG00000131269	MMAA	ENSG00000151611			.	.	0.170368
ABCB7	ENSG00000131269	MMAB	ENSG00000139428			.	.	0.283476
ABCB7	ENSG00000131269	MPV17	ENSG00000115204			.	.	0.216691
ABCB7	ENSG00000131269	MRPS16	ENSG00000182180			.	.	0.423416
ABCB7	ENSG00000131269	MTCP1	ENSG00000182712			.	.	0.375
ABCB7	ENSG00000131269	MTHFD1	ENSG00000100714			.	.	0.362015
ABCB7	ENSG00000131269	MTRR	ENSG00000124275			.	.	0.299085
ABCB7	ENSG00000131269	MUT	ENSG00000146085			.	.	0.24349
ABCB7	ENSG00000131269	NAGS	ENSG00000161653		UC	.	.	0.193853
ABCB7	ENSG00000131269	NDUFA12L	ENSG00000164182		RCC1	.	.	0.597604
ABCB7	ENSG00000131269	NDUFS1	ENSG00000023228		RCC1	.	.	0.548635
ABCB7	ENSG00000131269	NDUFS2	ENSG00000158864		RCC1	.	.	0.219397
ABCB7	ENSG00000131269	NDUFS3	ENSG00000110536		RCC1	.	.	0.654872
ABCB7	ENSG00000131269	NDUFS4	ENSG00000164258		RCC1	.	.	0.217905
ABCB7	ENSG00000131269	NDUFS6	ENSG00000145494		RCC1	.	.	0.581055
ABCB7	ENSG00000131269	NDUFS7	ENSG00000115286		RCC1	.	.	0.354111
ABCB7	ENSG00000131269	NDUFS8	ENSG00000110717		RCC1	.	.	0.199643
ABCB7	ENSG00000131269	NDUFV1	ENSG00000167792		RCC1	.	.	0.2077
ABCB7	ENSG00000131269	NDUFV2	ENSG00000178127		RCC1	.	.	0.0712
ABCB7	ENSG00000131269	OAT	ENSG00000065154			.	.	0.177642
ABCB7	ENSG00000131269	OGDH	ENSG00000105953		AKDH;TCA	.	.	0.223309
ABCB7	ENSG00000131269	OPA1	ENSG00000198836			.	.	0.09
ABCB7	ENSG00000131269	OPA3	ENSG00000125741			.	.	0.269934
ABCB7	ENSG00000131269	OTC	ENSG00000036473		UC	.	.	0.181251
ABCB7	ENSG00000131269	OXCT1	ENSG00000083720			.	.	0.14508
ABCB7	ENSG00000131269	PANK2	ENSG00000125779			.	.	0.327249
ABCB7	ENSG00000131269	PARK7	ENSG00000116288			.	.	0.289914
ABCB7	ENSG00000131269	PARL	ENSG00000175193			.	.	0.4
ABCB7	ENSG00000131269	PC	ENSG00000173599			.	.	0.131067
ABCB7	ENSG00000131269	PCCA	ENSG00000175198			.	.	0.157388
ABCB7	ENSG00000131269	PCCB	ENSG00000114054			.	.	0.159019
ABCB7	ENSG00000131269	PCK2	ENSG00000100889			.	.	0.4
ABCB7	ENSG00000131269	PDHA1	ENSG00000131828		PDH;TCA	.	.	0.102775
ABCB7	ENSG00000131269	PDHB	ENSG00000168291		PDH	.	.	0.474393
ABCB7	ENSG00000131269	PDHX	ENSG00000110435		PDH	.	.	0.113199
ABCB7	ENSG00000131269	PEO1	ENSG00000107815			.	.	0.128402
ABCB7	ENSG00000131269	PINK1	ENSG00000158828			.	.	0.261264
ABCB7	ENSG00000131269	POLG	ENSG00000140521			.	.	0.13221
ABCB7	ENSG00000131269	POLG2	ENSG00000136480			.	.	0.610307
ABCB7	ENSG00000131269	PPOX	ENSG00000143224			.	.	0.234031
ABCB7	ENSG00000131269	PRODH	ENSG00000100033			.	.	0.153487
ABCB7	ENSG00000131269	PUS1	ENSG00000177192			.	.	0.452234
ABCB7	ENSG00000131269	RMRP	ENSG00000199916			.	.	0.276152
ABCB7	ENSG00000131269	SCO1	ENSG00000133028		RCC4	.	.	0.707344
ABCB7	ENSG00000131269	SCO2	ENSG00000130489		RCC4	.	.	0.088032
ABCB7	ENSG00000131269	SDHA	ENSG00000073578		RCC2;TCA	.	.	0.122204
ABCB7	ENSG00000131269	SDHB	ENSG00000117118		RCC2;TCA	.	.	0.037767
ABCB7	ENSG00000131269	SDHC	ENSG00000143252		RCC2;TCA	.	.	0.031466
ABCB7	ENSG00000131269	SDHD	ENSG00000204370		RCC2;TCA	.	.	0.058946
ABCB7	ENSG00000131269	SLC19A2	ENSG00000117479			.	.	0.40819
ABCB7	ENSG00000131269	SLC25A13	ENSG00000004864		UC	.	.	0.228268
ABCB7	ENSG00000131269	SLC25A15	ENSG00000102743		UC	.	.	0.250101
ABCB7	ENSG00000131269	SLC25A16	ENSG00000122912			.	.	0.21892
ABCB7	ENSG00000131269	SLC25A19	ENSG00000125454			.	.	0.393695
ABCB7	ENSG00000131269	SLC25A20	ENSG00000178537			.	.	0.06051
ABCB7	ENSG00000131269	SLC25A22	ENSG00000177542			.	.	0.338848
ABCB7	ENSG00000131269	SLC25A4	ENSG00000151729			.	.	0.20305
ABCB7	ENSG00000131269	SOD1	ENSG00000142168			.	.	0.192359
ABCB7	ENSG00000131269	SPAST	ENSG00000021574			.	.	0.244565
ABCB7	ENSG00000131269	SPG7	ENSG00000197912			.	.	0.201106
ABCB7	ENSG00000131269	STAR	ENSG00000147465			.	.	0.199736
ABCB7	ENSG00000131269	SUCLA2	ENSG00000136143		TCA	.	.	0.71776
ABCB7	ENSG00000131269	SUOX	ENSG00000139531			.	.	0.122024
ABCB7	ENSG00000131269	SURF1	ENSG00000148290		RCC4	.	.	0.160002
ABCB7	ENSG00000131269	TAT	ENSG00000198650			.	.	0.447376
ABCB7	ENSG00000131269	TAZ	ENSG00000102125			.	.	0.349752
ABCB7	ENSG00000131269	TIMM8A	ENSG00000126953			.	.	0.208124
ABCB7	ENSG00000131269	TK2	ENSG00000166548			.	.	0.147808
ABCB7	ENSG00000131269	TP53	ENSG00000141510			.	.	0.02186
ABCB7	ENSG00000131269	UCP1	ENSG00000109424			.	.	0.3
ABCB7	ENSG00000131269	UCP2	ENSG00000175567			.	.	0.4
ABCB7	ENSG00000131269	UCP3	ENSG00000175564			.	.	0.4
ABCB7	ENSG00000131269	UNG	ENSG00000076248			.	.	1
ABCB7	ENSG00000131269	UQCRB	ENSG00000156467			.	.	0.4
ABCB7	ENSG00000131269	UROS	ENSG00000188690			.	.	0.263129
ABCB7	ENSG00000131269	WFS1	ENSG00000109501			.	.	0.106978
ABCD1	ENSG00000101986	AASS	ENSG00000008311			.	.	0.172194
ABCD1	ENSG00000101986	ABAT	ENSG00000183044			.	.	0.129951
ABCD1	ENSG00000101986	ABCB7	ENSG00000131269			.	.	0.083033
ABCD1	ENSG00000101986	ACADL	ENSG00000115361			.	.	0.139582
ABCD1	ENSG00000101986	ACADM	ENSG00000117054			.	.	0.086839
ABCD1	ENSG00000101986	ACADS	ENSG00000122971			.	.	0.07077
ABCD1	ENSG00000101986	ACADSB	ENSG00000196177			.	.	0.087722
ABCD1	ENSG00000101986	ACADVL	ENSG00000072778			.	.	0.100463
ABCD1	ENSG00000101986	ACAT1	ENSG00000075239			.	.	0.108258
ABCD1	ENSG00000101986	ACSL4	ENSG00000068366			.	.	0.154105
ABCD1	ENSG00000101986	ACSL6	ENSG00000164398			.	.	0.08751
ABCD1	ENSG00000101986	AGXT	ENSG00000172482			.	.	0.186893
ABCD1	ENSG00000101986	ALAS2	ENSG00000158578			.	.	0.054019
ABCD1	ENSG00000101986	ALDH18A1	ENSG00000059573			.	.	0.222209
ABCD1	ENSG00000101986	ALDH2	ENSG00000111275			.	.	0.199011
ABCD1	ENSG00000101986	ALDH4A1	ENSG00000159423			.	.	0.171193
ABCD1	ENSG00000101986	ALDH5A1	ENSG00000112294			.	.	0.082075
ABCD1	ENSG00000101986	ALDH6A1	ENSG00000119711			.	.	0.589389
ABCD1	ENSG00000101986	AMACR	ENSG00000082196			.	.	0.144757
ABCD1	ENSG00000101986	AMT	ENSG00000145020		GCC	.	.	0.214404
ABCD1	ENSG00000101986	ATP7B	ENSG00000123191			.	.	0.033354
ABCD1	ENSG00000101986	ATPAF2	ENSG00000171953			.	.	0.291404
ABCD1	ENSG00000101986	AUH	ENSG00000148090			.	.	0.093235
ABCD1	ENSG00000101986	BAX	ENSG00000087088			.	.	0.016807
ABCD1	ENSG00000101986	BCKDHA	ENSG00000142046		BCKDH	.	.	0.0999
ABCD1	ENSG00000101986	BCKDHB	ENSG00000083123		BCKDH	.	.	0.19696
ABCD1	ENSG00000101986	BCL2	ENSG00000171791			.	.	0.038573
ABCD1	ENSG00000101986	BCS1L	ENSG00000074582			.	.	0.123582
ABCD1	ENSG00000101986	CASP8	ENSG00000064012			.	.	0.027922
ABCD1	ENSG00000101986	CLN3	ENSG00000188603			.	.	0.084791
ABCD1	ENSG00000101986	COX10	ENSG00000006695		RCC4	.	.	0.165103
ABCD1	ENSG00000101986	COX15	ENSG00000014919		RCC4	.	.	0.210568
ABCD1	ENSG00000101986	CPOX	ENSG00000080819			.	.	0.073373
ABCD1	ENSG00000101986	CPS1	ENSG00000021826		UC	.	.	0.084599
ABCD1	ENSG00000101986	CPT1A	ENSG00000110090			.	.	0.161025
ABCD1	ENSG00000101986	CPT2	ENSG00000157184			.	.	0.088445
ABCD1	ENSG00000101986	CYB5A	ENSG00000166347			.	.	0.549584
ABCD1	ENSG00000101986	CYB5R3	ENSG00000100243			.	.	0.037776
ABCD1	ENSG00000101986	CYBA	ENSG00000051523			.	.	0.024435
ABCD1	ENSG00000101986	CYBB	ENSG00000165168			.	.	0.029624
ABCD1	ENSG00000101986	CYP11A1	ENSG00000140459			.	.	0.391233
ABCD1	ENSG00000101986	CYP11B1	ENSG00000160882			.	.	0.321012
ABCD1	ENSG00000101986	CYP11B2	ENSG00000179142			.	.	0.430077
ABCD1	ENSG00000101986	CYP27A1	ENSG00000135929			.	.	0.103485
ABCD1	ENSG00000101986	CYP27B1	ENSG00000111012			.	.	0.440641
ABCD1	ENSG00000101986	DBT	ENSG00000137992		BCKDH	.	.	0.148121
ABCD1	ENSG00000101986	DGUOK	ENSG00000114956			.	.	0.133073
ABCD1	ENSG00000101986	DLAT	ENSG00000150768		PDH	.	.	0.044419
ABCD1	ENSG00000101986	DLD	ENSG00000091140		AKDH;BCKDH;GCC;PDH;TCA	.	.	0.084221
ABCD1	ENSG00000101986	DLST	ENSG00000119689		AKDH;TCA	.	.	0.097729
ABCD1	ENSG00000101986	DMGDH	ENSG00000132837			.	.	0.705882
ABCD1	ENSG00000101986	DMPK	ENSG00000104936			.	.	0.059899
ABCD1	ENSG00000101986	DNAJC19	ENSG00000205981			.	.	0.365376
ABCD1	ENSG00000101986	ECGF1	ENSG00000025708			.	.	0.244379
ABCD1	ENSG00000101986	ETFA	ENSG00000140374			.	.	0.085844
ABCD1	ENSG00000101986	ETFB	ENSG00000105379			.	.	0.127777
ABCD1	ENSG00000101986	ETFDH	ENSG00000171503			.	.	0.165735
ABCD1	ENSG00000101986	ETHE1	ENSG00000105755			.	.	0.139441
ABCD1	ENSG00000101986	FECH	ENSG00000066926			.	.	0.144988
ABCD1	ENSG00000101986	FH	ENSG00000091483		TCA	.	.	0.084252
ABCD1	ENSG00000101986	FXN	ENSG00000165060			.	.	0.088578
ABCD1	ENSG00000101986	GATM	ENSG00000171766			.	.	0.265132
ABCD1	ENSG00000101986	GCDH	ENSG00000105607			.	.	0.091082
ABCD1	ENSG00000101986	GCK	ENSG00000106633			.	.	0.136033
ABCD1	ENSG00000101986	GCSH	ENSG00000140905		GCC	.	.	0.223724
ABCD1	ENSG00000101986	GDAP1	ENSG00000104381			.	.	0.177376
ABCD1	ENSG00000101986	GFM1	ENSG00000168827			.	.	0.393441
ABCD1	ENSG00000101986	GK	ENSG00000198814			.	.	0.074211
ABCD1	ENSG00000101986	GLDC	ENSG00000178445		GCC	.	.	0.120719
ABCD1	ENSG00000101986	GLUD1	ENSG00000148672			.	.	0.24356
ABCD1	ENSG00000101986	GPD2	ENSG00000115159			.	.	0.705882
ABCD1	ENSG00000101986	HADH	ENSG00000138796			.	.	0.123234
ABCD1	ENSG00000101986	HADHA	ENSG00000084754			.	.	0.089528
ABCD1	ENSG00000101986	HADHB	ENSG00000138029			.	.	0.08693
ABCD1	ENSG00000101986	HD	ENSG00000197386			.	.	0.058787
ABCD1	ENSG00000101986	HK1	ENSG00000156515			.	.	0.046394
ABCD1	ENSG00000101986	HLCS	ENSG00000159267			.	.	0.082864
ABCD1	ENSG00000101986	HMGCL	ENSG00000117305			.	.	0.121488
ABCD1	ENSG00000101986	HMGCS2	ENSG00000134240			.	.	0.395367
ABCD1	ENSG00000101986	HSD17B10	ENSG00000072506			.	.	0.100585
ABCD1	ENSG00000101986	HSD3B2	ENSG00000203859			.	.	0.262759
ABCD1	ENSG00000101986	HSPD1	ENSG00000144381			.	.	0.334666
ABCD1	ENSG00000101986	HTRA2	ENSG00000115317			.	.	0.232335
ABCD1	ENSG00000101986	IVD	ENSG00000128928			.	.	0.082468
ABCD1	ENSG00000101986	KIF1B	ENSG00000054523			.	.	0.257102
ABCD1	ENSG00000101986	LRPPRC	ENSG00000138095			.	.	0.136923
ABCD1	ENSG00000101986	LRRK2	ENSG00000188906			.	.	0.1041
ABCD1	ENSG00000101986	MAOA	ENSG00000189221			.	.	0.162042
ABCD1	ENSG00000101986	MCCC1	ENSG00000078070			.	.	0.139172
ABCD1	ENSG00000101986	MCCC2	ENSG00000131844			.	.	0.138822
ABCD1	ENSG00000101986	ME2	ENSG00000082212			.	.	0.257977
ABCD1	ENSG00000101986	MFN2	ENSG00000116688			.	.	0.159219
ABCD1	ENSG00000101986	MLYCD	ENSG00000103150			.	.	0.120963
ABCD1	ENSG00000101986	MMAA	ENSG00000151611			.	.	0.092251
ABCD1	ENSG00000101986	MMAB	ENSG00000139428			.	.	0.176889
ABCD1	ENSG00000101986	MPV17	ENSG00000115204			.	.	0.242457
ABCD1	ENSG00000101986	MRPS16	ENSG00000182180			.	.	0.397831
ABCD1	ENSG00000101986	MTCP1	ENSG00000182712			.	.	0.022059
ABCD1	ENSG00000101986	MTHFD1	ENSG00000100714			.	.	0.241228
ABCD1	ENSG00000101986	MTRR	ENSG00000124275			.	.	0.083052
ABCD1	ENSG00000101986	MUT	ENSG00000146085			.	.	0.099399
ABCD1	ENSG00000101986	NAGS	ENSG00000161653		UC	.	.	0.080185
ABCD1	ENSG00000101986	NDUFA12L	ENSG00000164182		RCC1	.	.	0.331915
ABCD1	ENSG00000101986	NDUFS1	ENSG00000023228		RCC1	.	.	0.272082
ABCD1	ENSG00000101986	NDUFS2	ENSG00000158864		RCC1	.	.	0.152156
ABCD1	ENSG00000101986	NDUFS3	ENSG00000110536		RCC1	.	.	0.36378
ABCD1	ENSG00000101986	NDUFS4	ENSG00000164258		RCC1	.	.	0.205811
ABCD1	ENSG00000101986	NDUFS6	ENSG00000145494		RCC1	.	.	0.266691
ABCD1	ENSG00000101986	NDUFS7	ENSG00000115286		RCC1	.	.	0.127527
ABCD1	ENSG00000101986	NDUFS8	ENSG00000110717		RCC1	.	.	0.096884
ABCD1	ENSG00000101986	NDUFV1	ENSG00000167792		RCC1	.	.	0.142264
ABCD1	ENSG00000101986	NDUFV2	ENSG00000178127		RCC1	.	.	0.081364
ABCD1	ENSG00000101986	OAT	ENSG00000065154			.	.	0.173175
ABCD1	ENSG00000101986	OGDH	ENSG00000105953		AKDH;TCA	.	.	0.391901
ABCD1	ENSG00000101986	OPA1	ENSG00000198836			.	.	0.143536
ABCD1	ENSG00000101986	OPA3	ENSG00000125741			.	.	0.178373
ABCD1	ENSG00000101986	OTC	ENSG00000036473		UC	.	.	0.086603
ABCD1	ENSG00000101986	OXCT1	ENSG00000083720			.	.	0.087215
ABCD1	ENSG00000101986	PANK2	ENSG00000125779			.	.	0.140668
ABCD1	ENSG00000101986	PARK7	ENSG00000116288			.	.	0.110003
ABCD1	ENSG00000101986	PARL	ENSG00000175193			.	.	0.705882
ABCD1	ENSG00000101986	PC	ENSG00000173599			.	.	0.138086
ABCD1	ENSG00000101986	PCCA	ENSG00000175198			.	.	0.110449
ABCD1	ENSG00000101986	PCCB	ENSG00000114054			.	.	0.055761
ABCD1	ENSG00000101986	PCK2	ENSG00000100889			.	.	0.605599
ABCD1	ENSG00000101986	PDHA1	ENSG00000131828		PDH;TCA	.	.	0.094866
ABCD1	ENSG00000101986	PDHB	ENSG00000168291		PDH	.	.	0.470114
ABCD1	ENSG00000101986	PDHX	ENSG00000110435		PDH	.	.	0.094965
ABCD1	ENSG00000101986	PEO1	ENSG00000107815			.	.	0.079161
ABCD1	ENSG00000101986	PINK1	ENSG00000158828			.	.	0.099593
ABCD1	ENSG00000101986	POLG	ENSG00000140521			.	.	0.064792
ABCD1	ENSG00000101986	POLG2	ENSG00000136480			.	.	0.261674
ABCD1	ENSG00000101986	PPOX	ENSG00000143224			.	.	0.075181
ABCD1	ENSG00000101986	PRODH	ENSG00000100033			.	.	0.077399
ABCD1	ENSG00000101986	PUS1	ENSG00000177192			.	.	0.089948
ABCD1	ENSG00000101986	RMRP	ENSG00000199916			.	.	0.030586
ABCD1	ENSG00000101986	SCO1	ENSG00000133028		RCC4	.	.	0.467135
ABCD1	ENSG00000101986	SCO2	ENSG00000130489		RCC4	.	.	0.094786
ABCD1	ENSG00000101986	SDHA	ENSG00000073578		RCC2;TCA	.	.	0.160339
ABCD1	ENSG00000101986	SDHB	ENSG00000117118		RCC2;TCA	.	.	0.129779
ABCD1	ENSG00000101986	SDHC	ENSG00000143252		RCC2;TCA	.	.	0.032778
ABCD1	ENSG00000101986	SDHD	ENSG00000204370		RCC2;TCA	.	.	0.027097
ABCD1	ENSG00000101986	SLC19A2	ENSG00000117479			.	.	0.075067
ABCD1	ENSG00000101986	SLC25A13	ENSG00000004864		UC	.	.	0.087796
ABCD1	ENSG00000101986	SLC25A15	ENSG00000102743		UC	.	.	0.08622
ABCD1	ENSG00000101986	SLC25A16	ENSG00000122912			.	.	0.148022
ABCD1	ENSG00000101986	SLC25A19	ENSG00000125454			.	.	0.213016
ABCD1	ENSG00000101986	SLC25A20	ENSG00000178537			.	.	0.068336
ABCD1	ENSG00000101986	SLC25A22	ENSG00000177542			.	.	0.266539
ABCD1	ENSG00000101986	SLC25A4	ENSG00000151729			.	.	0.106832
ABCD1	ENSG00000101986	SOD1	ENSG00000142168			.	.	0.12381
ABCD1	ENSG00000101986	SPAST	ENSG00000021574			.	.	0.162746
ABCD1	ENSG00000101986	SPG7	ENSG00000197912			.	.	0.127896
ABCD1	ENSG00000101986	STAR	ENSG00000147465			.	.	0.349195
ABCD1	ENSG00000101986	SUCLA2	ENSG00000136143		TCA	.	.	0.369176
ABCD1	ENSG00000101986	SUOX	ENSG00000139531			.	.	0.123732
ABCD1	ENSG00000101986	SURF1	ENSG00000148290		RCC4	.	.	0.125454
ABCD1	ENSG00000101986	TAT	ENSG00000198650			.	.	0.331746
ABCD1	ENSG00000101986	TAZ	ENSG00000102125			.	.	0.082757
ABCD1	ENSG00000101986	TIMM8A	ENSG00000126953			.	.	0.125436
ABCD1	ENSG00000101986	TK2	ENSG00000166548			.	.	0.102732
ABCD1	ENSG00000101986	TP53	ENSG00000141510			.	.	0.249416
ABCD1	ENSG00000101986	UCP1	ENSG00000109424			.	.	0.529412
ABCD1	ENSG00000101986	UCP2	ENSG00000175567			.	.	0.531787
ABCD1	ENSG00000101986	UCP3	ENSG00000175564			.	.	0.705882
ABCD1	ENSG00000101986	UNG	ENSG00000076248			.	.	0.137777
ABCD1	ENSG00000101986	UQCRB	ENSG00000156467			.	.	0.181999
ABCD1	ENSG00000101986	UROS	ENSG00000188690			.	.	0.085179
ABCD1	ENSG00000101986	WFS1	ENSG00000109501			.	.	0.109776
ACADL	ENSG00000115361	AASS	ENSG00000008311			.	.	0.174101
ACADL	ENSG00000115361	ABAT	ENSG00000183044			.	.	0.133985
ACADL	ENSG00000115361	ABCB7	ENSG00000131269			.	.	0.261132
ACADL	ENSG00000115361	ABCD1	ENSG00000101986			.	.	0.139582
ACADL	ENSG00000115361	ACADM	ENSG00000117054			188	0.352494	0.192381	yes	cluster-1
ACADL	ENSG00000115361	ACADS	ENSG00000122971			146.5	0.335393	0.157932	yes	cluster-1
ACADL	ENSG00000115361	ACADSB	ENSG00000196177			131.1	0.327778	0.186758	yes	cluster-1
ACADL	ENSG00000115361	ACADVL	ENSG00000072778			173.3	0.346912	0.202335	yes	cluster-1
ACADL	ENSG00000115361	ACAT1	ENSG00000075239			1.3	0.011454	0.154816	yes	cluster-1
ACADL	ENSG00000115361	ACSL4	ENSG00000068366			5	0.103814	0.157393	yes	cluster-1
ACADL	ENSG00000115361	ACSL6	ENSG00000164398			3.3	0.075325	0.339561	yes	cluster-1
ACADL	ENSG00000115361	AGXT	ENSG00000172482			.	.	0.128488
ACADL	ENSG00000115361	ALAS2	ENSG00000158578			.	.	0.174022
ACADL	ENSG00000115361	ALDH18A1	ENSG00000059573			.	.	0.509343
ACADL	ENSG00000115361	ALDH2	ENSG00000111275			.	.	0.133612
ACADL	ENSG00000115361	ALDH4A1	ENSG00000159423			.	.	0.202404
ACADL	ENSG00000115361	ALDH5A1	ENSG00000112294			.	.	0.196539
ACADL	ENSG00000115361	ALDH6A1	ENSG00000119711			6.2	0.118563	0.524587	yes	cluster-3
ACADL	ENSG00000115361	AMACR	ENSG00000082196			.	.	0.174337
ACADL	ENSG00000115361	AMT	ENSG00000145020		GCC	.	.	0.212684
ACADL	ENSG00000115361	ATP7B	ENSG00000123191			.	.	0.105049
ACADL	ENSG00000115361	ATPAF2	ENSG00000171953			.	.	0.473057
ACADL	ENSG00000115361	AUH	ENSG00000148090			.	.	0.149605
ACADL	ENSG00000115361	BAX	ENSG00000087088			.	.	0.071429
ACADL	ENSG00000115361	BCKDHA	ENSG00000142046		BCKDH	.	.	0.125157
ACADL	ENSG00000115361	BCKDHB	ENSG00000083123		BCKDH	.	.	0.156053
ACADL	ENSG00000115361	BCL2	ENSG00000171791			.	.	0.141087
ACADL	ENSG00000115361	BCS1L	ENSG00000074582			.	.	0.198615
ACADL	ENSG00000115361	CASP8	ENSG00000064012			.	.	0.122997
ACADL	ENSG00000115361	CLN3	ENSG00000188603			.	.	0.069517
ACADL	ENSG00000115361	COX10	ENSG00000006695		RCC4	.	.	0.267817
ACADL	ENSG00000115361	COX15	ENSG00000014919		RCC4	.	.	0.258764
ACADL	ENSG00000115361	CPOX	ENSG00000080819			.	.	0.185101
ACADL	ENSG00000115361	CPS1	ENSG00000021826		UC	.	.	0.162077
ACADL	ENSG00000115361	CPT1A	ENSG00000110090			5.8	0.11399	0.251903	yes	cluster-1
ACADL	ENSG00000115361	CPT2	ENSG00000157184			3.1	0.071038	0.12169	yes	cluster-1
ACADL	ENSG00000115361	CYB5A	ENSG00000166347			.	.	0.25
ACADL	ENSG00000115361	CYB5R3	ENSG00000100243			.	.	0.087876
ACADL	ENSG00000115361	CYBA	ENSG00000051523			.	.	0.073248
ACADL	ENSG00000115361	CYBB	ENSG00000165168			.	.	0.158385
ACADL	ENSG00000115361	CYP11A1	ENSG00000140459			.	.	0.204943
ACADL	ENSG00000115361	CYP11B1	ENSG00000160882			.	.	0.166483
ACADL	ENSG00000115361	CYP11B2	ENSG00000179142			.	.	0.127573
ACADL	ENSG00000115361	CYP27A1	ENSG00000135929			.	.	0.133254
ACADL	ENSG00000115361	CYP27B1	ENSG00000111012			.	.	0.30557
ACADL	ENSG00000115361	DBT	ENSG00000137992		BCKDH	0.7	.	0.170708
ACADL	ENSG00000115361	DGUOK	ENSG00000114956			.	.	0.298075
ACADL	ENSG00000115361	DLAT	ENSG00000150768		PDH	.	.	0.182715
ACADL	ENSG00000115361	DLD	ENSG00000091140		AKDH;BCKDH;GCC;PDH;TCA	.	.	0.174061
ACADL	ENSG00000115361	DLST	ENSG00000119689		AKDH;TCA	.	.	0.195218
ACADL	ENSG00000115361	DMGDH	ENSG00000132837			.	.	0.313342
ACADL	ENSG00000115361	DMPK	ENSG00000104936			.	.	0.064694
ACADL	ENSG00000115361	DNAJC19	ENSG00000205981			.	.	0.525645
ACADL	ENSG00000115361	ECGF1	ENSG00000025708			.	.	0.16832
ACADL	ENSG00000115361	ETFA	ENSG00000140374			.	.	0.210573
ACADL	ENSG00000115361	ETFB	ENSG00000105379			.	.	0.150076
ACADL	ENSG00000115361	ETFDH	ENSG00000171503			.	.	0.223384
ACADL	ENSG00000115361	ETHE1	ENSG00000105755			.	.	0.245865
ACADL	ENSG00000115361	FECH	ENSG00000066926			.	.	0.206906
ACADL	ENSG00000115361	FH	ENSG00000091483		TCA	.	.	0.106533
ACADL	ENSG00000115361	FXN	ENSG00000165060			.	.	0.351824
ACADL	ENSG00000115361	GATM	ENSG00000171766			.	.	0.176844
ACADL	ENSG00000115361	GCDH	ENSG00000105607			21.4	0.203502	0.159601	yes	cluster-1
ACADL	ENSG00000115361	GCK	ENSG00000106633			.	.	0.348832
ACADL	ENSG00000115361	GCSH	ENSG00000140905		GCC	.	.	0.23753
ACADL	ENSG00000115361	GDAP1	ENSG00000104381			.	.	0.341257
ACADL	ENSG00000115361	GFM1	ENSG00000168827			.	.	0.321198
ACADL	ENSG00000115361	GK	ENSG00000198814			.	.	0.281019
ACADL	ENSG00000115361	GLDC	ENSG00000178445		GCC	.	.	0.161981
ACADL	ENSG00000115361	GLUD1	ENSG00000148672			.	.	0.435017
ACADL	ENSG00000115361	GPD2	ENSG00000115159			.	.	0.789278
ACADL	ENSG00000115361	HADH	ENSG00000138796			.	.	0.217458
ACADL	ENSG00000115361	HADHA	ENSG00000084754			15	0.179139	0.193762	yes	cluster-1
ACADL	ENSG00000115361	HADHB	ENSG00000138029			16.5	0.185673	0.207619	yes	cluster-1
ACADL	ENSG00000115361	HD	ENSG00000197386			.	.	0.135058
ACADL	ENSG00000115361	HK1	ENSG00000156515			.	.	0.18865
ACADL	ENSG00000115361	HLCS	ENSG00000159267			.	.	0.175753
ACADL	ENSG00000115361	HMGCL	ENSG00000117305			.	.	0.383848
ACADL	ENSG00000115361	HMGCS2	ENSG00000134240			.	.	0.383124
ACADL	ENSG00000115361	HSD17B10	ENSG00000072506			.	.	0.219331
ACADL	ENSG00000115361	HSD3B2	ENSG00000203859			.	.	0.155596
ACADL	ENSG00000115361	HSPD1	ENSG00000144381			.	.	0.362576
ACADL	ENSG00000115361	HTRA2	ENSG00000115317			.	.	1
ACADL	ENSG00000115361	IVD	ENSG00000128928			.	.	0.214918
ACADL	ENSG00000115361	KIF1B	ENSG00000054523			.	.	0.488047
ACADL	ENSG00000115361	LRPPRC	ENSG00000138095			.	.	0.345997
ACADL	ENSG00000115361	LRRK2	ENSG00000188906			.	.	0.700912
ACADL	ENSG00000115361	MAOA	ENSG00000189221			.	.	0.144678
ACADL	ENSG00000115361	MCCC1	ENSG00000078070			2	0.04099	0.165274	yes	cluster-1
ACADL	ENSG00000115361	MCCC2	ENSG00000131844			2.1	0.044335	0.175468	yes	cluster-1
ACADL	ENSG00000115361	ME2	ENSG00000082212			.	.	0.289374
ACADL	ENSG00000115361	MFN2	ENSG00000116688			.	.	0.436484
ACADL	ENSG00000115361	MLYCD	ENSG00000103150			.	.	0.219689
ACADL	ENSG00000115361	MMAA	ENSG00000151611			.	.	0.199044
ACADL	ENSG00000115361	MMAB	ENSG00000139428			.	.	0.265175
ACADL	ENSG00000115361	MPV17	ENSG00000115204			.	.	0.32392
ACADL	ENSG00000115361	MRPS16	ENSG00000182180			.	.	0.480418
ACADL	ENSG00000115361	MTCP1	ENSG00000182712			.	.	0.09375
ACADL	ENSG00000115361	MTHFD1	ENSG00000100714			.	.	0.176954
ACADL	ENSG00000115361	MTRR	ENSG00000124275			.	.	0.092235
ACADL	ENSG00000115361	MUT	ENSG00000146085			.	.	0.180235
ACADL	ENSG00000115361	NAGS	ENSG00000161653		UC	.	.	0.249845
ACADL	ENSG00000115361	NDUFA12L	ENSG00000164182		RCC1	.	.	0.435861
ACADL	ENSG00000115361	NDUFS1	ENSG00000023228		RCC1	.	.	0.248534
ACADL	ENSG00000115361	NDUFS2	ENSG00000158864		RCC1	.	.	0.282346
ACADL	ENSG00000115361	NDUFS3	ENSG00000110536		RCC1	.	.	0.409974
ACADL	ENSG00000115361	NDUFS4	ENSG00000164258		RCC1	.	.	0.285281
ACADL	ENSG00000115361	NDUFS6	ENSG00000145494		RCC1	.	.	0.502535
ACADL	ENSG00000115361	NDUFS7	ENSG00000115286		RCC1	.	.	0.259925
ACADL	ENSG00000115361	NDUFS8	ENSG00000110717		RCC1	.	.	0.27085
ACADL	ENSG00000115361	NDUFV1	ENSG00000167792		RCC1	.	.	0.255079
ACADL	ENSG00000115361	NDUFV2	ENSG00000178127		RCC1	.	.	0.187188
ACADL	ENSG00000115361	OAT	ENSG00000065154			.	.	0.141805
ACADL	ENSG00000115361	OGDH	ENSG00000105953		AKDH;TCA	.	.	0.323203
ACADL	ENSG00000115361	OPA1	ENSG00000198836			.	.	0.061081
ACADL	ENSG00000115361	OPA3	ENSG00000125741			.	.	0.400394
ACADL	ENSG00000115361	OTC	ENSG00000036473		UC	.	.	0.132868
ACADL	ENSG00000115361	OXCT1	ENSG00000083720			.	.	0.18825
ACADL	ENSG00000115361	PANK2	ENSG00000125779			.	.	0.239223
ACADL	ENSG00000115361	PARK7	ENSG00000116288			.	.	0.249654
ACADL	ENSG00000115361	PARL	ENSG00000175193			.	.	0.789278
ACADL	ENSG00000115361	PC	ENSG00000173599			.	.	0.138787
ACADL	ENSG00000115361	PCCA	ENSG00000175198			3.1	0.071038	0.140395	yes	cluster-1
ACADL	ENSG00000115361	PCCB	ENSG00000114054			3.9	0.086779	0.14011	yes	cluster-1
ACADL	ENSG00000115361	PCK2	ENSG00000100889			.	.	0.728821
ACADL	ENSG00000115361	PDHA1	ENSG00000131828		PDH;TCA	.	.	0.110252
ACADL	ENSG00000115361	PDHB	ENSG00000168291		PDH	.	.	0.466245
ACADL	ENSG00000115361	PDHX	ENSG00000110435		PDH	.	.	0.128663
ACADL	ENSG00000115361	PEO1	ENSG00000107815			.	.	0.119217
ACADL	ENSG00000115361	PINK1	ENSG00000158828			.	.	0.367404
ACADL	ENSG00000115361	POLG	ENSG00000140521			.	.	0.097432
ACADL	ENSG00000115361	POLG2	ENSG00000136480			.	.	0.412948
ACADL	ENSG00000115361	PPOX	ENSG00000143224			.	.	0.159571
ACADL	ENSG00000115361	PRODH	ENSG00000100033			.	.	0.399448
ACADL	ENSG00000115361	PUS1	ENSG00000177192			.	.	0.218971
ACADL	ENSG00000115361	RMRP	ENSG00000199916			.	.	0.159607
ACADL	ENSG00000115361	SCO1	ENSG00000133028		RCC4	.	.	0.593835
ACADL	ENSG00000115361	SCO2	ENSG00000130489		RCC4	.	.	0.388631
ACADL	ENSG00000115361	SDHA	ENSG00000073578		RCC2;TCA	.	.	0.08218
ACADL	ENSG00000115361	SDHB	ENSG00000117118		RCC2;TCA	.	.	0.179684
ACADL	ENSG00000115361	SDHC	ENSG00000143252		RCC2;TCA	.	.	0.094576
ACADL	ENSG00000115361	SDHD	ENSG00000204370		RCC2;TCA	.	.	0.097895
ACADL	ENSG00000115361	SLC19A2	ENSG00000117479			.	.	0.328192
ACADL	ENSG00000115361	SLC25A13	ENSG00000004864		UC	.	.	0.134481
ACADL	ENSG00000115361	SLC25A15	ENSG00000102743		UC	.	.	0.121601
ACADL	ENSG00000115361	SLC25A16	ENSG00000122912			.	.	0.41752
ACADL	ENSG00000115361	SLC25A19	ENSG00000125454			.	.	0.441657
ACADL	ENSG00000115361	SLC25A20	ENSG00000178537			.	.	0.271514
ACADL	ENSG00000115361	SLC25A22	ENSG00000177542			.	.	0.280782
ACADL	ENSG00000115361	SLC25A4	ENSG00000151729			.	.	0.137023
ACADL	ENSG00000115361	SOD1	ENSG00000142168			.	.	0.259522
ACADL	ENSG00000115361	SPAST	ENSG00000021574			.	.	0.248537
ACADL	ENSG00000115361	SPG7	ENSG00000197912			.	.	0.171689
ACADL	ENSG00000115361	STAR	ENSG00000147465			.	.	0.25923
ACADL	ENSG00000115361	SUCLA2	ENSG00000136143		TCA	.	.	0.468607
ACADL	ENSG00000115361	SUOX	ENSG00000139531			.	.	0.15599
ACADL	ENSG00000115361	SURF1	ENSG00000148290		RCC4	.	.	0.188213
ACADL	ENSG00000115361	TAT	ENSG00000198650			.	.	0.238436
ACADL	ENSG00000115361	TAZ	ENSG00000102125			.	.	0.345408
ACADL	ENSG00000115361	TIMM8A	ENSG00000126953			.	.	0.197169
ACADL	ENSG00000115361	TK2	ENSG00000166548			.	.	0.175804
ACADL	ENSG00000115361	TP53	ENSG00000141510			.	.	0.028599
ACADL	ENSG00000115361	UCP1	ENSG00000109424			.	.	0.389237
ACADL	ENSG00000115361	UCP2	ENSG00000175567			.	.	0.481915
ACADL	ENSG00000115361	UCP3	ENSG00000175564			.	.	0.544725
ACADL	ENSG00000115361	UNG	ENSG00000076248			.	.	0.25
ACADL	ENSG00000115361	UQCRB	ENSG00000156467			.	.	0.664037
ACADL	ENSG00000115361	UROS	ENSG00000188690			.	.	0.189936
ACADL	ENSG00000115361	WFS1	ENSG00000109501			.	.	0.302606
ACADM	ENSG00000117054	AASS	ENSG00000008311			.	.	0.131445
ACADM	ENSG00000117054	ABAT	ENSG00000183044			.	.	0.082528
ACADM	ENSG00000117054	ABCB7	ENSG00000131269			.	.	0.115929
ACADM	ENSG00000117054	ABCD1	ENSG00000101986			.	.	0.086839
ACADM	ENSG00000117054	ACADL	ENSG00000115361			188	0.352494	0.192381	yes	cluster-1
ACADM	ENSG00000117054	ACADS	ENSG00000122971			328.1	0.390675	0.134249	yes	cluster-1
ACADM	ENSG00000117054	ACADSB	ENSG00000196177			461.5	0.414067	0.290318	yes	cluster-1
ACADM	ENSG00000117054	ACADVL	ENSG00000072778			342.1	0.39354	0.126924	yes	cluster-1
ACADM	ENSG00000117054	ACAT1	ENSG00000075239			7.9	0.135177	0.140241	yes	cluster-1
ACADM	ENSG00000117054	ACSL4	ENSG00000068366			14.2	0.175381	0.203496	yes	cluster-1
ACADM	ENSG00000117054	ACSL6	ENSG00000164398			3	0.06879	0.134881	yes	cluster-1
ACADM	ENSG00000117054	AGXT	ENSG00000172482			.	.	0.050807
ACADM	ENSG00000117054	ALAS2	ENSG00000158578			.	.	0.106034
ACADM	ENSG00000117054	ALDH18A1	ENSG00000059573			.	.	0.260858
ACADM	ENSG00000117054	ALDH2	ENSG00000111275			.	.	0.025489
ACADM	ENSG00000117054	ALDH4A1	ENSG00000159423			.	.	0.178597
ACADM	ENSG00000117054	ALDH5A1	ENSG00000112294			.	.	0.15823
ACADM	ENSG00000117054	ALDH6A1	ENSG00000119711			18	0.191639	0.587156	yes	cluster-3
ACADM	ENSG00000117054	AMACR	ENSG00000082196			.	.	0.106157
ACADM	ENSG00000117054	AMT	ENSG00000145020		GCC	.	.	0.171575
ACADM	ENSG00000117054	ATP7B	ENSG00000123191			.	.	0.063709
ACADM	ENSG00000117054	ATPAF2	ENSG00000171953			.	.	0.265701
ACADM	ENSG00000117054	AUH	ENSG00000148090			.	.	0.137629
ACADM	ENSG00000117054	BAX	ENSG00000087088			.	.	0.057143
ACADM	ENSG00000117054	BCKDHA	ENSG00000142046		BCKDH	.	.	0.132565
ACADM	ENSG00000117054	BCKDHB	ENSG00000083123		BCKDH	.	.	0.143154
ACADM	ENSG00000117054	BCL2	ENSG00000171791			.	.	0.056663
ACADM	ENSG00000117054	BCS1L	ENSG00000074582			.	.	0.08057
ACADM	ENSG00000117054	CASP8	ENSG00000064012			.	.	0.097036
ACADM	ENSG00000117054	CLN3	ENSG00000188603			.	.	0.106409
ACADM	ENSG00000117054	COX10	ENSG00000006695		RCC4	.	.	0.204361
ACADM	ENSG00000117054	COX15	ENSG00000014919		RCC4	.	.	0.253789
ACADM	ENSG00000117054	CPOX	ENSG00000080819			118.8	0.321023	0.126633	yes	cluster-1
ACADM	ENSG00000117054	CPS1	ENSG00000021826		UC	.	.	0.131804
ACADM	ENSG00000117054	CPT1A	ENSG00000110090			179.6	0.34936	0.154221	yes	cluster-1
ACADM	ENSG00000117054	CPT2	ENSG00000157184			68.3	0.283071	0.063242	yes	cluster-1
ACADM	ENSG00000117054	CYB5A	ENSG00000166347			.	.	0.2
ACADM	ENSG00000117054	CYB5R3	ENSG00000100243			.	.	0.110099
ACADM	ENSG00000117054	CYBA	ENSG00000051523			.	.	0.04303
ACADM	ENSG00000117054	CYBB	ENSG00000165168			.	.	0.152329
ACADM	ENSG00000117054	CYP11A1	ENSG00000140459			.	.	0.155572
ACADM	ENSG00000117054	CYP11B1	ENSG00000160882			.	.	0.290258
ACADM	ENSG00000117054	CYP11B2	ENSG00000179142			.	.	0.081077
ACADM	ENSG00000117054	CYP27A1	ENSG00000135929			.	.	0.121457
ACADM	ENSG00000117054	CYP27B1	ENSG00000111012			.	.	0.083197
ACADM	ENSG00000117054	DBT	ENSG00000137992		BCKDH	0.8	.	0.134454
ACADM	ENSG00000117054	DGUOK	ENSG00000114956			.	.	0.162988
ACADM	ENSG00000117054	DLAT	ENSG00000150768		PDH	.	.	0.164821
ACADM	ENSG00000117054	DLD	ENSG00000091140		AKDH;BCKDH;GCC;PDH;TCA	101.6	0.3103	0.108995	yes	cluster-1
ACADM	ENSG00000117054	DLST	ENSG00000119689		AKDH;TCA	.	.	0.152384
ACADM	ENSG00000117054	DMGDH	ENSG00000132837			.	.	0.261361
ACADM	ENSG00000117054	DMPK	ENSG00000104936			.	.	0.062627
ACADM	ENSG00000117054	DNAJC19	ENSG00000205981			.	.	0.443554
ACADM	ENSG00000117054	ECGF1	ENSG00000025708			.	.	0.125999
ACADM	ENSG00000117054	ETFA	ENSG00000140374			.	.	0.130596
ACADM	ENSG00000117054	ETFB	ENSG00000105379			.	.	0.154684
ACADM	ENSG00000117054	ETFDH	ENSG00000171503			.	.	0.153528
ACADM	ENSG00000117054	ETHE1	ENSG00000105755			.	.	0.176214
ACADM	ENSG00000117054	FECH	ENSG00000066926			.	.	0.060062
ACADM	ENSG00000117054	FH	ENSG00000091483		TCA	.	.	0.07854
ACADM	ENSG00000117054	FXN	ENSG00000165060			.	.	0.172901
ACADM	ENSG00000117054	GATM	ENSG00000171766			.	.	0.399638
ACADM	ENSG00000117054	GCDH	ENSG00000105607			91.3	0.302971	0.134386	yes	cluster-1
ACADM	ENSG00000117054	GCK	ENSG00000106633			.	.	0.232974
ACADM	ENSG00000117054	GCSH	ENSG00000140905		GCC	.	.	0.16457
ACADM	ENSG00000117054	GDAP1	ENSG00000104381			.	.	0.156966
ACADM	ENSG00000117054	GFM1	ENSG00000168827			.	.	0.36636
ACADM	ENSG00000117054	GK	ENSG00000198814			.	.	0.135065
ACADM	ENSG00000117054	GLDC	ENSG00000178445		GCC	.	.	0.136413
ACADM	ENSG00000117054	GLUD1	ENSG00000148672			.	.	0.229104
ACADM	ENSG00000117054	GPD2	ENSG00000115159			.	.	0.611957
ACADM	ENSG00000117054	HADH	ENSG00000138796			51.6	0.263847	0.193218	yes	cluster-1
ACADM	ENSG00000117054	HADHA	ENSG00000084754			54.4	0.26747	0.091858	yes	cluster-1
ACADM	ENSG00000117054	HADHB	ENSG00000138029			1830.3	0.50853	0.145056	yes	cluster-1
ACADM	ENSG00000117054	HD	ENSG00000197386			.	.	0.075384
ACADM	ENSG00000117054	HK1	ENSG00000156515			.	.	0.115569
ACADM	ENSG00000117054	HLCS	ENSG00000159267			.	.	0.142649
ACADM	ENSG00000117054	HMGCL	ENSG00000117305			.	.	0.173325
ACADM	ENSG00000117054	HMGCS2	ENSG00000134240			.	.	0.210133
ACADM	ENSG00000117054	HSD17B10	ENSG00000072506			.	.	0.230967
ACADM	ENSG00000117054	HSD3B2	ENSG00000203859			.	.	0.09745
ACADM	ENSG00000117054	HSPD1	ENSG00000144381			.	.	0.234606
ACADM	ENSG00000117054	HTRA2	ENSG00000115317			.	.	0.209356
ACADM	ENSG00000117054	IVD	ENSG00000128928			.	.	0.19265
ACADM	ENSG00000117054	KIF1B	ENSG00000054523			.	.	0.255392
ACADM	ENSG00000117054	LRPPRC	ENSG00000138095			.	.	0.302745
ACADM	ENSG00000117054	LRRK2	ENSG00000188906			.	.	0.139702
ACADM	ENSG00000117054	MAOA	ENSG00000189221			.	.	0.194021
ACADM	ENSG00000117054	MCCC1	ENSG00000078070			5.7	0.112798	0.25594	yes	cluster-1
ACADM	ENSG00000117054	MCCC2	ENSG00000131844			10.4	0.154028	0.181115	yes	cluster-1
ACADM	ENSG00000117054	ME2	ENSG00000082212			56.7	0.270309	0.339008	yes	cluster-1
ACADM	ENSG00000117054	MFN2	ENSG00000116688			.	.	0.198852
ACADM	ENSG00000117054	MLYCD	ENSG00000103150			.	.	0.186579
ACADM	ENSG00000117054	MMAA	ENSG00000151611			.	.	0.163569
ACADM	ENSG00000117054	MMAB	ENSG00000139428			.	.	0.172101
ACADM	ENSG00000117054	MPV17	ENSG00000115204			.	.	0.161643
ACADM	ENSG00000117054	MRPS16	ENSG00000182180			.	.	0.430091
ACADM	ENSG00000117054	MTCP1	ENSG00000182712			.	.	0.075
ACADM	ENSG00000117054	MTHFD1	ENSG00000100714			.	.	0.057526
ACADM	ENSG00000117054	MTRR	ENSG00000124275			.	.	0.072747
ACADM	ENSG00000117054	MUT	ENSG00000146085			.	.	0.166658
ACADM	ENSG00000117054	NAGS	ENSG00000161653		UC	.	.	0.147775
ACADM	ENSG00000117054	NDUFA12L	ENSG00000164182		RCC1	.	.	0.31017
ACADM	ENSG00000117054	NDUFS1	ENSG00000023228		RCC1	101.6	0.3103	0.225391	yes	cluster-1
ACADM	ENSG00000117054	NDUFS2	ENSG00000158864		RCC1	55.5	0.268842	0.219762	yes	cluster-1
ACADM	ENSG00000117054	NDUFS3	ENSG00000110536		RCC1	.	.	0.428941
ACADM	ENSG00000117054	NDUFS4	ENSG00000164258		RCC1	93.1	0.30431	0.168362	yes	cluster-1
ACADM	ENSG00000117054	NDUFS6	ENSG00000145494		RCC1	.	.	0.418559
ACADM	ENSG00000117054	NDUFS7	ENSG00000115286		RCC1	.	.	0.229133
ACADM	ENSG00000117054	NDUFS8	ENSG00000110717		RCC1	.	.	0.149171
ACADM	ENSG00000117054	NDUFV1	ENSG00000167792		RCC1	.	.	0.258845
ACADM	ENSG00000117054	NDUFV2	ENSG00000178127		RCC1	46.2	0.256268	0.131689	yes	cluster-1
ACADM	ENSG00000117054	OAT	ENSG00000065154			.	.	0.099228
ACADM	ENSG00000117054	OGDH	ENSG00000105953		AKDH;TCA	52.6	0.265163	0.191304	yes	cluster-1
ACADM	ENSG00000117054	OPA1	ENSG00000198836			.	.	0.044018
ACADM	ENSG00000117054	OPA3	ENSG00000125741			.	.	0.350342
ACADM	ENSG00000117054	OTC	ENSG00000036473		UC	.	.	0.098038
ACADM	ENSG00000117054	OXCT1	ENSG00000083720			.	.	0.131309
ACADM	ENSG00000117054	PANK2	ENSG00000125779			.	.	0.175253
ACADM	ENSG00000117054	PARK7	ENSG00000116288			.	.	0.128354
ACADM	ENSG00000117054	PARL	ENSG00000175193			.	.	0.611957
ACADM	ENSG00000117054	PC	ENSG00000173599			.	.	0.108144
ACADM	ENSG00000117054	PCCA	ENSG00000175198			3	0.06879	0.139466	yes	cluster-1
ACADM	ENSG00000117054	PCCB	ENSG00000114054			23	0.208446	0.118551	yes	cluster-1
ACADM	ENSG00000117054	PCK2	ENSG00000100889			.	.	0.565694
ACADM	ENSG00000117054	PDHA1	ENSG00000131828		PDH;TCA	48.8	0.260022	0.097441	yes	cluster-1
ACADM	ENSG00000117054	PDHB	ENSG00000168291		PDH	208.1	0.359458	0.515751	yes	cluster-3
ACADM	ENSG00000117054	PDHX	ENSG00000110435		PDH	.	.	0.121206
ACADM	ENSG00000117054	PEO1	ENSG00000107815			.	.	0.068558
ACADM	ENSG00000117054	PINK1	ENSG00000158828			.	.	0.107732
ACADM	ENSG00000117054	POLG	ENSG00000140521			.	.	0.071405
ACADM	ENSG00000117054	POLG2	ENSG00000136480			.	.	0.307241
ACADM	ENSG00000117054	PPOX	ENSG00000143224			.	.	0.136956
ACADM	ENSG00000117054	PRODH	ENSG00000100033			.	.	0.113356
ACADM	ENSG00000117054	PUS1	ENSG00000177192			.	.	0.132177
ACADM	ENSG00000117054	RMRP	ENSG00000199916			.	.	0.093226
ACADM	ENSG00000117054	SCO1	ENSG00000133028		RCC4	.	.	0.417728
ACADM	ENSG00000117054	SCO2	ENSG00000130489		RCC4	.	.	0.287056
ACADM	ENSG00000117054	SDHA	ENSG00000073578		RCC2;TCA	82.9	0.296354	0.05705	yes	cluster-1
ACADM	ENSG00000117054	SDHB	ENSG00000117118		RCC2;TCA	125.6	0.32484	0.096562	yes	cluster-1
ACADM	ENSG00000117054	SDHC	ENSG00000143252		RCC2;TCA	150.6	0.337286	0.056192	yes	cluster-1
ACADM	ENSG00000117054	SDHD	ENSG00000204370		RCC2;TCA	.	.	0.088349
ACADM	ENSG00000117054	SLC19A2	ENSG00000117479			.	.	0.144824
ACADM	ENSG00000117054	SLC25A13	ENSG00000004864		UC	.	.	0.12153
ACADM	ENSG00000117054	SLC25A15	ENSG00000102743		UC	.	.	0.10383
ACADM	ENSG00000117054	SLC25A16	ENSG00000122912			.	.	0.296146
ACADM	ENSG00000117054	SLC25A19	ENSG00000125454			.	.	0.273968
ACADM	ENSG00000117054	SLC25A20	ENSG00000178537			.	.	0.191876
ACADM	ENSG00000117054	SLC25A22	ENSG00000177542			.	.	0.186058
ACADM	ENSG00000117054	SLC25A4	ENSG00000151729			.	.	0.091622
ACADM	ENSG00000117054	SOD1	ENSG00000142168			75.8	0.290215	0.031779	yes	cluster-1
ACADM	ENSG00000117054	SPAST	ENSG00000021574			.	.	0.0983
ACADM	ENSG00000117054	SPG7	ENSG00000197912			.	.	0.12295
ACADM	ENSG00000117054	STAR	ENSG00000147465			.	.	0.140791
ACADM	ENSG00000117054	SUCLA2	ENSG00000136143		TCA	57.2	0.270911	0.263462	yes	cluster-1
ACADM	ENSG00000117054	SUOX	ENSG00000139531			.	.	0.103698
ACADM	ENSG00000117054	SURF1	ENSG00000148290		RCC4	.	.	0.093511
ACADM	ENSG00000117054	TAT	ENSG00000198650			.	.	0.284338
ACADM	ENSG00000117054	TAZ	ENSG00000102125			.	.	0.22609
ACADM	ENSG00000117054	TIMM8A	ENSG00000126953			.	.	0.073528
ACADM	ENSG00000117054	TK2	ENSG00000166548			.	.	0.148702
ACADM	ENSG00000117054	TP53	ENSG00000141510			.	.	0.039142
ACADM	ENSG00000117054	UCP1	ENSG00000109424			.	.	0.373192
ACADM	ENSG00000117054	UCP2	ENSG00000175567			.	.	0.438619
ACADM	ENSG00000117054	UCP3	ENSG00000175564			.	.	0.485694
ACADM	ENSG00000117054	UNG	ENSG00000076248			.	.	0.252012
ACADM	ENSG00000117054	UQCRB	ENSG00000156467			71.5	0.286211	0.211422	yes	cluster-1
ACADM	ENSG00000117054	UROS	ENSG00000188690			.	.	0.092381
ACADM	ENSG00000117054	WFS1	ENSG00000109501			.	.	0.217165
ACADS	ENSG00000122971	AASS	ENSG00000008311			.	.	0.118817
ACADS	ENSG00000122971	ABAT	ENSG00000183044			.	.	0.138788
ACADS	ENSG00000122971	ABCB7	ENSG00000131269			.	.	0.126618
ACADS	ENSG00000122971	ABCD1	ENSG00000101986			.	.	0.07077
ACADS	ENSG00000122971	ACADL	ENSG00000115361			146.5	0.335393	0.157932	yes	cluster-1
ACADS	ENSG00000122971	ACADM	ENSG00000117054			328.1	0.390675	0.134249	yes	cluster-1
ACADS	ENSG00000122971	ACADSB	ENSG00000196177			142.3	0.333399	0.170824	yes	cluster-1
ACADS	ENSG00000122971	ACADVL	ENSG00000072778			476.4	0.416245	0.116161	yes	cluster-1
ACADS	ENSG00000122971	ACAT1	ENSG00000075239			1	.	0.229027
ACADS	ENSG00000122971	ACSL4	ENSG00000068366			.	.	0.135592
ACADS	ENSG00000122971	ACSL6	ENSG00000164398			.	.	0.149102
ACADS	ENSG00000122971	AGXT	ENSG00000172482			.	.	0.12172
ACADS	ENSG00000122971	ALAS2	ENSG00000158578			.	.	0.087494
ACADS	ENSG00000122971	ALDH18A1	ENSG00000059573			.	.	0.257134
ACADS	ENSG00000122971	ALDH2	ENSG00000111275			.	.	0.023015
ACADS	ENSG00000122971	ALDH4A1	ENSG00000159423			.	.	0.264102
ACADS	ENSG00000122971	ALDH5A1	ENSG00000112294			.	.	0.295593
ACADS	ENSG00000122971	ALDH6A1	ENSG00000119711			.	.	0.573552
ACADS	ENSG00000122971	AMACR	ENSG00000082196			.	.	0.070071
ACADS	ENSG00000122971	AMT	ENSG00000145020		GCC	.	.	0.194635
ACADS	ENSG00000122971	ATP7B	ENSG00000123191			.	.	0.038515
ACADS	ENSG00000122971	ATPAF2	ENSG00000171953			.	.	0.210718
ACADS	ENSG00000122971	AUH	ENSG00000148090			.	.	0.243657
ACADS	ENSG00000122971	BAX	ENSG00000087088			.	.	0.021978
ACADS	ENSG00000122971	BCKDHA	ENSG00000142046		BCKDH	.	.	0.115679
ACADS	ENSG00000122971	BCKDHB	ENSG00000083123		BCKDH	.	.	0.154867
ACADS	ENSG00000122971	BCL2	ENSG00000171791			.	.	0.032391
ACADS	ENSG00000122971	BCS1L	ENSG00000074582			.	.	0.165228
ACADS	ENSG00000122971	CASP8	ENSG00000064012			.	.	0.077559
ACADS	ENSG00000122971	CLN3	ENSG00000188603			.	.	0.07731
ACADS	ENSG00000122971	COX10	ENSG00000006695		RCC4	.	.	0.167067
ACADS	ENSG00000122971	COX15	ENSG00000014919		RCC4	.	.	0.195685
ACADS	ENSG00000122971	CPOX	ENSG00000080819			.	.	0.115756
ACADS	ENSG00000122971	CPS1	ENSG00000021826		UC	.	.	0.131963
ACADS	ENSG00000122971	CPT1A	ENSG00000110090			45.5	0.255221	0.144571	yes	cluster-1
ACADS	ENSG00000122971	CPT2	ENSG00000157184			47.5	0.25817	0.072293	yes	cluster-1
ACADS	ENSG00000122971	CYB5A	ENSG00000166347			.	.	0.076923
ACADS	ENSG00000122971	CYB5R3	ENSG00000100243			.	.	0.054367
ACADS	ENSG00000122971	CYBA	ENSG00000051523			.	.	0.106507
ACADS	ENSG00000122971	CYBB	ENSG00000165168			.	.	0.125074
ACADS	ENSG00000122971	CYP11A1	ENSG00000140459			.	.	0.127965
ACADS	ENSG00000122971	CYP11B1	ENSG00000160882			.	.	0.018339
ACADS	ENSG00000122971	CYP11B2	ENSG00000179142			.	.	0.07918
ACADS	ENSG00000122971	CYP27A1	ENSG00000135929			.	.	0.102789
ACADS	ENSG00000122971	CYP27B1	ENSG00000111012			.	.	0.126388
ACADS	ENSG00000122971	DBT	ENSG00000137992		BCKDH	0.7	.	0.169881
ACADS	ENSG00000122971	DGUOK	ENSG00000114956			.	.	0.152181
ACADS	ENSG00000122971	DLAT	ENSG00000150768		PDH	.	.	0.066357
ACADS	ENSG00000122971	DLD	ENSG00000091140		AKDH;BCKDH;GCC;PDH;TCA	.	.	0.177244
ACADS	ENSG00000122971	DLST	ENSG00000119689		AKDH;TCA	.	.	0.279926
ACADS	ENSG00000122971	DMGDH	ENSG00000132837			.	.	0.181602
ACADS	ENSG00000122971	DMPK	ENSG00000104936			.	.	0.061882
ACADS	ENSG00000122971	DNAJC19	ENSG00000205981			.	.	0.378544
ACADS	ENSG00000122971	ECGF1	ENSG00000025708			.	.	0.145433
ACADS	ENSG00000122971	ETFA	ENSG00000140374			.	.	0.231731
ACADS	ENSG00000122971	ETFB	ENSG00000105379			.	.	0.203629
ACADS	ENSG00000122971	ETFDH	ENSG00000171503			.	.	0.217563
ACADS	ENSG00000122971	ETHE1	ENSG00000105755			.	.	0.528756
ACADS	ENSG00000122971	FECH	ENSG00000066926			.	.	0.071468
ACADS	ENSG00000122971	FH	ENSG00000091483		TCA	.	.	0.097896
ACADS	ENSG00000122971	FXN	ENSG00000165060			.	.	0.073685
ACADS	ENSG00000122971	GATM	ENSG00000171766			.	.	0.241903
ACADS	ENSG00000122971	GCDH	ENSG00000105607			28.1	0.222177	0.213062	yes	cluster-1
ACADS	ENSG00000122971	GCK	ENSG00000106633			.	.	0.162863
ACADS	ENSG00000122971	GCSH	ENSG00000140905		GCC	.	.	0.174316
ACADS	ENSG00000122971	GDAP1	ENSG00000104381			.	.	0.140119
ACADS	ENSG00000122971	GFM1	ENSG00000168827			.	.	0.177827
ACADS	ENSG00000122971	GK	ENSG00000198814			.	.	0.234325
ACADS	ENSG00000122971	GLDC	ENSG00000178445		GCC	.	.	0.13258
ACADS	ENSG00000122971	GLUD1	ENSG00000148672			.	.	0.16738
ACADS	ENSG00000122971	GPD2	ENSG00000115159			.	.	0.520966
ACADS	ENSG00000122971	HADH	ENSG00000138796			.	.	0.190469
ACADS	ENSG00000122971	HADHA	ENSG00000084754			13.3	0.170891	0.106955	yes	cluster-1
ACADS	ENSG00000122971	HADHB	ENSG00000138029			73.5	0.288102	0.128425	yes	cluster-1
ACADS	ENSG00000122971	HD	ENSG00000197386			.	.	0.052621
ACADS	ENSG00000122971	HK1	ENSG00000156515			.	.	0.044149
ACADS	ENSG00000122971	HLCS	ENSG00000159267			.	.	0.237747
ACADS	ENSG00000122971	HMGCL	ENSG00000117305			.	.	0.18663
ACADS	ENSG00000122971	HMGCS2	ENSG00000134240			.	.	0.226388
ACADS	ENSG00000122971	HSD17B10	ENSG00000072506			.	.	0.237915
ACADS	ENSG00000122971	HSD3B2	ENSG00000203859			.	.	0.081816
ACADS	ENSG00000122971	HSPD1	ENSG00000144381			.	.	0.20143
ACADS	ENSG00000122971	HTRA2	ENSG00000115317			.	.	0.255149
ACADS	ENSG00000122971	IVD	ENSG00000128928			.	.	0.23459
ACADS	ENSG00000122971	KIF1B	ENSG00000054523			.	.	0.183284
ACADS	ENSG00000122971	LRPPRC	ENSG00000138095			.	.	0.213999
ACADS	ENSG00000122971	LRRK2	ENSG00000188906			.	.	0.379365
ACADS	ENSG00000122971	MAOA	ENSG00000189221			.	.	0.159053
ACADS	ENSG00000122971	MCCC1	ENSG00000078070			.	.	0.246005
ACADS	ENSG00000122971	MCCC2	ENSG00000131844			.	.	0.221121
ACADS	ENSG00000122971	ME2	ENSG00000082212			.	.	0.217866
ACADS	ENSG00000122971	MFN2	ENSG00000116688			.	.	0.117034
ACADS	ENSG00000122971	MLYCD	ENSG00000103150			.	.	0.284789
ACADS	ENSG00000122971	MMAA	ENSG00000151611			.	.	0.270153
ACADS	ENSG00000122971	MMAB	ENSG00000139428			.	.	0.236355
ACADS	ENSG00000122971	MPV17	ENSG00000115204			.	.	0.159559
ACADS	ENSG00000122971	MRPS16	ENSG00000182180			.	.	0.317683
ACADS	ENSG00000122971	MTCP1	ENSG00000182712			.	.	0.028846
ACADS	ENSG00000122971	MTHFD1	ENSG00000100714			.	.	0.047678
ACADS	ENSG00000122971	MTRR	ENSG00000124275			.	.	0.067562
ACADS	ENSG00000122971	MUT	ENSG00000146085			.	.	0.25691
ACADS	ENSG00000122971	NAGS	ENSG00000161653		UC	.	.	0.153825
ACADS	ENSG00000122971	NDUFA12L	ENSG00000164182		RCC1	.	.	0.234109
ACADS	ENSG00000122971	NDUFS1	ENSG00000023228		RCC1	.	.	0.197358
ACADS	ENSG00000122971	NDUFS2	ENSG00000158864		RCC1	.	.	0.125843
ACADS	ENSG00000122971	NDUFS3	ENSG00000110536		RCC1	.	.	0.258454
ACADS	ENSG00000122971	NDUFS4	ENSG00000164258		RCC1	.	.	0.130117
ACADS	ENSG00000122971	NDUFS6	ENSG00000145494		RCC1	.	.	0.264572
ACADS	ENSG00000122971	NDUFS7	ENSG00000115286		RCC1	.	.	0.195214
ACADS	ENSG00000122971	NDUFS8	ENSG00000110717		RCC1	.	.	0.115366
ACADS	ENSG00000122971	NDUFV1	ENSG00000167792		RCC1	.	.	0.175559
ACADS	ENSG00000122971	NDUFV2	ENSG00000178127		RCC1	.	.	0.126211
ACADS	ENSG00000122971	OAT	ENSG00000065154			.	.	0.118832
ACADS	ENSG00000122971	OGDH	ENSG00000105953		AKDH;TCA	.	.	0.544427
ACADS	ENSG00000122971	OPA1	ENSG00000198836			.	.	0.092565
ACADS	ENSG00000122971	OPA3	ENSG00000125741			.	.	0.467498
ACADS	ENSG00000122971	OTC	ENSG00000036473		UC	.	.	0.157571
ACADS	ENSG00000122971	OXCT1	ENSG00000083720			.	.	0.100899
ACADS	ENSG00000122971	PANK2	ENSG00000125779			.	.	0.158318
ACADS	ENSG00000122971	PARK7	ENSG00000116288			.	.	0.139668
ACADS	ENSG00000122971	PARL	ENSG00000175193			.	.	0.520966
ACADS	ENSG00000122971	PC	ENSG00000173599			.	.	0.061303
ACADS	ENSG00000122971	PCCA	ENSG00000175198			.	.	0.165233
ACADS	ENSG00000122971	PCCB	ENSG00000114054			.	.	0.136105
ACADS	ENSG00000122971	PCK2	ENSG00000100889			.	.	0.362979
ACADS	ENSG00000122971	PDHA1	ENSG00000131828		PDH;TCA	.	.	0.108164
ACADS	ENSG00000122971	PDHB	ENSG00000168291		PDH	.	.	0.387003
ACADS	ENSG00000122971	PDHX	ENSG00000110435		PDH	.	.	0.109209
ACADS	ENSG00000122971	PEO1	ENSG00000107815			.	.	0.105354
ACADS	ENSG00000122971	PINK1	ENSG00000158828			.	.	0.203934
ACADS	ENSG00000122971	POLG	ENSG00000140521			.	.	0.081113
ACADS	ENSG00000122971	POLG2	ENSG00000136480			.	.	0.200721
ACADS	ENSG00000122971	PPOX	ENSG00000143224			.	.	0.15847
ACADS	ENSG00000122971	PRODH	ENSG00000100033			.	.	0.079455
ACADS	ENSG00000122971	PUS1	ENSG00000177192			.	.	0.14892
ACADS	ENSG00000122971	RMRP	ENSG00000199916			.	.	0.103677
ACADS	ENSG00000122971	SCO1	ENSG00000133028		RCC4	.	.	0.424475
ACADS	ENSG00000122971	SCO2	ENSG00000130489		RCC4	.	.	0.144405
ACADS	ENSG00000122971	SDHA	ENSG00000073578		RCC2;TCA	.	.	0.070211
ACADS	ENSG00000122971	SDHB	ENSG00000117118		RCC2;TCA	.	.	0.051596
ACADS	ENSG00000122971	SDHC	ENSG00000143252		RCC2;TCA	.	.	0.037476
ACADS	ENSG00000122971	SDHD	ENSG00000204370		RCC2;TCA	.	.	0.045686
ACADS	ENSG00000122971	SLC19A2	ENSG00000117479			.	.	0.091781
ACADS	ENSG00000122971	SLC25A13	ENSG00000004864		UC	.	.	0.075383
ACADS	ENSG00000122971	SLC25A15	ENSG00000102743		UC	.	.	0.151027
ACADS	ENSG00000122971	SLC25A16	ENSG00000122912			.	.	0.203972
ACADS	ENSG00000122971	SLC25A19	ENSG00000125454			.	.	0.271798
ACADS	ENSG00000122971	SLC25A20	ENSG00000178537			.	.	0.146205
ACADS	ENSG00000122971	SLC25A22	ENSG00000177542			.	.	0.232538
ACADS	ENSG00000122971	SLC25A4	ENSG00000151729			.	.	0.163156
ACADS	ENSG00000122971	SOD1	ENSG00000142168			.	.	0.139424
ACADS	ENSG00000122971	SPAST	ENSG00000021574			.	.	0.079877
ACADS	ENSG00000122971	SPG7	ENSG00000197912			.	.	0.080209
ACADS	ENSG00000122971	STAR	ENSG00000147465			.	.	0.108764
ACADS	ENSG00000122971	SUCLA2	ENSG00000136143		TCA	.	.	0.29369
ACADS	ENSG00000122971	SUOX	ENSG00000139531			.	.	0.11516
ACADS	ENSG00000122971	SURF1	ENSG00000148290		RCC4	.	.	0.112607
ACADS	ENSG00000122971	TAT	ENSG00000198650			.	.	0.209907
ACADS	ENSG00000122971	TAZ	ENSG00000102125			.	.	0.19645
ACADS	ENSG00000122971	TIMM8A	ENSG00000126953			.	.	0.08522
ACADS	ENSG00000122971	TK2	ENSG00000166548			.	.	0.123428
ACADS	ENSG00000122971	TP53	ENSG00000141510			.	.	0.029148
ACADS	ENSG00000122971	UCP1	ENSG00000109424			.	.	0.504273
ACADS	ENSG00000122971	UCP2	ENSG00000175567			.	.	0.611413
ACADS	ENSG00000122971	UCP3	ENSG00000175564			.	.	0.600009
ACADS	ENSG00000122971	UNG	ENSG00000076248			.	.	0.348296
ACADS	ENSG00000122971	UQCRB	ENSG00000156467			.	.	0.161091
ACADS	ENSG00000122971	UROS	ENSG00000188690			.	.	0.073533
ACADS	ENSG00000122971	WFS1	ENSG00000109501			.	.	0.134987
ACADSB	ENSG00000196177	AASS	ENSG00000008311			.	.	0.172667
ACADSB	ENSG00000196177	ABAT	ENSG00000183044			.	.	0.259364
ACADSB	ENSG00000196177	ABCB7	ENSG00000131269			.	.	0.169024
ACADSB	ENSG00000196177	ABCD1	ENSG00000101986			.	.	0.087722
ACADSB	ENSG00000196177	ACADL	ENSG00000115361			131.1	0.327778	0.186758	yes	cluster-1
ACADSB	ENSG00000196177	ACADM	ENSG00000117054			461.5	0.414067	0.290318	yes	cluster-1
ACADSB	ENSG00000196177	ACADS	ENSG00000122971			142.3	0.333399	0.170824	yes	cluster-1
ACADSB	ENSG00000196177	ACADVL	ENSG00000072778			136.1	0.330344	0.238706	yes	cluster-1
ACADSB	ENSG00000196177	ACAT1	ENSG00000075239			.	.	0.180464
ACADSB	ENSG00000196177	ACSL4	ENSG00000068366			.	.	0.195774
ACADSB	ENSG00000196177	ACSL6	ENSG00000164398			.	.	0.237172
ACADSB	ENSG00000196177	AGXT	ENSG00000172482			.	.	0.139261
ACADSB	ENSG00000196177	ALAS2	ENSG00000158578			.	.	0.249235
ACADSB	ENSG00000196177	ALDH18A1	ENSG00000059573			.	.	0.481962
ACADSB	ENSG00000196177	ALDH2	ENSG00000111275			.	.	0.05
ACADSB	ENSG00000196177	ALDH4A1	ENSG00000159423			.	.	0.202665
ACADSB	ENSG00000196177	ALDH5A1	ENSG00000112294			.	.	0.180166
ACADSB	ENSG00000196177	ALDH6A1	ENSG00000119711			.	.	0.580345
ACADSB	ENSG00000196177	AMACR	ENSG00000082196			.	.	0.183604
ACADSB	ENSG00000196177	AMT	ENSG00000145020		GCC	.	.	0.325046
ACADSB	ENSG00000196177	ATP7B	ENSG00000123191			.	.	0.075956
ACADSB	ENSG00000196177	ATPAF2	ENSG00000171953			.	.	0.247374
ACADSB	ENSG00000196177	AUH	ENSG00000148090			.	.	0.201475
ACADSB	ENSG00000196177	BCKDHA	ENSG00000142046		BCKDH	14.1	0.174896	0.107992	yes	cluster-1
ACADSB	ENSG00000196177	BCKDHB	ENSG00000083123		BCKDH	23.9	0.211077	0.17168	yes	cluster-1
ACADSB	ENSG00000196177	BCL2	ENSG00000171791			.	.	0.031804
ACADSB	ENSG00000196177	BCS1L	ENSG00000074582			.	.	0.210817
ACADSB	ENSG00000196177	CASP8	ENSG00000064012			.	.	0.100093
ACADSB	ENSG00000196177	CLN3	ENSG00000188603			.	.	0.127653
ACADSB	ENSG00000196177	COX10	ENSG00000006695		RCC4	.	.	0.287401
ACADSB	ENSG00000196177	COX15	ENSG00000014919		RCC4	.	.	0.281693
ACADSB	ENSG00000196177	CPOX	ENSG00000080819			81.2	0.294933	0.167354	yes	cluster-1
ACADSB	ENSG00000196177	CPS1	ENSG00000021826		UC	.	.	0.111335
ACADSB	ENSG00000196177	CPT1A	ENSG00000110090			.	.	0.163749
ACADSB	ENSG00000196177	CPT2	ENSG00000157184			.	.	0.130684
ACADSB	ENSG00000196177	CYB5R3	ENSG00000100243			.	.	0.064492
ACADSB	ENSG00000196177	CYBA	ENSG00000051523			.	.	0.097032
ACADSB	ENSG00000196177	CYBB	ENSG00000165168			.	.	0.160426
ACADSB	ENSG00000196177	CYP11A1	ENSG00000140459			.	.	0.176886
ACADSB	ENSG00000196177	CYP11B1	ENSG00000160882			.	.	0.118737
ACADSB	ENSG00000196177	CYP11B2	ENSG00000179142			.	.	0.098921
ACADSB	ENSG00000196177	CYP27A1	ENSG00000135929			.	.	0.200962
ACADSB	ENSG00000196177	CYP27B1	ENSG00000111012			.	.	0.288064
ACADSB	ENSG00000196177	DBT	ENSG00000137992		BCKDH	0.6	.	0.183739
ACADSB	ENSG00000196177	DGUOK	ENSG00000114956			.	.	0.182241
ACADSB	ENSG00000196177	DLAT	ENSG00000150768		PDH	.	.	0.067163
ACADSB	ENSG00000196177	DLD	ENSG00000091140		AKDH;BCKDH;GCC;PDH;TCA	36.9	0.240857	0.135944	yes	cluster-1
ACADSB	ENSG00000196177	DLST	ENSG00000119689		AKDH;TCA	.	.	0.302296
ACADSB	ENSG00000196177	DMGDH	ENSG00000132837			.	.	1
ACADSB	ENSG00000196177	DMPK	ENSG00000104936			.	.	0.100562
ACADSB	ENSG00000196177	DNAJC19	ENSG00000205981			.	.	0.430146
ACADSB	ENSG00000196177	ECGF1	ENSG00000025708			.	.	0.256764
ACADSB	ENSG00000196177	ETFA	ENSG00000140374			.	.	0.194071
ACADSB	ENSG00000196177	ETFB	ENSG00000105379			.	.	0.288288
ACADSB	ENSG00000196177	ETFDH	ENSG00000171503			.	.	0.21251
ACADSB	ENSG00000196177	ETHE1	ENSG00000105755			.	.	0.308545
ACADSB	ENSG00000196177	FECH	ENSG00000066926			.	.	0.255391
ACADSB	ENSG00000196177	FH	ENSG00000091483		TCA	.	.	0.11969
ACADSB	ENSG00000196177	FXN	ENSG00000165060			.	.	0.095964
ACADSB	ENSG00000196177	GATM	ENSG00000171766			.	.	0.286421
ACADSB	ENSG00000196177	GCDH	ENSG00000105607			.	.	0.174968
ACADSB	ENSG00000196177	GCK	ENSG00000106633			.	.	0.173127
ACADSB	ENSG00000196177	GCSH	ENSG00000140905		GCC	.	.	0.333438
ACADSB	ENSG00000196177	GDAP1	ENSG00000104381			.	.	0.262526
ACADSB	ENSG00000196177	GFM1	ENSG00000168827			.	.	0.285244
ACADSB	ENSG00000196177	GK	ENSG00000198814			.	.	0.136623
ACADSB	ENSG00000196177	GLDC	ENSG00000178445		GCC	.	.	0.234709
ACADSB	ENSG00000196177	GLUD1	ENSG00000148672			.	.	0.264606
ACADSB	ENSG00000196177	GPD2	ENSG00000115159			.	.	0.55539
ACADSB	ENSG00000196177	HADH	ENSG00000138796			.	.	0.349295
ACADSB	ENSG00000196177	HADHA	ENSG00000084754			.	.	0.144847
ACADSB	ENSG00000196177	HADHB	ENSG00000138029			45.6	0.255371	0.242362	yes	cluster-1
ACADSB	ENSG00000196177	HD	ENSG00000197386			.	.	0.093809
ACADSB	ENSG00000196177	HK1	ENSG00000156515			.	.	0.535093
ACADSB	ENSG00000196177	HLCS	ENSG00000159267			.	.	0.214502
ACADSB	ENSG00000196177	HMGCL	ENSG00000117305			.	.	0.168267
ACADSB	ENSG00000196177	HMGCS2	ENSG00000134240			.	.	0.329309
ACADSB	ENSG00000196177	HSD17B10	ENSG00000072506			.	.	0.312377
ACADSB	ENSG00000196177	HSD3B2	ENSG00000203859			.	.	0.110935
ACADSB	ENSG00000196177	HSPD1	ENSG00000144381			.	.	0.306755
ACADSB	ENSG00000196177	HTRA2	ENSG00000115317			.	.	0.73866
ACADSB	ENSG00000196177	IVD	ENSG00000128928			.	.	0.275925
ACADSB	ENSG00000196177	KIF1B	ENSG00000054523			.	.	0.306788
ACADSB	ENSG00000196177	LRPPRC	ENSG00000138095			.	.	0.276321
ACADSB	ENSG00000196177	LRRK2	ENSG00000188906			.	.	0.321553
ACADSB	ENSG00000196177	MAOA	ENSG00000189221			.	.	0.145821
ACADSB	ENSG00000196177	MCCC1	ENSG00000078070			.	.	0.467277
ACADSB	ENSG00000196177	MCCC2	ENSG00000131844			.	.	0.220027
ACADSB	ENSG00000196177	ME2	ENSG00000082212			.	.	0.373038
ACADSB	ENSG00000196177	MFN2	ENSG00000116688			.	.	0.208701
ACADSB	ENSG00000196177	MLYCD	ENSG00000103150			.	.	0.290072
ACADSB	ENSG00000196177	MMAA	ENSG00000151611			.	.	0.18807
ACADSB	ENSG00000196177	MMAB	ENSG00000139428			.	.	0.274824
ACADSB	ENSG00000196177	MPV17	ENSG00000115204			.	.	0.165449
ACADSB	ENSG00000196177	MRPS16	ENSG00000182180			.	.	0.489557
ACADSB	ENSG00000196177	MTHFD1	ENSG00000100714			.	.	0.117884
ACADSB	ENSG00000196177	MTRR	ENSG00000124275			.	.	0.132236
ACADSB	ENSG00000196177	MUT	ENSG00000146085			.	.	0.180652
ACADSB	ENSG00000196177	NAGS	ENSG00000161653		UC	.	.	0.149553
ACADSB	ENSG00000196177	NDUFA12L	ENSG00000164182		RCC1	.	.	0.408097
ACADSB	ENSG00000196177	NDUFS1	ENSG00000023228		RCC1	.	.	0.352073
ACADSB	ENSG00000196177	NDUFS2	ENSG00000158864		RCC1	.	.	0.229736
ACADSB	ENSG00000196177	NDUFS3	ENSG00000110536		RCC1	.	.	0.481796
ACADSB	ENSG00000196177	NDUFS4	ENSG00000164258		RCC1	.	.	0.224014
ACADSB	ENSG00000196177	NDUFS6	ENSG00000145494		RCC1	.	.	0.516481
ACADSB	ENSG00000196177	NDUFS7	ENSG00000115286		RCC1	.	.	0.32807
ACADSB	ENSG00000196177	NDUFS8	ENSG00000110717		RCC1	.	.	0.138103
ACADSB	ENSG00000196177	NDUFV1	ENSG00000167792		RCC1	.	.	0.209614
ACADSB	ENSG00000196177	NDUFV2	ENSG00000178127		RCC1	.	.	0.178886
ACADSB	ENSG00000196177	OAT	ENSG00000065154			.	.	0.255112
ACADSB	ENSG00000196177	OGDH	ENSG00000105953		AKDH;TCA	.	.	0.394988
ACADSB	ENSG00000196177	OPA1	ENSG00000198836			.	.	0.087908
ACADSB	ENSG00000196177	OPA3	ENSG00000125741			.	.	0.35616
ACADSB	ENSG00000196177	OTC	ENSG00000036473		UC	.	.	0.093735
ACADSB	ENSG00000196177	OXCT1	ENSG00000083720			.	.	0.182127
ACADSB	ENSG00000196177	PANK2	ENSG00000125779			.	.	0.14969
ACADSB	ENSG00000196177	PARK7	ENSG00000116288			.	.	0.224746
ACADSB	ENSG00000196177	PARL	ENSG00000175193			.	.	0.55539
ACADSB	ENSG00000196177	PC	ENSG00000173599			.	.	0.151736
ACADSB	ENSG00000196177	PCCA	ENSG00000175198			.	.	0.09178
ACADSB	ENSG00000196177	PCCB	ENSG00000114054			.	.	0.124194
ACADSB	ENSG00000196177	PCK2	ENSG00000100889			.	.	0.427183
ACADSB	ENSG00000196177	PDHA1	ENSG00000131828		PDH;TCA	.	.	0.132826
ACADSB	ENSG00000196177	PDHB	ENSG00000168291		PDH	.	.	0.634675
ACADSB	ENSG00000196177	PDHX	ENSG00000110435		PDH	.	.	0.128993
ACADSB	ENSG00000196177	PEO1	ENSG00000107815			.	.	0.133681
ACADSB	ENSG00000196177	PINK1	ENSG00000158828			.	.	0.301065
ACADSB	ENSG00000196177	POLG	ENSG00000140521			.	.	0.105518
ACADSB	ENSG00000196177	POLG2	ENSG00000136480			.	.	0.322373
ACADSB	ENSG00000196177	PPOX	ENSG00000143224			.	.	0.206956
ACADSB	ENSG00000196177	PRODH	ENSG00000100033			.	.	0.196171
ACADSB	ENSG00000196177	PUS1	ENSG00000177192			.	.	0.175461
ACADSB	ENSG00000196177	RMRP	ENSG00000199916			.	.	0.09213
ACADSB	ENSG00000196177	SCO1	ENSG00000133028		RCC4	.	.	0.496174
ACADSB	ENSG00000196177	SCO2	ENSG00000130489		RCC4	.	.	0.195301
ACADSB	ENSG00000196177	SDHA	ENSG00000073578		RCC2;TCA	.	.	0.109538
ACADSB	ENSG00000196177	SDHB	ENSG00000117118		RCC2;TCA	.	.	0.063809
ACADSB	ENSG00000196177	SDHC	ENSG00000143252		RCC2;TCA	.	.	0.039614
ACADSB	ENSG00000196177	SDHD	ENSG00000204370		RCC2;TCA	.	.	0.05269
ACADSB	ENSG00000196177	SLC19A2	ENSG00000117479			.	.	0.106883
ACADSB	ENSG00000196177	SLC25A13	ENSG00000004864		UC	.	.	0.153509
ACADSB	ENSG00000196177	SLC25A15	ENSG00000102743		UC	.	.	0.106174
ACADSB	ENSG00000196177	SLC25A16	ENSG00000122912			.	.	0.478574
ACADSB	ENSG00000196177	SLC25A19	ENSG00000125454			.	.	0.414579
ACADSB	ENSG00000196177	SLC25A20	ENSG00000178537			.	.	0.180443
ACADSB	ENSG00000196177	SLC25A22	ENSG00000177542			.	.	0.350761
ACADSB	ENSG00000196177	SLC25A4	ENSG00000151729			.	.	0.296882
ACADSB	ENSG00000196177	SOD1	ENSG00000142168			.	.	0.268829
ACADSB	ENSG00000196177	SPAST	ENSG00000021574			.	.	0.1401
ACADSB	ENSG00000196177	SPG7	ENSG00000197912			.	.	0.087994
ACADSB	ENSG00000196177	STAR	ENSG00000147465			.	.	0.163223
ACADSB	ENSG00000196177	SUCLA2	ENSG00000136143		TCA	.	.	0.441338
ACADSB	ENSG00000196177	SUOX	ENSG00000139531			.	.	0.139805
ACADSB	ENSG00000196177	SURF1	ENSG00000148290		RCC4	.	.	0.136928
ACADSB	ENSG00000196177	TAT	ENSG00000198650			.	.	0.282016
ACADSB	ENSG00000196177	TAZ	ENSG00000102125			.	.	0.148945
ACADSB	ENSG00000196177	TIMM8A	ENSG00000126953			.	.	0.165403
ACADSB	ENSG00000196177	TK2	ENSG00000166548			.	.	0.249176
ACADSB	ENSG00000196177	TP53	ENSG00000141510			.	.	0.029419
ACADSB	ENSG00000196177	UCP1	ENSG00000109424			.	.	0.432693
ACADSB	ENSG00000196177	UCP2	ENSG00000175567			.	.	0.528335
ACADSB	ENSG00000196177	UCP3	ENSG00000175564			.	.	0.529133
ACADSB	ENSG00000196177	UNG	ENSG00000076248			.	.	0.2
ACADSB	ENSG00000196177	UQCRB	ENSG00000156467			.	.	0.384999
ACADSB	ENSG00000196177	UROS	ENSG00000188690			.	.	0.072197
ACADSB	ENSG00000196177	WFS1	ENSG00000109501			.	.	0.236669
ACADVL	ENSG00000072778	AASS	ENSG00000008311			.	.	0.096578
ACADVL	ENSG00000072778	ABAT	ENSG00000183044			.	.	0.090094
ACADVL	ENSG00000072778	ABCB7	ENSG00000131269			.	.	0.075217
ACADVL	ENSG00000072778	ABCD1	ENSG00000101986			.	.	0.100463
ACADVL	ENSG00000072778	ACADL	ENSG00000115361			173.3	0.346912	0.202335	yes	cluster-1
ACADVL	ENSG00000072778	ACADM	ENSG00000117054			342.1	0.39354	0.126924	yes	cluster-1
ACADVL	ENSG00000072778	ACADS	ENSG00000122971			476.4	0.416245	0.116161	yes	cluster-1
ACADVL	ENSG00000072778	ACADSB	ENSG00000196177			136.1	0.330344	0.238706	yes	cluster-1
ACADVL	ENSG00000072778	ACAT1	ENSG00000075239			.	.	0.135634
ACADVL	ENSG00000072778	ACSL4	ENSG00000068366			.	.	0.151776
ACADVL	ENSG00000072778	ACSL6	ENSG00000164398			.	.	0.161811
ACADVL	ENSG00000072778	AGXT	ENSG00000172482			.	.	0.048116
ACADVL	ENSG00000072778	ALAS2	ENSG00000158578			.	.	0.110941
ACADVL	ENSG00000072778	ALDH18A1	ENSG00000059573			.	.	0.228828
ACADVL	ENSG00000072778	ALDH2	ENSG00000111275			.	.	0.140403
ACADVL	ENSG00000072778	ALDH4A1	ENSG00000159423			.	.	0.162088
ACADVL	ENSG00000072778	ALDH5A1	ENSG00000112294			.	.	0.140278
ACADVL	ENSG00000072778	ALDH6A1	ENSG00000119711			.	.	0.382573
ACADVL	ENSG00000072778	AMACR	ENSG00000082196			.	.	0.086339
ACADVL	ENSG00000072778	AMT	ENSG00000145020		GCC	.	.	0.153547
ACADVL	ENSG00000072778	ATP7B	ENSG00000123191			.	.	0.081245
ACADVL	ENSG00000072778	ATPAF2	ENSG00000171953			.	.	0.318647
ACADVL	ENSG00000072778	AUH	ENSG00000148090			.	.	0.120294
ACADVL	ENSG00000072778	BCKDHA	ENSG00000142046		BCKDH	.	.	0.130783
ACADVL	ENSG00000072778	BCKDHB	ENSG00000083123		BCKDH	.	.	0.123422
ACADVL	ENSG00000072778	BCL2	ENSG00000171791			.	.	0.059769
ACADVL	ENSG00000072778	BCS1L	ENSG00000074582			.	.	0.162982
ACADVL	ENSG00000072778	CASP8	ENSG00000064012			.	.	0.07788
ACADVL	ENSG00000072778	CLN3	ENSG00000188603			.	.	0.095101
ACADVL	ENSG00000072778	COX10	ENSG00000006695		RCC4	.	.	0.18868
ACADVL	ENSG00000072778	COX15	ENSG00000014919		RCC4	.	.	0.255675
ACADVL	ENSG00000072778	CPOX	ENSG00000080819			.	.	0.156929
ACADVL	ENSG00000072778	CPS1	ENSG00000021826		UC	.	.	0.11859
ACADVL	ENSG00000072778	CPT1A	ENSG00000110090			115.5	0.319092	0.150111	yes	cluster-1
ACADVL	ENSG00000072778	CPT2	ENSG00000157184			57.2	0.270911	0.13433	yes	cluster-1
ACADVL	ENSG00000072778	CYB5R3	ENSG00000100243			.	.	0.058396
ACADVL	ENSG00000072778	CYBA	ENSG00000051523			.	.	0.100503
ACADVL	ENSG00000072778	CYBB	ENSG00000165168			.	.	0.157865
ACADVL	ENSG00000072778	CYP11A1	ENSG00000140459			.	.	0.182963
ACADVL	ENSG00000072778	CYP11B1	ENSG00000160882			.	.	0.304862
ACADVL	ENSG00000072778	CYP11B2	ENSG00000179142			.	.	0.081924
ACADVL	ENSG00000072778	CYP27A1	ENSG00000135929			.	.	0.142348
ACADVL	ENSG00000072778	CYP27B1	ENSG00000111012			.	.	0.120912
ACADVL	ENSG00000072778	DBT	ENSG00000137992		BCKDH	.	.	0.117483
ACADVL	ENSG00000072778	DGUOK	ENSG00000114956			.	.	0.228302
ACADVL	ENSG00000072778	DLAT	ENSG00000150768		PDH	.	.	0.099196
ACADVL	ENSG00000072778	DLD	ENSG00000091140		AKDH;BCKDH;GCC;PDH;TCA	.	.	0.113111
ACADVL	ENSG00000072778	DLST	ENSG00000119689		AKDH;TCA	.	.	0.189652
ACADVL	ENSG00000072778	DMGDH	ENSG00000132837			.	.	0.352615
ACADVL	ENSG00000072778	DMPK	ENSG00000104936			.	.	0.084797
ACADVL	ENSG00000072778	DNAJC19	ENSG00000205981			.	.	0.414689
ACADVL	ENSG00000072778	ECGF1	ENSG00000025708			.	.	0.128134
ACADVL	ENSG00000072778	ETFA	ENSG00000140374			.	.	0.138207
ACADVL	ENSG00000072778	ETFB	ENSG00000105379			.	.	0.120393
ACADVL	ENSG00000072778	ETFDH	ENSG00000171503			.	.	0.158495
ACADVL	ENSG00000072778	ETHE1	ENSG00000105755			.	.	0.103375
ACADVL	ENSG00000072778	FECH	ENSG00000066926			.	.	0.11722
ACADVL	ENSG00000072778	FH	ENSG00000091483		TCA	.	.	0.082177
ACADVL	ENSG00000072778	FXN	ENSG00000165060			.	.	0.250266
ACADVL	ENSG00000072778	GATM	ENSG00000171766			.	.	0.163599
ACADVL	ENSG00000072778	GCDH	ENSG00000105607			48	0.258888	0.109245	yes	cluster-1
ACADVL	ENSG00000072778	GCK	ENSG00000106633			.	.	0.247956
ACADVL	ENSG00000072778	GCSH	ENSG00000140905		GCC	.	.	0.137212
ACADVL	ENSG00000072778	GDAP1	ENSG00000104381			.	.	0.234397
ACADVL	ENSG00000072778	GFM1	ENSG00000168827			.	.	0.411117
ACADVL	ENSG00000072778	GK	ENSG00000198814			.	.	0.119032
ACADVL	ENSG00000072778	GLDC	ENSG00000178445		GCC	.	.	0.142914
ACADVL	ENSG00000072778	GLUD1	ENSG00000148672			.	.	0.200564
ACADVL	ENSG00000072778	GPD2	ENSG00000115159			.	.	0.56299
ACADVL	ENSG00000072778	HADH	ENSG00000138796			.	.	0.212677
ACADVL	ENSG00000072778	HADHA	ENSG00000084754			32.6	0.232362	0.133843	yes	cluster-1
ACADVL	ENSG00000072778	HADHB	ENSG00000138029			164.7	0.343422	0.175081	yes	cluster-1
ACADVL	ENSG00000072778	HD	ENSG00000197386			.	.	0.050036
ACADVL	ENSG00000072778	HK1	ENSG00000156515			.	.	0.098528
ACADVL	ENSG00000072778	HLCS	ENSG00000159267			.	.	0.151409
ACADVL	ENSG00000072778	HMGCL	ENSG00000117305			.	.	0.207963
ACADVL	ENSG00000072778	HMGCS2	ENSG00000134240			.	.	0.316767
ACADVL	ENSG00000072778	HSD17B10	ENSG00000072506			.	.	0.264089
ACADVL	ENSG00000072778	HSD3B2	ENSG00000203859			.	.	0.108867
ACADVL	ENSG00000072778	HSPD1	ENSG00000144381			.	.	0.238193
ACADVL	ENSG00000072778	HTRA2	ENSG00000115317			.	.	0.234213
ACADVL	ENSG00000072778	IVD	ENSG00000128928			.	.	0.151619
ACADVL	ENSG00000072778	KIF1B	ENSG00000054523			.	.	0.333432
ACADVL	ENSG00000072778	LRPPRC	ENSG00000138095			.	.	0.265542
ACADVL	ENSG00000072778	LRRK2	ENSG00000188906			.	.	0.176392
ACADVL	ENSG00000072778	MAOA	ENSG00000189221			.	.	0.121774
ACADVL	ENSG00000072778	MCCC1	ENSG00000078070			.	.	0.198298
ACADVL	ENSG00000072778	MCCC2	ENSG00000131844			.	.	0.179959
ACADVL	ENSG00000072778	ME2	ENSG00000082212			.	.	0.183334
ACADVL	ENSG00000072778	MFN2	ENSG00000116688			.	.	0.235842
ACADVL	ENSG00000072778	MLYCD	ENSG00000103150			.	.	0.204189
ACADVL	ENSG00000072778	MMAA	ENSG00000151611			.	.	0.128714
ACADVL	ENSG00000072778	MMAB	ENSG00000139428			.	.	0.152141
ACADVL	ENSG00000072778	MPV17	ENSG00000115204			.	.	0.171745
ACADVL	ENSG00000072778	MRPS16	ENSG00000182180			.	.	0.395459
ACADVL	ENSG00000072778	MTHFD1	ENSG00000100714			.	.	0.116331
ACADVL	ENSG00000072778	MTRR	ENSG00000124275			.	.	0.050054
ACADVL	ENSG00000072778	MUT	ENSG00000146085			.	.	0.13674
ACADVL	ENSG00000072778	NAGS	ENSG00000161653		UC	.	.	0.147481
ACADVL	ENSG00000072778	NDUFA12L	ENSG00000164182		RCC1	.	.	0.315378
ACADVL	ENSG00000072778	NDUFS1	ENSG00000023228		RCC1	.	.	0.213573
ACADVL	ENSG00000072778	NDUFS2	ENSG00000158864		RCC1	.	.	0.163448
ACADVL	ENSG00000072778	NDUFS3	ENSG00000110536		RCC1	.	.	0.309325
ACADVL	ENSG00000072778	NDUFS4	ENSG00000164258		RCC1	.	.	0.178658
ACADVL	ENSG00000072778	NDUFS6	ENSG00000145494		RCC1	.	.	0.284558
ACADVL	ENSG00000072778	NDUFS7	ENSG00000115286		RCC1	.	.	0.169586
ACADVL	ENSG00000072778	NDUFS8	ENSG00000110717		RCC1	.	.	0.194687
ACADVL	ENSG00000072778	NDUFV1	ENSG00000167792		RCC1	.	.	0.247449
ACADVL	ENSG00000072778	NDUFV2	ENSG00000178127		RCC1	.	.	0.137975
ACADVL	ENSG00000072778	OAT	ENSG00000065154			.	.	0.165393
ACADVL	ENSG00000072778	OGDH	ENSG00000105953		AKDH;TCA	.	.	0.159674
ACADVL	ENSG00000072778	OPA1	ENSG00000198836			.	.	0.05578
ACADVL	ENSG00000072778	OPA3	ENSG00000125741			.	.	0.26851
ACADVL	ENSG00000072778	OTC	ENSG00000036473		UC	.	.	0.097707
ACADVL	ENSG00000072778	OXCT1	ENSG00000083720			.	.	0.123291
ACADVL	ENSG00000072778	PANK2	ENSG00000125779			.	.	0.169185
ACADVL	ENSG00000072778	PARK7	ENSG00000116288			.	.	0.119628
ACADVL	ENSG00000072778	PARL	ENSG00000175193			.	.	0.56299
ACADVL	ENSG00000072778	PC	ENSG00000173599			.	.	0.123762
ACADVL	ENSG00000072778	PCCA	ENSG00000175198			.	.	0.144735
ACADVL	ENSG00000072778	PCCB	ENSG00000114054			.	.	0.12244
ACADVL	ENSG00000072778	PCK2	ENSG00000100889			.	.	0.531655
ACADVL	ENSG00000072778	PDHA1	ENSG00000131828		PDH;TCA	.	.	0.122786
ACADVL	ENSG00000072778	PDHB	ENSG00000168291		PDH	.	.	0.311875
ACADVL	ENSG00000072778	PDHX	ENSG00000110435		PDH	.	.	0.131387
ACADVL	ENSG00000072778	PEO1	ENSG00000107815			.	.	0.089726
ACADVL	ENSG00000072778	PINK1	ENSG00000158828			.	.	0.101975
ACADVL	ENSG00000072778	POLG	ENSG00000140521			.	.	0.089279
ACADVL	ENSG00000072778	POLG2	ENSG00000136480			.	.	0.347338
ACADVL	ENSG00000072778	PPOX	ENSG00000143224			.	.	0.094988
ACADVL	ENSG00000072778	PRODH	ENSG00000100033			.	.	0.217841
ACADVL	ENSG00000072778	PUS1	ENSG00000177192			.	.	0.218739
ACADVL	ENSG00000072778	RMRP	ENSG00000199916			.	.	0.156142
ACADVL	ENSG00000072778	SCO1	ENSG00000133028		RCC4	.	.	0.363155
ACADVL	ENSG00000072778	SCO2	ENSG00000130489		RCC4	.	.	0.303801
ACADVL	ENSG00000072778	SDHA	ENSG00000073578		RCC2;TCA	.	.	0.074719
ACADVL	ENSG00000072778	SDHB	ENSG00000117118		RCC2;TCA	47.7	0.258458	0.061123	yes	cluster-1
ACADVL	ENSG00000072778	SDHC	ENSG00000143252		RCC2;TCA	45.8	0.255671	0.063058	yes	cluster-1
ACADVL	ENSG00000072778	SDHD	ENSG00000204370		RCC2;TCA	.	.	0.101483
ACADVL	ENSG00000072778	SLC19A2	ENSG00000117479			.	.	0.175999
ACADVL	ENSG00000072778	SLC25A13	ENSG00000004864		UC	.	.	0.105437
ACADVL	ENSG00000072778	SLC25A15	ENSG00000102743		UC	.	.	0.127975
ACADVL	ENSG00000072778	SLC25A16	ENSG00000122912			.	.	0.128387
ACADVL	ENSG00000072778	SLC25A19	ENSG00000125454			.	.	0.314135
ACADVL	ENSG00000072778	SLC25A20	ENSG00000178537			.	.	0.201044
ACADVL	ENSG00000072778	SLC25A22	ENSG00000177542			.	.	0.279971
ACADVL	ENSG00000072778	SLC25A4	ENSG00000151729			.	.	0.107885
ACADVL	ENSG00000072778	SOD1	ENSG00000142168			.	.	0.137479
ACADVL	ENSG00000072778	SPAST	ENSG00000021574			.	.	0.176797
ACADVL	ENSG00000072778	SPG7	ENSG00000197912			.	.	0.12284
ACADVL	ENSG00000072778	STAR	ENSG00000147465			.	.	0.196544
ACADVL	ENSG00000072778	SUCLA2	ENSG00000136143		TCA	.	.	0.342481
ACADVL	ENSG00000072778	SUOX	ENSG00000139531			.	.	0.130339
ACADVL	ENSG00000072778	SURF1	ENSG00000148290		RCC4	.	.	0.10895
ACADVL	ENSG00000072778	TAT	ENSG00000198650			.	.	0.080931
ACADVL	ENSG00000072778	TAZ	ENSG00000102125			.	.	0.259909
ACADVL	ENSG00000072778	TIMM8A	ENSG00000126953			.	.	0.108482
ACADVL	ENSG00000072778	TK2	ENSG00000166548			.	.	0.182181
ACADVL	ENSG00000072778	TP53	ENSG00000141510			.	.	0.035219
ACADVL	ENSG00000072778	UCP1	ENSG00000109424			.	.	0.330708
ACADVL	ENSG00000072778	UCP2	ENSG00000175567			.	.	0.393777
ACADVL	ENSG00000072778	UCP3	ENSG00000175564			.	.	0.435424
ACADVL	ENSG00000072778	UNG	ENSG00000076248			.	.	0.234785
ACADVL	ENSG00000072778	UQCRB	ENSG00000156467			.	.	0.411405
ACADVL	ENSG00000072778	UROS	ENSG00000188690			.	.	0.096006
ACADVL	ENSG00000072778	WFS1	ENSG00000109501			.	.	0.220499
ACAT1	ENSG00000075239	AASS	ENSG00000008311			.	.	0.143916
ACAT1	ENSG00000075239	ABAT	ENSG00000183044			.	.	0.102211
ACAT1	ENSG00000075239	ABCB7	ENSG00000131269			.	.	0.255343
ACAT1	ENSG00000075239	ABCD1	ENSG00000101986			.	.	0.108258
ACAT1	ENSG00000075239	ACADL	ENSG00000115361			1.3	0.011454	0.154816	yes	cluster-1
ACAT1	ENSG00000075239	ACADM	ENSG00000117054			7.9	0.135177	0.140241	yes	cluster-1
ACAT1	ENSG00000075239	ACADS	ENSG00000122971			1	.	0.229027
ACAT1	ENSG00000075239	ACADSB	ENSG00000196177			.	.	0.180464
ACAT1	ENSG00000075239	ACADVL	ENSG00000072778			.	.	0.135634
ACAT1	ENSG00000075239	ACSL4	ENSG00000068366			.	.	0.211011
ACAT1	ENSG00000075239	ACSL6	ENSG00000164398			.	.	0.254746
ACAT1	ENSG00000075239	AGXT	ENSG00000172482			.	.	0.141827
ACAT1	ENSG00000075239	ALAS2	ENSG00000158578			.	.	0.234314
ACAT1	ENSG00000075239	ALDH18A1	ENSG00000059573			.	.	0.304187
ACAT1	ENSG00000075239	ALDH2	ENSG00000111275			.	.	0.022727
ACAT1	ENSG00000075239	ALDH4A1	ENSG00000159423			.	.	0.276653
ACAT1	ENSG00000075239	ALDH5A1	ENSG00000112294			.	.	0.372093
ACAT1	ENSG00000075239	ALDH6A1	ENSG00000119711			.	.	0.803207
ACAT1	ENSG00000075239	AMACR	ENSG00000082196			.	.	0.163697
ACAT1	ENSG00000075239	AMT	ENSG00000145020		GCC	.	.	0.201811
ACAT1	ENSG00000075239	ATP7B	ENSG00000123191			.	.	0.074495
ACAT1	ENSG00000075239	ATPAF2	ENSG00000171953			.	.	0.536524
ACAT1	ENSG00000075239	AUH	ENSG00000148090			.	.	0.277133
ACAT1	ENSG00000075239	BCKDHA	ENSG00000142046		BCKDH	.	.	0.195835
ACAT1	ENSG00000075239	BCKDHB	ENSG00000083123		BCKDH	.	.	0.198199
ACAT1	ENSG00000075239	BCL2	ENSG00000171791			.	.	0.078388
ACAT1	ENSG00000075239	BCS1L	ENSG00000074582			.	.	0.256783
ACAT1	ENSG00000075239	CASP8	ENSG00000064012			.	.	0.18901
ACAT1	ENSG00000075239	CLN3	ENSG00000188603			.	.	0.093507
ACAT1	ENSG00000075239	COX10	ENSG00000006695		RCC4	.	.	0.288656
ACAT1	ENSG00000075239	COX15	ENSG00000014919		RCC4	.	.	0.562384
ACAT1	ENSG00000075239	CPOX	ENSG00000080819			.	.	0.150033
ACAT1	ENSG00000075239	CPS1	ENSG00000021826		UC	.	.	0.208908
ACAT1	ENSG00000075239	CPT1A	ENSG00000110090			57	0.270671	0.160727	yes	cluster-1
ACAT1	ENSG00000075239	CPT2	ENSG00000157184			.	.	0.088664
ACAT1	ENSG00000075239	CYB5R3	ENSG00000100243			.	.	0.109142
ACAT1	ENSG00000075239	CYBA	ENSG00000051523			.	.	0.17205
ACAT1	ENSG00000075239	CYBB	ENSG00000165168			.	.	0.22293
ACAT1	ENSG00000075239	CYP11A1	ENSG00000140459			.	.	0.160778
ACAT1	ENSG00000075239	CYP11B1	ENSG00000160882			.	.	0.170155
ACAT1	ENSG00000075239	CYP11B2	ENSG00000179142			.	.	0.111376
ACAT1	ENSG00000075239	CYP27A1	ENSG00000135929			.	.	0.171329
ACAT1	ENSG00000075239	CYP27B1	ENSG00000111012			.	.	0.220514
ACAT1	ENSG00000075239	DBT	ENSG00000137992		BCKDH	.	.	0.196075
ACAT1	ENSG00000075239	DGUOK	ENSG00000114956			.	.	0.276757
ACAT1	ENSG00000075239	DLAT	ENSG00000150768		PDH	246.7	0.371125	0.227643	yes	cluster-1
ACAT1	ENSG00000075239	DLD	ENSG00000091140		AKDH;BCKDH;GCC;PDH;TCA	16.2	0.184415	0.280174	yes	cluster-1
ACAT1	ENSG00000075239	DLST	ENSG00000119689		AKDH;TCA	.	.	0.384343
ACAT1	ENSG00000075239	DMGDH	ENSG00000132837			.	.	0.532794
ACAT1	ENSG00000075239	DMPK	ENSG00000104936			.	.	0.074133
ACAT1	ENSG00000075239	DNAJC19	ENSG00000205981			.	.	0.514925
ACAT1	ENSG00000075239	ECGF1	ENSG00000025708			.	.	0.174798
ACAT1	ENSG00000075239	ETFA	ENSG00000140374			.	.	0.179835
ACAT1	ENSG00000075239	ETFB	ENSG00000105379			.	.	0.146426
ACAT1	ENSG00000075239	ETFDH	ENSG00000171503			.	.	0.256728
ACAT1	ENSG00000075239	ETHE1	ENSG00000105755			.	.	0.271933
ACAT1	ENSG00000075239	FECH	ENSG00000066926			.	.	0.028294
ACAT1	ENSG00000075239	FH	ENSG00000091483		TCA	49.8	0.261412	0.142842	yes	cluster-1
ACAT1	ENSG00000075239	FXN	ENSG00000165060			.	.	0.118312
ACAT1	ENSG00000075239	GATM	ENSG00000171766			.	.	0.228312
ACAT1	ENSG00000075239	GCDH	ENSG00000105607			.	.	0.218191
ACAT1	ENSG00000075239	GCK	ENSG00000106633			.	.	0.203498
ACAT1	ENSG00000075239	GCSH	ENSG00000140905		GCC	.	.	0.187485
ACAT1	ENSG00000075239	GDAP1	ENSG00000104381			.	.	0.140456
ACAT1	ENSG00000075239	GFM1	ENSG00000168827			.	.	0.826889
ACAT1	ENSG00000075239	GK	ENSG00000198814			.	.	0.254142
ACAT1	ENSG00000075239	GLDC	ENSG00000178445		GCC	.	.	0.183943
ACAT1	ENSG00000075239	GLUD1	ENSG00000148672			.	.	0.215934
ACAT1	ENSG00000075239	GPD2	ENSG00000115159			.	.	0.326375
ACAT1	ENSG00000075239	HADH	ENSG00000138796			23.6	0.210211	0.2057	yes	cluster-1
ACAT1	ENSG00000075239	HADHA	ENSG00000084754			231.8	0.366853	0.093766	yes	cluster-1
ACAT1	ENSG00000075239	HADHB	ENSG00000138029			225.1	0.364842	0.150611	yes	cluster-1
ACAT1	ENSG00000075239	HD	ENSG00000197386			.	.	0.072601
ACAT1	ENSG00000075239	HK1	ENSG00000156515			.	.	0.522946
ACAT1	ENSG00000075239	HLCS	ENSG00000159267			.	.	0.247277
ACAT1	ENSG00000075239	HMGCL	ENSG00000117305			4.3	0.093473	0.253497	yes	cluster-1
ACAT1	ENSG00000075239	HMGCS2	ENSG00000134240			2958.9	0.541464	0.255974	yes	cluster-1
ACAT1	ENSG00000075239	HSD17B10	ENSG00000072506			12.9	0.168798	0.443547	yes	cluster-1
ACAT1	ENSG00000075239	HSD3B2	ENSG00000203859			.	.	0.132288
ACAT1	ENSG00000075239	HSPD1	ENSG00000144381			.	.	0.25544
ACAT1	ENSG00000075239	HTRA2	ENSG00000115317			.	.	0.516562
ACAT1	ENSG00000075239	IVD	ENSG00000128928			.	.	0.334166
ACAT1	ENSG00000075239	KIF1B	ENSG00000054523			.	.	0.600685
ACAT1	ENSG00000075239	LRPPRC	ENSG00000138095			.	.	0.416015
ACAT1	ENSG00000075239	LRRK2	ENSG00000188906			.	.	0.120221
ACAT1	ENSG00000075239	MAOA	ENSG00000189221			.	.	0.112723
ACAT1	ENSG00000075239	MCCC1	ENSG00000078070			.	.	0.098249
ACAT1	ENSG00000075239	MCCC2	ENSG00000131844			.	.	0.255552
ACAT1	ENSG00000075239	ME2	ENSG00000082212			.	.	0.418954
ACAT1	ENSG00000075239	MFN2	ENSG00000116688			.	.	0.164245
ACAT1	ENSG00000075239	MLYCD	ENSG00000103150			1.9	0.037473	0.363481	yes	cluster-1
ACAT1	ENSG00000075239	MMAA	ENSG00000151611			.	.	0.305471
ACAT1	ENSG00000075239	MMAB	ENSG00000139428			.	.	0.314663
ACAT1	ENSG00000075239	MPV17	ENSG00000115204			.	.	0.309394
ACAT1	ENSG00000075239	MRPS16	ENSG00000182180			.	.	0.549868
ACAT1	ENSG00000075239	MTHFD1	ENSG00000100714			386.4	0.401889	0.167062	yes	cluster-1
ACAT1	ENSG00000075239	MTRR	ENSG00000124275			.	.	0.119231
ACAT1	ENSG00000075239	MUT	ENSG00000146085			.	.	0.270919
ACAT1	ENSG00000075239	NAGS	ENSG00000161653		UC	.	.	0.210436
ACAT1	ENSG00000075239	NDUFA12L	ENSG00000164182		RCC1	.	.	0.410554
ACAT1	ENSG00000075239	NDUFS1	ENSG00000023228		RCC1	.	.	0.508968
ACAT1	ENSG00000075239	NDUFS2	ENSG00000158864		RCC1	.	.	0.282499
ACAT1	ENSG00000075239	NDUFS3	ENSG00000110536		RCC1	.	.	0.488458
ACAT1	ENSG00000075239	NDUFS4	ENSG00000164258		RCC1	.	.	0.241828
ACAT1	ENSG00000075239	NDUFS6	ENSG00000145494		RCC1	.	.	0.466417
ACAT1	ENSG00000075239	NDUFS7	ENSG00000115286		RCC1	.	.	0.190213
ACAT1	ENSG00000075239	NDUFS8	ENSG00000110717		RCC1	.	.	0.136399
ACAT1	ENSG00000075239	NDUFV1	ENSG00000167792		RCC1	.	.	0.456545
ACAT1	ENSG00000075239	NDUFV2	ENSG00000178127		RCC1	.	.	0.223758
ACAT1	ENSG00000075239	OAT	ENSG00000065154			.	.	0.202413
ACAT1	ENSG00000075239	OGDH	ENSG00000105953		AKDH;TCA	.	.	0.501753
ACAT1	ENSG00000075239	OPA1	ENSG00000198836			.	.	0.187978
ACAT1	ENSG00000075239	OPA3	ENSG00000125741			.	.	0.495167
ACAT1	ENSG00000075239	OTC	ENSG00000036473		UC	.	.	0.22167
ACAT1	ENSG00000075239	OXCT1	ENSG00000083720			6.4	0.120739	0.309628	yes	cluster-1
ACAT1	ENSG00000075239	PANK2	ENSG00000125779			.	.	0.238835
ACAT1	ENSG00000075239	PARK7	ENSG00000116288			.	.	0.090942
ACAT1	ENSG00000075239	PARL	ENSG00000175193			.	.	0.540348
ACAT1	ENSG00000075239	PC	ENSG00000173599			.	.	0.249227
ACAT1	ENSG00000075239	PCCA	ENSG00000175198			1	.	0.370396
ACAT1	ENSG00000075239	PCCB	ENSG00000114054			30.1	0.226891	0.224653	yes	cluster-1
ACAT1	ENSG00000075239	PCK2	ENSG00000100889			.	.	0.685167
ACAT1	ENSG00000075239	PDHA1	ENSG00000131828		PDH;TCA	10.8	0.156615	0.264086	yes	cluster-1
ACAT1	ENSG00000075239	PDHB	ENSG00000168291		PDH	9.3	0.146363	0.505162	yes	cluster-3
ACAT1	ENSG00000075239	PDHX	ENSG00000110435		PDH	48.3	0.259315	0.217311	yes	cluster-1
ACAT1	ENSG00000075239	PEO1	ENSG00000107815			.	.	0.083987
ACAT1	ENSG00000075239	PINK1	ENSG00000158828			.	.	0.136168
ACAT1	ENSG00000075239	POLG	ENSG00000140521			.	.	0.109466
ACAT1	ENSG00000075239	POLG2	ENSG00000136480			.	.	0.383341
ACAT1	ENSG00000075239	PPOX	ENSG00000143224			.	.	0.131864
ACAT1	ENSG00000075239	PRODH	ENSG00000100033			.	.	0.200587
ACAT1	ENSG00000075239	PUS1	ENSG00000177192			.	.	0.505014
ACAT1	ENSG00000075239	RMRP	ENSG00000199916			.	.	0.148593
ACAT1	ENSG00000075239	SCO1	ENSG00000133028		RCC4	.	.	0.545
ACAT1	ENSG00000075239	SCO2	ENSG00000130489		RCC4	.	.	0.396192
ACAT1	ENSG00000075239	SDHA	ENSG00000073578		RCC2;TCA	.	.	0.098482
ACAT1	ENSG00000075239	SDHB	ENSG00000117118		RCC2;TCA	.	.	0.044003
ACAT1	ENSG00000075239	SDHC	ENSG00000143252		RCC2;TCA	.	.	0.04991
ACAT1	ENSG00000075239	SDHD	ENSG00000204370		RCC2;TCA	.	.	0.035087
ACAT1	ENSG00000075239	SLC19A2	ENSG00000117479			.	.	0.178283
ACAT1	ENSG00000075239	SLC25A13	ENSG00000004864		UC	.	.	0.174248
ACAT1	ENSG00000075239	SLC25A15	ENSG00000102743		UC	.	.	0.193765
ACAT1	ENSG00000075239	SLC25A16	ENSG00000122912			.	.	0.203557
ACAT1	ENSG00000075239	SLC25A19	ENSG00000125454			.	.	0.461189
ACAT1	ENSG00000075239	SLC25A20	ENSG00000178537			.	.	0.102928
ACAT1	ENSG00000075239	SLC25A22	ENSG00000177542			.	.	0.167949
ACAT1	ENSG00000075239	SLC25A4	ENSG00000151729			.	.	0.210256
ACAT1	ENSG00000075239	SOD1	ENSG00000142168			386.4	0.401889	0.17379	yes	cluster-1
ACAT1	ENSG00000075239	SPAST	ENSG00000021574			.	.	0.102074
ACAT1	ENSG00000075239	SPG7	ENSG00000197912			.	.	0.123048
ACAT1	ENSG00000075239	STAR	ENSG00000147465			.	.	0.150179
ACAT1	ENSG00000075239	SUCLA2	ENSG00000136143		TCA	.	.	0.479916
ACAT1	ENSG00000075239	SUOX	ENSG00000139531			.	.	0.128551
ACAT1	ENSG00000075239	SURF1	ENSG00000148290		RCC4	.	.	0.208915
ACAT1	ENSG00000075239	TAT	ENSG00000198650			.	.	0.30633
ACAT1	ENSG00000075239	TAZ	ENSG00000102125			.	.	0.287595
ACAT1	ENSG00000075239	TIMM8A	ENSG00000126953			.	.	0.092793
ACAT1	ENSG00000075239	TK2	ENSG00000166548			.	.	0.242557
ACAT1	ENSG00000075239	TP53	ENSG00000141510			.	.	0.036095
ACAT1	ENSG00000075239	UCP1	ENSG00000109424			.	.	0.443922
ACAT1	ENSG00000075239	UCP2	ENSG00000175567			.	.	0.377699
ACAT1	ENSG00000075239	UCP3	ENSG00000175564			.	.	0.537461
ACAT1	ENSG00000075239	UNG	ENSG00000076248			.	.	0.509738
ACAT1	ENSG00000075239	UQCRB	ENSG00000156467			.	.	0.303125
ACAT1	ENSG00000075239	UROS	ENSG00000188690			.	.	0.199371
ACAT1	ENSG00000075239	WFS1	ENSG00000109501			.	.	0.176725
ACSL4	ENSG00000068366	AASS	ENSG00000008311			.	.	0.424331
ACSL4	ENSG00000068366	ABAT	ENSG00000183044			.	.	0.454826
ACSL4	ENSG00000068366	ABCB7	ENSG00000131269			.	.	0.239106
ACSL4	ENSG00000068366	ABCD1	ENSG00000101986			.	.	0.154105
ACSL4	ENSG00000068366	ACADL	ENSG00000115361			5	0.103814	0.157393	yes	cluster-1
ACSL4	ENSG00000068366	ACADM	ENSG00000117054			14.2	0.175381	0.203496	yes	cluster-1
ACSL4	ENSG00000068366	ACADS	ENSG00000122971			.	.	0.135592
ACSL4	ENSG00000068366	ACADSB	ENSG00000196177			.	.	0.195774
ACSL4	ENSG00000068366	ACADVL	ENSG00000072778			.	.	0.151776
ACSL4	ENSG00000068366	ACAT1	ENSG00000075239			.	.	0.211011
ACSL4	ENSG00000068366	ACSL6	ENSG00000164398			151.5	0.337694	0.284796	yes	cluster-1
ACSL4	ENSG00000068366	AGXT	ENSG00000172482			.	.	0.155551
ACSL4	ENSG00000068366	ALAS2	ENSG00000158578			.	.	0.380437
ACSL4	ENSG00000068366	ALDH18A1	ENSG00000059573			57.3	0.271031	0.550841	yes	cluster-3
ACSL4	ENSG00000068366	ALDH2	ENSG00000111275			.	.	0.350349
ACSL4	ENSG00000068366	ALDH4A1	ENSG00000159423			.	.	0.162117
ACSL4	ENSG00000068366	ALDH5A1	ENSG00000112294			.	.	0.338178
ACSL4	ENSG00000068366	ALDH6A1	ENSG00000119711			.	.	0.303365
ACSL4	ENSG00000068366	AMACR	ENSG00000082196			.	.	0.22864
ACSL4	ENSG00000068366	AMT	ENSG00000145020		GCC	.	.	0.3778
ACSL4	ENSG00000068366	ATP7B	ENSG00000123191			.	.	0.074697
ACSL4	ENSG00000068366	ATPAF2	ENSG00000171953			.	.	0.55371
ACSL4	ENSG00000068366	AUH	ENSG00000148090			.	.	0.181733
ACSL4	ENSG00000068366	BCKDHA	ENSG00000142046		BCKDH	.	.	0.155438
ACSL4	ENSG00000068366	BCKDHB	ENSG00000083123		BCKDH	.	.	0.338025
ACSL4	ENSG00000068366	BCS1L	ENSG00000074582			.	.	0.153571
ACSL4	ENSG00000068366	CLN3	ENSG00000188603			.	.	0.145753
ACSL4	ENSG00000068366	COX10	ENSG00000006695		RCC4	.	.	0.261863
ACSL4	ENSG00000068366	COX15	ENSG00000014919		RCC4	.	.	0.294823
ACSL4	ENSG00000068366	CPOX	ENSG00000080819			.	.	0.082819
ACSL4	ENSG00000068366	CPS1	ENSG00000021826		UC	.	.	0.23743
ACSL4	ENSG00000068366	CPT1A	ENSG00000110090			10.7	0.155977	0.211615	yes	cluster-1
ACSL4	ENSG00000068366	CPT2	ENSG00000157184			2.9	0.066465	0.227819	yes	cluster-1
ACSL4	ENSG00000068366	CYB5R3	ENSG00000100243			.	.	0.163057
ACSL4	ENSG00000068366	CYBA	ENSG00000051523			.	.	0.082579
ACSL4	ENSG00000068366	CYBB	ENSG00000165168			.	.	0.163207
ACSL4	ENSG00000068366	CYP11A1	ENSG00000140459			.	.	0.463139
ACSL4	ENSG00000068366	CYP11B1	ENSG00000160882			.	.	0.205221
ACSL4	ENSG00000068366	CYP11B2	ENSG00000179142			.	.	0.356896
ACSL4	ENSG00000068366	CYP27A1	ENSG00000135929			.	.	0.240098
ACSL4	ENSG00000068366	CYP27B1	ENSG00000111012			.	.	0.287032
ACSL4	ENSG00000068366	DBT	ENSG00000137992		BCKDH	.	.	0.394377
ACSL4	ENSG00000068366	DGUOK	ENSG00000114956			.	.	0.195207
ACSL4	ENSG00000068366	DLAT	ENSG00000150768		PDH	.	.	0.069449
ACSL4	ENSG00000068366	DLD	ENSG00000091140		AKDH;BCKDH;GCC;PDH;TCA	.	.	0.132744
ACSL4	ENSG00000068366	DLST	ENSG00000119689		AKDH;TCA	.	.	0.248831
ACSL4	ENSG00000068366	DMGDH	ENSG00000132837			.	.	0.5
ACSL4	ENSG00000068366	DMPK	ENSG00000104936			.	.	0.095228
ACSL4	ENSG00000068366	DNAJC19	ENSG00000205981			.	.	0.897609
ACSL4	ENSG00000068366	ECGF1	ENSG00000025708			.	.	0.312935
ACSL4	ENSG00000068366	ETFA	ENSG00000140374			.	.	0.151934
ACSL4	ENSG00000068366	ETFB	ENSG00000105379			.	.	0.212873
ACSL4	ENSG00000068366	ETFDH	ENSG00000171503			.	.	0.139223
ACSL4	ENSG00000068366	ETHE1	ENSG00000105755			.	.	0.21185
ACSL4	ENSG00000068366	FECH	ENSG00000066926			60	0.274188	0.330447	yes	cluster-1
ACSL4	ENSG00000068366	FH	ENSG00000091483		TCA	.	.	0.150071
ACSL4	ENSG00000068366	FXN	ENSG00000165060			.	.	0.164222
ACSL4	ENSG00000068366	GATM	ENSG00000171766			.	.	0.362318
ACSL4	ENSG00000068366	GCDH	ENSG00000105607			.	.	0.231486
ACSL4	ENSG00000068366	GCK	ENSG00000106633			.	.	0.264724
ACSL4	ENSG00000068366	GCSH	ENSG00000140905		GCC	.	.	0.446401
ACSL4	ENSG00000068366	GDAP1	ENSG00000104381			.	.	0.274095
ACSL4	ENSG00000068366	GFM1	ENSG00000168827			.	.	0.501652
ACSL4	ENSG00000068366	GK	ENSG00000198814			.	.	0.21274
ACSL4	ENSG00000068366	GLDC	ENSG00000178445		GCC	.	.	0.216968
ACSL4	ENSG00000068366	GLUD1	ENSG00000148672			.	.	0.248481
ACSL4	ENSG00000068366	GPD2	ENSG00000115159			.	.	0.5
ACSL4	ENSG00000068366	HADH	ENSG00000138796			.	.	0.142089
ACSL4	ENSG00000068366	HADHA	ENSG00000084754			.	.	0.123169
ACSL4	ENSG00000068366	HADHB	ENSG00000138029			.	.	0.165672
ACSL4	ENSG00000068366	HD	ENSG00000197386			.	.	0.15507
ACSL4	ENSG00000068366	HK1	ENSG00000156515			.	.	0.257151
ACSL4	ENSG00000068366	HLCS	ENSG00000159267			.	.	0.133401
ACSL4	ENSG00000068366	HMGCL	ENSG00000117305			.	.	0.229805
ACSL4	ENSG00000068366	HMGCS2	ENSG00000134240			.	.	0.471771
ACSL4	ENSG00000068366	HSD17B10	ENSG00000072506			.	.	0.21688
ACSL4	ENSG00000068366	HSD3B2	ENSG00000203859			.	.	0.209664
ACSL4	ENSG00000068366	HSPD1	ENSG00000144381			.	.	0.516496
ACSL4	ENSG00000068366	HTRA2	ENSG00000115317			.	.	0.726115
ACSL4	ENSG00000068366	IVD	ENSG00000128928			.	.	0.285704
ACSL4	ENSG00000068366	KIF1B	ENSG00000054523			.	.	0.501983
ACSL4	ENSG00000068366	LRPPRC	ENSG00000138095			.	.	0.415915
ACSL4	ENSG00000068366	LRRK2	ENSG00000188906			.	.	0.131931
ACSL4	ENSG00000068366	MAOA	ENSG00000189221			.	.	0.240106
ACSL4	ENSG00000068366	MCCC1	ENSG00000078070			.	.	0.165431
ACSL4	ENSG00000068366	MCCC2	ENSG00000131844			111.6	0.316737	0.169288	yes	cluster-1
ACSL4	ENSG00000068366	ME2	ENSG00000082212			168.1	0.344823	0.885055	yes	cluster-2
ACSL4	ENSG00000068366	MFN2	ENSG00000116688			.	.	0.270625
ACSL4	ENSG00000068366	MLYCD	ENSG00000103150			.	.	0.292324
ACSL4	ENSG00000068366	MMAA	ENSG00000151611			.	.	0.272269
ACSL4	ENSG00000068366	MMAB	ENSG00000139428			.	.	0.372414
ACSL4	ENSG00000068366	MPV17	ENSG00000115204			.	.	0.194652
ACSL4	ENSG00000068366	MRPS16	ENSG00000182180			.	.	0.657583
ACSL4	ENSG00000068366	MTHFD1	ENSG00000100714			66.6	0.281343	0.358808	yes	cluster-1
ACSL4	ENSG00000068366	MTRR	ENSG00000124275			.	.	0.164288
ACSL4	ENSG00000068366	MUT	ENSG00000146085			.	.	0.089632
ACSL4	ENSG00000068366	NAGS	ENSG00000161653		UC	.	.	0.447068
ACSL4	ENSG00000068366	NDUFA12L	ENSG00000164182		RCC1	.	.	0.507513
ACSL4	ENSG00000068366	NDUFS1	ENSG00000023228		RCC1	.	.	0.289332
ACSL4	ENSG00000068366	NDUFS2	ENSG00000158864		RCC1	.	.	0.236223
ACSL4	ENSG00000068366	NDUFS3	ENSG00000110536		RCC1	.	.	0.502308
ACSL4	ENSG00000068366	NDUFS4	ENSG00000164258		RCC1	.	.	0.223241
ACSL4	ENSG00000068366	NDUFS6	ENSG00000145494		RCC1	.	.	0.54624
ACSL4	ENSG00000068366	NDUFS7	ENSG00000115286		RCC1	.	.	0.331304
ACSL4	ENSG00000068366	NDUFS8	ENSG00000110717		RCC1	.	.	0.244708
ACSL4	ENSG00000068366	NDUFV1	ENSG00000167792		RCC1	.	.	0.244343
ACSL4	ENSG00000068366	NDUFV2	ENSG00000178127		RCC1	.	.	0.410958
ACSL4	ENSG00000068366	OAT	ENSG00000065154			.	.	0.154282
ACSL4	ENSG00000068366	OGDH	ENSG00000105953		AKDH;TCA	49.2	0.260581	0.260223	yes	cluster-1
ACSL4	ENSG00000068366	OPA1	ENSG00000198836			.	.	0.249132
ACSL4	ENSG00000068366	OPA3	ENSG00000125741			.	.	0.235104
ACSL4	ENSG00000068366	OTC	ENSG00000036473		UC	.	.	0.152595
ACSL4	ENSG00000068366	OXCT1	ENSG00000083720			.	.	0.258368
ACSL4	ENSG00000068366	PANK2	ENSG00000125779			.	.	0.256583
ACSL4	ENSG00000068366	PARK7	ENSG00000116288			.	.	0.276401
ACSL4	ENSG00000068366	PARL	ENSG00000175193			.	.	0.5
ACSL4	ENSG00000068366	PC	ENSG00000173599			569.7	0.428508	0.176547	yes	cluster-1
ACSL4	ENSG00000068366	PCCA	ENSG00000175198			119.7	0.321541	0.123084	yes	cluster-1
ACSL4	ENSG00000068366	PCCB	ENSG00000114054			508.4	0.420703	0.110084	yes	cluster-1
ACSL4	ENSG00000068366	PCK2	ENSG00000100889			.	.	0.5
ACSL4	ENSG00000068366	PDHA1	ENSG00000131828		PDH;TCA	.	.	0.126253
ACSL4	ENSG00000068366	PDHB	ENSG00000168291		PDH	.	.	0.505788
ACSL4	ENSG00000068366	PDHX	ENSG00000110435		PDH	.	.	0.170545
ACSL4	ENSG00000068366	PEO1	ENSG00000107815			.	.	0.189623
ACSL4	ENSG00000068366	PINK1	ENSG00000158828			.	.	0.250382
ACSL4	ENSG00000068366	POLG	ENSG00000140521			.	.	0.153745
ACSL4	ENSG00000068366	POLG2	ENSG00000136480			.	.	0.505457
ACSL4	ENSG00000068366	PPOX	ENSG00000143224			.	.	0.10332
ACSL4	ENSG00000068366	PRODH	ENSG00000100033			.	.	0.375604
ACSL4	ENSG00000068366	PUS1	ENSG00000177192			.	.	0.425213
ACSL4	ENSG00000068366	RMRP	ENSG00000199916			.	.	0.282447
ACSL4	ENSG00000068366	SCO1	ENSG00000133028		RCC4	.	.	0.657583
ACSL4	ENSG00000068366	SCO2	ENSG00000130489		RCC4	.	.	0.149169
ACSL4	ENSG00000068366	SDHA	ENSG00000073578		RCC2;TCA	.	.	0.126491
ACSL4	ENSG00000068366	SDHB	ENSG00000117118		RCC2;TCA	.	.	0.155908
ACSL4	ENSG00000068366	SDHC	ENSG00000143252		RCC2;TCA	.	.	0.126543
ACSL4	ENSG00000068366	SDHD	ENSG00000204370		RCC2;TCA	.	.	0.158489
ACSL4	ENSG00000068366	SLC19A2	ENSG00000117479			.	.	0.139813
ACSL4	ENSG00000068366	SLC25A13	ENSG00000004864		UC	.	.	0.200618
ACSL4	ENSG00000068366	SLC25A15	ENSG00000102743		UC	.	.	0.30656
ACSL4	ENSG00000068366	SLC25A16	ENSG00000122912			.	.	0.948281
ACSL4	ENSG00000068366	SLC25A19	ENSG00000125454			.	.	0.506459
ACSL4	ENSG00000068366	SLC25A20	ENSG00000178537			.	.	0.122091
ACSL4	ENSG00000068366	SLC25A22	ENSG00000177542			.	.	0.501564
ACSL4	ENSG00000068366	SLC25A4	ENSG00000151729			.	.	0.309645
ACSL4	ENSG00000068366	SOD1	ENSG00000142168			.	.	0.2856
ACSL4	ENSG00000068366	SPAST	ENSG00000021574			.	.	0.174557
ACSL4	ENSG00000068366	SPG7	ENSG00000197912			.	.	0.213125
ACSL4	ENSG00000068366	STAR	ENSG00000147465			.	.	0.179373
ACSL4	ENSG00000068366	SUCLA2	ENSG00000136143		TCA	52.6	0.265163	0.662602	yes	cluster-3
ACSL4	ENSG00000068366	SUOX	ENSG00000139531			.	.	0.236683
ACSL4	ENSG00000068366	SURF1	ENSG00000148290		RCC4	.	.	0.13952
ACSL4	ENSG00000068366	TAT	ENSG00000198650			.	.	0.923009
ACSL4	ENSG00000068366	TAZ	ENSG00000102125			.	.	0.239422
ACSL4	ENSG00000068366	TIMM8A	ENSG00000126953			.	.	0.247395
ACSL4	ENSG00000068366	TK2	ENSG00000166548			.	.	0.147227
ACSL4	ENSG00000068366	TP53	ENSG00000141510			.	.	0.032205
ACSL4	ENSG00000068366	UCP1	ENSG00000109424			.	.	0.375
ACSL4	ENSG00000068366	UCP2	ENSG00000175567			.	.	0.5
ACSL4	ENSG00000068366	UCP3	ENSG00000175564			.	.	0.5
ACSL4	ENSG00000068366	UQCRB	ENSG00000156467			.	.	0.5
ACSL4	ENSG00000068366	UROS	ENSG00000188690			.	.	0.079714
ACSL4	ENSG00000068366	WFS1	ENSG00000109501			.	.	0.140406
ACSL6	ENSG00000164398	AASS	ENSG00000008311			.	.	0.16151
ACSL6	ENSG00000164398	ABAT	ENSG00000183044			.	.	0.121775
ACSL6	ENSG00000164398	ABCB7	ENSG00000131269			.	.	0.751342
ACSL6	ENSG00000164398	ABCD1	ENSG00000101986			.	.	0.08751
ACSL6	ENSG00000164398	ACADL	ENSG00000115361			3.3	0.075325	0.339561	yes	cluster-1
ACSL6	ENSG00000164398	ACADM	ENSG00000117054			3	0.06879	0.134881	yes	cluster-1
ACSL6	ENSG00000164398	ACADS	ENSG00000122971			.	.	0.149102
ACSL6	ENSG00000164398	ACADSB	ENSG00000196177			.	.	0.237172
ACSL6	ENSG00000164398	ACADVL	ENSG00000072778			.	.	0.161811
ACSL6	ENSG00000164398	ACAT1	ENSG00000075239			.	.	0.254746
ACSL6	ENSG00000164398	ACSL4	ENSG00000068366			151.5	0.337694	0.284796	yes	cluster-1
ACSL6	ENSG00000164398	AGXT	ENSG00000172482			.	.	0.122212
ACSL6	ENSG00000164398	ALAS2	ENSG00000158578			.	.	0.653237
ACSL6	ENSG00000164398	ALDH18A1	ENSG00000059573			.	.	0.327608
ACSL6	ENSG00000164398	ALDH2	ENSG00000111275			.	.	0.25
ACSL6	ENSG00000164398	ALDH4A1	ENSG00000159423			.	.	0.155283
ACSL6	ENSG00000164398	ALDH5A1	ENSG00000112294			.	.	0.056917
ACSL6	ENSG00000164398	ALDH6A1	ENSG00000119711			.	.	0.125
ACSL6	ENSG00000164398	AMACR	ENSG00000082196			.	.	0.198887
ACSL6	ENSG00000164398	AMT	ENSG00000145020		GCC	.	.	0.567357
ACSL6	ENSG00000164398	ATP7B	ENSG00000123191			.	.	0.099988
ACSL6	ENSG00000164398	ATPAF2	ENSG00000171953			.	.	0.5
ACSL6	ENSG00000164398	AUH	ENSG00000148090			.	.	0.122872
ACSL6	ENSG00000164398	BAX	ENSG00000087088			.	.	0.4328
ACSL6	ENSG00000164398	BCKDHA	ENSG00000142046		BCKDH	.	.	0.106251
ACSL6	ENSG00000164398	BCKDHB	ENSG00000083123		BCKDH	.	.	0.146472
ACSL6	ENSG00000164398	BCL2	ENSG00000171791			.	.	0.648956
ACSL6	ENSG00000164398	BCS1L	ENSG00000074582			.	.	0.252242
ACSL6	ENSG00000164398	CASP8	ENSG00000064012			.	.	0.21701
ACSL6	ENSG00000164398	CLN3	ENSG00000188603			.	.	0.124622
ACSL6	ENSG00000164398	COX10	ENSG00000006695		RCC4	.	.	0.252734
ACSL6	ENSG00000164398	COX15	ENSG00000014919		RCC4	.	.	0.172772
ACSL6	ENSG00000164398	CPOX	ENSG00000080819			.	.	0.11633
ACSL6	ENSG00000164398	CPS1	ENSG00000021826		UC	.	.	0.1838
ACSL6	ENSG00000164398	CPT1A	ENSG00000110090			3.7	0.083169	0.244984	yes	cluster-1
ACSL6	ENSG00000164398	CPT2	ENSG00000157184			2.9	0.066465	0.11795	yes	cluster-1
ACSL6	ENSG00000164398	CYB5A	ENSG00000166347			.	.	1
ACSL6	ENSG00000164398	CYB5R3	ENSG00000100243			.	.	0.055716
ACSL6	ENSG00000164398	CYBA	ENSG00000051523			.	.	0.254541
ACSL6	ENSG00000164398	CYBB	ENSG00000165168			.	.	0.315945
ACSL6	ENSG00000164398	CYP11A1	ENSG00000140459			.	.	0.261154
ACSL6	ENSG00000164398	CYP11B1	ENSG00000160882			.	.	0.037304
ACSL6	ENSG00000164398	CYP11B2	ENSG00000179142			.	.	0.096103
ACSL6	ENSG00000164398	CYP27A1	ENSG00000135929			.	.	0.210087
ACSL6	ENSG00000164398	CYP27B1	ENSG00000111012			.	.	0.262332
ACSL6	ENSG00000164398	DBT	ENSG00000137992		BCKDH	.	.	0.256945
ACSL6	ENSG00000164398	DGUOK	ENSG00000114956			.	.	0.306264
ACSL6	ENSG00000164398	DLAT	ENSG00000150768		PDH	.	.	0.181652
ACSL6	ENSG00000164398	DLD	ENSG00000091140		AKDH;BCKDH;GCC;PDH;TCA	.	.	0.240594
ACSL6	ENSG00000164398	DLST	ENSG00000119689		AKDH;TCA	.	.	0.127447
ACSL6	ENSG00000164398	DMPK	ENSG00000104936			.	.	0.105437
ACSL6	ENSG00000164398	DNAJC19	ENSG00000205981			.	.	0.69051
ACSL6	ENSG00000164398	ECGF1	ENSG00000025708			.	.	0.209526
ACSL6	ENSG00000164398	ETFA	ENSG00000140374			.	.	0.138772
ACSL6	ENSG00000164398	ETFB	ENSG00000105379			.	.	0.154697
ACSL6	ENSG00000164398	ETFDH	ENSG00000171503			.	.	0.217237
ACSL6	ENSG00000164398	ETHE1	ENSG00000105755			.	.	0.449211
ACSL6	ENSG00000164398	FECH	ENSG00000066926			.	.	0.051867
ACSL6	ENSG00000164398	FH	ENSG00000091483		TCA	.	.	0.101828
ACSL6	ENSG00000164398	FXN	ENSG00000165060			.	.	0.036933
ACSL6	ENSG00000164398	GATM	ENSG00000171766			.	.	0.42359
ACSL6	ENSG00000164398	GCDH	ENSG00000105607			.	.	0.131589
ACSL6	ENSG00000164398	GCK	ENSG00000106633			.	.	0.043482
ACSL6	ENSG00000164398	GCSH	ENSG00000140905		GCC	.	.	0.412139
ACSL6	ENSG00000164398	GDAP1	ENSG00000104381			.	.	0.079083
ACSL6	ENSG00000164398	GFM1	ENSG00000168827			.	.	0.5
ACSL6	ENSG00000164398	GK	ENSG00000198814			.	.	0.126183
ACSL6	ENSG00000164398	GLDC	ENSG00000178445		GCC	.	.	0.217393
ACSL6	ENSG00000164398	GLUD1	ENSG00000148672			.	.	0.103323
ACSL6	ENSG00000164398	HADH	ENSG00000138796			.	.	0.134644
ACSL6	ENSG00000164398	HADHA	ENSG00000084754			.	.	0.185582
ACSL6	ENSG00000164398	HADHB	ENSG00000138029			.	.	0.160095
ACSL6	ENSG00000164398	HD	ENSG00000197386			.	.	0.072707
ACSL6	ENSG00000164398	HK1	ENSG00000156515			.	.	0.445946
ACSL6	ENSG00000164398	HLCS	ENSG00000159267			.	.	0.37527
ACSL6	ENSG00000164398	HMGCL	ENSG00000117305			.	.	0.306007
ACSL6	ENSG00000164398	HMGCS2	ENSG00000134240			.	.	0.311999
ACSL6	ENSG00000164398	HSD17B10	ENSG00000072506			.	.	0.388905
ACSL6	ENSG00000164398	HSD3B2	ENSG00000203859			.	.	0.132643
ACSL6	ENSG00000164398	HSPD1	ENSG00000144381			.	.	0.5
ACSL6	ENSG00000164398	HTRA2	ENSG00000115317			.	.	0.5
ACSL6	ENSG00000164398	IVD	ENSG00000128928			.	.	0.177786
ACSL6	ENSG00000164398	KIF1B	ENSG00000054523			.	.	0.5
ACSL6	ENSG00000164398	LRPPRC	ENSG00000138095			.	.	0.463066
ACSL6	ENSG00000164398	LRRK2	ENSG00000188906			.	.	0.367708
ACSL6	ENSG00000164398	MAOA	ENSG00000189221			.	.	0.142857
ACSL6	ENSG00000164398	MCCC1	ENSG00000078070			.	.	0.101273
ACSL6	ENSG00000164398	MCCC2	ENSG00000131844			.	.	0.089287
ACSL6	ENSG00000164398	ME2	ENSG00000082212			.	.	0.5
ACSL6	ENSG00000164398	MFN2	ENSG00000116688			.	.	0.100657
ACSL6	ENSG00000164398	MLYCD	ENSG00000103150			51.3	0.263447	0.10932	yes	cluster-1
ACSL6	ENSG00000164398	MMAA	ENSG00000151611			.	.	0.131293
ACSL6	ENSG00000164398	MMAB	ENSG00000139428			.	.	0.304551
ACSL6	ENSG00000164398	MPV17	ENSG00000115204			.	.	0.275654
ACSL6	ENSG00000164398	MRPS16	ENSG00000182180			.	.	0.5
ACSL6	ENSG00000164398	MTCP1	ENSG00000182712			.	.	0.697372
ACSL6	ENSG00000164398	MTHFD1	ENSG00000100714			.	.	0.072698
ACSL6	ENSG00000164398	MTRR	ENSG00000124275			.	.	0.362498
ACSL6	ENSG00000164398	MUT	ENSG00000146085			.	.	0.118229
ACSL6	ENSG00000164398	NAGS	ENSG00000161653		UC	.	.	0.155317
ACSL6	ENSG00000164398	NDUFA12L	ENSG00000164182		RCC1	.	.	0.574188
ACSL6	ENSG00000164398	NDUFS1	ENSG00000023228		RCC1	.	.	0.232465
ACSL6	ENSG00000164398	NDUFS2	ENSG00000158864		RCC1	.	.	0.276816
ACSL6	ENSG00000164398	NDUFS3	ENSG00000110536		RCC1	.	.	0.789155
ACSL6	ENSG00000164398	NDUFS4	ENSG00000164258		RCC1	.	.	0.352779
ACSL6	ENSG00000164398	NDUFS6	ENSG00000145494		RCC1	.	.	0.797424
ACSL6	ENSG00000164398	NDUFS7	ENSG00000115286		RCC1	.	.	0.403865
ACSL6	ENSG00000164398	NDUFS8	ENSG00000110717		RCC1	.	.	0.235518
ACSL6	ENSG00000164398	NDUFV1	ENSG00000167792		RCC1	.	.	0.214415
ACSL6	ENSG00000164398	NDUFV2	ENSG00000178127		RCC1	.	.	0.166667
ACSL6	ENSG00000164398	OAT	ENSG00000065154			.	.	0.043033
ACSL6	ENSG00000164398	OGDH	ENSG00000105953		AKDH;TCA	.	.	0.229355
ACSL6	ENSG00000164398	OGG1	ENSG00000114026			.	.	1
ACSL6	ENSG00000164398	OPA1	ENSG00000198836			.	.	0.092846
ACSL6	ENSG00000164398	OPA3	ENSG00000125741			.	.	0.365626
ACSL6	ENSG00000164398	OTC	ENSG00000036473		UC	.	.	0.031874
ACSL6	ENSG00000164398	OXCT1	ENSG00000083720			.	.	0.436849
ACSL6	ENSG00000164398	PANK2	ENSG00000125779			.	.	0.266785
ACSL6	ENSG00000164398	PARK7	ENSG00000116288			.	.	0.35042
ACSL6	ENSG00000164398	PC	ENSG00000173599			.	.	0.192407
ACSL6	ENSG00000164398	PCCA	ENSG00000175198			198.7	0.356289	0.118528	yes	cluster-1
ACSL6	ENSG00000164398	PCCB	ENSG00000114054			131.9	0.328195	0.172389	yes	cluster-1
ACSL6	ENSG00000164398	PCK2	ENSG00000100889			.	.	0.5
ACSL6	ENSG00000164398	PDHA1	ENSG00000131828		PDH;TCA	.	.	0.13492
ACSL6	ENSG00000164398	PDHB	ENSG00000168291		PDH	.	.	0.797424
ACSL6	ENSG00000164398	PDHX	ENSG00000110435		PDH	.	.	0.220894
ACSL6	ENSG00000164398	PEO1	ENSG00000107815			.	.	0.137429
ACSL6	ENSG00000164398	PHB	ENSG00000167085			.	.	1
ACSL6	ENSG00000164398	PINK1	ENSG00000158828			.	.	0.5
ACSL6	ENSG00000164398	POLG	ENSG00000140521			.	.	0.094028
ACSL6	ENSG00000164398	POLG2	ENSG00000136480			.	.	0.5
ACSL6	ENSG00000164398	PPOX	ENSG00000143224			.	.	0.21612
ACSL6	ENSG00000164398	PRODH	ENSG00000100033			.	.	0.142857
ACSL6	ENSG00000164398	PUS1	ENSG00000177192			.	.	0.485863
ACSL6	ENSG00000164398	RMRP	ENSG00000199916			.	.	0.241634
ACSL6	ENSG00000164398	RNASEL	ENSG00000135828			.	.	1
ACSL6	ENSG00000164398	SCO1	ENSG00000133028		RCC4	.	.	0.620874
ACSL6	ENSG00000164398	SCO2	ENSG00000130489		RCC4	.	.	0.512895
ACSL6	ENSG00000164398	SDHA	ENSG00000073578		RCC2;TCA	.	.	0.080335
ACSL6	ENSG00000164398	SDHB	ENSG00000117118		RCC2;TCA	.	.	0.254764
ACSL6	ENSG00000164398	SDHC	ENSG00000143252		RCC2;TCA	.	.	0.945979
ACSL6	ENSG00000164398	SDHD	ENSG00000204370		RCC2;TCA	.	.	0.424303
ACSL6	ENSG00000164398	SLC19A2	ENSG00000117479			.	.	0.45358
ACSL6	ENSG00000164398	SLC25A13	ENSG00000004864		UC	.	.	0.216086
ACSL6	ENSG00000164398	SLC25A15	ENSG00000102743		UC	.	.	0.094879
ACSL6	ENSG00000164398	SLC25A16	ENSG00000122912			.	.	0.5
ACSL6	ENSG00000164398	SLC25A19	ENSG00000125454			.	.	0.58483
ACSL6	ENSG00000164398	SLC25A20	ENSG00000178537			.	.	0.240017
ACSL6	ENSG00000164398	SLC25A22	ENSG00000177542			.	.	0.5
ACSL6	ENSG00000164398	SLC25A4	ENSG00000151729			.	.	0.12668
ACSL6	ENSG00000164398	SOD1	ENSG00000142168			.	.	0.294261
ACSL6	ENSG00000164398	SPAST	ENSG00000021574			.	.	0.044447
ACSL6	ENSG00000164398	SPG7	ENSG00000197912			.	.	0.290989
ACSL6	ENSG00000164398	STAR	ENSG00000147465			.	.	0.233981
ACSL6	ENSG00000164398	SUCLA2	ENSG00000136143		TCA	.	.	0.610139
ACSL6	ENSG00000164398	SUOX	ENSG00000139531			.	.	0.19464
ACSL6	ENSG00000164398	SURF1	ENSG00000148290		RCC4	.	.	0.265041
ACSL6	ENSG00000164398	TAT	ENSG00000198650			.	.	0.315641
ACSL6	ENSG00000164398	TAZ	ENSG00000102125			.	.	0.336263
ACSL6	ENSG00000164398	TIMM8A	ENSG00000126953			.	.	0.067957
ACSL6	ENSG00000164398	TK2	ENSG00000166548			.	.	0.296438
ACSL6	ENSG00000164398	TP53	ENSG00000141510			.	.	0.047626
ACSL6	ENSG00000164398	UNG	ENSG00000076248			.	.	0.660911
[truncated: 26,021 more rows]
