# Supplementary material for: Mapping Gene Associations in Human Mitochondria using Clinical Disease Phenotypes
Source: PLoS Comput Biol. 2009 Apr 24;5(4):e1000374. doi: 10.1371/journal.pcbi.1000374 (PMC2668170; doi:10.1371/journal.pcbi.1000374)
Supplement: Table S5 — 4,739 genes in functional network analysis and their 5 interaction attributes (0.54 MB XLS) [file pcbi.1000374.s008.xls]

## Sheet: TableS5
ENSEMBL-GENE	GROUP-LABEL(Table2)	i(all-genes)	i(disease-genes)	i(mouse-essential)	i(yeast-essential)	i(mito-genes)
ENSG00000002330	CGmito(495)	20	4	5	0	7
ENSG00000004455	CGmito(495)	395	53	37	134	82
ENSG00000004779	CGmito(495)	182	42	17	23	112
ENSG00000004799	CGmito(495)	41	11	4	5	17
ENSG00000005022	CGmito(495)	132	13	5	44	50
ENSG00000005249	CGmito(495)	69	11	4	16	8
ENSG00000005882	CGmito(495)	81	27	7	16	30
ENSG00000010256	CGmito(495)	320	70	29	56	163
ENSG00000011376	CGmito(495)	310	40	32	76	73
ENSG00000015475	CGmito(495)	43	7	10	0	12
ENSG00000023330	CGmito(495)	69	22	10	15	30
ENSG00000023572	CGmito(495)	68	16	6	12	33
ENSG00000025772	CGmito(495)	21	4	1	12	11
ENSG00000027001	CGmito(495)	5	2	0	2	4
ENSG00000033050	CGmito(495)	46	6	0	14	13
ENSG00000043514	CGmito(495)	225	11	14	47	20
ENSG00000048544	CGmito(495)	293	8	2	44	77
ENSG00000059691	CGmito(495)	95	13	4	43	39
ENSG00000061794	CGmito(495)	129	3	0	23	50
ENSG00000062485	CGmito(495)	114	37	8	15	79
ENSG00000065057	CGmito(495)	79	26	20	16	9
ENSG00000065427	CGmito(495)	1341	137	102	326	204
ENSG00000065518	CGmito(495)	180	36	10	21	109
ENSG00000065833	CGmito(495)	61	21	3	12	41
ENSG00000065911	CGmito(495)	292	68	33	62	110
ENSG00000067704	CGmito(495)	228	25	22	50	51
ENSG00000067829	CGmito(495)	290	68	18	66	136
ENSG00000067992	CGmito(495)	122	28	22	18	26
ENSG00000069535	CGmito(495)	46	13	4	1	9
ENSG00000072756	CGmito(495)	328	13	17	78	27
ENSG00000073905	CGmito(495)	76	10	10	18	16
ENSG00000074071	CGmito(495)	125	3	0	23	49
ENSG00000077713	CGmito(495)	274	7	2	43	68
ENSG00000078061	CGmito(495)	551	64	66	72	51
ENSG00000078668	CGmito(495)	90	11	7	24	9
ENSG00000078872	CGmito(495)	56	15	2	3	13
ENSG00000081181	CGmito(495)	40	18	6	7	19
ENSG00000085491	CGmito(495)	2	1	1	0	2
ENSG00000085760	CGmito(495)	237	19	11	78	45
ENSG00000086504	CGmito(495)	138	6	0	26	51
ENSG00000087470	CGmito(495)	64	8	5	20	18
ENSG00000090266	CGmito(495)	142	25	9	9	95
ENSG00000095321	CGmito(495)	25	5	2	2	10
ENSG00000096080	CGmito(495)	286	6	2	43	77
ENSG00000099624	CGmito(495)	341	61	28	56	114
ENSG00000099795	CGmito(495)	176	46	16	23	114
ENSG00000099800	CGmito(495)	26	5	3	10	23
ENSG00000099821	CGmito(495)	269	27	32	76	18
ENSG00000099968	CGmito(495)	19	6	4	1	2
ENSG00000100075	CGmito(495)	12	2	0	5	11
ENSG00000100116	CGmito(495)	10	5	1	5	7
ENSG00000100216	CGmito(495)	7	1	0	2	7
ENSG00000100288	CGmito(495)	45	15	3	4	21
ENSG00000100348	CGmito(495)	83	29	12	10	49
ENSG00000100412	CGmito(495)	95	34	7	23	59
ENSG00000100575	CGmito(495)	16	4	2	5	12
ENSG00000101290	CGmito(495)	96	9	3	21	15
ENSG00000101365	CGmito(495)	212	60	12	47	110
ENSG00000101473	CGmito(495)	75	19	8	1	9
ENSG00000102078	CGmito(495)	10	2	1	3	10
ENSG00000102738	CGmito(495)	132	6	0	25	49
ENSG00000102763	CGmito(495)	82	11	5	23	20
ENSG00000102967	CGmito(495)	131	44	13	23	74
ENSG00000103200	CGmito(495)	316	42	29	82	49
ENSG00000103423	CGmito(495)	77	7	4	26	18
ENSG00000103507	CGmito(495)	63	17	9	10	18
ENSG00000103707	CGmito(495)	27	6	2	7	15
ENSG00000104517	CGmito(495)	378	33	32	75	33
ENSG00000104823	CGmito(495)	127	45	10	32	61
ENSG00000104835	CGmito(495)	74	6	4	31	38
ENSG00000104980	CGmito(495)	26	2	1	14	16
ENSG00000105220	CGmito(495)	110	37	15	19	31
ENSG00000105364	CGmito(495)	289	7	2	46	75
ENSG00000105552	CGmito(495)	92	25	6	27	47
ENSG00000105819	CGmito(495)	30	4	2	7	8
ENSG00000106028	CGmito(495)	422	52	50	121	54
ENSG00000106049	CGmito(495)	72	23	4	4	33
ENSG00000106268	CGmito(495)	60	14	9	23	13
ENSG00000106554	CGmito(495)	3	1	0	1	1
ENSG00000108064	CGmito(495)	1457	170	306	98	16
ENSG00000108179	CGmito(495)	132	12	4	39	34
ENSG00000108528	CGmito(495)	8	1	1	3	5
ENSG00000108561	CGmito(495)	136	20	15	42	35
ENSG00000108826	CGmito(495)	282	6	2	45	69
ENSG00000109238	CGmito(495)	60	14	0	3	57
ENSG00000109390	CGmito(495)	204	48	15	25	123
ENSG00000109519	CGmito(495)	177	14	16	68	59
ENSG00000110955	CGmito(495)	333	56	28	56	120
ENSG00000111335	CGmito(495)	315	16	29	71	21
ENSG00000111775	CGmito(495)	243	59	25	39	130
ENSG00000112096	CGmito(495)	258	31	39	25	14
ENSG00000112110	CGmito(495)	286	6	3	43	77
ENSG00000112651	CGmito(495)	350	15	4	71	86
ENSG00000112695	CGmito(495)	225	49	19	41	125
ENSG00000112992	CGmito(495)	148	25	10	6	70
ENSG00000112996	CGmito(495)	291	7	2	43	78
ENSG00000113013	CGmito(495)	188	19	26	54	40
ENSG00000113048	CGmito(495)	182	12	6	40	64
ENSG00000113492	CGmito(495)	9	5	1	5	7
ENSG00000114120	CGmito(495)	9	1	0	4	8
ENSG00000114686	CGmito(495)	441	15	12	89	85
ENSG00000115364	CGmito(495)	295	7	3	45	79
ENSG00000115419	CGmito(495)	44	18	3	8	21
ENSG00000115541	CGmito(495)	218	22	30	59	53
ENSG00000115944	CGmito(495)	216	49	18	34	117
ENSG00000116459	CGmito(495)	618	95	53	125	161
ENSG00000116771	CGmito(495)	32	8	3	1	13
ENSG00000116874	CGmito(495)	72	9	1	34	34
ENSG00000116898	CGmito(495)	290	6	3	44	78
ENSG00000117009	CGmito(495)	10	2	0	3	8
ENSG00000119013	CGmito(495)	328	62	25	50	143
ENSG00000119421	CGmito(495)	105	17	6	7	78
ENSG00000119431	CGmito(495)	6	1	1	0	1
ENSG00000119723	CGmito(495)	12	5	1	3	10
ENSG00000119927	CGmito(495)	64	10	4	7	9
ENSG00000120053	CGmito(495)	91	42	7	21	48
ENSG00000120254	CGmito(495)	121	37	8	33	37
ENSG00000120329	CGmito(495)	57	11	5	4	17
ENSG00000120333	CGmito(495)	273	6	2	43	68
ENSG00000121057	CGmito(495)	347	15	21	86	25
ENSG00000121897	CGmito(495)	87	34	8	30	53
ENSG00000122140	CGmito(495)	308	11	4	55	82
ENSG00000123130	CGmito(495)	17	3	0	3	3
ENSG00000123453	CGmito(495)	35	19	3	6	20
ENSG00000123983	CGmito(495)	124	34	10	41	48
ENSG00000124172	CGmito(495)	236	41	16	33	88
ENSG00000125166	CGmito(495)	166	52	11	40	75
ENSG00000125375	CGmito(495)	82	9	6	2	25
ENSG00000125656	CGmito(495)	106	16	10	38	33
ENSG00000126267	CGmito(495)	284	59	27	58	137
ENSG00000126432	CGmito(495)	66	12	4	13	19
ENSG00000126602	CGmito(495)	285	32	49	86	58
ENSG00000126768	CGmito(495)	18	3	1	10	15
ENSG00000127184	CGmito(495)	283	57	24	52	132
ENSG00000127540	CGmito(495)	173	44	11	23	110
ENSG00000127884	CGmito(495)	131	48	10	24	75
ENSG00000127989	CGmito(495)	896	91	166	64	8
ENSG00000128309	CGmito(495)	30	16	5	5	16
ENSG00000128311	CGmito(495)	18	10	3	1	8
ENSG00000128609	CGmito(495)	154	40	13	14	99
ENSG00000128626	CGmito(495)	494	34	22	121	115
ENSG00000128654	CGmito(495)	28	6	3	7	21
ENSG00000128951	CGmito(495)	479	68	49	123	85
ENSG00000130204	CGmito(495)	74	10	3	18	29
ENSG00000130288	CGmito(495)	461	45	47	92	87
ENSG00000130312	CGmito(495)	291	7	2	45	80
ENSG00000130414	CGmito(495)	234	39	16	71	116
ENSG00000131055	CGmito(495)	8	2	1	1	6
ENSG00000131143	CGmito(495)	171	44	14	16	109
ENSG00000131174	CGmito(495)	270	61	25	53	139
ENSG00000131368	CGmito(495)	273	6	2	43	68
ENSG00000131495	CGmito(495)	54	14	5	2	45
ENSG00000131586	CGmito(495)	487	18	13	98	96
ENSG00000131730	CGmito(495)	11	3	0	1	3
ENSG00000131748	CGmito(495)	64	20	7	9	13
ENSG00000132286	CGmito(495)	25	3	1	9	22
ENSG00000132305	CGmito(495)	46	8	3	19	19
ENSG00000132313	CGmito(495)	126	2	0	24	48
ENSG00000132676	CGmito(495)	108	6	6	23	29
ENSG00000134056	CGmito(495)	273	6	2	43	68
ENSG00000134375	CGmito(495)	36	6	2	14	20
ENSG00000134809	CGmito(495)	22	3	1	8	21
ENSG00000135297	CGmito(495)	59	19	7	5	34
ENSG00000135390	CGmito(495)	139	28	9	7	56
ENSG00000135423	CGmito(495)	23	8	0	7	11
ENSG00000135900	CGmito(495)	284	10	17	69	15
ENSG00000135940	CGmito(495)	209	59	23	22	130
ENSG00000135972	CGmito(495)	281	8	2	44	71
ENSG00000136003	CGmito(495)	48	14	3	9	15
ENSG00000136521	CGmito(495)	246	55	15	28	139
ENSG00000136522	CGmito(495)	273	6	2	43	68
ENSG00000136758	CGmito(495)	289	27	23	85	53
ENSG00000136810	CGmito(495)	159	47	18	33	82
ENSG00000136877	CGmito(495)	123	28	11	48	35
ENSG00000137124	CGmito(495)	52	11	1	1	9
ENSG00000137714	CGmito(495)	21	3	1	9	9
ENSG00000138297	CGmito(495)	18	2	1	9	15
ENSG00000138495	CGmito(495)	196	44	20	21	94
ENSG00000138777	CGmito(495)	196	17	8	57	41
ENSG00000139131	CGmito(495)	82	7	2	38	38
ENSG00000139180	CGmito(495)	352	65	31	65	128
ENSG00000140009	CGmito(495)	1014	111	207	38	6
ENSG00000140740	CGmito(495)	314	58	24	44	153
ENSG00000140990	CGmito(495)	222	28	9	39	93
ENSG00000141378	CGmito(495)	28	4	5	4	5
ENSG00000141385	CGmito(495)	272	35	30	75	82
ENSG00000141682	CGmito(495)	22	6	11	2	3
ENSG00000143436	CGmito(495)	292	8	3	43	78
ENSG00000144029	CGmito(495)	273	6	2	43	68
ENSG00000144182	CGmito(495)	23	7	3	4	9
ENSG00000144559	CGmito(495)	1222	152	285	44	7
ENSG00000145982	CGmito(495)	596	30	28	140	69
ENSG00000146701	CGmito(495)	307	84	26	69	154
ENSG00000147123	CGmito(495)	66	16	3	4	56
ENSG00000147576	CGmito(495)	17	7	1	0	9
ENSG00000147586	CGmito(495)	374	13	14	88	61
ENSG00000147684	CGmito(495)	81	13	1	2	44
ENSG00000147853	CGmito(495)	44	3	0	23	5
ENSG00000148950	CGmito(495)	6	2	0	0	2
ENSG00000149124	CGmito(495)	4	2	0	0	4
ENSG00000149792	CGmito(495)	439	20	12	95	93
ENSG00000150779	CGmito(495)	21	4	2	8	19
ENSG00000151093	CGmito(495)	37	11	3	8	9
ENSG00000151366	CGmito(495)	153	33	11	9	96
ENSG00000151376	CGmito(495)	48	18	4	10	28
ENSG00000151498	CGmito(495)	338	52	47	45	41
ENSG00000151726	CGmito(495)	86	20	8	20	31
ENSG00000152234	CGmito(495)	646	101	69	122	176
ENSG00000152256	CGmito(495)	208	45	25	45	53
ENSG00000154518	CGmito(495)	477	79	45	85	152
ENSG00000154719	CGmito(495)	136	9	1	28	56
ENSG00000154723	CGmito(495)	398	67	32	65	133
ENSG00000154930	CGmito(495)	30	18	5	4	20
ENSG00000154999	CGmito(495)	324	12	5	58	86
ENSG00000155463	CGmito(495)	50	13	3	7	38
ENSG00000156411	CGmito(495)	70	5	3	10	37
ENSG00000156502	CGmito(495)	701	67	62	178	102
ENSG00000156709	CGmito(495)	196	63	30	34	82
ENSG00000156885	CGmito(495)	4	1	0	0	4
ENSG00000157312	CGmito(495)	59	8	5	13	17
ENSG00000158042	CGmito(495)	300	7	3	49	80
ENSG00000159186	CGmito(495)	481	77	40	95	148
ENSG00000159199	CGmito(495)	418	73	38	72	138
ENSG00000159399	CGmito(495)	91	31	6	12	18
ENSG00000160194	CGmito(495)	75	11	1	2	44
ENSG00000160221	CGmito(495)	8	1	0	1	6
ENSG00000160916	CGmito(495)	295	49	23	61	117
ENSG00000161267	CGmito(495)	58	25	9	9	34
ENSG00000161513	CGmito(495)	36	12	7	9	9
ENSG00000163114	CGmito(495)	119	33	9	31	48
ENSG00000163319	CGmito(495)	273	6	2	43	68
ENSG00000163626	CGmito(495)	19	3	3	1	9
ENSG00000163797	CGmito(495)	278	6	2	43	72
ENSG00000164163	CGmito(495)	468	64	55	115	113
ENSG00000164347	CGmito(495)	14	3	0	3	4
ENSG00000164405	CGmito(495)	99	17	3	18	56
ENSG00000164919	CGmito(495)	288	64	26	55	149
ENSG00000164933	CGmito(495)	7	3	1	0	1
ENSG00000165264	CGmito(495)	127	20	6	7	85
ENSG00000165629	CGmito(495)	400	66	26	79	134
ENSG00000165637	CGmito(495)	93	14	6	27	24
ENSG00000165672	CGmito(495)	269	61	23	53	129
ENSG00000165688	CGmito(495)	146	22	13	46	45
ENSG00000166136	CGmito(495)	239	51	19	28	131
ENSG00000166260	CGmito(495)	87	21	6	6	52
ENSG00000166411	CGmito(495)	202	59	18	41	98
ENSG00000166743	CGmito(495)	52	14	1	3	21
ENSG00000166816	CGmito(495)	87	14	5	7	32
ENSG00000166855	CGmito(495)	303	33	39	73	62
ENSG00000166902	CGmito(495)	290	7	3	44	79
ENSG00000167186	CGmito(495)	103	31	10	16	32
ENSG00000167283	CGmito(495)	471	69	42	84	129
ENSG00000167315	CGmito(495)	49	25	4	6	32
ENSG00000167468	CGmito(495)	236	54	11	42	83
ENSG00000167701	CGmito(495)	55	20	5	13	18
ENSG00000167774	CGmito(495)	192	42	12	26	115
ENSG00000167863	CGmito(495)	409	70	35	69	130
ENSG00000167969	CGmito(495)	18	7	2	3	9
ENSG00000168653	CGmito(495)	139	25	9	10	92
ENSG00000169020	CGmito(495)	291	48	20	41	102
ENSG00000169021	CGmito(495)	399	89	37	87	173
ENSG00000169100	CGmito(495)	81	6	3	25	36
ENSG00000169288	CGmito(495)	328	9	6	62	72
ENSG00000170095	CGmito(495)	12	4	1	2	7
ENSG00000171109	CGmito(495)	7	3	1	0	3
ENSG00000171421	CGmito(495)	277	6	2	43	68
ENSG00000171552	CGmito(495)	33	7	11	0	10
ENSG00000172115	CGmito(495)	71	16	10	11	40
ENSG00000172172	CGmito(495)	300	7	3	50	80
ENSG00000172340	CGmito(495)	147	40	15	31	63
ENSG00000173660	CGmito(495)	283	63	21	45	149
ENSG00000173726	CGmito(495)	98	13	8	28	36
ENSG00000173992	CGmito(495)	90	25	17	2	18
ENSG00000174100	CGmito(495)	272	6	2	43	67
ENSG00000174547	CGmito(495)	328	8	4	59	84
ENSG00000175581	CGmito(495)	289	7	3	43	76
ENSG00000176134	CGmito(495)	13	6	1	0	10
ENSG00000176171	CGmito(495)	14	1	3	1	3
ENSG00000176340	CGmito(495)	338	69	29	57	154
ENSG00000178741	CGmito(495)	313	64	27	73	160
ENSG00000179091	CGmito(495)	170	28	13	44	81
ENSG00000180353	CGmito(495)	1480	170	310	89	14
ENSG00000180992	CGmito(495)	273	6	2	43	68
ENSG00000181192	CGmito(495)	80	26	7	11	29
ENSG00000181867	CGmito(495)	49	16	12	7	6
ENSG00000181991	CGmito(495)	306	9	4	52	82
ENSG00000182054	CGmito(495)	96	37	7	8	67
ENSG00000182199	CGmito(495)	78	23	8	18	37
ENSG00000182810	CGmito(495)	348	18	18	100	51
ENSG00000182890	CGmito(495)	54	28	3	4	35
ENSG00000183010	CGmito(495)	774	87	106	89	58
ENSG00000183048	CGmito(495)	22	5	0	3	8
ENSG00000183093	CGmito(495)	618	30	25	151	113
ENSG00000183648	CGmito(495)	88	18	7	5	60
ENSG00000184047	CGmito(495)	75	12	14	2	16
ENSG00000184076	CGmito(495)	151	33	8	10	101
ENSG00000184254	CGmito(495)	66	15	1	2	16
ENSG00000184903	CGmito(495)	5	2	0	0	2
ENSG00000184983	CGmito(495)	153	42	13	17	103
ENSG00000185608	CGmito(495)	23	2	0	2	17
ENSG00000185633	CGmito(495)	54	10	6	20	16
ENSG00000185973	CGmito(495)	21	3	1	1	8
ENSG00000186298	CGmito(495)	218	37	16	51	42
ENSG00000187134	CGmito(495)	54	13	2	10	16
ENSG00000189043	CGmito(495)	99	16	8	6	75
ENSG00000196262	CGmito(495)	367	43	33	89	95
ENSG00000196365	CGmito(495)	223	28	17	73	71
ENSG00000196475	CGmito(495)	14	2	1	0	5
ENSG00000196683	CGmito(495)	57	2	3	10	16
ENSG00000197142	CGmito(495)	44	14	2	15	28
ENSG00000197150	CGmito(495)	108	22	15	3	19
ENSG00000197442	CGmito(495)	453	43	72	28	21
ENSG00000197448	CGmito(495)	17	3	4	0	9
ENSG00000197711	CGmito(495)	9	6	3	2	2
ENSG00000198015	CGmito(495)	298	8	4	47	78
ENSG00000050748	CGmito(495)	525	56	72	59	49
ENSG00000089127	CGmito(495)	262	15	20	59	14
ENSG00000097033	CGmito(495)	17	7	2	2	8
ENSG00000100300	CGmito(495)	13	2	0	7	13
ENSG00000103152	CGmito(495)	29	7	6	3	5
ENSG00000162877	CGmito(495)	10	5	1	2	7
ENSG00000003989	CGmito(495)	49	11	5	3	14
ENSG00000007376	CGmito(495)	277	9	16	68	16
ENSG00000013293	CGmito(495)	55	11	6	3	14
ENSG00000014641	CGmito(495)	233	70	18	34	131
ENSG00000031698	CGmito(495)	981	83	67	216	142
ENSG00000042286	CGmito(495)	12	3	2	0	9
ENSG00000051341	CGmito(495)	179	20	17	54	27
ENSG00000053371	CGmito(495)	83	24	5	9	55
ENSG00000060971	CGmito(495)	69	30	5	9	34
ENSG00000060982	CGmito(495)	95	19	12	30	34
ENSG00000063241	CGmito(495)	2	1	0	0	1
ENSG00000069345	CGmito(495)	114	12	13	37	19
ENSG00000076555	CGmito(495)	94	23	5	17	40
ENSG00000082515	CGmito(495)	287	6	2	44	77
ENSG00000083099	CGmito(495)	27	9	3	1	24
ENSG00000084090	CGmito(495)	35	3	7	3	8
ENSG00000084774	CGmito(495)	539	91	66	140	138
ENSG00000086189	CGmito(495)	275	16	16	94	34
ENSG00000088205	CGmito(495)	857	76	70	234	110
ENSG00000088451	CGmito(495)	18	9	2	2	6
ENSG00000090857	CGmito(495)	33	16	1	3	16
ENSG00000090861	CGmito(495)	953	88	70	210	142
ENSG00000100141	CGmito(495)	75	13	3	17	10
ENSG00000100209	CGmito(495)	54	4	1	15	6
ENSG00000100316	CGmito(495)	502	18	12	96	92
ENSG00000100445	CGmito(495)	25	5	3	3	10
ENSG00000100577	CGmito(495)	53	18	3	2	26
ENSG00000100867	CGmito(495)	14	2	2	0	3
ENSG00000103257	CGmito(495)	63	14	6	8	18
ENSG00000103356	CGmito(495)	68	6	4	32	36
ENSG00000104907	CGmito(495)	382	18	21	94	33
ENSG00000104969	CGmito(495)	82	12	10	20	21
ENSG00000105193	CGmito(495)	417	23	6	90	98
ENSG00000106153	CGmito(495)	30	2	0	6	16
ENSG00000107959	CGmito(495)	12	5	2	1	5
ENSG00000108010	CGmito(495)	2	1	1	1	1
ENSG00000108958	CGmito(495)	34	15	3	3	31
ENSG00000110700	CGmito(495)	408	20	7	85	92
ENSG00000110871	CGmito(495)	12	1	2	2	6
ENSG00000112474	CGmito(495)	64	22	5	10	16
ENSG00000112855	CGmito(495)	329	35	29	64	62
ENSG00000112972	CGmito(495)	93	27	9	29	30
ENSG00000113407	CGmito(495)	675	79	65	167	124
ENSG00000113504	CGmito(495)	114	26	10	4	15
ENSG00000114383	CGmito(495)	8	1	1	4	3
ENSG00000115129	CGmito(495)	57	13	8	8	10
ENSG00000115425	CGmito(495)	26	12	4	1	7
ENSG00000115484	CGmito(495)	408	46	45	120	75
ENSG00000115866	CGmito(495)	808	97	72	186	145
ENSG00000116353	CGmito(495)	76	34	11	8	26
ENSG00000116882	CGmito(495)	26	8	0	6	12
ENSG00000117450	CGmito(495)	74	14	2	27	32
ENSG00000117592	CGmito(495)	219	52	13	32	90
ENSG00000117593	CGmito(495)	51	3	1	25	29
ENSG00000119673	CGmito(495)	41	7	2	1	7
ENSG00000120438	CGmito(495)	605	62	76	160	92
ENSG00000123009	CGmito(495)	148	16	3	32	48
ENSG00000124067	CGmito(495)	103	24	11	4	16
ENSG00000124608	CGmito(495)	51	3	1	24	29
ENSG00000125445	CGmito(495)	288	6	3	43	76
ENSG00000125691	CGmito(495)	365	11	6	72	82
ENSG00000127838	CGmito(495)	26	4	2	0	6
ENSG00000129282	CGmito(495)	311	11	17	71	19
ENSG00000130348	CGmito(495)	80	6	3	34	34
ENSG00000130876	CGmito(495)	55	11	6	4	14
ENSG00000130997	CGmito(495)	38	3	1	9	4
ENSG00000131100	CGmito(495)	342	56	22	55	107
ENSG00000131473	CGmito(495)	402	74	49	91	95
ENSG00000132361	CGmito(495)	220	31	15	80	71
ENSG00000132394	CGmito(495)	23	3	0	4	4
ENSG00000132591	CGmito(495)	347	15	22	82	26
ENSG00000134440	CGmito(495)	783	99	67	171	170
ENSG00000134905	CGmito(495)	131	9	6	44	41
ENSG00000135094	CGmito(495)	92	27	4	15	34
ENSG00000135624	CGmito(495)	447	56	58	118	84
ENSG00000136371	CGmito(495)	49	9	7	19	17
ENSG00000136444	CGmito(495)	39	19	6	4	23
ENSG00000136628	CGmito(495)	452	57	39	114	102
ENSG00000137330	CGmito(495)	321	12	5	57	86
ENSG00000137513	CGmito(495)	190	23	14	64	66
ENSG00000137547	CGmito(495)	305	10	3	51	80
ENSG00000137944	CGmito(495)	302	21	19	86	28
ENSG00000138035	CGmito(495)	337	13	17	100	20
ENSG00000138396	CGmito(495)	280	7	2	45	68
ENSG00000138413	CGmito(495)	131	47	10	12	84
ENSG00000139514	CGmito(495)	53	11	5	3	14
ENSG00000140105	CGmito(495)	379	45	37	81	73
ENSG00000142676	CGmito(495)	651	32	31	132	100
ENSG00000143149	CGmito(495)	88	18	4	3	16
ENSG00000143314	CGmito(495)	289	8	3	43	77
ENSG00000143374	CGmito(495)	127	17	8	44	55
ENSG00000144908	CGmito(495)	24	9	2	2	17
ENSG00000145439	CGmito(495)	20	9	2	1	17
ENSG00000146282	CGmito(495)	64	8	3	26	34
ENSG00000146729	CGmito(495)	23	7	3	1	8
ENSG00000146731	CGmito(495)	378	45	48	98	68
ENSG00000148334	CGmito(495)	6	2	1	0	5
ENSG00000148450	CGmito(495)	9	2	0	0	5
ENSG00000148834	CGmito(495)	101	32	9	7	71
ENSG00000151806	CGmito(495)	38	10	1	12	11
ENSG00000152428	CGmito(495)	60	5	2	25	30
ENSG00000152782	CGmito(495)	17	3	2	4	2
ENSG00000153904	CGmito(495)	23	15	4	1	15
ENSG00000156990	CGmito(495)	270	9	16	68	15
ENSG00000157379	CGmito(495)	69	20	7	4	37
ENSG00000158417	CGmito(495)	257	20	11	85	33
ENSG00000159131	CGmito(495)	179	37	22	46	59
ENSG00000161016	CGmito(495)	644	34	24	139	102
ENSG00000162368	CGmito(495)	233	28	19	55	45
ENSG00000162396	CGmito(495)	60	4	1	31	33
ENSG00000162872	CGmito(495)	273	6	2	42	68
ENSG00000163468	CGmito(495)	567	63	76	154	102
ENSG00000163655	CGmito(495)	530	91	66	143	112
ENSG00000164587	CGmito(495)	408	21	6	88	90
ENSG00000164893	CGmito(495)	55	11	6	4	14
ENSG00000164896	CGmito(495)	392	40	54	39	38
ENSG00000165349	CGmito(495)	55	11	6	3	14
ENSG00000165526	CGmito(495)	277	9	16	68	16
ENSG00000165678	CGmito(495)	15	1	3	2	8
ENSG00000166123	CGmito(495)	18	8	1	5	8
ENSG00000166133	CGmito(495)	358	17	19	77	32
ENSG00000166226	CGmito(495)	416	46	56	112	66
ENSG00000166562	CGmito(495)	7	2	0	1	2
ENSG00000167720	CGmito(495)	38	16	1	6	16
ENSG00000167815	CGmito(495)	110	28	6	31	42
ENSG00000167862	CGmito(495)	319	39	18	115	92
ENSG00000167985	CGmito(495)	4	3	0	2	4
ENSG00000168028	CGmito(495)	455	30	14	98	96
ENSG00000168457	CGmito(495)	44	22	2	3	21
ENSG00000169093	CGmito(495)	39	14	6	3	16
ENSG00000169169	CGmito(495)	31	11	2	2	14
ENSG00000169710	CGmito(495)	202	71	19	24	86
ENSG00000169718	CGmito(495)	385	30	24	90	91
ENSG00000169738	CGmito(495)	132	37	10	19	65
ENSG00000171674	CGmito(495)	273	6	2	43	68
ENSG00000171861	CGmito(495)	328	12	18	73	23
ENSG00000171989	CGmito(495)	70	21	6	9	33
ENSG00000172345	CGmito(495)	41	12	5	3	4
ENSG00000173658	CGmito(495)	328	9	6	62	72
ENSG00000173863	CGmito(495)	273	6	2	43	68
ENSG00000175511	CGmito(495)	46	15	2	5	8
ENSG00000175806	CGmito(495)	39	14	4	2	21
ENSG00000176410	CGmito(495)	47	3	1	14	4
ENSG00000176715	CGmito(495)	22	9	1	6	12
ENSG00000176974	CGmito(495)	73	28	9	12	38
ENSG00000177646	CGmito(495)	3	1	0	0	3
ENSG00000179115	CGmito(495)	504	72	44	124	111
ENSG00000179360	CGmito(495)	140	28	10	6	55
ENSG00000180389	CGmito(495)	140	28	10	6	55
ENSG00000180817	CGmito(495)	269	37	22	71	55
ENSG00000181873	CGmito(495)	28	12	1	3	11
ENSG00000182021	CGmito(495)	13	6	1	0	10
ENSG00000182382	CGmito(495)	273	6	2	42	68
ENSG00000182404	CGmito(495)	81	25	9	7	55
ENSG00000184906	CGmito(495)	13	6	1	0	10
ENSG00000185414	CGmito(495)	274	6	2	44	68
ENSG00000185834	CGmito(495)	273	6	2	43	68
ENSG00000185875	CGmito(495)	45	13	1	19	19
ENSG00000185984	CGmito(495)	49	11	6	4	13
ENSG00000186381	CGmito(495)	75	11	1	2	44
ENSG00000186468	CGmito(495)	376	19	5	72	82
ENSG00000187042	CGmito(495)	280	8	3	46	70
ENSG00000187197	CGmito(495)	20	6	1	6	4
ENSG00000188226	CGmito(495)	273	6	2	43	68
ENSG00000196305	CGmito(495)	576	69	60	135	115
ENSG00000196722	CGmito(495)	273	6	2	42	68
ENSG00000197009	CGmito(495)	273	6	2	43	68
ENSG00000197017	CGmito(495)	55	11	6	4	14
ENSG00000197345	CGmito(495)	328	9	6	62	72
ENSG00000197444	CGmito(495)	74	23	7	10	29
ENSG00000197763	CGmito(495)	8	3	2	2	5
ENSG00000197883	CGmito(495)	75	11	1	2	44
ENSG00000197958	CGmito(495)	586	25	19	120	97
ENSG00000198827	CGmito(495)	273	6	2	43	68
ENSG00000000457	CGnon-mito(3551)	299	22	37	20	11
ENSG00000000938	CGnon-mito(3551)	303	39	48	18	17
ENSG00000001167	CGnon-mito(3551)	1285	135	256	71	10
ENSG00000001630	CGnon-mito(3551)	94	38	11	15	39
ENSG00000002726	CGnon-mito(3551)	27	10	3	1	5
ENSG00000003402	CGnon-mito(3551)	67	11	16	4	8
ENSG00000003756	CGnon-mito(3551)	517	26	37	116	36
ENSG00000004468	CGnon-mito(3551)	31	6	2	0	5
ENSG00000004478	CGnon-mito(3551)	150	21	16	38	30
ENSG00000004487	CGnon-mito(3551)	764	89	129	102	99
ENSG00000004534	CGnon-mito(3551)	444	16	21	94	33
ENSG00000004660	CGnon-mito(3551)	479	60	87	13	9
ENSG00000004700	CGnon-mito(3551)	289	40	46	49	41
ENSG00000004809	CGnon-mito(3551)	16	5	1	0	2
ENSG00000005007	CGnon-mito(3551)	591	36	32	155	73
ENSG00000005075	CGnon-mito(3551)	1538	133	225	183	91
ENSG00000005102	CGnon-mito(3551)	1003	130	238	28	6
ENSG00000005156	CGnon-mito(3551)	229	35	41	59	43
ENSG00000005302	CGnon-mito(3551)	1256	130	256	62	11
ENSG00000005436	CGnon-mito(3551)	1277	149	269	72	9
ENSG00000005469	CGnon-mito(3551)	18	3	1	0	6
ENSG00000005513	CGnon-mito(3551)	1081	127	236	31	8
ENSG00000005810	CGnon-mito(3551)	100	9	6	33	17
ENSG00000006062	CGnon-mito(3551)	128	10	12	4	2
ENSG00000006194	CGnon-mito(3551)	1343	168	312	81	11
ENSG00000006377	CGnon-mito(3551)	937	111	195	29	6
ENSG00000006432	CGnon-mito(3551)	262	26	38	4	5
ENSG00000006451	CGnon-mito(3551)	67	5	6	13	1
ENSG00000006468	CGnon-mito(3551)	857	95	175	24	6
ENSG00000006534	CGnon-mito(3551)	32	8	1	4	13
ENSG00000006625	CGnon-mito(3551)	25	6	2	10	7
ENSG00000006634	CGnon-mito(3551)	155	11	21	68	13
ENSG00000006717	CGnon-mito(3551)	347	7	3	65	81
ENSG00000006831	CGnon-mito(3551)	35	9	5	2	6
ENSG00000006837	CGnon-mito(3551)	103	6	4	3	1
ENSG00000007001	CGnon-mito(3551)	14	5	0	0	2
ENSG00000007047	CGnon-mito(3551)	214	22	26	13	9
ENSG00000007171	CGnon-mito(3551)	39	10	7	4	10
ENSG00000007174	CGnon-mito(3551)	67	8	6	5	2
ENSG00000007237	CGnon-mito(3551)	11	2	4	0	1
ENSG00000007264	CGnon-mito(3551)	271	27	39	20	11
ENSG00000007541	CGnon-mito(3551)	117	16	8	22	4
ENSG00000007565	CGnon-mito(3551)	394	40	80	44	11
ENSG00000007816	CGnon-mito(3551)	41	5	3	31	6
ENSG00000007866	CGnon-mito(3551)	843	98	177	19	6
ENSG00000007923	CGnon-mito(3551)	110	11	12	31	28
ENSG00000007968	CGnon-mito(3551)	1049	110	213	50	10
ENSG00000008018	CGnon-mito(3551)	431	49	30	125	87
ENSG00000008118	CGnon-mito(3551)	170	22	17	7	5
ENSG00000008128	CGnon-mito(3551)	1090	91	144	169	55
ENSG00000008197	CGnon-mito(3551)	1034	134	244	30	6
ENSG00000008382	CGnon-mito(3551)	1222	152	285	45	8
ENSG00000008441	CGnon-mito(3551)	902	101	175	30	6
ENSG00000008735	CGnon-mito(3551)	48	7	8	0	2
ENSG00000008838	CGnon-mito(3551)	1254	100	171	128	58
ENSG00000008988	CGnon-mito(3551)	350	15	3	69	84
ENSG00000009307	CGnon-mito(3551)	830	40	84	108	41
ENSG00000009335	CGnon-mito(3551)	170	18	12	51	32
ENSG00000009413	CGnon-mito(3551)	260	38	38	69	18
ENSG00000010030	CGnon-mito(3551)	786	92	155	14	6
ENSG00000010219	CGnon-mito(3551)	230	19	25	17	10
ENSG00000010244	CGnon-mito(3551)	1492	173	324	118	17
ENSG00000010327	CGnon-mito(3551)	40	7	6	1	1
ENSG00000010810	CGnon-mito(3551)	190	27	35	3	6
ENSG00000011052	CGnon-mito(3551)	591	70	60	170	121
ENSG00000011083	CGnon-mito(3551)	60	12	7	4	15
ENSG00000011177	CGnon-mito(3551)	20	3	2	0	3
ENSG00000011260	CGnon-mito(3551)	140	9	9	62	27
ENSG00000011275	CGnon-mito(3551)	504	49	31	36	67
ENSG00000011304	CGnon-mito(3551)	791	54	53	215	98
ENSG00000011485	CGnon-mito(3551)	150	14	18	20	25
ENSG00000011566	CGnon-mito(3551)	226	18	27	9	7
ENSG00000012174	CGnon-mito(3551)	2	2	0	0	1
ENSG00000012504	CGnon-mito(3551)	1120	141	254	39	9
ENSG00000012779	CGnon-mito(3551)	62	19	7	4	7
ENSG00000012817	CGnon-mito(3551)	245	8	18	13	4
ENSG00000012963	CGnon-mito(3551)	112	13	12	34	18
ENSG00000012983	CGnon-mito(3551)	411	42	58	34	24
ENSG00000013275	CGnon-mito(3551)	285	34	24	95	82
ENSG00000013375	CGnon-mito(3551)	42	12	5	13	6
ENSG00000013441	CGnon-mito(3551)	389	36	62	28	14
ENSG00000013503	CGnon-mito(3551)	97	8	6	34	7
ENSG00000013561	CGnon-mito(3551)	873	96	159	96	40
ENSG00000013573	CGnon-mito(3551)	534	73	75	78	125
ENSG00000014123	CGnon-mito(3551)	41	4	4	3	5
ENSG00000014138	CGnon-mito(3551)	116	17	16	49	15
ENSG00000014216	CGnon-mito(3551)	30	6	4	1	3
ENSG00000015153	CGnon-mito(3551)	993	69	145	60	6
ENSG00000015479	CGnon-mito(3551)	397	19	27	104	33
ENSG00000016082	CGnon-mito(3551)	967	136	250	30	6
ENSG00000017483	CGnon-mito(3551)	55	11	6	4	15
ENSG00000020426	CGnon-mito(3551)	568	58	108	119	25
ENSG00000020633	CGnon-mito(3551)	1342	144	266	92	34
ENSG00000021461	CGnon-mito(3551)	35	7	1	0	8
ENSG00000021762	CGnon-mito(3551)	16	6	1	1	5
ENSG00000023318	CGnon-mito(3551)	29	2	2	10	4
ENSG00000023608	CGnon-mito(3551)	1429	121	221	58	14
ENSG00000023734	CGnon-mito(3551)	103	12	9	29	25
ENSG00000024048	CGnon-mito(3551)	86	6	7	26	16
ENSG00000025156	CGnon-mito(3551)	1227	123	249	65	10
ENSG00000025423	CGnon-mito(3551)	17	9	2	2	5
ENSG00000025434	CGnon-mito(3551)	1182	143	268	45	9
ENSG00000026036	CGnon-mito(3551)	40	8	4	7	5
ENSG00000026297	CGnon-mito(3551)	101	5	8	14	6
ENSG00000026652	CGnon-mito(3551)	74	9	6	17	17
ENSG00000027075	CGnon-mito(3551)	151	12	11	9	3
ENSG00000027644	CGnon-mito(3551)	182	22	24	4	1
ENSG00000028116	CGnon-mito(3551)	418	46	56	44	37
ENSG00000028277	CGnon-mito(3551)	815	93	162	21	6
ENSG00000029153	CGnon-mito(3551)	1134	143	256	54	7
ENSG00000029363	CGnon-mito(3551)	1231	110	204	94	14
ENSG00000029725	CGnon-mito(3551)	4	2	2	0	1
ENSG00000030110	CGnon-mito(3551)	14	5	6	0	8
ENSG00000030304	CGnon-mito(3551)	175	24	37	6	3
ENSG00000032219	CGnon-mito(3551)	1132	108	206	37	4
ENSG00000032742	CGnon-mito(3551)	275	6	1	43	70
ENSG00000033170	CGnon-mito(3551)	102	25	9	12	3
ENSG00000033800	CGnon-mito(3551)	1097	116	201	83	23
ENSG00000034152	CGnon-mito(3551)	738	76	126	66	14
ENSG00000034713	CGnon-mito(3551)	29	4	3	3	3
ENSG00000035664	CGnon-mito(3551)	294	20	38	17	12
ENSG00000035687	CGnon-mito(3551)	203	30	20	35	55
ENSG00000035928	CGnon-mito(3551)	1030	110	172	123	45
ENSG00000036257	CGnon-mito(3551)	76	9	19	16	8
ENSG00000036530	CGnon-mito(3551)	43	10	9	3	9
ENSG00000036549	CGnon-mito(3551)	102	14	11	15	6
ENSG00000037042	CGnon-mito(3551)	83	7	6	9	3
ENSG00000037241	CGnon-mito(3551)	327	8	5	59	82
ENSG00000037965	CGnon-mito(3551)	993	127	232	29	6
ENSG00000038274	CGnon-mito(3551)	96	31	8	9	43
ENSG00000038382	CGnon-mito(3551)	404	40	62	32	20
ENSG00000039123	CGnon-mito(3551)	527	50	38	139	73
ENSG00000039650	CGnon-mito(3551)	230	35	34	41	28
ENSG00000040199	CGnon-mito(3551)	61	6	4	19	20
ENSG00000040341	CGnon-mito(3551)	153	8	6	35	10
ENSG00000041357	CGnon-mito(3551)	256	21	18	85	41
ENSG00000042429	CGnon-mito(3551)	428	43	91	43	4
ENSG00000043039	CGnon-mito(3551)	751	80	139	13	6
ENSG00000044524	CGnon-mito(3551)	115	14	14	2	1
ENSG00000047188	CGnon-mito(3551)	139	20	16	23	21
ENSG00000047249	CGnon-mito(3551)	447	71	54	52	108
ENSG00000047315	CGnon-mito(3551)	1632	141	238	195	78
ENSG00000047634	CGnon-mito(3551)	1010	131	239	28	6
ENSG00000047936	CGnon-mito(3551)	200	24	37	7	3
ENSG00000048162	CGnon-mito(3551)	45	7	4	19	17
ENSG00000048740	CGnon-mito(3551)	426	15	22	98	26
ENSG00000048991	CGnon-mito(3551)	34	2	2	4	5
ENSG00000050344	CGnon-mito(3551)	875	100	173	22	7
ENSG00000051596	CGnon-mito(3551)	348	10	16	82	19
ENSG00000051620	CGnon-mito(3551)	1	1	0	0	1
ENSG00000052802	CGnon-mito(3551)	100	37	12	14	57
ENSG00000053254	CGnon-mito(3551)	1273	154	285	65	9
ENSG00000053328	CGnon-mito(3551)	21	10	2	0	14
ENSG00000054116	CGnon-mito(3551)	10	2	0	2	4
ENSG00000054118	CGnon-mito(3551)	252	27	44	30	3
ENSG00000054148	CGnon-mito(3551)	24	6	3	2	4
ENSG00000054267	CGnon-mito(3551)	214	13	23	57	13
ENSG00000054793	CGnon-mito(3551)	11	3	0	3	2
ENSG00000055130	CGnon-mito(3551)	159	17	23	45	16
ENSG00000055332	CGnon-mito(3551)	1335	103	182	94	32
ENSG00000055609	CGnon-mito(3551)	407	55	52	39	65
ENSG00000055917	CGnon-mito(3551)	558	32	30	133	47
ENSG00000056661	CGnon-mito(3551)	975	134	250	29	5
ENSG00000056678	CGnon-mito(3551)	135	12	14	44	5
ENSG00000057252	CGnon-mito(3551)	22	5	1	1	6
ENSG00000057935	CGnon-mito(3551)	1268	158	294	48	9
ENSG00000058063	CGnon-mito(3551)	262	34	30	46	39
ENSG00000058091	CGnon-mito(3551)	368	38	51	33	29
ENSG00000058262	CGnon-mito(3551)	78	3	2	29	23
ENSG00000058272	CGnon-mito(3551)	15	3	3	1	1
ENSG00000058404	CGnon-mito(3551)	361	39	60	24	15
ENSG00000058668	CGnon-mito(3551)	86	18	14	8	7
ENSG00000058729	CGnon-mito(3551)	143	12	24	30	15
ENSG00000059588	CGnon-mito(3551)	1475	92	179	134	39
ENSG00000059758	CGnon-mito(3551)	363	34	63	19	11
ENSG00000059769	CGnon-mito(3551)	109	15	7	27	20
ENSG00000060138	CGnon-mito(3551)	1278	131	255	71	10
ENSG00000060140	CGnon-mito(3551)	482	60	88	13	9
ENSG00000060303	CGnon-mito(3551)	281	6	2	43	73
ENSG00000060688	CGnon-mito(3551)	457	27	24	125	39
ENSG00000061936	CGnon-mito(3551)	1466	110	190	159	40
ENSG00000061938	CGnon-mito(3551)	304	19	50	16	6
ENSG00000061987	CGnon-mito(3551)	201	34	15	15	65
ENSG00000062282	CGnon-mito(3551)	24	7	0	0	6
ENSG00000062524	CGnon-mito(3551)	295	32	54	14	11
ENSG00000062822	CGnon-mito(3551)	204	35	27	67	16
ENSG00000063046	CGnon-mito(3551)	479	30	23	131	62
ENSG00000063176	CGnon-mito(3551)	105	18	14	12	3
ENSG00000063177	CGnon-mito(3551)	678	39	28	140	108
ENSG00000063244	CGnon-mito(3551)	385	16	21	93	25
ENSG00000063438	CGnon-mito(3551)	101	18	21	18	19
ENSG00000063515	CGnon-mito(3551)	902	110	198	26	6
ENSG00000063601	CGnon-mito(3551)	215	17	21	14	24
ENSG00000063978	CGnon-mito(3551)	1517	176	304	140	50
ENSG00000064218	CGnon-mito(3551)	1167	143	267	44	8
ENSG00000064270	CGnon-mito(3551)	114	18	12	5	22
ENSG00000064393	CGnon-mito(3551)	563	63	106	54	14
ENSG00000064489	CGnon-mito(3551)	953	109	190	35	7
ENSG00000064607	CGnon-mito(3551)	425	15	21	98	26
ENSG00000064651	CGnon-mito(3551)	124	27	10	4	17
ENSG00000064655	CGnon-mito(3551)	705	50	72	27	6
ENSG00000064703	CGnon-mito(3551)	173	7	10	49	9
ENSG00000064961	CGnon-mito(3551)	1428	164	301	90	11
ENSG00000064995	CGnon-mito(3551)	1496	162	295	101	16
ENSG00000065150	CGnon-mito(3551)	156	12	13	47	23
ENSG00000065243	CGnon-mito(3551)	196	21	28	7	2
ENSG00000065361	CGnon-mito(3551)	168	29	33	1	3
ENSG00000065457	CGnon-mito(3551)	331	12	18	80	21
ENSG00000065526	CGnon-mito(3551)	897	75	140	109	19
ENSG00000065534	CGnon-mito(3551)	172	17	22	7	3
ENSG00000065559	CGnon-mito(3551)	420	38	60	23	17
ENSG00000065613	CGnon-mito(3551)	289	28	46	19	9
ENSG00000065675	CGnon-mito(3551)	295	33	45	11	9
ENSG00000065883	CGnon-mito(3551)	318	26	44	18	7
ENSG00000065970	CGnon-mito(3551)	1363	162	294	75	9
ENSG00000065978	CGnon-mito(3551)	1676	160	285	190	45
ENSG00000066044	CGnon-mito(3551)	333	15	18	103	42
ENSG00000066056	CGnon-mito(3551)	93	15	14	0	2
ENSG00000066084	CGnon-mito(3551)	22	9	1	6	12
ENSG00000066136	CGnon-mito(3551)	1340	141	267	70	13
ENSG00000066322	CGnon-mito(3551)	39	10	5	5	6
ENSG00000066336	CGnon-mito(3551)	1274	144	267	60	8
ENSG00000066379	CGnon-mito(3551)	1407	169	307	74	10
ENSG00000066422	CGnon-mito(3551)	801	77	167	76	11
ENSG00000066735	CGnon-mito(3551)	84	5	7	20	1
ENSG00000067057	CGnon-mito(3551)	282	57	24	84	81
ENSG00000067064	CGnon-mito(3551)	86	22	11	26	15
ENSG00000067066	CGnon-mito(3551)	842	79	164	65	7
ENSG00000067082	CGnon-mito(3551)	888	70	131	55	6
ENSG00000067141	CGnon-mito(3551)	100	10	20	1	2
ENSG00000067225	CGnon-mito(3551)	202	41	16	50	66
ENSG00000067248	CGnon-mito(3551)	228	33	24	48	35
ENSG00000067369	CGnon-mito(3551)	570	50	116	58	4
ENSG00000067560	CGnon-mito(3551)	372	48	56	38	13
ENSG00000067596	CGnon-mito(3551)	602	31	32	142	69
ENSG00000067606	CGnon-mito(3551)	210	19	32	4	6
ENSG00000067646	CGnon-mito(3551)	481	56	85	11	3
ENSG00000067715	CGnon-mito(3551)	41	10	6	7	2
ENSG00000067842	CGnon-mito(3551)	74	17	12	7	7
ENSG00000067900	CGnon-mito(3551)	481	54	71	31	23
ENSG00000067955	CGnon-mito(3551)	1474	145	260	113	22
ENSG00000068120	CGnon-mito(3551)	389	53	37	131	83
ENSG00000068323	CGnon-mito(3551)	1283	150	243	88	47
ENSG00000068784	CGnon-mito(3551)	205	9	11	43	14
ENSG00000068796	CGnon-mito(3551)	94	7	10	19	1
ENSG00000068903	CGnon-mito(3551)	206	10	30	22	6
ENSG00000069011	CGnon-mito(3551)	1097	135	243	54	7
ENSG00000069020	CGnon-mito(3551)	144	15	16	3	2
ENSG00000069399	CGnon-mito(3551)	1615	157	289	77	10
ENSG00000069667	CGnon-mito(3551)	1103	138	251	30	7
ENSG00000069849	CGnon-mito(3551)	120	13	11	9	24
ENSG00000069869	CGnon-mito(3551)	24	2	4	7	3
ENSG00000069943	CGnon-mito(3551)	161	28	11	28	4
ENSG00000069956	CGnon-mito(3551)	512	61	71	70	47
ENSG00000070444	CGnon-mito(3551)	1120	126	233	52	8
ENSG00000070490	CGnon-mito(3551)	52	5	5	4	4
ENSG00000070501	CGnon-mito(3551)	176	29	27	53	16
ENSG00000070669	CGnon-mito(3551)	85	23	5	27	46
ENSG00000070756	CGnon-mito(3551)	681	36	28	180	76
ENSG00000070759	CGnon-mito(3551)	390	39	64	21	13
ENSG00000070770	CGnon-mito(3551)	485	50	59	93	51
ENSG00000070808	CGnon-mito(3551)	182	17	25	8	4
ENSG00000070831	CGnon-mito(3551)	105	11	12	15	4
ENSG00000070886	CGnon-mito(3551)	287	42	66	4	3
ENSG00000070915	CGnon-mito(3551)	93	22	7	3	16
ENSG00000070961	CGnon-mito(3551)	121	21	13	17	12
ENSG00000071054	CGnon-mito(3551)	312	30	44	17	12
ENSG00000071082	CGnon-mito(3551)	350	11	5	65	83
ENSG00000071242	CGnon-mito(3551)	234	27	32	6	5
ENSG00000071539	CGnon-mito(3551)	726	83	135	131	51
ENSG00000071553	CGnon-mito(3551)	367	52	41	37	96
ENSG00000071564	CGnon-mito(3551)	1437	168	306	93	15
ENSG00000071626	CGnon-mito(3551)	101	3	4	23	7
ENSG00000071655	CGnon-mito(3551)	836	74	147	73	12
ENSG00000071794	CGnon-mito(3551)	930	92	159	133	49
ENSG00000071894	CGnon-mito(3551)	394	15	20	99	23
ENSG00000071909	CGnon-mito(3551)	237	26	32	16	11
ENSG00000072042	CGnon-mito(3551)	21	9	0	0	6
ENSG00000072062	CGnon-mito(3551)	230	20	30	12	12
ENSG00000072133	CGnon-mito(3551)	163	14	16	5	3
ENSG00000072195	CGnon-mito(3551)	475	59	87	13	9
ENSG00000072274	CGnon-mito(3551)	99	19	18	23	17
ENSG00000072310	CGnon-mito(3551)	1183	135	249	66	9
ENSG00000072319	CGnon-mito(3551)	10	2	1	3	3
ENSG00000072364	CGnon-mito(3551)	870	98	162	19	5
ENSG00000072401	CGnon-mito(3551)	256	20	18	54	18
ENSG00000072518	CGnon-mito(3551)	291	29	47	11	8
ENSG00000072682	CGnon-mito(3551)	24	4	3	5	7
ENSG00000072736	CGnon-mito(3551)	1318	146	285	68	11
ENSG00000072786	CGnon-mito(3551)	463	46	59	52	41
ENSG00000072803	CGnon-mito(3551)	116	13	15	34	18
ENSG00000073050	CGnon-mito(3551)	45	11	11	8	4
ENSG00000073111	CGnon-mito(3551)	1244	127	199	171	79
ENSG00000073331	CGnon-mito(3551)	94	7	5	2	1
ENSG00000073417	CGnon-mito(3551)	90	13	12	8	10
ENSG00000073584	CGnon-mito(3551)	780	74	136	93	33
ENSG00000073614	CGnon-mito(3551)	1165	120	227	51	8
ENSG00000073737	CGnon-mito(3551)	32	13	4	6	7
ENSG00000073756	CGnon-mito(3551)	57	11	5	2	8
ENSG00000073803	CGnon-mito(3551)	204	18	20	3	6
ENSG00000073910	CGnon-mito(3551)	10	1	0	2	3
ENSG00000073921	CGnon-mito(3551)	16	2	2	1	1
ENSG00000073969	CGnon-mito(3551)	130	20	15	34	40
ENSG00000074054	CGnon-mito(3551)	99	17	11	12	6
ENSG00000074219	CGnon-mito(3551)	1223	152	285	45	8
ENSG00000074266	CGnon-mito(3551)	114	8	16	17	5
ENSG00000074276	CGnon-mito(3551)	11	2	1	0	2
ENSG00000074319	CGnon-mito(3551)	119	18	26	13	4
ENSG00000074370	CGnon-mito(3551)	182	26	20	24	31
ENSG00000074590	CGnon-mito(3551)	218	21	31	11	6
ENSG00000074706	CGnon-mito(3551)	61	20	8	2	23
ENSG00000074771	CGnon-mito(3551)	2	1	0	0	1
ENSG00000074800	CGnon-mito(3551)	1184	145	190	143	109
ENSG00000074842	CGnon-mito(3551)	70	6	4	21	5
ENSG00000074935	CGnon-mito(3551)	65	7	8	6	3
ENSG00000074966	CGnon-mito(3551)	77	6	11	0	1
ENSG00000075142	CGnon-mito(3551)	42	15	12	5	2
ENSG00000075151	CGnon-mito(3551)	370	23	21	111	43
ENSG00000075240	CGnon-mito(3551)	13	5	2	2	3
ENSG00000075292	CGnon-mito(3551)	578	28	38	132	47
ENSG00000075407	CGnon-mito(3551)	1022	141	261	35	6
ENSG00000075413	CGnon-mito(3551)	447	48	59	48	36
ENSG00000075568	CGnon-mito(3551)	493	78	59	58	108
ENSG00000075673	CGnon-mito(3551)	89	13	10	4	26
ENSG00000075705	CGnon-mito(3551)	1222	152	285	45	8
ENSG00000075711	CGnon-mito(3551)	55	7	9	11	5
ENSG00000075826	CGnon-mito(3551)	3	1	0	1	1
ENSG00000075856	CGnon-mito(3551)	355	21	25	95	28
ENSG00000075886	CGnon-mito(3551)	132	13	14	36	9
ENSG00000075914	CGnon-mito(3551)	604	37	34	160	85
ENSG00000075945	CGnon-mito(3551)	15	4	7	2	1
ENSG00000076053	CGnon-mito(3551)	390	13	19	88	28
ENSG00000076067	CGnon-mito(3551)	393	15	20	94	29
ENSG00000076258	CGnon-mito(3551)	54	11	1	3	10
ENSG00000076685	CGnon-mito(3551)	100	19	7	9	9
ENSG00000077092	CGnon-mito(3551)	1112	139	253	34	7
ENSG00000077097	CGnon-mito(3551)	253	35	30	53	43
ENSG00000077150	CGnon-mito(3551)	1335	160	294	70	10
ENSG00000077232	CGnon-mito(3551)	47	3	1	14	5
ENSG00000077312	CGnon-mito(3551)	798	49	54	222	91
ENSG00000077348	CGnon-mito(3551)	425	20	21	114	32
ENSG00000077380	CGnon-mito(3551)	76	8	10	9	3
ENSG00000077514	CGnon-mito(3551)	361	64	51	98	38
ENSG00000077721	CGnon-mito(3551)	398	38	34	84	44
ENSG00000078124	CGnon-mito(3551)	293	10	5	43	70
ENSG00000078140	CGnon-mito(3551)	219	22	21	41	34
ENSG00000078142	CGnon-mito(3551)	86	14	16	25	7
ENSG00000078269	CGnon-mito(3551)	85	8	13	20	7
ENSG00000078319	CGnon-mito(3551)	254	38	37	58	27
ENSG00000078328	CGnon-mito(3551)	309	12	21	74	17
ENSG00000078399	CGnon-mito(3551)	1050	134	250	31	7
ENSG00000078403	CGnon-mito(3551)	1302	154	275	58	7
ENSG00000078699	CGnon-mito(3551)	1342	160	288	65	10
ENSG00000078747	CGnon-mito(3551)	132	8	9	29	2
ENSG00000078814	CGnon-mito(3551)	11	3	1	2	3
ENSG00000078900	CGnon-mito(3551)	1022	120	231	29	5
ENSG00000078967	CGnon-mito(3551)	215	13	9	19	4
ENSG00000079102	CGnon-mito(3551)	1286	157	281	61	9
ENSG00000079134	CGnon-mito(3551)	541	30	34	132	34
ENSG00000079246	CGnon-mito(3551)	666	85	88	165	105
ENSG00000079263	CGnon-mito(3551)	1378	165	297	71	9
ENSG00000079277	CGnon-mito(3551)	540	68	94	33	18
ENSG00000079335	CGnon-mito(3551)	107	10	7	6	7
ENSG00000079337	CGnon-mito(3551)	67	9	6	11	2
ENSG00000079393	CGnon-mito(3551)	98	11	8	4	1
ENSG00000079435	CGnon-mito(3551)	20	4	3	1	7
ENSG00000079459	CGnon-mito(3551)	255	81	27	35	107
ENSG00000079616	CGnon-mito(3551)	122	11	11	34	6
ENSG00000079739	CGnon-mito(3551)	181	48	17	43	52
ENSG00000079785	CGnon-mito(3551)	1056	101	65	287	183
ENSG00000079931	CGnon-mito(3551)	33	11	5	3	4
ENSG00000079999	CGnon-mito(3551)	666	65	126	75	13
ENSG00000080166	CGnon-mito(3551)	49	21	7	3	5
ENSG00000080224	CGnon-mito(3551)	278	36	61	4	3
ENSG00000080503	CGnon-mito(3551)	1255	116	213	123	41
ENSG00000080511	CGnon-mito(3551)	68	29	6	13	26
ENSG00000080603	CGnon-mito(3551)	1159	114	202	97	34
ENSG00000080608	CGnon-mito(3551)	496	23	31	159	33
ENSG00000080802	CGnon-mito(3551)	1117	116	183	122	37
ENSG00000080823	CGnon-mito(3551)	149	13	11	4	4
ENSG00000080824	CGnon-mito(3551)	412	43	61	96	66
ENSG00000080839	CGnon-mito(3551)	1664	161	305	85	9
ENSG00000081059	CGnon-mito(3551)	990	116	212	36	7
ENSG00000081189	CGnon-mito(3551)	927	88	165	43	7
ENSG00000081307	CGnon-mito(3551)	33	13	2	3	14
ENSG00000081320	CGnon-mito(3551)	439	51	76	31	23
ENSG00000081377	CGnon-mito(3551)	131	10	7	5	9
ENSG00000081665	CGnon-mito(3551)	1025	141	263	32	6
ENSG00000081721	CGnon-mito(3551)	96	9	6	3	1
ENSG00000081760	CGnon-mito(3551)	64	16	2	27	34
ENSG00000082068	CGnon-mito(3551)	3	1	0	0	1
ENSG00000082153	CGnon-mito(3551)	231	18	16	70	32
ENSG00000082175	CGnon-mito(3551)	1195	142	276	33	8
ENSG00000082641	CGnon-mito(3551)	1126	113	217	61	10
ENSG00000082701	CGnon-mito(3551)	380	44	52	25	25
ENSG00000082898	CGnon-mito(3551)	191	12	14	54	14
ENSG00000082996	CGnon-mito(3551)	86	9	8	29	21
ENSG00000083168	CGnon-mito(3551)	825	91	158	103	36
ENSG00000083290	CGnon-mito(3551)	152	14	15	5	2
ENSG00000083520	CGnon-mito(3551)	316	10	18	84	19
ENSG00000083635	CGnon-mito(3551)	302	10	19	69	21
ENSG00000083807	CGnon-mito(3551)	34	13	2	7	21
ENSG00000083838	CGnon-mito(3551)	998	138	258	30	5
ENSG00000083845	CGnon-mito(3551)	506	20	10	112	95
ENSG00000083896	CGnon-mito(3551)	429	17	19	104	24
ENSG00000084072	CGnon-mito(3551)	474	31	27	128	57
ENSG00000084093	CGnon-mito(3551)	383	36	52	9	4
ENSG00000084112	CGnon-mito(3551)	49	5	6	3	1
ENSG00000084463	CGnon-mito(3551)	30	7	8	2	4
ENSG00000084623	CGnon-mito(3551)	302	22	14	104	56
ENSG00000084676	CGnon-mito(3551)	658	75	141	58	10
ENSG00000084731	CGnon-mito(3551)	94	8	9	26	4
ENSG00000085231	CGnon-mito(3551)	1398	120	207	174	67
ENSG00000085274	CGnon-mito(3551)	1260	153	282	67	8
ENSG00000085511	CGnon-mito(3551)	572	57	69	76	59
ENSG00000085644	CGnon-mito(3551)	1002	139	255	30	6
ENSG00000085662	CGnon-mito(3551)	48	21	3	5	22
ENSG00000085840	CGnon-mito(3551)	210	25	33	79	28
ENSG00000085871	CGnon-mito(3551)	71	24	6	8	14
ENSG00000085872	CGnon-mito(3551)	312	12	18	71	20
ENSG00000085999	CGnon-mito(3551)	159	26	40	38	24
ENSG00000086015	CGnon-mito(3551)	277	27	44	12	9
ENSG00000086061	CGnon-mito(3551)	79	9	7	20	14
ENSG00000086102	CGnon-mito(3551)	1570	169	303	170	34
ENSG00000086232	CGnon-mito(3551)	423	46	56	44	33
ENSG00000086475	CGnon-mito(3551)	32	5	4	14	15
ENSG00000086598	CGnon-mito(3551)	93	8	4	26	5
ENSG00000086696	CGnon-mito(3551)	32	10	0	4	6
ENSG00000086991	CGnon-mito(3551)	2	1	0	0	1
ENSG00000087008	CGnon-mito(3551)	47	23	3	2	28
ENSG00000087095	CGnon-mito(3551)	951	69	105	48	11
ENSG00000087111	CGnon-mito(3551)	105	10	5	22	8
ENSG00000087191	CGnon-mito(3551)	97	12	15	35	24
ENSG00000087206	CGnon-mito(3551)	1862	193	351	95	15
ENSG00000087250	CGnon-mito(3551)	43	13	4	2	13
ENSG00000087263	CGnon-mito(3551)	35	7	3	12	11
ENSG00000087269	CGnon-mito(3551)	195	9	3	78	11
ENSG00000087365	CGnon-mito(3551)	290	9	16	70	5
ENSG00000087510	CGnon-mito(3551)	914	109	200	24	5
ENSG00000087586	CGnon-mito(3551)	580	66	77	87	54
ENSG00000088247	CGnon-mito(3551)	1660	170	303	155	33
ENSG00000088298	CGnon-mito(3551)	114	28	9	11	3
ENSG00000088727	CGnon-mito(3551)	84	5	7	20	1
ENSG00000088832	CGnon-mito(3551)	151	17	14	20	22
ENSG00000088930	CGnon-mito(3551)	370	12	17	87	18
ENSG00000089009	CGnon-mito(3551)	1565	109	172	226	115
ENSG00000089022	CGnon-mito(3551)	275	19	38	16	10
ENSG00000089053	CGnon-mito(3551)	491	54	43	127	70
ENSG00000089057	CGnon-mito(3551)	57	13	6	1	7
ENSG00000089116	CGnon-mito(3551)	914	122	218	28	6
ENSG00000089154	CGnon-mito(3551)	82	5	7	36	14
ENSG00000089157	CGnon-mito(3551)	636	30	21	146	102
ENSG00000089220	CGnon-mito(3551)	174	24	22	63	49
ENSG00000089248	CGnon-mito(3551)	151	15	11	48	21
ENSG00000089250	CGnon-mito(3551)	26	5	2	1	3
ENSG00000089280	CGnon-mito(3551)	354	13	25	98	20
ENSG00000089472	CGnon-mito(3551)	43	14	11	1	5
ENSG00000089597	CGnon-mito(3551)	61	13	4	9	10
ENSG00000089682	CGnon-mito(3551)	178	6	9	44	3
ENSG00000089685	CGnon-mito(3551)	47	9	12	5	4
ENSG00000089737	CGnon-mito(3551)	273	16	16	77	35
ENSG00000089775	CGnon-mito(3551)	1227	160	300	70	9
ENSG00000089876	CGnon-mito(3551)	95	13	6	21	15
ENSG00000089902	CGnon-mito(3551)	893	79	156	75	8
ENSG00000090006	CGnon-mito(3551)	159	28	45	8	5
ENSG00000090013	CGnon-mito(3551)	70	24	8	7	50
ENSG00000090020	CGnon-mito(3551)	105	7	8	3	28
ENSG00000090060	CGnon-mito(3551)	554	26	29	145	40
ENSG00000090097	CGnon-mito(3551)	184	10	17	38	3
ENSG00000090263	CGnon-mito(3551)	293	6	3	45	82
ENSG00000090273	CGnon-mito(3551)	78	11	13	32	15
ENSG00000090376	CGnon-mito(3551)	141	11	10	3	3
ENSG00000090447	CGnon-mito(3551)	1133	126	235	56	8
ENSG00000090520	CGnon-mito(3551)	49	3	1	14	5
ENSG00000090621	CGnon-mito(3551)	725	47	39	189	79
ENSG00000090661	CGnon-mito(3551)	1032	133	244	30	6
ENSG00000090889	CGnon-mito(3551)	87	8	7	21	2
ENSG00000091127	CGnon-mito(3551)	74	5	2	22	11
ENSG00000091157	CGnon-mito(3551)	29	4	2	4	7
ENSG00000091164	CGnon-mito(3551)	379	75	37	86	130
ENSG00000091428	CGnon-mito(3551)	80	10	7	13	4
ENSG00000091436	CGnon-mito(3551)	265	26	42	13	7
ENSG00000091592	CGnon-mito(3551)	29	6	4	1	5
ENSG00000091622	CGnon-mito(3551)	39	9	4	6	5
ENSG00000091651	CGnon-mito(3551)	68	10	10	32	6
ENSG00000091656	CGnon-mito(3551)	1043	143	264	39	5
ENSG00000091831	CGnon-mito(3551)	1031	123	228	32	8
ENSG00000092068	CGnon-mito(3551)	53	11	6	4	15
ENSG00000092098	CGnon-mito(3551)	1093	133	252	70	24
ENSG00000092108	CGnon-mito(3551)	35	2	9	16	1
ENSG00000092199	CGnon-mito(3551)	752	47	44	200	81
ENSG00000092201	CGnon-mito(3551)	691	54	109	59	16
ENSG00000092203	CGnon-mito(3551)	787	71	148	66	7
ENSG00000092208	CGnon-mito(3551)	493	17	23	115	35
ENSG00000092377	CGnon-mito(3551)	1698	177	322	78	12
ENSG00000092439	CGnon-mito(3551)	464	55	72	16	10
ENSG00000092445	CGnon-mito(3551)	80	8	10	0	2
ENSG00000092607	CGnon-mito(3551)	1222	152	284	45	8
ENSG00000092964	CGnon-mito(3551)	8	1	1	0	2
ENSG00000093217	CGnon-mito(3551)	11	6	3	1	1
ENSG00000094631	CGnon-mito(3551)	650	51	106	67	5
ENSG00000094804	CGnon-mito(3551)	276	32	47	98	28
ENSG00000094880	CGnon-mito(3551)	351	31	35	83	31
ENSG00000095015	CGnon-mito(3551)	137	8	19	8	4
ENSG00000095059	CGnon-mito(3551)	51	5	5	20	10
ENSG00000095066	CGnon-mito(3551)	24	5	2	3	1
ENSG00000095139	CGnon-mito(3551)	91	4	2	25	9
ENSG00000095319	CGnon-mito(3551)	68	7	7	16	12
ENSG00000095564	CGnon-mito(3551)	755	93	143	126	56
ENSG00000095794	CGnon-mito(3551)	1449	170	308	81	12
ENSG00000096060	CGnon-mito(3551)	43	2	2	5	5
ENSG00000096063	CGnon-mito(3551)	726	57	68	132	62
ENSG00000096150	CGnon-mito(3551)	487	21	10	101	92
ENSG00000096171	CGnon-mito(3551)	266	31	27	68	69
ENSG00000096384	CGnon-mito(3551)	358	47	48	99	68
ENSG00000096433	CGnon-mito(3551)	75	18	15	4	4
ENSG00000096474	CGnon-mito(3551)	105	20	17	30	16
ENSG00000096717	CGnon-mito(3551)	607	28	77	44	8
ENSG00000096746	CGnon-mito(3551)	506	23	28	124	41
ENSG00000097046	CGnon-mito(3551)	580	64	80	109	51
ENSG00000099194	CGnon-mito(3551)	48	18	6	12	22
ENSG00000099251	CGnon-mito(3551)	14	4	1	6	8
ENSG00000099256	CGnon-mito(3551)	7	3	3	0	1
ENSG00000099308	CGnon-mito(3551)	319	25	45	21	15
ENSG00000099326	CGnon-mito(3551)	1135	155	279	60	8
ENSG00000099341	CGnon-mito(3551)	193	20	16	69	53
ENSG00000099622	CGnon-mito(3551)	41	4	2	2	7
ENSG00000099725	CGnon-mito(3551)	305	23	50	17	8
ENSG00000099783	CGnon-mito(3551)	675	43	53	193	74
ENSG00000099797	CGnon-mito(3551)	31	6	4	12	11
ENSG00000099804	CGnon-mito(3551)	270	25	40	71	24
ENSG00000099817	CGnon-mito(3551)	1401	118	200	163	61
ENSG00000099860	CGnon-mito(3551)	55	10	5	0	3
ENSG00000099875	CGnon-mito(3551)	429	47	68	40	22
ENSG00000099899	CGnon-mito(3551)	225	9	11	67	14
ENSG00000099901	CGnon-mito(3551)	88	8	9	28	13
ENSG00000099917	CGnon-mito(3551)	1861	193	350	95	15
ENSG00000099942	CGnon-mito(3551)	304	36	66	13	7
ENSG00000099977	CGnon-mito(3551)	116	33	5	32	63
ENSG00000099995	CGnon-mito(3551)	588	26	32	139	40
ENSG00000099998	CGnon-mito(3551)	57	19	4	4	10
ENSG00000100028	CGnon-mito(3551)	632	38	35	170	71
ENSG00000100029	CGnon-mito(3551)	106	11	9	53	16
ENSG00000100030	CGnon-mito(3551)	536	69	82	56	32
ENSG00000100077	CGnon-mito(3551)	249	24	41	15	8
ENSG00000100084	CGnon-mito(3551)	1389	152	276	101	22
ENSG00000100105	CGnon-mito(3551)	1104	122	219	81	9
ENSG00000100138	CGnon-mito(3551)	759	30	25	157	112
ENSG00000100142	CGnon-mito(3551)	1563	155	230	168	80
ENSG00000100181	CGnon-mito(3551)	420	43	60	59	44
ENSG00000100201	CGnon-mito(3551)	551	30	32	119	62
ENSG00000100207	CGnon-mito(3551)	1010	87	165	70	9
ENSG00000100219	CGnon-mito(3551)	1204	145	262	61	8
ENSG00000100225	CGnon-mito(3551)	300	23	25	65	26
ENSG00000100241	CGnon-mito(3551)	55	7	2	3	1
ENSG00000100242	CGnon-mito(3551)	46	8	5	8	2
ENSG00000100246	CGnon-mito(3551)	43	7	3	7	2
ENSG00000100281	CGnon-mito(3551)	925	75	145	78	10
ENSG00000100290	CGnon-mito(3551)	20	5	3	0	9
ENSG00000100297	CGnon-mito(3551)	1244	125	195	168	76
ENSG00000100304	CGnon-mito(3551)	47	9	3	28	21
ENSG00000100325	CGnon-mito(3551)	1861	193	351	95	15
ENSG00000100335	CGnon-mito(3551)	43	6	3	14	9
ENSG00000100342	CGnon-mito(3551)	39	12	4	5	4
ENSG00000100344	CGnon-mito(3551)	80	23	6	4	28
ENSG00000100350	CGnon-mito(3551)	104	30	12	6	84
ENSG00000100353	CGnon-mito(3551)	394	27	25	113	52
ENSG00000100354	CGnon-mito(3551)	14	2	2	1	1
ENSG00000100365	CGnon-mito(3551)	12	3	2	1	3
ENSG00000100380	CGnon-mito(3551)	151	13	11	39	32
ENSG00000100387	CGnon-mito(3551)	118	8	18	39	27
ENSG00000100393	CGnon-mito(3551)	1052	124	232	55	8
ENSG00000100410	CGnon-mito(3551)	1446	157	290	96	11
ENSG00000100417	CGnon-mito(3551)	71	16	2	18	28
ENSG00000100422	CGnon-mito(3551)	198	22	31	5	6
ENSG00000100429	CGnon-mito(3551)	532	61	100	16	3
ENSG00000100441	CGnon-mito(3551)	14	4	2	6	4
ENSG00000100453	CGnon-mito(3551)	12	3	2	0	3
ENSG00000100461	CGnon-mito(3551)	397	11	20	90	25
ENSG00000100479	CGnon-mito(3551)	358	54	49	102	35
ENSG00000100490	CGnon-mito(3551)	477	59	87	14	9
ENSG00000100519	CGnon-mito(3551)	268	26	19	95	46
ENSG00000100523	CGnon-mito(3551)	4	2	0	0	1
ENSG00000100528	CGnon-mito(3551)	26	1	3	4	2
ENSG00000100554	CGnon-mito(3551)	298	48	25	44	98
ENSG00000100564	CGnon-mito(3551)	94	13	7	21	3
ENSG00000100567	CGnon-mito(3551)	349	35	24	104	70
ENSG00000100591	CGnon-mito(3551)	72	8	9	19	20
ENSG00000100603	CGnon-mito(3551)	856	72	153	107	11
ENSG00000100612	CGnon-mito(3551)	13	2	2	0	4
ENSG00000100625	CGnon-mito(3551)	1170	145	267	44	8
ENSG00000100632	CGnon-mito(3551)	148	13	13	42	18
ENSG00000100644	CGnon-mito(3551)	1386	154	292	77	11
ENSG00000100650	CGnon-mito(3551)	534	23	29	134	44
ENSG00000100664	CGnon-mito(3551)	286	24	17	84	38
ENSG00000100697	CGnon-mito(3551)	586	30	34	122	68
ENSG00000100749	CGnon-mito(3551)	503	52	59	81	59
ENSG00000100764	CGnon-mito(3551)	202	24	18	81	41
ENSG00000100784	CGnon-mito(3551)	1003	104	172	92	40
ENSG00000100796	CGnon-mito(3551)	226	34	13	25	64
ENSG00000100804	CGnon-mito(3551)	118	8	12	40	17
ENSG00000100811	CGnon-mito(3551)	1272	143	275	80	13
ENSG00000100813	CGnon-mito(3551)	51	6	7	8	7
ENSG00000100814	CGnon-mito(3551)	307	20	19	37	18
ENSG00000100823	CGnon-mito(3551)	1238	141	166	154	165
ENSG00000100829	CGnon-mito(3551)	1434	170	315	74	9
ENSG00000100883	CGnon-mito(3551)	208	15	8	51	23
ENSG00000100888	CGnon-mito(3551)	417	35	65	51	9
ENSG00000100902	CGnon-mito(3551)	492	36	31	132	80
ENSG00000100911	CGnon-mito(3551)	55	1	3	21	2
ENSG00000100938	CGnon-mito(3551)	123	29	9	6	71
ENSG00000100949	CGnon-mito(3551)	65	12	9	28	8
ENSG00000100968	CGnon-mito(3551)	841	94	168	22	7
ENSG00000100991	CGnon-mito(3551)	144	16	20	32	18
ENSG00000100994	CGnon-mito(3551)	90	22	4	19	24
ENSG00000101003	CGnon-mito(3551)	104	20	16	38	14
ENSG00000101049	CGnon-mito(3551)	176	12	13	4	5
ENSG00000101057	CGnon-mito(3551)	1196	129	249	79	15
ENSG00000101079	CGnon-mito(3551)	9	1	2	0	2
ENSG00000101084	CGnon-mito(3551)	25	2	0	5	5
ENSG00000101096	CGnon-mito(3551)	1223	152	285	45	8
ENSG00000101109	CGnon-mito(3551)	438	44	68	27	24
ENSG00000101126	CGnon-mito(3551)	1470	176	321	106	18
ENSG00000101138	CGnon-mito(3551)	484	19	25	116	33
ENSG00000101146	CGnon-mito(3551)	180	9	6	41	10
ENSG00000101152	CGnon-mito(3551)	47	3	1	13	5
ENSG00000101158	CGnon-mito(3551)	1795	170	318	102	13
ENSG00000101161	CGnon-mito(3551)	471	18	22	113	33
ENSG00000101162	CGnon-mito(3551)	38	5	2	0	1
ENSG00000101182	CGnon-mito(3551)	171	17	11	50	32
ENSG00000101189	CGnon-mito(3551)	1548	88	190	99	11
ENSG00000101190	CGnon-mito(3551)	1204	128	246	58	9
ENSG00000101197	CGnon-mito(3551)	34	4	5	2	5
ENSG00000101210	CGnon-mito(3551)	30	3	0	6	5
ENSG00000101213	CGnon-mito(3551)	251	19	44	11	6
ENSG00000101216	CGnon-mito(3551)	924	97	161	29	6
ENSG00000101224	CGnon-mito(3551)	185	12	25	20	13
ENSG00000101255	CGnon-mito(3551)	590	62	106	57	19
ENSG00000101266	CGnon-mito(3551)	521	56	67	81	52
ENSG00000101323	CGnon-mito(3551)	27	6	0	6	12
ENSG00000101336	CGnon-mito(3551)	175	18	29	2	5
ENSG00000101343	CGnon-mito(3551)	403	15	17	102	23
ENSG00000101347	CGnon-mito(3551)	7	1	1	1	1
ENSG00000101349	CGnon-mito(3551)	133	12	11	6	3
ENSG00000101350	CGnon-mito(3551)	95	9	9	25	5
ENSG00000101361	CGnon-mito(3551)	451	21	27	133	31
ENSG00000101412	CGnon-mito(3551)	1417	156	301	97	14
ENSG00000101438	CGnon-mito(3551)	54	11	5	4	15
ENSG00000101447	CGnon-mito(3551)	51	3	1	25	30
ENSG00000101452	CGnon-mito(3551)	146	17	10	35	28
ENSG00000101464	CGnon-mito(3551)	103	10	4	22	8
ENSG00000101489	CGnon-mito(3551)	309	9	16	77	18
ENSG00000101544	CGnon-mito(3551)	1307	163	305	81	8
ENSG00000101546	CGnon-mito(3551)	337	10	15	99	20
ENSG00000101557	CGnon-mito(3551)	251	25	25	75	13
ENSG00000101558	CGnon-mito(3551)	118	11	17	24	10
ENSG00000101654	CGnon-mito(3551)	529	27	29	134	45
ENSG00000101751	CGnon-mito(3551)	67	10	7	20	7
ENSG00000101773	CGnon-mito(3551)	1620	155	296	89	16
ENSG00000101782	CGnon-mito(3551)	403	40	54	42	35
ENSG00000101811	CGnon-mito(3551)	493	22	25	127	40
ENSG00000101825	CGnon-mito(3551)	118	14	22	1	2
ENSG00000101849	CGnon-mito(3551)	1648	144	296	87	11
ENSG00000101868	CGnon-mito(3551)	356	47	44	94	47
ENSG00000101883	CGnon-mito(3551)	1164	143	266	43	8
ENSG00000101888	CGnon-mito(3551)	204	8	11	58	7
ENSG00000101890	CGnon-mito(3551)	189	28	28	22	2
ENSG00000101892	CGnon-mito(3551)	108	16	12	2	24
ENSG00000101898	CGnon-mito(3551)	110	4	5	23	12
ENSG00000101911	CGnon-mito(3551)	205	32	22	65	49
ENSG00000102003	CGnon-mito(3551)	11	1	3	0	3
ENSG00000102010	CGnon-mito(3551)	110	13	18	0	3
ENSG00000102030	CGnon-mito(3551)	72	18	5	14	27
ENSG00000102034	CGnon-mito(3551)	1288	146	277	67	9
ENSG00000102096	CGnon-mito(3551)	350	33	45	32	15
ENSG00000102098	CGnon-mito(3551)	1178	147	260	52	7
ENSG00000102144	CGnon-mito(3551)	537	85	68	115	128
ENSG00000102172	CGnon-mito(3551)	55	15	5	10	26
ENSG00000102225	CGnon-mito(3551)	287	23	45	14	9
ENSG00000102317	CGnon-mito(3551)	542	22	28	129	48
ENSG00000102391	CGnon-mito(3551)	351	12	4	63	87
ENSG00000102554	CGnon-mito(3551)	406	35	65	9	2
ENSG00000102572	CGnon-mito(3551)	521	55	73	66	52
ENSG00000102580	CGnon-mito(3551)	75	7	4	16	6
ENSG00000102606	CGnon-mito(3551)	41	9	4	5	3
ENSG00000102699	CGnon-mito(3551)	225	37	50	24	12
ENSG00000102755	CGnon-mito(3551)	210	26	43	10	8
ENSG00000102804	CGnon-mito(3551)	908	100	194	32	7
ENSG00000102858	CGnon-mito(3551)	122	8	9	36	21
ENSG00000102871	CGnon-mito(3551)	38	7	8	1	1
ENSG00000102882	CGnon-mito(3551)	387	39	64	30	19
ENSG00000102908	CGnon-mito(3551)	760	80	140	14	6
ENSG00000102974	CGnon-mito(3551)	1427	153	289	105	13
ENSG00000102978	CGnon-mito(3551)	1303	108	180	137	40
ENSG00000103024	CGnon-mito(3551)	312	35	22	76	66
ENSG00000103035	CGnon-mito(3551)	185	13	14	69	39
ENSG00000103042	CGnon-mito(3551)	53	11	5	4	14
ENSG00000103064	CGnon-mito(3551)	56	12	7	3	14
ENSG00000103066	CGnon-mito(3551)	52	9	2	5	21
ENSG00000103080	CGnon-mito(3551)	38	10	1	5	12
ENSG00000103199	CGnon-mito(3551)	1076	146	270	48	6
ENSG00000103222	CGnon-mito(3551)	231	14	25	31	33
ENSG00000103241	CGnon-mito(3551)	1009	123	223	40	8
ENSG00000103253	CGnon-mito(3551)	32	5	2	0	9
ENSG00000103275	CGnon-mito(3551)	169	19	20	31	18
ENSG00000103319	CGnon-mito(3551)	437	47	65	17	14
ENSG00000103342	CGnon-mito(3551)	465	51	45	143	70
ENSG00000103363	CGnon-mito(3551)	421	30	56	58	26
ENSG00000103415	CGnon-mito(3551)	107	36	18	15	60
ENSG00000103479	CGnon-mito(3551)	735	65	132	63	8
ENSG00000103490	CGnon-mito(3551)	32	7	6	2	6
ENSG00000103495	CGnon-mito(3551)	1167	95	181	144	26
ENSG00000103502	CGnon-mito(3551)	99	14	7	15	14
ENSG00000103653	CGnon-mito(3551)	624	72	84	82	57
ENSG00000103671	CGnon-mito(3551)	904	60	125	43	11
ENSG00000103769	CGnon-mito(3551)	177	12	21	33	9
ENSG00000104064	CGnon-mito(3551)	1361	154	288	72	10
ENSG00000104129	CGnon-mito(3551)	251	8	14	69	13
ENSG00000104154	CGnon-mito(3551)	34	11	9	0	3
ENSG00000104177	CGnon-mito(3551)	1109	70	133	98	25
ENSG00000104205	CGnon-mito(3551)	295	28	47	15	10
ENSG00000104231	CGnon-mito(3551)	2	1	0	0	1
ENSG00000104312	CGnon-mito(3551)	201	21	24	8	6
ENSG00000104343	CGnon-mito(3551)	1127	138	256	41	9
ENSG00000104356	CGnon-mito(3551)	108	6	5	31	7
ENSG00000104365	CGnon-mito(3551)	442	55	70	38	33
ENSG00000104375	CGnon-mito(3551)	294	26	45	16	14
ENSG00000104522	CGnon-mito(3551)	205	54	17	28	55
ENSG00000104524	CGnon-mito(3551)	31	11	1	9	16
ENSG00000104529	CGnon-mito(3551)	207	22	10	58	24
ENSG00000104549	CGnon-mito(3551)	132	45	14	27	73
ENSG00000104643	CGnon-mito(3551)	67	12	8	3	1
ENSG00000104671	CGnon-mito(3551)	34	5	5	8	10
ENSG00000104689	CGnon-mito(3551)	73	13	11	2	9
ENSG00000104695	CGnon-mito(3551)	94	11	7	12	12
ENSG00000104738	CGnon-mito(3551)	1032	99	164	132	54
ENSG00000104762	CGnon-mito(3551)	174	16	14	27	25
ENSG00000104765	CGnon-mito(3551)	16	6	5	0	5
ENSG00000104777	CGnon-mito(3551)	1125	156	286	47	7
ENSG00000104808	CGnon-mito(3551)	13	4	1	1	4
ENSG00000104814	CGnon-mito(3551)	422	40	58	25	18
ENSG00000104824	CGnon-mito(3551)	428	16	20	106	31
ENSG00000104833	CGnon-mito(3551)	77	10	8	7	3
ENSG00000104852	CGnon-mito(3551)	592	34	34	149	58
ENSG00000104856	CGnon-mito(3551)	1387	166	305	78	12
ENSG00000104859	CGnon-mito(3551)	380	14	17	96	22
ENSG00000104872	CGnon-mito(3551)	41	13	2	4	26
ENSG00000104880	CGnon-mito(3551)	62	5	4	17	7
ENSG00000104897	CGnon-mito(3551)	302	12	17	80	10
ENSG00000104904	CGnon-mito(3551)	66	7	5	11	15
ENSG00000104951	CGnon-mito(3551)	276	63	28	59	107
ENSG00000104953	CGnon-mito(3551)	1849	190	345	95	15
ENSG00000104960	CGnon-mito(3551)	147	23	11	41	50
ENSG00000104976	CGnon-mito(3551)	843	92	170	28	6
ENSG00000105053	CGnon-mito(3551)	268	25	41	14	9
ENSG00000105063	CGnon-mito(3551)	351	85	33	77	150
ENSG00000105135	CGnon-mito(3551)	11	4	3	0	8
ENSG00000105141	CGnon-mito(3551)	15	2	2	0	1
ENSG00000105143	CGnon-mito(3551)	66	14	8	4	16
ENSG00000105146	CGnon-mito(3551)	242	23	31	5	6
ENSG00000105171	CGnon-mito(3551)	567	32	30	149	70
ENSG00000105202	CGnon-mito(3551)	445	27	34	136	30
ENSG00000105204	CGnon-mito(3551)	472	47	82	40	9
ENSG00000105221	CGnon-mito(3551)	295	22	41	14	10
ENSG00000105229	CGnon-mito(3551)	781	56	123	70	10
ENSG00000105254	CGnon-mito(3551)	6	1	0	2	2
ENSG00000105258	CGnon-mito(3551)	1444	178	273	151	74
ENSG00000105281	CGnon-mito(3551)	61	12	6	5	17
ENSG00000105287	CGnon-mito(3551)	411	39	49	39	24
ENSG00000105323	CGnon-mito(3551)	640	32	46	142	32
ENSG00000105327	CGnon-mito(3551)	11	3	3	0	5
ENSG00000105397	CGnon-mito(3551)	498	70	81	49	39
ENSG00000105398	CGnon-mito(3551)	21	4	0	2	2
ENSG00000105401	CGnon-mito(3551)	110	12	21	28	20
ENSG00000105419	CGnon-mito(3551)	1222	152	285	45	8
ENSG00000105486	CGnon-mito(3551)	431	56	65	118	62
ENSG00000105497	CGnon-mito(3551)	1220	153	293	67	9
ENSG00000105568	CGnon-mito(3551)	541	58	58	94	53
ENSG00000105610	CGnon-mito(3551)	752	95	167	22	5
ENSG00000105613	CGnon-mito(3551)	228	22	32	7	7
ENSG00000105640	CGnon-mito(3551)	487	18	10	99	92
ENSG00000105647	CGnon-mito(3551)	177	21	46	14	5
ENSG00000105648	CGnon-mito(3551)	6	2	1	1	2
ENSG00000105655	CGnon-mito(3551)	40	8	3	3	10
ENSG00000105656	CGnon-mito(3551)	74	6	8	17	1
ENSG00000105663	CGnon-mito(3551)	1284	157	291	79	10
ENSG00000105672	CGnon-mito(3551)	1038	133	244	31	6
ENSG00000105675	CGnon-mito(3551)	116	14	11	7	29
ENSG00000105679	CGnon-mito(3551)	98	33	10	13	41
ENSG00000105698	CGnon-mito(3551)	1082	133	226	45	8
ENSG00000105705	CGnon-mito(3551)	402	14	20	94	24
ENSG00000105717	CGnon-mito(3551)	1157	142	259	33	9
ENSG00000105722	CGnon-mito(3551)	1285	142	260	75	11
ENSG00000105723	CGnon-mito(3551)	287	24	44	22	18
ENSG00000105726	CGnon-mito(3551)	7	2	2	4	1
ENSG00000105750	CGnon-mito(3551)	1326	168	310	81	9
ENSG00000105810	CGnon-mito(3551)	161	13	21	19	2
ENSG00000105821	CGnon-mito(3551)	325	21	27	85	33
ENSG00000105849	CGnon-mito(3551)	49	4	3	27	7
ENSG00000105865	CGnon-mito(3551)	311	29	19	60	68
ENSG00000105866	CGnon-mito(3551)	639	61	113	20	5
ENSG00000105889	CGnon-mito(3551)	273	6	2	43	69
ENSG00000105968	CGnon-mito(3551)	392	37	54	101	27
ENSG00000105993	CGnon-mito(3551)	48	4	2	11	7
ENSG00000105996	CGnon-mito(3551)	1015	131	241	30	6
ENSG00000105997	CGnon-mito(3551)	1163	145	265	60	7
ENSG00000106004	CGnon-mito(3551)	1005	130	236	30	7
ENSG00000106006	CGnon-mito(3551)	1006	130	240	28	6
ENSG00000106038	CGnon-mito(3551)	994	127	230	28	6
ENSG00000106100	CGnon-mito(3551)	35	7	10	4	2
ENSG00000106123	CGnon-mito(3551)	93	14	19	0	1
ENSG00000106144	CGnon-mito(3551)	15	3	3	0	2
ENSG00000106245	CGnon-mito(3551)	1281	146	261	75	10
ENSG00000106258	CGnon-mito(3551)	47	13	5	1	13
ENSG00000106261	CGnon-mito(3551)	1300	166	310	76	8
ENSG00000106263	CGnon-mito(3551)	737	59	52	226	103
ENSG00000106290	CGnon-mito(3551)	1494	163	291	112	15
ENSG00000106305	CGnon-mito(3551)	233	22	24	79	40
ENSG00000106344	CGnon-mito(3551)	362	15	18	118	31
ENSG00000106355	CGnon-mito(3551)	370	12	18	80	24
ENSG00000106397	CGnon-mito(3551)	84	30	9	6	51
ENSG00000106399	CGnon-mito(3551)	281	43	47	78	27
ENSG00000106410	CGnon-mito(3551)	1222	152	285	45	8
ENSG00000106459	CGnon-mito(3551)	1070	123	235	34	7
ENSG00000106462	CGnon-mito(3551)	914	85	154	87	11
ENSG00000106479	CGnon-mito(3551)	564	65	98	30	6
ENSG00000106511	CGnon-mito(3551)	1021	131	241	32	6
ENSG00000106580	CGnon-mito(3551)	10	4	1	0	6
ENSG00000106588	CGnon-mito(3551)	105	5	11	39	4
ENSG00000106605	CGnon-mito(3551)	36	14	8	4	12
ENSG00000106628	CGnon-mito(3551)	271	44	34	89	48
ENSG00000106688	CGnon-mito(3551)	64	13	8	4	16
ENSG00000106689	CGnon-mito(3551)	1003	137	257	30	5
ENSG00000106789	CGnon-mito(3551)	29	8	2	7	12
ENSG00000106829	CGnon-mito(3551)	1822	188	342	93	15
ENSG00000106852	CGnon-mito(3551)	929	123	227	35	6
ENSG00000106853	CGnon-mito(3551)	38	10	5	3	5
ENSG00000107105	CGnon-mito(3551)	885	48	77	84	19
ENSG00000107140	CGnon-mito(3551)	308	25	47	15	9
ENSG00000107164	CGnon-mito(3551)	1470	171	309	85	15
ENSG00000107242	CGnon-mito(3551)	225	19	46	23	9
ENSG00000107262	CGnon-mito(3551)	86	16	18	12	21
ENSG00000107371	CGnon-mito(3551)	303	12	16	86	16
ENSG00000107447	CGnon-mito(3551)	48	4	4	11	5
ENSG00000107566	CGnon-mito(3551)	532	65	81	46	36
ENSG00000107581	CGnon-mito(3551)	339	24	19	108	43
ENSG00000107625	CGnon-mito(3551)	656	41	34	171	84
ENSG00000107643	CGnon-mito(3551)	202	14	18	7	7
ENSG00000107758	CGnon-mito(3551)	751	43	79	37	25
ENSG00000107796	CGnon-mito(3551)	36	10	6	8	3
ENSG00000107833	CGnon-mito(3551)	63	13	8	19	22
ENSG00000107968	CGnon-mito(3551)	194	17	30	3	5
ENSG00000108039	CGnon-mito(3551)	50	4	4	13	11
ENSG00000108061	CGnon-mito(3551)	102	15	18	13	4
ENSG00000108094	CGnon-mito(3551)	119	15	26	27	11
ENSG00000108106	CGnon-mito(3551)	270	20	31	67	23
ENSG00000108107	CGnon-mito(3551)	688	35	29	141	104
ENSG00000108176	CGnon-mito(3551)	49	3	1	15	6
ENSG00000108242	CGnon-mito(3551)	17	4	3	0	7
ENSG00000108264	CGnon-mito(3551)	1127	117	223	51	8
ENSG00000108270	CGnon-mito(3551)	188	26	38	42	9
ENSG00000108278	CGnon-mito(3551)	1164	91	173	84	24
ENSG00000108294	CGnon-mito(3551)	260	29	17	76	76
ENSG00000108298	CGnon-mito(3551)	698	42	37	140	106
ENSG00000108312	CGnon-mito(3551)	1163	108	198	94	13
ENSG00000108349	CGnon-mito(3551)	427	15	21	101	25
ENSG00000108384	CGnon-mito(3551)	307	39	37	78	65
ENSG00000108389	CGnon-mito(3551)	115	16	18	10	19
ENSG00000108406	CGnon-mito(3551)	167	21	15	37	26
ENSG00000108423	CGnon-mito(3551)	67	5	6	13	1
ENSG00000108424	CGnon-mito(3551)	162	16	17	56	18
ENSG00000108443	CGnon-mito(3551)	373	42	59	26	20
ENSG00000108468	CGnon-mito(3551)	135	10	24	15	5
ENSG00000108469	CGnon-mito(3551)	70	7	6	11	17
ENSG00000108474	CGnon-mito(3551)	35	3	4	14	2
ENSG00000108504	CGnon-mito(3551)	201	16	25	16	10
ENSG00000108510	CGnon-mito(3551)	593	51	116	55	6
ENSG00000108511	CGnon-mito(3551)	1187	149	271	58	8
ENSG00000108523	CGnon-mito(3551)	102	8	9	32	20
ENSG00000108578	CGnon-mito(3551)	102	17	9	30	19
ENSG00000108592	CGnon-mito(3551)	201	44	17	44	104
ENSG00000108602	CGnon-mito(3551)	56	11	1	1	10
ENSG00000108654	CGnon-mito(3551)	151	9	11	42	9
ENSG00000108773	CGnon-mito(3551)	566	53	112	52	15
ENSG00000108785	CGnon-mito(3551)	20	5	2	2	12
ENSG00000108786	CGnon-mito(3551)	65	21	3	10	23
ENSG00000108788	CGnon-mito(3551)	1295	158	286	69	9
ENSG00000108813	CGnon-mito(3551)	1026	133	240	30	6
ENSG00000108819	CGnon-mito(3551)	75	2	7	10	3
ENSG00000108825	CGnon-mito(3551)	134	18	7	55	53
ENSG00000108839	CGnon-mito(3551)	110	32	11	7	24
ENSG00000108840	CGnon-mito(3551)	309	35	55	34	5
ENSG00000108848	CGnon-mito(3551)	405	16	20	104	24
ENSG00000108854	CGnon-mito(3551)	318	25	38	56	17
ENSG00000108861	CGnon-mito(3551)	105	9	8	3	2
ENSG00000108883	CGnon-mito(3551)	160	6	6	44	2
ENSG00000108924	CGnon-mito(3551)	157	2	7	4	3
ENSG00000108984	CGnon-mito(3551)	366	39	58	21	13
ENSG00000109065	CGnon-mito(3551)	14	3	1	3	2
ENSG00000109066	CGnon-mito(3551)	50	11	4	4	15
ENSG00000109107	CGnon-mito(3551)	88	29	10	17	25
ENSG00000109111	CGnon-mito(3551)	1530	162	300	98	26
ENSG00000109181	CGnon-mito(3551)	20	8	1	3	4
ENSG00000109193	CGnon-mito(3551)	32	8	1	1	6
ENSG00000109320	CGnon-mito(3551)	1366	151	273	65	13
ENSG00000109332	CGnon-mito(3551)	227	16	20	46	21
ENSG00000109339	CGnon-mito(3551)	345	30	44	15	8
ENSG00000109381	CGnon-mito(3551)	1138	132	252	41	9
ENSG00000109475	CGnon-mito(3551)	580	30	18	113	96
ENSG00000109534	CGnon-mito(3551)	438	17	22	122	35
ENSG00000109536	CGnon-mito(3551)	389	14	17	105	23
ENSG00000109576	CGnon-mito(3551)	17	4	1	1	7
ENSG00000109606	CGnon-mito(3551)	819	74	59	237	111
ENSG00000109618	CGnon-mito(3551)	5	1	1	1	1
ENSG00000109654	CGnon-mito(3551)	10	1	2	1	2
ENSG00000109705	CGnon-mito(3551)	720	76	127	12	6
ENSG00000109787	CGnon-mito(3551)	915	117	229	33	5
ENSG00000109814	CGnon-mito(3551)	167	55	14	19	33
ENSG00000109819	CGnon-mito(3551)	682	27	57	91	18
ENSG00000109906	CGnon-mito(3551)	981	118	223	63	6
ENSG00000109971	CGnon-mito(3551)	250	22	26	71	67
ENSG00000110011	CGnon-mito(3551)	40	3	1	9	5
ENSG00000110025	CGnon-mito(3551)	124	12	9	38	7
ENSG00000110046	CGnon-mito(3551)	5	1	0	0	1
ENSG00000110047	CGnon-mito(3551)	134	14	16	30	20
ENSG00000110048	CGnon-mito(3551)	18	5	1	1	5
ENSG00000110060	CGnon-mito(3551)	80	5	1	28	10
ENSG00000110063	CGnon-mito(3551)	23	2	0	3	5
ENSG00000110075	CGnon-mito(3551)	28	4	0	10	6
ENSG00000110107	CGnon-mito(3551)	290	39	40	92	34
ENSG00000110171	CGnon-mito(3551)	11	1	2	2	2
ENSG00000110195	CGnon-mito(3551)	17	2	4	0	1
ENSG00000110200	CGnon-mito(3551)	33	2	3	7	9
ENSG00000110203	CGnon-mito(3551)	4	1	1	0	1
ENSG00000110245	CGnon-mito(3551)	32	9	3	4	3
ENSG00000110321	CGnon-mito(3551)	455	27	25	112	38
ENSG00000110330	CGnon-mito(3551)	255	33	43	47	23
ENSG00000110344	CGnon-mito(3551)	355	36	22	76	46
ENSG00000110375	CGnon-mito(3551)	3	1	0	0	3
ENSG00000110395	CGnon-mito(3551)	167	26	34	27	17
ENSG00000110422	CGnon-mito(3551)	505	37	73	65	21
ENSG00000110436	CGnon-mito(3551)	63	14	7	4	16
ENSG00000110583	CGnon-mito(3551)	22	5	3	4	3
ENSG00000110619	CGnon-mito(3551)	577	50	41	131	88
ENSG00000110693	CGnon-mito(3551)	1162	139	257	43	7
ENSG00000110696	CGnon-mito(3551)	212	13	20	50	19
ENSG00000110768	CGnon-mito(3551)	619	62	105	102	14
ENSG00000110801	CGnon-mito(3551)	149	9	12	40	9
ENSG00000110887	CGnon-mito(3551)	13	5	1	4	8
ENSG00000110917	CGnon-mito(3551)	6	1	1	3	2
ENSG00000110931	CGnon-mito(3551)	372	36	54	24	15
ENSG00000110958	CGnon-mito(3551)	747	94	91	171	116
ENSG00000111049	CGnon-mito(3551)	818	95	172	18	6
ENSG00000111142	CGnon-mito(3551)	42	3	5	13	8
ENSG00000111145	CGnon-mito(3551)	1201	132	244	56	10
ENSG00000111206	CGnon-mito(3551)	1246	127	241	89	14
ENSG00000111229	CGnon-mito(3551)	119	15	12	27	12
ENSG00000111231	CGnon-mito(3551)	202	28	27	76	45
ENSG00000111247	CGnon-mito(3551)	342	34	41	83	21
ENSG00000111249	CGnon-mito(3551)	1035	133	244	30	6
ENSG00000111266	CGnon-mito(3551)	66	6	7	4	2
ENSG00000111269	CGnon-mito(3551)	1369	162	297	74	10
ENSG00000111325	CGnon-mito(3551)	9	1	1	1	1
ENSG00000111328	CGnon-mito(3551)	48	11	11	11	4
ENSG00000111348	CGnon-mito(3551)	83	11	13	11	3
ENSG00000111358	CGnon-mito(3551)	1357	166	297	94	10
ENSG00000111371	CGnon-mito(3551)	52	10	6	4	14
ENSG00000111445	CGnon-mito(3551)	321	55	53	86	43
ENSG00000111540	CGnon-mito(3551)	100	10	9	14	4
ENSG00000111605	CGnon-mito(3551)	531	22	28	135	49
ENSG00000111640	CGnon-mito(3551)	257	66	24	45	118
ENSG00000111641	CGnon-mito(3551)	95	9	9	54	10
ENSG00000111642	CGnon-mito(3551)	687	66	120	96	49
ENSG00000111653	CGnon-mito(3551)	277	9	24	18	5
ENSG00000111674	CGnon-mito(3551)	71	25	6	12	24
ENSG00000111679	CGnon-mito(3551)	206	30	29	9	8
ENSG00000111701	CGnon-mito(3551)	312	12	17	75	12
ENSG00000111704	CGnon-mito(3551)	1222	152	284	45	8
ENSG00000111725	CGnon-mito(3551)	70	20	8	8	11
ENSG00000111780	CGnon-mito(3551)	81	7	5	32	32
ENSG00000111785	CGnon-mito(3551)	4	2	0	0	1
ENSG00000111786	CGnon-mito(3551)	628	26	30	168	65
ENSG00000111788	CGnon-mito(3551)	278	47	32	31	82
ENSG00000111816	CGnon-mito(3551)	190	19	32	8	1
ENSG00000111837	CGnon-mito(3551)	126	11	13	4	3
ENSG00000111875	CGnon-mito(3551)	495	35	85	51	6
ENSG00000111880	CGnon-mito(3551)	543	35	52	132	27
ENSG00000111962	CGnon-mito(3551)	38	11	2	2	5
ENSG00000111964	CGnon-mito(3551)	36	13	5	2	4
ENSG00000111968	CGnon-mito(3551)	305	32	45	84	35
ENSG00000111980	CGnon-mito(3551)	18	11	3	1	13
ENSG00000111987	CGnon-mito(3551)	545	22	27	143	39
ENSG00000112029	CGnon-mito(3551)	83	8	6	25	13
ENSG00000112033	CGnon-mito(3551)	1184	138	239	60	17
ENSG00000112043	CGnon-mito(3551)	1038	132	243	37	6
ENSG00000112062	CGnon-mito(3551)	577	63	83	60	48
ENSG00000112079	CGnon-mito(3551)	539	61	77	60	38
ENSG00000112081	CGnon-mito(3551)	565	26	31	140	42
ENSG00000112082	CGnon-mito(3551)	109	6	11	38	3
ENSG00000112118	CGnon-mito(3551)	1370	135	209	206	104
ENSG00000112144	CGnon-mito(3551)	291	19	41	18	12
ENSG00000112146	CGnon-mito(3551)	131	18	7	39	27
ENSG00000112159	CGnon-mito(3551)	410	42	50	116	74
ENSG00000112208	CGnon-mito(3551)	57	8	8	15	19
ENSG00000112237	CGnon-mito(3551)	1843	187	333	110	28
ENSG00000112242	CGnon-mito(3551)	1283	136	261	74	11
ENSG00000112246	CGnon-mito(3551)	958	121	212	28	6
ENSG00000112249	CGnon-mito(3551)	1141	89	149	110	52
ENSG00000112303	CGnon-mito(3551)	4	2	1	2	2
ENSG00000112306	CGnon-mito(3551)	634	31	26	128	101
ENSG00000112333	CGnon-mito(3551)	1202	139	234	59	9
ENSG00000112339	CGnon-mito(3551)	15	3	0	3	5
ENSG00000112343	CGnon-mito(3551)	102	9	17	21	13
ENSG00000112472	CGnon-mito(3551)	1542	173	318	85	15
ENSG00000112477	CGnon-mito(3551)	466	45	73	35	9
ENSG00000112489	CGnon-mito(3551)	69	11	10	20	23
ENSG00000112493	CGnon-mito(3551)	194	25	17	35	12
ENSG00000112511	CGnon-mito(3551)	1251	154	273	51	7
ENSG00000112561	CGnon-mito(3551)	1237	156	277	62	9
ENSG00000112578	CGnon-mito(3551)	39	5	2	29	4
ENSG00000112624	CGnon-mito(3551)	9	2	1	1	1
ENSG00000112655	CGnon-mito(3551)	110	7	9	2	1
ENSG00000112658	CGnon-mito(3551)	1265	140	262	71	9
ENSG00000112659	CGnon-mito(3551)	82	13	11	30	16
ENSG00000112664	CGnon-mito(3551)	217	21	19	53	15
ENSG00000112679	CGnon-mito(3551)	44	4	5	3	1
ENSG00000112699	CGnon-mito(3551)	55	15	5	9	14
ENSG00000112739	CGnon-mito(3551)	857	78	91	148	75
ENSG00000112742	CGnon-mito(3551)	600	67	81	89	46
ENSG00000112759	CGnon-mito(3551)	51	9	6	18	5
ENSG00000112837	CGnon-mito(3551)	1166	143	266	44	8
ENSG00000112874	CGnon-mito(3551)	39	5	4	9	7
ENSG00000112893	CGnon-mito(3551)	43	8	5	8	3
ENSG00000112941	CGnon-mito(3551)	432	53	67	103	28
ENSG00000112977	CGnon-mito(3551)	53	11	12	4	11
ENSG00000112981	CGnon-mito(3551)	144	12	4	35	27
ENSG00000112983	CGnon-mito(3551)	1187	129	232	55	7
ENSG00000112984	CGnon-mito(3551)	99	9	8	28	4
ENSG00000113068	CGnon-mito(3551)	104	14	24	13	14
ENSG00000113163	CGnon-mito(3551)	192	13	23	6	6
ENSG00000113194	CGnon-mito(3551)	30	2	2	7	3
ENSG00000113196	CGnon-mito(3551)	848	99	183	19	6
ENSG00000113240	CGnon-mito(3551)	312	32	54	11	6
ENSG00000113263	CGnon-mito(3551)	123	10	17	0	5
ENSG00000113300	CGnon-mito(3551)	1505	115	198	129	27
ENSG00000113312	CGnon-mito(3551)	56	8	6	14	20
ENSG00000113328	CGnon-mito(3551)	100	17	29	21	8
ENSG00000113356	CGnon-mito(3551)	221	26	25	37	8
ENSG00000113360	CGnon-mito(3551)	414	15	22	105	28
ENSG00000113387	CGnon-mito(3551)	1283	118	219	112	21
ENSG00000113396	CGnon-mito(3551)	33	12	2	7	19
ENSG00000113430	CGnon-mito(3551)	1011	128	239	29	6
ENSG00000113522	CGnon-mito(3551)	151	25	21	28	28
ENSG00000113552	CGnon-mito(3551)	51	14	4	12	18
ENSG00000113569	CGnon-mito(3551)	52	9	5	14	6
ENSG00000113575	CGnon-mito(3551)	295	44	39	34	19
ENSG00000113643	CGnon-mito(3551)	562	72	54	136	112
ENSG00000113648	CGnon-mito(3551)	215	20	34	39	7
ENSG00000113649	CGnon-mito(3551)	707	55	123	82	13
ENSG00000113658	CGnon-mito(3551)	1240	154	272	63	8
ENSG00000113712	CGnon-mito(3551)	444	54	64	49	39
ENSG00000113716	CGnon-mito(3551)	830	75	150	78	12
ENSG00000113721	CGnon-mito(3551)	158	25	39	2	3
ENSG00000113722	CGnon-mito(3551)	1014	132	241	28	6
ENSG00000113732	CGnon-mito(3551)	215	37	16	22	74
ENSG00000113734	CGnon-mito(3551)	3	1	2	0	2
ENSG00000113761	CGnon-mito(3551)	271	8	16	68	15
ENSG00000113790	CGnon-mito(3551)	54	25	4	5	32
ENSG00000113810	CGnon-mito(3551)	204	20	29	57	15
ENSG00000113916	CGnon-mito(3551)	912	118	230	23	5
ENSG00000114030	CGnon-mito(3551)	53	8	9	18	6
ENSG00000114124	CGnon-mito(3551)	419	44	65	13	9
ENSG00000114125	CGnon-mito(3551)	49	7	11	16	8
ENSG00000114126	CGnon-mito(3551)	1130	128	239	50	9
ENSG00000114166	CGnon-mito(3551)	369	34	74	33	6
ENSG00000114268	CGnon-mito(3551)	15	5	2	1	3
ENSG00000114302	CGnon-mito(3551)	77	14	7	19	11
ENSG00000114391	CGnon-mito(3551)	337	9	4	61	82
ENSG00000114416	CGnon-mito(3551)	45	3	2	5	5
ENSG00000114446	CGnon-mito(3551)	1	1	1	0	1
ENSG00000114503	CGnon-mito(3551)	560	24	27	153	47
ENSG00000114514	CGnon-mito(3551)	979	98	184	67	8
ENSG00000114573	CGnon-mito(3551)	450	77	53	74	124
ENSG00000114650	CGnon-mito(3551)	514	45	84	63	8
ENSG00000114670	CGnon-mito(3551)	279	28	40	10	8
ENSG00000114698	CGnon-mito(3551)	7	1	1	0	3
ENSG00000114738	CGnon-mito(3551)	279	25	42	19	14
ENSG00000114767	CGnon-mito(3551)	417	17	25	106	34
ENSG00000114861	CGnon-mito(3551)	1126	156	285	47	7
ENSG00000114867	CGnon-mito(3551)	487	30	28	140	57
ENSG00000114902	CGnon-mito(3551)	23	4	1	4	3
ENSG00000114904	CGnon-mito(3551)	415	43	53	63	35
ENSG00000114942	CGnon-mito(3551)	277	22	10	83	44
ENSG00000114978	CGnon-mito(3551)	5	1	0	0	2
ENSG00000115041	CGnon-mito(3551)	1206	131	260	39	11
ENSG00000115053	CGnon-mito(3551)	860	57	68	241	93
ENSG00000115073	CGnon-mito(3551)	82	8	15	15	15
ENSG00000115091	CGnon-mito(3551)	173	15	11	50	18
ENSG00000115112	CGnon-mito(3551)	1030	121	227	37	9
ENSG00000115128	CGnon-mito(3551)	331	11	16	88	20
ENSG00000115137	CGnon-mito(3551)	47	3	1	14	5
ENSG00000115163	CGnon-mito(3551)	293	23	44	57	8
ENSG00000115194	CGnon-mito(3551)	35	11	9	0	3
ENSG00000115207	CGnon-mito(3551)	705	75	158	77	8
ENSG00000115216	CGnon-mito(3551)	301	26	40	11	7
ENSG00000115233	CGnon-mito(3551)	288	30	21	74	60
ENSG00000115241	CGnon-mito(3551)	279	34	36	75	52
ENSG00000115254	CGnon-mito(3551)	293	28	26	78	45
ENSG00000115268	CGnon-mito(3551)	391	20	5	81	93
ENSG00000115289	CGnon-mito(3551)	73	6	8	32	16
ENSG00000115297	CGnon-mito(3551)	1171	143	267	45	8
ENSG00000115310	CGnon-mito(3551)	39	6	5	3	7
ENSG00000115318	CGnon-mito(3551)	8	4	2	1	2
ENSG00000115421	CGnon-mito(3551)	337	11	19	87	18
ENSG00000115423	CGnon-mito(3551)	27	5	2	0	1
ENSG00000115507	CGnon-mito(3551)	1167	143	266	45	8
ENSG00000115514	CGnon-mito(3551)	67	18	8	9	23
ENSG00000115524	CGnon-mito(3551)	466	17	21	109	27
ENSG00000115568	CGnon-mito(3551)	1202	158	289	68	8
ENSG00000115590	CGnon-mito(3551)	11	1	3	0	1
ENSG00000115592	CGnon-mito(3551)	103	23	17	6	14
ENSG00000115594	CGnon-mito(3551)	30	2	3	0	1
ENSG00000115661	CGnon-mito(3551)	291	20	47	12	7
ENSG00000115677	CGnon-mito(3551)	235	29	15	62	25
ENSG00000115687	CGnon-mito(3551)	259	17	35	17	9
ENSG00000115694	CGnon-mito(3551)	432	48	66	53	46
ENSG00000115750	CGnon-mito(3551)	1080	137	246	40	5
ENSG00000115758	CGnon-mito(3551)	193	35	17	59	48
ENSG00000115816	CGnon-mito(3551)	792	57	119	95	12
ENSG00000115825	CGnon-mito(3551)	322	27	51	16	7
ENSG00000115844	CGnon-mito(3551)	974	122	217	31	7
ENSG00000115875	CGnon-mito(3551)	576	28	30	156	54
ENSG00000115902	CGnon-mito(3551)	59	11	6	4	16
ENSG00000115919	CGnon-mito(3551)	66	19	4	4	20
ENSG00000115942	CGnon-mito(3551)	804	71	138	86	11
ENSG00000115947	CGnon-mito(3551)	59	7	7	29	5
ENSG00000115977	CGnon-mito(3551)	298	23	46	21	13
ENSG00000116001	CGnon-mito(3551)	130	9	13	15	9
ENSG00000116016	CGnon-mito(3551)	1055	110	213	51	8
ENSG00000116017	CGnon-mito(3551)	1384	160	300	78	9
ENSG00000116030	CGnon-mito(3551)	207	18	27	39	16
ENSG00000116035	CGnon-mito(3551)	774	90	157	16	6
ENSG00000116044	CGnon-mito(3551)	1274	141	262	60	9
ENSG00000116106	CGnon-mito(3551)	92	14	18	0	1
ENSG00000116120	CGnon-mito(3551)	56	5	1	24	33
ENSG00000116132	CGnon-mito(3551)	1097	133	241	46	7
ENSG00000116138	CGnon-mito(3551)	48	3	1	14	5
ENSG00000116141	CGnon-mito(3551)	224	20	29	8	8
ENSG00000116161	CGnon-mito(3551)	136	14	19	30	23
ENSG00000116251	CGnon-mito(3551)	555	22	15	114	97
ENSG00000116337	CGnon-mito(3551)	106	15	11	8	26
ENSG00000116350	CGnon-mito(3551)	588	26	38	147	44
ENSG00000116406	CGnon-mito(3551)	102	21	9	11	4
ENSG00000116478	CGnon-mito(3551)	1805	194	340	154	64
ENSG00000116560	CGnon-mito(3551)	530	21	34	136	52
ENSG00000116584	CGnon-mito(3551)	238	30	33	33	8
ENSG00000116604	CGnon-mito(3551)	1010	111	205	42	7
ENSG00000116649	CGnon-mito(3551)	73	18	8	18	27
ENSG00000116675	CGnon-mito(3551)	48	4	1	14	5
ENSG00000116717	CGnon-mito(3551)	112	16	27	24	8
ENSG00000116731	CGnon-mito(3551)	1254	166	301	69	9
ENSG00000116747	CGnon-mito(3551)	219	11	18	30	10
ENSG00000116752	CGnon-mito(3551)	457	18	26	105	32
ENSG00000116754	CGnon-mito(3551)	441	17	22	106	31
ENSG00000116783	CGnon-mito(3551)	30	3	3	10	2
ENSG00000116791	CGnon-mito(3551)	11	6	1	0	2
ENSG00000116793	CGnon-mito(3551)	1092	140	254	40	6
ENSG00000116819	CGnon-mito(3551)	1222	152	285	45	8
ENSG00000116830	CGnon-mito(3551)	965	73	134	122	65
ENSG00000116833	CGnon-mito(3551)	830	86	156	15	6
ENSG00000116852	CGnon-mito(3551)	80	5	7	23	2
ENSG00000116981	CGnon-mito(3551)	92	20	6	8	10
ENSG00000116990	CGnon-mito(3551)	1045	135	244	32	7
ENSG00000117020	CGnon-mito(3551)	142	13	19	3	4
ENSG00000117036	CGnon-mito(3551)	1222	152	285	45	8
ENSG00000117139	CGnon-mito(3551)	1033	134	245	29	6
ENSG00000117143	CGnon-mito(3551)	150	21	16	56	15
ENSG00000117151	CGnon-mito(3551)	11	5	1	1	3
ENSG00000117242	CGnon-mito(3551)	226	36	12	55	27
ENSG00000117245	CGnon-mito(3551)	60	5	5	11	1
ENSG00000117266	CGnon-mito(3551)	139	8	15	2	1
ENSG00000117385	CGnon-mito(3551)	7	2	1	1	1
ENSG00000117395	CGnon-mito(3551)	74	3	2	46	5
ENSG00000117410	CGnon-mito(3551)	330	53	27	47	109
ENSG00000117411	CGnon-mito(3551)	98	24	5	6	6
ENSG00000117448	CGnon-mito(3551)	207	66	16	41	93
ENSG00000117505	CGnon-mito(3551)	1169	102	190	85	12
ENSG00000117523	CGnon-mito(3551)	137	7	11	31	12
ENSG00000117569	CGnon-mito(3551)	331	12	17	79	21
ENSG00000117650	CGnon-mito(3551)	491	55	77	64	32
ENSG00000117676	CGnon-mito(3551)	444	53	66	45	45
ENSG00000117682	CGnon-mito(3551)	15	5	2	6	9
ENSG00000117713	CGnon-mito(3551)	373	20	44	13	3
ENSG00000117748	CGnon-mito(3551)	171	32	33	54	9
ENSG00000117751	CGnon-mito(3551)	731	46	42	166	93
ENSG00000118181	CGnon-mito(3551)	235	17	6	53	57
ENSG00000118193	CGnon-mito(3551)	84	8	7	22	3
ENSG00000118197	CGnon-mito(3551)	167	6	8	52	9
ENSG00000118217	CGnon-mito(3551)	1188	129	248	59	8
ENSG00000118245	CGnon-mito(3551)	508	30	69	46	5
ENSG00000118260	CGnon-mito(3551)	1442	165	314	81	10
ENSG00000118263	CGnon-mito(3551)	1171	133	245	35	7
ENSG00000118363	CGnon-mito(3551)	78	6	8	23	10
ENSG00000118412	CGnon-mito(3551)	18	6	7	0	6
ENSG00000118503	CGnon-mito(3551)	189	24	36	15	8
ENSG00000118513	CGnon-mito(3551)	1129	108	199	83	10
ENSG00000118515	CGnon-mito(3551)	192	19	24	8	6
ENSG00000118557	CGnon-mito(3551)	1052	137	250	34	6
ENSG00000118579	CGnon-mito(3551)	442	43	90	57	6
ENSG00000118639	CGnon-mito(3551)	82	6	10	27	15
ENSG00000118680	CGnon-mito(3551)	9	1	1	1	1
ENSG00000118707	CGnon-mito(3551)	1381	163	302	75	9
ENSG00000118900	CGnon-mito(3551)	1206	138	254	59	8
ENSG00000118903	CGnon-mito(3551)	1272	155	281	74	11
ENSG00000118922	CGnon-mito(3551)	951	125	223	34	7
ENSG00000118928	CGnon-mito(3551)	386	40	57	13	7
ENSG00000118939	CGnon-mito(3551)	233	18	15	47	37
ENSG00000118975	CGnon-mito(3551)	328	9	6	61	73
ENSG00000118990	CGnon-mito(3551)	65	24	7	8	37
ENSG00000119042	CGnon-mito(3551)	1247	150	277	62	9
ENSG00000119138	CGnon-mito(3551)	1069	137	260	50	8
ENSG00000119203	CGnon-mito(3551)	375	12	17	97	20
ENSG00000119314	CGnon-mito(3551)	389	14	22	91	27
ENSG00000119318	CGnon-mito(3551)	189	33	34	49	9
ENSG00000119335	CGnon-mito(3551)	178	9	27	30	7
ENSG00000119392	CGnon-mito(3551)	59	2	3	12	2
ENSG00000119396	CGnon-mito(3551)	171	13	17	27	11
ENSG00000119402	CGnon-mito(3551)	100	7	7	18	7
ENSG00000119408	CGnon-mito(3551)	502	61	89	17	10
ENSG00000119414	CGnon-mito(3551)	225	28	33	45	36
ENSG00000119541	CGnon-mito(3551)	842	97	140	110	55
ENSG00000119547	CGnon-mito(3551)	909	112	202	23	6
ENSG00000119638	CGnon-mito(3551)	440	47	54	60	37
ENSG00000119640	CGnon-mito(3551)	184	23	16	57	30
ENSG00000119682	CGnon-mito(3551)	182	17	18	37	20
ENSG00000119707	CGnon-mito(3551)	394	12	22	91	26
ENSG00000119715	CGnon-mito(3551)	1118	140	251	36	7
ENSG00000119760	CGnon-mito(3551)	1857	192	350	95	15
ENSG00000119826	CGnon-mito(3551)	273	6	2	43	69
ENSG00000119915	CGnon-mito(3551)	57	13	3	7	9
ENSG00000119919	CGnon-mito(3551)	1223	152	285	46	8
ENSG00000119953	CGnon-mito(3551)	539	23	29	128	37
ENSG00000119969	CGnon-mito(3551)	99	13	11	27	16
ENSG00000120068	CGnon-mito(3551)	1013	133	239	28	6
ENSG00000120075	CGnon-mito(3551)	1067	135	248	35	7
ENSG00000120087	CGnon-mito(3551)	998	127	233	28	6
ENSG00000120093	CGnon-mito(3551)	1166	143	267	44	8
ENSG00000120094	CGnon-mito(3551)	1008	130	239	28	7
ENSG00000120129	CGnon-mito(3551)	109	9	9	3	2
ENSG00000120137	CGnon-mito(3551)	13	3	2	4	3
ENSG00000120158	CGnon-mito(3551)	202	26	14	43	39
ENSG00000120314	CGnon-mito(3551)	1	1	0	0	1
ENSG00000120519	CGnon-mito(3551)	52	12	9	0	6
ENSG00000120616	CGnon-mito(3551)	126	8	22	7	1
ENSG00000120675	CGnon-mito(3551)	52	3	1	16	8
ENSG00000120688	CGnon-mito(3551)	231	8	12	58	4
ENSG00000120690	CGnon-mito(3551)	1529	178	320	91	12
ENSG00000120693	CGnon-mito(3551)	1872	194	353	96	16
ENSG00000120694	CGnon-mito(3551)	69	6	10	30	23
ENSG00000120699	CGnon-mito(3551)	666	42	41	178	62
ENSG00000120705	CGnon-mito(3551)	237	22	10	71	39
ENSG00000120738	CGnon-mito(3551)	1078	147	273	41	6
ENSG00000120742	CGnon-mito(3551)	279	36	14	64	37
ENSG00000120756	CGnon-mito(3551)	10	1	2	2	2
ENSG00000120798	CGnon-mito(3551)	1469	164	309	81	10
ENSG00000120800	CGnon-mito(3551)	41	4	2	28	2
ENSG00000120805	CGnon-mito(3551)	92	6	7	12	7
ENSG00000120837	CGnon-mito(3551)	1472	165	310	84	14
ENSG00000120868	CGnon-mito(3551)	32	8	9	1	8
ENSG00000120875	CGnon-mito(3551)	125	9	10	3	4
ENSG00000120899	CGnon-mito(3551)	461	53	75	34	28
ENSG00000120910	CGnon-mito(3551)	57	4	7	9	8
ENSG00000120948	CGnon-mito(3551)	2082	188	320	271	90
ENSG00000120992	CGnon-mito(3551)	139	19	9	27	33
ENSG00000121022	CGnon-mito(3551)	1173	113	192	179	84
ENSG00000121031	CGnon-mito(3551)	624	91	105	131	72
ENSG00000121054	CGnon-mito(3551)	2009	231	343	226	141
ENSG00000121068	CGnon-mito(3551)	999	127	234	28	6
ENSG00000121274	CGnon-mito(3551)	54	5	4	13	7
ENSG00000121281	CGnon-mito(3551)	120	17	10	25	8
ENSG00000121297	CGnon-mito(3551)	1125	156	286	47	7
ENSG00000121350	CGnon-mito(3551)	136	45	14	17	87
ENSG00000121390	CGnon-mito(3551)	210	7	14	56	10
ENSG00000121413	CGnon-mito(3551)	1103	150	271	47	7
ENSG00000121417	CGnon-mito(3551)	1100	149	269	46	6
ENSG00000121486	CGnon-mito(3551)	271	11	16	69	16
ENSG00000121579	CGnon-mito(3551)	30	9	3	7	4
ENSG00000121621	CGnon-mito(3551)	83	7	8	21	1
ENSG00000121774	CGnon-mito(3551)	1854	139	241	249	68
ENSG00000121848	CGnon-mito(3551)	83	7	6	32	18
ENSG00000121858	CGnon-mito(3551)	24	6	4	0	1
ENSG00000121900	CGnon-mito(3551)	61	21	5	8	25
ENSG00000121903	CGnon-mito(3551)	1125	156	286	47	7
ENSG00000121988	CGnon-mito(3551)	48	11	14	8	4
ENSG00000121989	CGnon-mito(3551)	244	32	51	4	1
ENSG00000122008	CGnon-mito(3551)	38	3	1	9	5
ENSG00000122025	CGnon-mito(3551)	100	14	17	1	3
ENSG00000122026	CGnon-mito(3551)	329	9	6	62	73
ENSG00000122034	CGnon-mito(3551)	1526	154	241	198	69
ENSG00000122180	CGnon-mito(3551)	765	84	155	17	6
ENSG00000122185	CGnon-mito(3551)	273	6	2	43	69
ENSG00000122257	CGnon-mito(3551)	78	8	12	30	15
ENSG00000122390	CGnon-mito(3551)	10	2	2	0	1
ENSG00000122406	CGnon-mito(3551)	671	35	27	148	104
ENSG00000122516	CGnon-mito(3551)	286	7	2	43	72
ENSG00000122565	CGnon-mito(3551)	680	56	114	85	15
ENSG00000122566	CGnon-mito(3551)	419	17	20	102	28
ENSG00000122592	CGnon-mito(3551)	1078	134	250	42	6
ENSG00000122678	CGnon-mito(3551)	42	3	1	12	5
ENSG00000122687	CGnon-mito(3551)	155	8	4	60	18
ENSG00000122705	CGnon-mito(3551)	28	4	3	3	10
ENSG00000122728	CGnon-mito(3551)	1536	163	302	59	20
ENSG00000122729	CGnon-mito(3551)	254	27	17	54	55
ENSG00000122733	CGnon-mito(3551)	289	16	44	13	2
ENSG00000122778	CGnon-mito(3551)	1222	152	285	45	8
ENSG00000122882	CGnon-mito(3551)	420	48	90	38	15
ENSG00000122884	CGnon-mito(3551)	98	39	14	11	47
ENSG00000122965	CGnon-mito(3551)	373	12	20	85	26
ENSG00000122966	CGnon-mito(3551)	480	55	63	48	43
ENSG00000123064	CGnon-mito(3551)	1361	78	132	214	75
ENSG00000123091	CGnon-mito(3551)	174	12	13	47	15
ENSG00000123095	CGnon-mito(3551)	1126	136	261	42	7
ENSG00000123124	CGnon-mito(3551)	127	12	15	33	16
ENSG00000123131	CGnon-mito(3551)	229	43	12	48	95
ENSG00000123136	CGnon-mito(3551)	646	54	51	189	74
ENSG00000123143	CGnon-mito(3551)	499	57	70	50	32
ENSG00000123179	CGnon-mito(3551)	10	2	1	3	3
ENSG00000123268	CGnon-mito(3551)	1527	169	315	91	16
ENSG00000123349	CGnon-mito(3551)	789	75	148	93	32
ENSG00000123358	CGnon-mito(3551)	1308	157	287	68	11
ENSG00000123364	CGnon-mito(3551)	907	112	202	22	6
ENSG00000123374	CGnon-mito(3551)	663	73	89	119	56
ENSG00000123388	CGnon-mito(3551)	1080	128	229	52	7
ENSG00000123405	CGnon-mito(3551)	981	115	212	34	7
ENSG00000123407	CGnon-mito(3551)	1166	143	267	44	8
ENSG00000123416	CGnon-mito(3551)	170	18	16	50	18
ENSG00000123505	CGnon-mito(3551)	61	15	8	12	15
ENSG00000123562	CGnon-mito(3551)	1590	95	194	107	13
ENSG00000123572	CGnon-mito(3551)	407	43	64	13	9
ENSG00000123576	CGnon-mito(3551)	1222	152	285	45	8
ENSG00000123612	CGnon-mito(3551)	459	56	83	17	9
ENSG00000123643	CGnon-mito(3551)	48	11	4	2	11
ENSG00000123684	CGnon-mito(3551)	57	7	3	10	9
ENSG00000123685	CGnon-mito(3551)	814	86	164	19	7
ENSG00000123737	CGnon-mito(3551)	423	16	24	107	28
ENSG00000123836	CGnon-mito(3551)	16	6	2	1	3
ENSG00000123870	CGnon-mito(3551)	1085	150	270	43	6
ENSG00000123933	CGnon-mito(3551)	730	58	119	39	7
ENSG00000123975	CGnon-mito(3551)	352	34	64	70	15
ENSG00000124140	CGnon-mito(3551)	117	25	8	4	17
ENSG00000124151	CGnon-mito(3551)	704	76	147	71	14
ENSG00000124155	CGnon-mito(3551)	88	8	4	21	6
ENSG00000124160	CGnon-mito(3551)	304	37	41	55	38
ENSG00000124193	CGnon-mito(3551)	445	19	22	115	33
ENSG00000124201	CGnon-mito(3551)	1222	152	285	45	8
ENSG00000124207	CGnon-mito(3551)	38	4	1	15	4
ENSG00000124208	CGnon-mito(3551)	486	37	79	71	11
ENSG00000124209	CGnon-mito(3551)	77	11	8	8	4
ENSG00000124214	CGnon-mito(3551)	360	15	23	83	24
ENSG00000124217	CGnon-mito(3551)	94	15	12	11	17
ENSG00000124226	CGnon-mito(3551)	50	5	7	17	6
ENSG00000124228	CGnon-mito(3551)	240	33	27	52	33
ENSG00000124232	CGnon-mito(3551)	1039	135	246	33	6
ENSG00000124251	CGnon-mito(3551)	26	2	3	0	3
ENSG00000124333	CGnon-mito(3551)	1213	148	282	44	8
ENSG00000124383	CGnon-mito(3551)	493	17	28	140	35
ENSG00000124406	CGnon-mito(3551)	40	10	4	3	6
ENSG00000124422	CGnon-mito(3551)	231	22	20	47	17
ENSG00000124440	CGnon-mito(3551)	1052	134	246	32	6
ENSG00000124459	CGnon-mito(3551)	1225	157	292	73	7
ENSG00000124487	CGnon-mito(3551)	718	72	71	158	76
ENSG00000124496	CGnon-mito(3551)	1073	129	242	55	9
ENSG00000124535	CGnon-mito(3551)	15	4	2	3	6
ENSG00000124536	CGnon-mito(3551)	275	6	2	45	70
ENSG00000124562	CGnon-mito(3551)	402	14	22	97	34
ENSG00000124588	CGnon-mito(3551)	44	14	4	4	33
ENSG00000124614	CGnon-mito(3551)	643	32	25	130	102
ENSG00000124641	CGnon-mito(3551)	643	60	109	91	17
ENSG00000124659	CGnon-mito(3551)	91	12	7	24	17
ENSG00000124664	CGnon-mito(3551)	1007	129	238	28	7
ENSG00000124701	CGnon-mito(3551)	296	10	15	74	16
ENSG00000124721	CGnon-mito(3551)	48	7	3	4	2
ENSG00000124762	CGnon-mito(3551)	134	17	40	28	9
ENSG00000124766	CGnon-mito(3551)	1285	157	281	68	9
ENSG00000124767	CGnon-mito(3551)	123	31	13	41	48
ENSG00000124782	CGnon-mito(3551)	765	64	131	60	7
ENSG00000124787	CGnon-mito(3551)	146	8	10	49	12
ENSG00000124795	CGnon-mito(3551)	1571	122	220	194	49
ENSG00000124831	CGnon-mito(3551)	1025	67	137	97	19
ENSG00000124860	CGnon-mito(3551)	475	59	87	13	9
ENSG00000125107	CGnon-mito(3551)	112	8	10	42	18
ENSG00000125257	CGnon-mito(3551)	37	2	1	5	12
ENSG00000125285	CGnon-mito(3551)	858	98	178	19	6
ENSG00000125337	CGnon-mito(3551)	61	4	2	18	1
ENSG00000125351	CGnon-mito(3551)	450	15	20	115	31
ENSG00000125352	CGnon-mito(3551)	174	16	13	48	35
ENSG00000125385	CGnon-mito(3551)	387	18	7	79	84
ENSG00000125388	CGnon-mito(3551)	120	9	8	2	1
ENSG00000125458	CGnon-mito(3551)	1382	173	298	61	21
ENSG00000125492	CGnon-mito(3551)	1222	152	285	45	8
ENSG00000125508	CGnon-mito(3551)	292	38	64	4	4
ENSG00000125520	CGnon-mito(3551)	1135	153	279	61	6
ENSG00000125630	CGnon-mito(3551)	111	11	9	40	11
ENSG00000125651	CGnon-mito(3551)	1156	91	171	124	28
ENSG00000125657	CGnon-mito(3551)	23	7	4	1	3
ENSG00000125676	CGnon-mito(3551)	518	19	25	125	35
ENSG00000125686	CGnon-mito(3551)	974	82	161	71	12
ENSG00000125695	CGnon-mito(3551)	286	28	43	13	8
ENSG00000125726	CGnon-mito(3551)	21	7	2	1	3
ENSG00000125733	CGnon-mito(3551)	32	6	6	6	2
ENSG00000125743	CGnon-mito(3551)	660	45	33	179	91
ENSG00000125798	CGnon-mito(3551)	1056	134	247	40	6
ENSG00000125816	CGnon-mito(3551)	1166	143	267	44	8
ENSG00000125820	CGnon-mito(3551)	971	123	218	28	6
ENSG00000125826	CGnon-mito(3551)	121	14	11	35	21
ENSG00000125834	CGnon-mito(3551)	476	59	87	14	9
ENSG00000125835	CGnon-mito(3551)	509	20	29	127	36
ENSG00000125846	CGnon-mito(3551)	1229	155	299	69	9
ENSG00000125864	CGnon-mito(3551)	267	10	16	66	15
ENSG00000125870	CGnon-mito(3551)	541	23	27	150	49
ENSG00000125878	CGnon-mito(3551)	817	98	172	18	6
ENSG00000125931	CGnon-mito(3551)	927	111	200	24	6
ENSG00000125944	CGnon-mito(3551)	593	32	40	161	61
ENSG00000125952	CGnon-mito(3551)	1072	136	249	35	6
ENSG00000125954	CGnon-mito(3551)	30	5	3	23	2
ENSG00000125970	CGnon-mito(3551)	466	26	34	130	43
ENSG00000125971	CGnon-mito(3551)	49	6	5	6	2
ENSG00000125976	CGnon-mito(3551)	245	13	13	57	17
ENSG00000125977	CGnon-mito(3551)	341	27	22	93	41
ENSG00000125979	CGnon-mito(3551)	212	11	26	31	4
ENSG00000126003	CGnon-mito(3551)	1312	167	308	77	8
ENSG00000126067	CGnon-mito(3551)	256	30	22	76	81
ENSG00000126215	CGnon-mito(3551)	140	16	17	28	25
ENSG00000126216	CGnon-mito(3551)	77	10	10	17	3
ENSG00000126261	CGnon-mito(3551)	721	66	57	134	89
ENSG00000126351	CGnon-mito(3551)	919	99	184	21	6
ENSG00000126368	CGnon-mito(3551)	1242	148	276	55	8
ENSG00000126456	CGnon-mito(3551)	1330	128	255	78	13
ENSG00000126457	CGnon-mito(3551)	273	43	24	77	65
ENSG00000126528	CGnon-mito(3551)	273	6	2	43	69
ENSG00000126561	CGnon-mito(3551)	1314	156	286	63	12
ENSG00000126581	CGnon-mito(3551)	83	9	11	5	5
ENSG00000126594	CGnon-mito(3551)	19	6	3	0	2
ENSG00000126656	CGnon-mito(3551)	1222	152	285	45	8
ENSG00000126698	CGnon-mito(3551)	189	14	13	55	24
ENSG00000126749	CGnon-mito(3551)	552	42	30	175	74
ENSG00000126756	CGnon-mito(3551)	67	1	1	19	8
ENSG00000126767	CGnon-mito(3551)	1322	156	293	72	9
ENSG00000126777	CGnon-mito(3551)	99	7	9	24	2
ENSG00000126934	CGnon-mito(3551)	292	27	46	18	16
ENSG00000126945	CGnon-mito(3551)	388	21	26	101	26
ENSG00000126952	CGnon-mito(3551)	322	9	16	80	19
ENSG00000127022	CGnon-mito(3551)	148	20	15	32	38
ENSG00000127124	CGnon-mito(3551)	1001	140	255	29	6
ENSG00000127125	CGnon-mito(3551)	37	5	2	21	20
ENSG00000127191	CGnon-mito(3551)	63	8	11	8	6
ENSG00000127266	CGnon-mito(3551)	273	6	2	43	69
ENSG00000127334	CGnon-mito(3551)	244	19	37	10	6
ENSG00000127445	CGnon-mito(3551)	85	6	6	12	16
ENSG00000127481	CGnon-mito(3551)	182	18	19	39	20
ENSG00000127528	CGnon-mito(3551)	1054	145	268	35	6
ENSG00000127564	CGnon-mito(3551)	503	57	78	78	38
ENSG00000127589	CGnon-mito(3551)	58	6	6	1	2
ENSG00000127616	CGnon-mito(3551)	1594	181	309	142	59
ENSG00000127824	CGnon-mito(3551)	87	7	6	16	3
ENSG00000127870	CGnon-mito(3551)	245	28	21	59	35
ENSG00000127922	CGnon-mito(3551)	86	11	4	32	27
ENSG00000127946	CGnon-mito(3551)	13	2	4	1	1
ENSG00000127952	CGnon-mito(3551)	42	6	4	3	1
ENSG00000127957	CGnon-mito(3551)	1427	131	219	118	43
ENSG00000128016	CGnon-mito(3551)	241	12	18	50	11
ENSG00000128050	CGnon-mito(3551)	279	53	31	86	78
ENSG00000128052	CGnon-mito(3551)	196	22	42	9	3
ENSG00000128059	CGnon-mito(3551)	97	16	10	20	30
ENSG00000128159	CGnon-mito(3551)	40	8	5	8	2
ENSG00000128185	CGnon-mito(3551)	1033	133	245	29	6
ENSG00000128191	CGnon-mito(3551)	305	11	17	79	20
ENSG00000128245	CGnon-mito(3551)	173	24	34	20	10
ENSG00000128272	CGnon-mito(3551)	930	71	147	73	7
ENSG00000128284	CGnon-mito(3551)	34	9	4	4	3
ENSG00000128294	CGnon-mito(3551)	50	14	4	5	7
ENSG00000128394	CGnon-mito(3551)	157	14	12	23	13
ENSG00000128513	CGnon-mito(3551)	80	14	12	25	7
ENSG00000128524	CGnon-mito(3551)	306	48	23	38	97
ENSG00000128534	CGnon-mito(3551)	483	14	23	110	30
ENSG00000128590	CGnon-mito(3551)	53	3	2	14	5
ENSG00000128604	CGnon-mito(3551)	1291	155	287	68	9
ENSG00000128605	CGnon-mito(3551)	8	5	1	0	5
ENSG00000128645	CGnon-mito(3551)	1021	131	239	32	6
ENSG00000128652	CGnon-mito(3551)	1010	131	241	28	6
ENSG00000128708	CGnon-mito(3551)	285	34	33	93	58
ENSG00000128709	CGnon-mito(3551)	945	116	213	23	7
ENSG00000128713	CGnon-mito(3551)	1004	129	239	28	6
ENSG00000128731	CGnon-mito(3551)	88	11	9	26	14
ENSG00000128739	CGnon-mito(3551)	454	15	25	104	31
ENSG00000128829	CGnon-mito(3551)	579	65	93	49	48
ENSG00000128989	CGnon-mito(3551)	66	17	11	12	12
ENSG00000129071	CGnon-mito(3551)	185	36	37	29	9
ENSG00000129083	CGnon-mito(3551)	121	5	7	31	7
ENSG00000129084	CGnon-mito(3551)	436	34	27	110	53
ENSG00000129116	CGnon-mito(3551)	68	6	8	0	1
ENSG00000129151	CGnon-mito(3551)	21	5	2	0	10
ENSG00000129152	CGnon-mito(3551)	876	99	192	27	7
ENSG00000129167	CGnon-mito(3551)	88	38	13	5	30
[truncated: 2,740 more rows]
