# Supplementary material for: Mapping Gene Associations in Human Mitochondria using Clinical Disease Phenotypes
Source: PLoS Comput Biol. 2009 Apr 24;5(4):e1000374. doi: 10.1371/journal.pcbi.1000374 (PMC2668170; doi:10.1371/journal.pcbi.1000374)
Supplement: Table S8 — 695 mitochondrial genes including newly predicted disease candidate genes. (0.20 MB XLS) [file pcbi.1000374.s011.xls]

## Sheet: TableS7
ENSEMBL-GENE	GROUP-LABEL(TABLE2)	DA_Input-label	DA_SqDist(Actual)	DA_Prob(Actual)	DA_[-LOG(Prob)]	DA_Misclassified	DA_Predicted	DA_Prob(Pred)	-	BN_Training-set	BN_Input-label	BN_Predicted	BN_error	BN_probability-CG	BN_probability-DG	Overlap_DA-BN(168 genes)
ENSG00000113504	CGmito(495)	CG	6.5815	0.377705	0.973641	*	DG	0.622295	-	1	1:CG	2:DG	+	0.247	*0.753	yes
ENSG00000124067	CGmito(495)	CG	4.09799	0.387603	0.947775	*	DG	0.612397	-	1	1:CG	2:DG	+	0.247	*0.753	yes
ENSG00000143149	CGmito(495)	CG	4.04908	0.427445	0.849929	*	DG	0.572555	-	1	1:CG	2:DG	+	0.247	*0.753	yes
ENSG00000159399	CGmito(495)	CG	8.25719	0.318794	1.14321	*	DG	0.681206	-	1	1:CG	2:DG	+	0.247	*0.753	yes
ENSG00000173992	CGmito(495)	CG	2.07367	0.368939	0.997123	*	DG	0.631061	-	1	1:CG	2:DG	+	0.247	*0.753	yes
ENSG00000197150	CGmito(495)	CG	2.02376	0.417702	0.872987	*	DG	0.582298	-	1	1:CG	2:DG	+	0.247	*0.753	yes
ENSG00000002330	CGmito(495)	CG	1.45252	0.47759	0.739002	*	DG	0.52241	-		1:CG	2:DG	+	0.001	*0.999	yes
ENSG00000003989	CGmito(495)	CG	0.96794	0.452713	0.792496	*	DG	0.547287	-		1:CG	2:DG	+	0.001	*0.999	yes
ENSG00000004799	CGmito(495)	CG	0.8216	0.4506	0.797175	*	DG	0.5494	-		1:CG	2:DG	+	0.001	*0.999	yes
ENSG00000005249	CGmito(495)	CG	1.51725	0.472464	0.749793	*	DG	0.527536	-		1:CG	2:DG	+	0.007	*0.993	yes
ENSG00000013293	CGmito(495)	CG	0.94912	0.459383	0.777871	*	DG	0.540617	-		1:CG	2:DG	+	0.001	*0.999	yes
ENSG00000015475	CGmito(495)	CG	1.59835	0.482364	0.729056	*	DG	0.517636	-		1:CG	2:DG	+	0.001	*0.999	yes
ENSG00000023330	CGmito(495)	CG	1.01049	0.403018	0.908774	*	DG	0.596982	-		1:CG	2:DG	+	0.007	*0.993	yes
ENSG00000023572	CGmito(495)	CG	0.543034	0.462844	0.770365	*	DG	0.537156	-		1:CG	2:DG	+	0.007	*0.993	yes
ENSG00000025772	CGmito(495)	CG	1.44853	0.493043	0.70716	*	DG	0.506957	-		1:CG	2:DG	+	0.001	*0.999	yes
ENSG00000027001	CGmito(495)	CG	1.34961	0.476243	0.741827	*	DG	0.523757	-		1:CG	2:DG	+	0.001	*0.999	yes
ENSG00000042286	CGmito(495)	CG	1.34438	0.48163	0.73058	*	DG	0.51837	-		1:CG	2:DG	+	0.001	*0.999	yes
ENSG00000060971	CGmito(495)	CG	3.63935	0.32949	1.11021	*	DG	0.67051	-		1:CG	2:DG	+	0.007	*0.993	yes
ENSG00000063241	CGmito(495)	CG	1.44532	0.47638	0.741539	*	DG	0.52362	-		1:CG	2:DG	+	0.001	*0.999	yes
ENSG00000065833	CGmito(495)	CG	0.794034	0.418842	0.870262	*	DG	0.581158	-		1:CG	2:DG	+	0.007	*0.993	yes
ENSG00000069535	CGmito(495)	CG	1.93071	0.419421	0.868879	*	DG	0.580579	-		1:CG	2:DG	+	0.001	*0.999	yes
ENSG00000078872	CGmito(495)	CG	2.62022	0.417823	0.872697	*	DG	0.582177	-		1:CG	2:DG	+	0.001	*0.999	yes
ENSG00000081181	CGmito(495)	CG	1.35332	0.386649	0.950238	*	DG	0.613351	-		1:CG	2:DG	+	0.001	*0.999	yes
ENSG00000083099	CGmito(495)	CG	1.1003	0.464745	0.766265	*	DG	0.535255	-		1:CG	2:DG	+	0.001	*0.999	yes
ENSG00000085491	CGmito(495)	CG	1.52261	0.478464	0.737175	*	DG	0.521536	-		1:CG	2:DG	+	0.001	*0.999	yes
ENSG00000088451	CGmito(495)	CG	1.42146	0.424473	0.856907	*	DG	0.575527	-		1:CG	2:DG	+	0.001	*0.999	yes
ENSG00000090857	CGmito(495)	CG	2.05374	0.389324	0.943343	*	DG	0.610676	-		1:CG	2:DG	+	0.001	*0.999	yes
ENSG00000095321	CGmito(495)	CG	1.03054	0.478585	0.736922	*	DG	0.521415	-		1:CG	2:DG	+	0.001	*0.999	yes
ENSG00000097033	CGmito(495)	CG	1.15463	0.446643	0.805997	*	DG	0.553357	-		1:CG	2:DG	+	0.001	*0.999	yes
ENSG00000099968	CGmito(495)	CG	1.37385	0.448209	0.802495	*	DG	0.551791	-		1:CG	2:DG	+	0.001	*0.999	yes
ENSG00000100075	CGmito(495)	CG	1.36126	0.498148	0.696859	*	DG	0.501852	-		1:CG	2:DG	+	0.001	*0.999	yes
ENSG00000100116	CGmito(495)	CG	1.28818	0.459265	0.778129	*	DG	0.540735	-		1:CG	2:DG	+	0.001	*0.999	yes
ENSG00000100216	CGmito(495)	CG	1.39435	0.493674	0.70588	*	DG	0.506326	-		1:CG	2:DG	+	0.001	*0.999	yes
ENSG00000100288	CGmito(495)	CG	1.11007	0.421125	0.864825	*	DG	0.578875	-		1:CG	2:DG	+	0.001	*0.999	yes
ENSG00000100445	CGmito(495)	CG	1.10462	0.479641	0.734718	*	DG	0.520359	-		1:CG	2:DG	+	0.001	*0.999	yes
ENSG00000100575	CGmito(495)	CG	1.36861	0.484731	0.724161	*	DG	0.515269	-		1:CG	2:DG	+	0.001	*0.999	yes
ENSG00000100577	CGmito(495)	CG	1.51938	0.407243	0.898345	*	DG	0.592757	-		1:CG	2:DG	+	0.001	*0.999	yes
ENSG00000100867	CGmito(495)	CG	1.35075	0.483273	0.727173	*	DG	0.516727	-		1:CG	2:DG	+	0.001	*0.999	yes
ENSG00000101473	CGmito(495)	CG	3.62404	0.392333	0.935645	*	DG	0.607667	-		1:CG	2:DG	+	0.247	*0.753	yes
ENSG00000102078	CGmito(495)	CG	1.46972	0.493143	0.706956	*	DG	0.506857	-		1:CG	2:DG	+	0.001	*0.999	yes
ENSG00000103152	CGmito(495)	CG	1.26086	0.456118	0.785004	*	DG	0.543882	-		1:CG	2:DG	+	0.001	*0.999	yes
ENSG00000103257	CGmito(495)	CG	0.853471	0.448496	0.801856	*	DG	0.551504	-		1:CG	2:DG	+	0.001	*0.999	yes
ENSG00000103507	CGmito(495)	CG	0.981193	0.421268	0.864486	*	DG	0.578732	-		1:CG	2:DG	+	0.001	*0.999	yes
ENSG00000103707	CGmito(495)	CG	1.03148	0.483064	0.727605	*	DG	0.516936	-		1:CG	2:DG	+	0.001	*0.999	yes
ENSG00000105819	CGmito(495)	CG	1.08147	0.494064	0.705091	*	DG	0.505936	-		1:CG	2:DG	+	0.001	*0.999	yes
ENSG00000106049	CGmito(495)	CG	2.15738	0.391942	0.936641	*	DG	0.608058	-		1:CG	2:DG	+	0.007	*0.993	yes
ENSG00000106268	CGmito(495)	CG	1.80887	0.448403	0.802064	*	DG	0.551597	-		1:CG	2:DG	+	0.007	*0.993	yes
ENSG00000106554	CGmito(495)	CG	1.44875	0.478167	0.737796	*	DG	0.521833	-		1:CG	2:DG	+	0.001	*0.999	yes
ENSG00000107959	CGmito(495)	CG	1.26362	0.455342	0.786708	*	DG	0.544659	-		1:CG	2:DG	+	0.001	*0.999	yes
ENSG00000108010	CGmito(495)	CG	1.55328	0.477435	0.739326	*	DG	0.522565	-		1:CG	2:DG	+	0.001	*0.999	yes
ENSG00000108528	CGmito(495)	CG	1.50985	0.492285	0.708697	*	DG	0.507715	-		1:CG	2:DG	+	0.001	*0.999	yes
ENSG00000108958	CGmito(495)	CG	0.905485	0.426124	0.853025	*	DG	0.573876	-		1:CG	2:DG	+	0.007	*0.993	yes
ENSG00000110871	CGmito(495)	CG	1.55192	0.497907	0.697343	*	DG	0.502093	-		1:CG	2:DG	+	0.001	*0.999	yes
ENSG00000112474	CGmito(495)	CG	3.26327	0.369658	0.995178	*	DG	0.630342	-		1:CG	2:DG	+	0.001	*0.999	yes
ENSG00000113492	CGmito(495)	CG	1.30964	0.458207	0.780434	*	DG	0.541793	-		1:CG	2:DG	+	0.001	*0.999	yes
ENSG00000114120	CGmito(495)	CG	1.4373	0.49901	0.695128	*	DG	0.50099	-		1:CG	2:DG	+	0.001	*0.999	yes
ENSG00000114383	CGmito(495)	CG	1.53049	0.4895	0.714371	*	DG	0.5105	-		1:CG	2:DG	+	0.001	*0.999	yes
ENSG00000115129	CGmito(495)	CG	1.12924	0.438898	0.823489	*	DG	0.561102	-		1:CG	2:DG	+	0.001	*0.999	yes
ENSG00000115419	CGmito(495)	CG	1.52132	0.393788	0.931942	*	DG	0.606212	-		1:CG	2:DG	+	0.001	*0.999	yes
ENSG00000115425	CGmito(495)	CG	1.62229	0.405116	0.903581	*	DG	0.594884	-		1:CG	2:DG	+	0.001	*0.999	yes
ENSG00000116353	CGmito(495)	CG	5.02864	0.290573	1.2359	*	DG	0.709427	-		1:CG	2:DG	+	0.247	*0.753	yes
ENSG00000116771	CGmito(495)	CG	0.956523	0.460829	0.774729	*	DG	0.539171	-		1:CG	2:DG	+	0.001	*0.999	yes
ENSG00000116882	CGmito(495)	CG	1.01858	0.455353	0.786682	*	DG	0.544647	-		1:CG	2:DG	+	0.001	*0.999	yes
ENSG00000117009	CGmito(495)	CG	1.27688	0.489301	0.714778	*	DG	0.510699	-		1:CG	2:DG	+	0.001	*0.999	yes
ENSG00000117450	CGmito(495)	CG	0.784256	0.497067	0.699031	*	DG	0.502933	-		1:CG	2:DG	+	0.039	*0.961	yes
ENSG00000119431	CGmito(495)	CG	1.45942	0.480964	0.731964	*	DG	0.519036	-		1:CG	2:DG	+	0.001	*0.999	yes
ENSG00000119673	CGmito(495)	CG	1.37378	0.469554	0.755972	*	DG	0.530446	-		1:CG	2:DG	+	0.001	*0.999	yes
ENSG00000119723	CGmito(495)	CG	1.15705	0.465177	0.765337	*	DG	0.534823	-		1:CG	2:DG	+	0.001	*0.999	yes
ENSG00000119927	CGmito(495)	CG	1.40918	0.472416	0.749895	*	DG	0.527584	-		1:CG	2:DG	+	0.001	*0.999	yes
ENSG00000120329	CGmito(495)	CG	0.83751	0.467132	0.761144	*	DG	0.532868	-		1:CG	2:DG	+	0.001	*0.999	yes
ENSG00000123130	CGmito(495)	CG	1.26341	0.477938	0.738274	*	DG	0.522062	-		1:CG	2:DG	+	0.001	*0.999	yes
ENSG00000123453	CGmito(495)	CG	1.84982	0.372201	0.988321	*	DG	0.627799	-		1:CG	2:DG	+	0.001	*0.999	yes
ENSG00000126432	CGmito(495)	CG	0.672987	0.476346	0.741611	*	DG	0.523654	-		1:CG	2:DG	+	0.001	*0.999	yes
ENSG00000127838	CGmito(495)	CG	1.15925	0.481222	0.731427	*	DG	0.518778	-		1:CG	2:DG	+	0.001	*0.999	yes
ENSG00000128309	CGmito(495)	CG	1.38053	0.388929	0.944358	*	DG	0.611071	-		1:CG	2:DG	+	0.001	*0.999	yes
ENSG00000128311	CGmito(495)	CG	1.33937	0.417713	0.872961	*	DG	0.582287	-		1:CG	2:DG	+	0.001	*0.999	yes
ENSG00000128654	CGmito(495)	CG	1.44466	0.49499	0.703217	*	DG	0.50501	-		1:CG	2:DG	+	0.001	*0.999	yes
ENSG00000130876	CGmito(495)	CG	0.907809	0.460104	0.776303	*	DG	0.539896	-		1:CG	2:DG	+	0.001	*0.999	yes
ENSG00000131055	CGmito(495)	CG	1.36395	0.482545	0.72868	*	DG	0.517455	-		1:CG	2:DG	+	0.001	*0.999	yes
ENSG00000131495	CGmito(495)	CG	1.85566	0.481458	0.730936	*	DG	0.518542	-		1:CG	2:DG	+	0.007	*0.993	yes
ENSG00000131730	CGmito(495)	CG	1.28833	0.470118	0.75477	*	DG	0.529882	-		1:CG	2:DG	+	0.001	*0.999	yes
ENSG00000131748	CGmito(495)	CG	2.49803	0.383529	0.95834	*	DG	0.616471	-		1:CG	2:DG	+	0.001	*0.999	yes
ENSG00000132305	CGmito(495)	CG	1.26438	0.499253	0.694642	*	DG	0.500747	-		1:CG	2:DG	+	0.007	*0.993	yes
ENSG00000132394	CGmito(495)	CG	1.20094	0.486798	0.719906	*	DG	0.513202	-		1:CG	2:DG	+	0.001	*0.999	yes
ENSG00000135297	CGmito(495)	CG	0.837121	0.420722	0.865783	*	DG	0.579278	-		1:CG	2:DG	+	0.007	*0.993	yes
ENSG00000135423	CGmito(495)	CG	1.08977	0.451165	0.795922	*	DG	0.548835	-		1:CG	2:DG	+	0.001	*0.999	yes
ENSG00000136003	CGmito(495)	CG	1.30678	0.427318	0.850227	*	DG	0.572682	-		1:CG	2:DG	+	0.001	*0.999	yes
ENSG00000136371	CGmito(495)	CG	1.78871	0.490215	0.71291	*	DG	0.509785	-		1:CG	2:DG	+	0.007	*0.993	yes
ENSG00000136444	CGmito(495)	CG	1.2965	0.380719	0.965693	*	DG	0.619281	-		1:CG	2:DG	+	0.001	*0.999	yes
ENSG00000137124	CGmito(495)	CG	2.4614	0.444438	0.810945	*	DG	0.555562	-		1:CG	2:DG	+	0.001	*0.999	yes
ENSG00000137714	CGmito(495)	CG	1.31175	0.497404	0.698352	*	DG	0.502596	-		1:CG	2:DG	+	0.001	*0.999	yes
ENSG00000139514	CGmito(495)	CG	1.00258	0.456938	0.783207	*	DG	0.543062	-		1:CG	2:DG	+	0.001	*0.999	yes
ENSG00000141378	CGmito(495)	CG	1.34075	0.48549	0.722597	*	DG	0.51451	-		1:CG	2:DG	+	0.001	*0.999	yes
ENSG00000141682	CGmito(495)	CG	2.36457	0.456137	0.784962	*	DG	0.543863	-		1:CG	2:DG	+	0.001	*0.999	yes
ENSG00000144182	CGmito(495)	CG	1.09971	0.456478	0.784215	*	DG	0.543522	-		1:CG	2:DG	+	0.001	*0.999	yes
ENSG00000144908	CGmito(495)	CG	0.914899	0.449765	0.799031	*	DG	0.550235	-		1:CG	2:DG	+	0.001	*0.999	yes
ENSG00000145439	CGmito(495)	CG	0.969137	0.444835	0.810053	*	DG	0.555165	-		1:CG	2:DG	+	0.001	*0.999	yes
ENSG00000146729	CGmito(495)	CG	1.12198	0.452578	0.792795	*	DG	0.547422	-		1:CG	2:DG	+	0.001	*0.999	yes
ENSG00000147123	CGmito(495)	CG	2.08825	0.494229	0.704756	*	DG	0.505771	-		1:CG	2:DG	+	0.007	*0.993	yes
ENSG00000147576	CGmito(495)	CG	1.14507	0.446615	0.806057	*	DG	0.553385	-		1:CG	2:DG	+	0.001	*0.999	yes
ENSG00000148334	CGmito(495)	CG	1.37668	0.477941	0.738267	*	DG	0.522059	-		1:CG	2:DG	+	0.001	*0.999	yes
ENSG00000148450	CGmito(495)	CG	1.2562	0.480799	0.732305	*	DG	0.519201	-		1:CG	2:DG	+	0.001	*0.999	yes
ENSG00000148950	CGmito(495)	CG	1.35299	0.472356	0.750023	*	DG	0.527644	-		1:CG	2:DG	+	0.001	*0.999	yes
ENSG00000149124	CGmito(495)	CG	1.32969	0.473733	0.747111	*	DG	0.526267	-		1:CG	2:DG	+	0.001	*0.999	yes
ENSG00000151093	CGmito(495)	CG	1.33097	0.434357	0.833887	*	DG	0.565643	-		1:CG	2:DG	+	0.001	*0.999	yes
ENSG00000151376	CGmito(495)	CG	0.90785	0.411424	0.88813	*	DG	0.588576	-		1:CG	2:DG	+	0.001	*0.999	yes
ENSG00000151806	CGmito(495)	CG	1.24278	0.451	0.796288	*	DG	0.549	-		1:CG	2:DG	+	0.001	*0.999	yes
ENSG00000152782	CGmito(495)	CG	1.3516	0.477573	0.739039	*	DG	0.522427	-		1:CG	2:DG	+	0.001	*0.999	yes
ENSG00000153904	CGmito(495)	CG	1.44066	0.386655	0.950221	*	DG	0.613345	-		1:CG	2:DG	+	0.001	*0.999	yes
ENSG00000154930	CGmito(495)	CG	1.43434	0.37589	0.978459	*	DG	0.62411	-		1:CG	2:DG	+	0.001	*0.999	yes
ENSG00000155463	CGmito(495)	CG	0.985762	0.477928	0.738296	*	DG	0.522072	-		1:CG	2:DG	+	0.007	*0.993	yes
ENSG00000156885	CGmito(495)	CG	1.38351	0.483766	0.726155	*	DG	0.516234	-		1:CG	2:DG	+	0.001	*0.999	yes
ENSG00000157379	CGmito(495)	CG	0.891779	0.425742	0.853923	*	DG	0.574258	-		1:CG	2:DG	+	0.007	*0.993	yes
ENSG00000160221	CGmito(495)	CG	1.33846	0.492258	0.708753	*	DG	0.507742	-		1:CG	2:DG	+	0.001	*0.999	yes
ENSG00000161267	CGmito(495)	CG	1.34352	0.365627	1.00614	*	DG	0.634373	-		1:CG	2:DG	+	0.007	*0.993	yes
ENSG00000161513	CGmito(495)	CG	1.34228	0.425474	0.854551	*	DG	0.574526	-		1:CG	2:DG	+	0.001	*0.999	yes
ENSG00000162877	CGmito(495)	CG	1.20822	0.457103	0.782846	*	DG	0.542897	-		1:CG	2:DG	+	0.001	*0.999	yes
ENSG00000163626	CGmito(495)	CG	1.35241	0.490135	0.713074	*	DG	0.509865	-		1:CG	2:DG	+	0.001	*0.999	yes
ENSG00000164347	CGmito(495)	CG	1.23564	0.476502	0.741283	*	DG	0.523498	-		1:CG	2:DG	+	0.001	*0.999	yes
ENSG00000164893	CGmito(495)	CG	0.907809	0.460104	0.776303	*	DG	0.539896	-		1:CG	2:DG	+	0.001	*0.999	yes
ENSG00000164933	CGmito(495)	CG	1.40271	0.461991	0.772209	*	DG	0.538009	-		1:CG	2:DG	+	0.001	*0.999	yes
ENSG00000165349	CGmito(495)	CG	0.94912	0.459383	0.777871	*	DG	0.540617	-		1:CG	2:DG	+	0.001	*0.999	yes
ENSG00000166123	CGmito(495)	CG	1.23666	0.439594	0.821904	*	DG	0.560406	-		1:CG	2:DG	+	0.001	*0.999	yes
ENSG00000166562	CGmito(495)	CG	1.35012	0.474141	0.746251	*	DG	0.525859	-		1:CG	2:DG	+	0.001	*0.999	yes
ENSG00000166743	CGmito(495)	CG	1.4748	0.436915	0.828017	*	DG	0.563085	-		1:CG	2:DG	+	0.001	*0.999	yes
ENSG00000167315	CGmito(495)	CG	2.15833	0.350064	1.04964	*	DG	0.649936	-		1:CG	2:DG	+	0.007	*0.993	yes
ENSG00000167701	CGmito(495)	CG	2.0037	0.384885	0.954811	*	DG	0.615115	-		1:CG	2:DG	+	0.001	*0.999	yes
ENSG00000167720	CGmito(495)	CG	1.99736	0.396481	0.925126	*	DG	0.603519	-		1:CG	2:DG	+	0.001	*0.999	yes
ENSG00000167969	CGmito(495)	CG	1.11615	0.450151	0.798172	*	DG	0.549849	-		1:CG	2:DG	+	0.001	*0.999	yes
ENSG00000167985	CGmito(495)	CG	1.33547	0.465166	0.765361	*	DG	0.534834	-		1:CG	2:DG	+	0.001	*0.999	yes
ENSG00000168457	CGmito(495)	CG	3.30408	0.3525	1.0427	*	DG	0.6475	-		1:CG	2:DG	+	0.001	*0.999	yes
ENSG00000169093	CGmito(495)	CG	1.06394	0.416406	0.876096	*	DG	0.583594	-		1:CG	2:DG	+	0.001	*0.999	yes
ENSG00000169169	CGmito(495)	CG	1.12866	0.432102	0.839093	*	DG	0.567898	-		1:CG	2:DG	+	0.001	*0.999	yes
ENSG00000170095	CGmito(495)	CG	1.19646	0.469217	0.75669	*	DG	0.530783	-		1:CG	2:DG	+	0.001	*0.999	yes
ENSG00000171109	CGmito(495)	CG	1.33874	0.465484	0.764677	*	DG	0.534516	-		1:CG	2:DG	+	0.001	*0.999	yes
ENSG00000171552	CGmito(495)	CG	2.04058	0.468569	0.758072	*	DG	0.531431	-		1:CG	2:DG	+	0.001	*0.999	yes
ENSG00000171989	CGmito(495)	CG	0.912869	0.413358	0.883441	*	DG	0.586642	-		1:CG	2:DG	+	0.007	*0.993	yes
ENSG00000172115	CGmito(495)	CG	1.63498	0.478877	0.736312	*	DG	0.521123	-		1:CG	2:DG	+	0.007	*0.993	yes
ENSG00000172345	CGmito(495)	CG	1.90629	0.417212	0.874161	*	DG	0.582788	-		1:CG	2:DG	+	0.001	*0.999	yes
ENSG00000175511	CGmito(495)	CG	2.91246	0.400441	0.915188	*	DG	0.599559	-		1:CG	2:DG	+	0.001	*0.999	yes
ENSG00000175806	CGmito(495)	CG	0.955997	0.423606	0.858952	*	DG	0.576394	-		1:CG	2:DG	+	0.001	*0.999	yes
ENSG00000176134	CGmito(495)	CG	1.10007	0.454088	0.789465	*	DG	0.545912	-		1:CG	2:DG	+	0.001	*0.999	yes
ENSG00000176171	CGmito(495)	CG	1.56304	0.494376	0.704459	*	DG	0.505624	-		1:CG	2:DG	+	0.001	*0.999	yes
ENSG00000176715	CGmito(495)	CG	1.07616	0.441524	0.817522	*	DG	0.558476	-		1:CG	2:DG	+	0.001	*0.999	yes
ENSG00000176974	CGmito(495)	CG	1.52273	0.361022	1.01882	*	DG	0.638978	-		1:CG	2:DG	+	0.007	*0.993	yes
ENSG00000177646	CGmito(495)	CG	1.40375	0.480948	0.731996	*	DG	0.519052	-		1:CG	2:DG	+	0.001	*0.999	yes
ENSG00000181867	CGmito(495)	CG	1.68937	0.39508	0.928667	*	DG	0.60492	-		1:CG	2:DG	+	0.001	*0.999	yes
ENSG00000181873	CGmito(495)	CG	1.61219	0.414411	0.880896	*	DG	0.585589	-		1:CG	2:DG	+	0.001	*0.999	yes
ENSG00000182021	CGmito(495)	CG	1.10007	0.454088	0.789465	*	DG	0.545912	-		1:CG	2:DG	+	0.001	*0.999	yes
ENSG00000182890	CGmito(495)	CG	3.3551	0.330897	1.10595	*	DG	0.669103	-		1:CG	2:DG	+	0.007	*0.993	yes
ENSG00000183048	CGmito(495)	CG	1.07825	0.471956	0.75087	*	DG	0.528044	-		1:CG	2:DG	+	0.001	*0.999	yes
ENSG00000184047	CGmito(495)	CG	1.19699	0.476004	0.74233	*	DG	0.523996	-		1:CG	2:DG	+	0.247	*0.753	yes
ENSG00000184254	CGmito(495)	CG	3.0858	0.432348	0.838524	*	DG	0.567652	-		1:CG	2:DG	+	0.001	*0.999	yes
ENSG00000184903	CGmito(495)	CG	1.36184	0.471294	0.752273	*	DG	0.528706	-		1:CG	2:DG	+	0.001	*0.999	yes
ENSG00000184906	CGmito(495)	CG	1.10007	0.454088	0.789465	*	DG	0.545912	-		1:CG	2:DG	+	0.001	*0.999	yes
ENSG00000185633	CGmito(495)	CG	1.35205	0.484131	0.725399	*	DG	0.515869	-		1:CG	2:DG	+	0.007	*0.993	yes
ENSG00000185875	CGmito(495)	CG	1.21165	0.447465	0.804157	*	DG	0.552535	-		1:CG	2:DG	+	0.007	*0.993	yes
ENSG00000185973	CGmito(495)	CG	1.11848	0.489845	0.713666	*	DG	0.510155	-		1:CG	2:DG	+	0.001	*0.999	yes
ENSG00000185984	CGmito(495)	CG	0.936366	0.452021	0.794026	*	DG	0.547979	-		1:CG	2:DG	+	0.001	*0.999	yes
ENSG00000187134	CGmito(495)	CG	1.22631	0.445605	0.808321	*	DG	0.554395	-		1:CG	2:DG	+	0.001	*0.999	yes
ENSG00000187197	CGmito(495)	CG	1.33431	0.45535	0.786688	*	DG	0.54465	-		1:CG	2:DG	+	0.001	*0.999	yes
ENSG00000196475	CGmito(495)	CG	1.26233	0.48645	0.720621	*	DG	0.51355	-		1:CG	2:DG	+	0.001	*0.999	yes
ENSG00000197017	CGmito(495)	CG	0.907809	0.460104	0.776303	*	DG	0.539896	-		1:CG	2:DG	+	0.001	*0.999	yes
ENSG00000197142	CGmito(495)	CG	0.807573	0.449559	0.799488	*	DG	0.550441	-		1:CG	2:DG	+	0.001	*0.999	yes
ENSG00000197444	CGmito(495)	CG	1.44005	0.392377	0.935531	*	DG	0.607623	-		1:CG	2:DG	+	0.007	*0.993	yes
ENSG00000197448	CGmito(495)	CG	1.54878	0.487613	0.718233	*	DG	0.512387	-		1:CG	2:DG	+	0.001	*0.999	yes
ENSG00000197711	CGmito(495)	CG	1.47848	0.438086	0.82534	*	DG	0.561914	-		1:CG	2:DG	+	0.001	*0.999	yes
ENSG00000197763	CGmito(495)	CG	1.42634	0.471819	0.751159	*	DG	0.528181	-		1:CG	2:DG	+	0.001	*0.999	yes
ENSG00000004779	CGmito(495)	CG	6.32516	0.473234	0.748165	*	DG	0.526766	-	1	1:CG	1:CG		*0.916	0.084
ENSG00000005882	CGmito(495)	CG	2.33924	0.367284	1.00162	*	DG	0.632716	-	1	1:CG	1:CG		*0.916	0.084
ENSG00000053371	CGmito(495)	CG	1.08872	0.434836	0.832785	*	DG	0.565164	-	1	1:CG	1:CG		*0.66	0.34
ENSG00000060982	CGmito(495)	CG	1.63489	0.4782	0.737726	*	DG	0.5218	-	1	1:CG	1:CG		*0.916	0.084
ENSG00000062485	CGmito(495)	CG	2.43295	0.386329	0.951065	*	DG	0.613671	-	1	1:CG	1:CG		*0.66	0.34
ENSG00000065057	CGmito(495)	CG	2.86917	0.344699	1.06508	*	DG	0.655301	-	1	1:CG	1:CG		*0.649	0.351
ENSG00000067992	CGmito(495)	CG	1.2158	0.398482	0.920094	*	DG	0.601518	-	1	1:CG	1:CG		*0.649	0.351
ENSG00000076555	CGmito(495)	CG	0.828555	0.436048	0.830002	*	DG	0.563952	-	1	1:CG	1:CG		*0.916	0.084
ENSG00000099795	CGmito(495)	CG	5.9332	0.430253	0.843382	*	DG	0.569747	-	1	1:CG	1:CG		*0.916	0.084
ENSG00000100348	CGmito(495)	CG	1.33734	0.379164	0.969787	*	DG	0.620836	-	1	1:CG	1:CG		*0.66	0.34
ENSG00000100412	CGmito(495)	CG	1.77108	0.367798	1.00022	*	DG	0.632202	-	1	1:CG	1:CG		*0.916	0.084
ENSG00000102967	CGmito(495)	CG	2.7715	0.336925	1.0879	*	DG	0.663075	-	1	1:CG	1:CG		*0.916	0.084
ENSG00000104823	CGmito(495)	CG	4.66276	0.30929	1.17347	*	DG	0.69071	-	1	1:CG	1:CG		*0.916	0.084
ENSG00000105220	CGmito(495)	CG	4.29235	0.310877	1.16836	*	DG	0.689123	-	1	1:CG	1:CG		*0.916	0.084
ENSG00000105552	CGmito(495)	CG	0.886939	0.433736	0.83532	*	DG	0.566264	-	1	1:CG	1:CG		*0.916	0.084
ENSG00000112972	CGmito(495)	CG	2.16673	0.388795	0.944703	*	DG	0.611205	-	1	1:CG	1:CG		*0.916	0.084
ENSG00000120053	CGmito(495)	CG	6.16677	0.276198	1.28664	*	DG	0.723802	-	1	1:CG	1:CG		*0.916	0.084
ENSG00000120254	CGmito(495)	CG	5.71267	0.337224	1.08701	*	DG	0.662776	-	1	1:CG	1:CG		*0.916	0.084
ENSG00000121897	CGmito(495)	CG	2.42637	0.355202	1.03507	*	DG	0.644798	-	1	1:CG	1:CG		*0.916	0.084
ENSG00000123983	CGmito(495)	CG	2.53278	0.391939	0.936648	*	DG	0.608061	-	1	1:CG	1:CG		*0.916	0.084
ENSG00000125166	CGmito(495)	CG	6.13191	0.310914	1.16824	*	DG	0.689086	-	1	1:CG	1:CG		*0.916	0.084
ENSG00000127540	CGmito(495)	CG	4.63102	0.438334	0.824775	*	DG	0.561666	-	1	1:CG	1:CG		*0.916	0.084
ENSG00000127884	CGmito(495)	CG	4.64683	0.303244	1.19322	*	DG	0.696756	-	1	1:CG	1:CG		*0.916	0.084
ENSG00000128609	CGmito(495)	CG	4.48433	0.433208	0.836537	*	DG	0.566792	-	1	1:CG	1:CG		*0.66	0.34
ENSG00000131143	CGmito(495)	CG	5.50608	0.430502	0.842803	*	DG	0.569498	-	1	1:CG	1:CG		*0.916	0.084
ENSG00000135094	CGmito(495)	CG	3.03959	0.383239	0.959095	*	DG	0.616761	-	1	1:CG	1:CG		*0.66	0.34
ENSG00000135390	CGmito(495)	CG	2.39268	0.455649	0.786033	*	DG	0.544351	-	1	1:CG	1:CG		*0.66	0.34
ENSG00000136810	CGmito(495)	CG	2.73974	0.357437	1.0288	*	DG	0.642563	-	1	1:CG	1:CG		*0.916	0.084
ENSG00000136877	CGmito(495)	CG	3.16	0.432449	0.838292	*	DG	0.567551	-	1	1:CG	1:CG		*0.916	0.084
ENSG00000138413	CGmito(495)	CG	4.86084	0.317927	1.14593	*	DG	0.682073	-	1	1:CG	1:CG		*0.66	0.34
ENSG00000148834	CGmito(495)	CG	2.32232	0.402464	0.910149	*	DG	0.597536	-	1	1:CG	1:CG		*0.66	0.34
ENSG00000151366	CGmito(495)	CG	5.16012	0.492538	0.708184	*	DG	0.507462	-	1	1:CG	1:CG		*0.66	0.34
ENSG00000151726	CGmito(495)	CG	0.620976	0.444924	0.809853	*	DG	0.555076	-	1	1:CG	1:CG		*0.916	0.084
ENSG00000159131	CGmito(495)	CG	1.76727	0.445771	0.80795	*	DG	0.554229	-	1	1:CG	1:CG		*0.916	0.084
ENSG00000163114	CGmito(495)	CG	1.86621	0.389214	0.943625	*	DG	0.610786	-	1	1:CG	1:CG		*0.916	0.084
ENSG00000166260	CGmito(495)	CG	1.14993	0.461838	0.772541	*	DG	0.538162	-	1	1:CG	1:CG		*0.66	0.34
ENSG00000166816	CGmito(495)	CG	0.691033	0.497396	0.698369	*	DG	0.502604	-	1	1:CG	1:CG		*0.66	0.34
ENSG00000167186	CGmito(495)	CG	3.12683	0.355959	1.03294	*	DG	0.644041	-	1	1:CG	1:CG		*0.916	0.084
ENSG00000167815	CGmito(495)	CG	1.60863	0.417252	0.874065	*	DG	0.582748	-	1	1:CG	1:CG		*0.916	0.084
ENSG00000169738	CGmito(495)	CG	1.97755	0.38458	0.955602	*	DG	0.61542	-	1	1:CG	1:CG		*0.916	0.084
ENSG00000172340	CGmito(495)	CG	1.71504	0.377672	0.973728	*	DG	0.622328	-	1	1:CG	1:CG		*0.916	0.084
ENSG00000179360	CGmito(495)	CG	2.41503	0.454573	0.788396	*	DG	0.545427	-	1	1:CG	1:CG		*0.66	0.34
ENSG00000180389	CGmito(495)	CG	2.41503	0.454573	0.788396	*	DG	0.545427	-	1	1:CG	1:CG		*0.66	0.34
ENSG00000181192	CGmito(495)	CG	2.36158	0.370639	0.992527	*	DG	0.629361	-	1	1:CG	1:CG		*0.66	0.34
ENSG00000182054	CGmito(495)	CG	2.96898	0.344033	1.06702	*	DG	0.655967	-	1	1:CG	1:CG		*0.66	0.34
ENSG00000182199	CGmito(495)	CG	0.808691	0.415917	0.877269	*	DG	0.584083	-	1	1:CG	1:CG		*0.916	0.084
ENSG00000182404	CGmito(495)	CG	1.45539	0.422783	0.860896	*	DG	0.577217	-	1	1:CG	1:CG		*0.66	0.34
ENSG00000184076	CGmito(495)	CG	5.51779	0.498916	0.695318	*	DG	0.501084	-	1	1:CG	1:CG		*0.66	0.34
ENSG00000184983	CGmito(495)	CG	4.73269	0.421495	0.863948	*	DG	0.578505	-	1	1:CG	1:CG		*0.916	0.084
ENSG00000010256	CGmito(495)	CG	10.6328	0.456342	0.784512	*	DG	0.543658	-		1:CG	1:CG		*0.916	0.084
ENSG00000014641	CGmito(495)	CG	9.42552	0.299664	1.20509	*	DG	0.700336	-		1:CG	1:CG		*0.916	0.084
ENSG00000065911	CGmito(495)	CG	4.99495	0.362747	1.01405	*	DG	0.637253	-		1:CG	1:CG		*0.916	0.084
ENSG00000067829	CGmito(495)	CG	6.79653	0.401868	0.911632	*	DG	0.598132	-		1:CG	1:CG		*0.916	0.084
ENSG00000099624	CGmito(495)	CG	4.03501	0.48269	0.72838	*	DG	0.51731	-		1:CG	1:CG		*0.916	0.084
ENSG00000100141	CGmito(495)	CG	1.98394	0.462699	0.770678	*	DG	0.537301	-		1:CG	1:CG		*0.649	0.351
ENSG00000101365	CGmito(495)	CG	6.16326	0.342076	1.07272	*	DG	0.657924	-		1:CG	1:CG		*0.916	0.084
ENSG00000109390	CGmito(495)	CG	6.42483	0.456545	0.784069	*	DG	0.543455	-		1:CG	1:CG		*0.916	0.084
ENSG00000111775	CGmito(495)	CG	6.8284	0.414042	0.881787	*	DG	0.585958	-		1:CG	1:CG		*0.916	0.084
ENSG00000112695	CGmito(495)	CG	6.27993	0.485202	0.72319	*	DG	0.514798	-		1:CG	1:CG		*0.916	0.084
ENSG00000115944	CGmito(495)	CG	4.81013	0.456267	0.784677	*	DG	0.543733	-		1:CG	1:CG		*0.916	0.084
ENSG00000117592	CGmito(495)	CG	5.81056	0.381004	0.964945	*	DG	0.618996	-		1:CG	1:CG		*0.916	0.084
ENSG00000126267	CGmito(495)	CG	7.24709	0.483591	0.726516	*	DG	0.516409	-		1:CG	1:CG		*0.916	0.084
ENSG00000127184	CGmito(495)	CG	5.45054	0.488495	0.716427	*	DG	0.511505	-		1:CG	1:CG		*0.916	0.084
ENSG00000131174	CGmito(495)	CG	7.31558	0.447983	0.803001	*	DG	0.552017	-		1:CG	1:CG		*0.916	0.084
ENSG00000131473	CGmito(495)	CG	6.30545	0.416777	0.875205	*	DG	0.583223	-		1:CG	1:CG		*0.916	0.084
ENSG00000135940	CGmito(495)	CG	8.57766	0.367232	1.00176	*	DG	0.632768	-		1:CG	1:CG		*0.916	0.084
ENSG00000136521	CGmito(495)	CG	8.46016	0.461157	0.774017	*	DG	0.538843	-		1:CG	1:CG		*0.916	0.084
ENSG00000138495	CGmito(495)	CG	3.26445	0.436305	0.829415	*	DG	0.563695	-		1:CG	1:CG		*0.916	0.084
ENSG00000139180	CGmito(495)	CG	4.17617	0.486307	0.720915	*	DG	0.513693	-		1:CG	1:CG		*0.916	0.084
ENSG00000144559	CGmito(495)	CG	112.096	0.396584	0.924868	*	DG	0.603416	-		1:CG	1:CG		*0.649	0.351
ENSG00000146701	CGmito(495)	CG	11.3684	0.305177	1.18686	*	DG	0.694823	-		1:CG	1:CG		*0.916	0.084
ENSG00000151498	CGmito(495)	CG	4.46247	0.440382	0.820112	*	DG	0.559618	-		1:CG	1:CG		*0.916	0.084
ENSG00000152256	CGmito(495)	CG	2.5048	0.387717	0.947479	*	DG	0.612283	-		1:CG	1:CG		*0.916	0.084
ENSG00000156709	CGmito(495)	CG	5.75469	0.258592	1.3525	*	DG	0.741408	-		1:CG	1:CG		*0.916	0.084
ENSG00000163655	CGmito(495)	CG	17.0592	0.454798	0.787903	*	DG	0.545202	-		1:CG	1:CG		*0.916	0.084
ENSG00000164919	CGmito(495)	CG	8.6313	0.456265	0.784682	*	DG	0.543735	-		1:CG	1:CG		*0.916	0.084
ENSG00000165672	CGmito(495)	CG	5.21075	0.428989	0.846323	*	DG	0.571011	-		1:CG	1:CG		*0.916	0.084
ENSG00000166136	CGmito(495)	CG	7.52644	0.481117	0.731644	*	DG	0.518883	-		1:CG	1:CG		*0.916	0.084
ENSG00000166411	CGmito(495)	CG	5.07402	0.320783	1.13699	*	DG	0.679217	-		1:CG	1:CG		*0.916	0.084
ENSG00000167468	CGmito(495)	CG	8.99373	0.373771	0.984112	*	DG	0.626229	-		1:CG	1:CG		*0.916	0.084
ENSG00000167774	CGmito(495)	CG	5.22978	0.489644	0.714078	*	DG	0.510356	-		1:CG	1:CG		*0.916	0.084
ENSG00000169021	CGmito(495)	CG	11.6062	0.393751	0.932036	*	DG	0.606249	-		1:CG	1:CG		*0.916	0.084
ENSG00000169710	CGmito(495)	CG	16.6367	0.203444	1.59236	*	DG	0.796556	-		1:CG	1:CG		*0.916	0.084
ENSG00000173660	CGmito(495)	CG	8.17118	0.452109	0.793831	*	DG	0.547891	-		1:CG	1:CG		*0.916	0.084
ENSG00000176340	CGmito(495)	CG	8.05348	0.470409	0.754154	*	DG	0.529591	-		1:CG	1:CG		*0.916	0.084
ENSG00000186298	CGmito(495)	CG	4.05091	0.458969	0.778773	*	DG	0.541031	-		1:CG	1:CG		*0.916	0.084
ENSG00000125375	CGmito(495)	CG	1.07813	0.526712	0.6411		CG	0.526712	-	1	1:CG	2:DG	+	0.247	*0.753
ENSG00000033050	CGmito(495)	CG	0.874255	0.504195	0.684791		CG	0.504195	-		1:CG	2:DG	+	0.001	*0.999
ENSG00000084090	CGmito(495)	CG	1.69302	0.508197	0.676887		CG	0.508197	-		1:CG	2:DG	+	0.001	*0.999
ENSG00000087470	CGmito(495)	CG	1.03425	0.518049	0.657686		CG	0.518049	-		1:CG	2:DG	+	0.007	*0.993
ENSG00000099800	CGmito(495)	CG	2.12459	0.508599	0.676096		CG	0.508599	-		1:CG	2:DG	+	0.001	*0.999
ENSG00000100209	CGmito(495)	CG	1.16511	0.52157	0.650911		CG	0.52157	-		1:CG	2:DG	+	0.001	*0.999
ENSG00000100300	CGmito(495)	CG	1.51193	0.504175	0.684831		CG	0.504175	-		1:CG	2:DG	+	0.001	*0.999
ENSG00000103356	CGmito(495)	CG	4.20358	0.58166	0.541868		CG	0.58166	-		1:CG	2:DG	+	0.039	*0.961
ENSG00000104835	CGmito(495)	CG	3.8894	0.590564	0.526677		CG	0.590564	-		1:CG	2:DG	+	0.039	*0.961
ENSG00000104980	CGmito(495)	CG	1.95464	0.528667	0.637396		CG	0.528667	-		1:CG	2:DG	+	0.001	*0.999
ENSG00000106153	CGmito(495)	CG	1.14338	0.526796	0.640941		CG	0.526796	-		1:CG	2:DG	+	0.001	*0.999
ENSG00000109238	CGmito(495)	CG	2.20605	0.507974	0.677325		CG	0.507974	-		1:CG	2:DG	+	0.007	*0.993
ENSG00000116874	CGmito(495)	CG	2.04878	0.553246	0.591952		CG	0.553246	-		1:CG	2:DG	+	0.039	*0.961
ENSG00000117593	CGmito(495)	CG	2.96632	0.575498	0.552519		CG	0.575498	-		1:CG	2:DG	+	0.039	*0.961
ENSG00000124608	CGmito(495)	CG	2.82487	0.574789	0.553752		CG	0.574789	-		1:CG	2:DG	+	0.039	*0.961
ENSG00000126768	CGmito(495)	CG	1.69264	0.50547	0.682267		CG	0.50547	-		1:CG	2:DG	+	0.001	*0.999
ENSG00000130204	CGmito(495)	CG	0.499185	0.525781	0.642871		CG	0.525781	-		1:CG	2:DG	+	0.039	*0.961
ENSG00000130997	CGmito(495)	CG	1.17515	0.506729	0.679778		CG	0.506729	-		1:CG	2:DG	+	0.001	*0.999
ENSG00000132286	CGmito(495)	CG	1.86746	0.524471	0.645366		CG	0.524471	-		1:CG	2:DG	+	0.001	*0.999
ENSG00000134375	CGmito(495)	CG	1.30478	0.506501	0.68023		CG	0.506501	-		1:CG	2:DG	+	0.001	*0.999
ENSG00000134809	CGmito(495)	CG	1.83612	0.518805	0.656227		CG	0.518805	-		1:CG	2:DG	+	0.001	*0.999
ENSG00000138297	CGmito(495)	CG	1.80192	0.514791	0.663994		CG	0.514791	-		1:CG	2:DG	+	0.001	*0.999
ENSG00000146282	CGmito(495)	CG	2.19701	0.549675	0.598428		CG	0.549675	-		1:CG	2:DG	+	0.039	*0.961
ENSG00000147853	CGmito(495)	CG	1.7951	0.524681	0.644964		CG	0.524681	-		1:CG	2:DG	+	0.007	*0.993
ENSG00000150779	CGmito(495)	CG	1.76154	0.504519	0.684151		CG	0.504519	-		1:CG	2:DG	+	0.001	*0.999
ENSG00000152428	CGmito(495)	CG	2.30952	0.567241	0.566971		CG	0.567241	-		1:CG	2:DG	+	0.039	*0.961
ENSG00000156411	CGmito(495)	CG	2.03284	0.579363	0.545826		CG	0.579363	-		1:CG	2:DG	+	0.007	*0.993
ENSG00000157312	CGmito(495)	CG	0.76804	0.505897	0.681423		CG	0.505897	-		1:CG	2:DG	+	0.001	*0.999
ENSG00000162396	CGmito(495)	CG	3.52749	0.586123	0.534225		CG	0.586123	-		1:CG	2:DG	+	0.039	*0.961
ENSG00000165678	CGmito(495)	CG	1.74187	0.504945	0.683305		CG	0.504945	-		1:CG	2:DG	+	0.001	*0.999
ENSG00000176410	CGmito(495)	CG	1.24906	0.519932	0.654058		CG	0.519932	-		1:CG	2:DG	+	0.001	*0.999
ENSG00000185608	CGmito(495)	CG	1.28046	0.518213	0.65737		CG	0.518213	-		1:CG	2:DG	+	0.001	*0.999
ENSG00000196683	CGmito(495)	CG	1.16119	0.559196	0.581255		CG	0.559196	-		1:CG	2:DG	+	0.001	*0.999
ENSG00000005022	CGmito(495)	CG	2.01771	0.611896	0.491193		CG	0.611896	-	1	1:CG	1:CG		*0.916	0.084
ENSG00000051341	CGmito(495)	CG	2.12604	0.564024	0.572659		CG	0.564024	-	1	1:CG	1:CG		*0.649	0.351
ENSG00000059691	CGmito(495)	CG	2.69398	0.553837	0.590886		CG	0.553837	-	1	1:CG	1:CG		*0.916	0.084
ENSG00000061794	CGmito(495)	CG	2.54663	0.685022	0.378304		CG	0.685022	-	1	1:CG	1:CG		*0.916	0.084
ENSG00000065518	CGmito(495)	CG	5.33335	0.522325	0.649465		CG	0.522325	-	1	1:CG	1:CG		*0.916	0.084
ENSG00000069345	CGmito(495)	CG	2.13064	0.547704	0.60202		CG	0.547704	-	1	1:CG	1:CG		*0.649	0.351
ENSG00000073905	CGmito(495)	CG	1.09297	0.507432	0.678393		CG	0.507432	-	1	1:CG	1:CG		*0.649	0.351
ENSG00000074071	CGmito(495)	CG	2.44669	0.679807	0.385946		CG	0.679807	-	1	1:CG	1:CG		*0.916	0.084
ENSG00000078668	CGmito(495)	CG	1.31767	0.503358	0.686454		CG	0.503358	-	1	1:CG	1:CG		*0.649	0.351
ENSG00000086504	CGmito(495)	CG	1.66215	0.670491	0.399744		CG	0.670491	-	1	1:CG	1:CG		*0.916	0.084
ENSG00000090266	CGmito(495)	CG	6.86635	0.558539	0.582431		CG	0.558539	-	1	1:CG	1:CG		*0.66	0.34
ENSG00000101290	CGmito(495)	CG	1.00831	0.536812	0.622107		CG	0.536812	-	1	1:CG	1:CG		*0.649	0.351
ENSG00000102738	CGmito(495)	CG	1.49539	0.661033	0.413952		CG	0.661033	-	1	1:CG	1:CG		*0.916	0.084
ENSG00000102763	CGmito(495)	CG	0.689541	0.51276	0.667948		CG	0.51276	-	1	1:CG	1:CG		*0.649	0.351
ENSG00000103423	CGmito(495)	CG	1.10712	0.545844	0.605421		CG	0.545844	-	1	1:CG	1:CG		*0.649	0.351
ENSG00000104969	CGmito(495)	CG	0.956441	0.503951	0.685276		CG	0.503951	-	1	1:CG	1:CG		*0.649	0.351
ENSG00000108179	CGmito(495)	CG	0.648889	0.590801	0.526276		CG	0.590801	-	1	1:CG	1:CG		*0.916	0.084
ENSG00000108561	CGmito(495)	CG	1.81406	0.523242	0.647711		CG	0.523242	-	1	1:CG	1:CG		*0.916	0.084
ENSG00000109519	CGmito(495)	CG	10.9926	0.680106	0.385507		CG	0.680106	-	1	1:CG	1:CG		*0.916	0.084
ENSG00000112992	CGmito(495)	CG	2.89594	0.519448	0.654989		CG	0.519448	-	1	1:CG	1:CG		*0.66	0.34
ENSG00000113013	CGmito(495)	CG	5.78141	0.608094	0.497425		CG	0.608094	-	1	1:CG	1:CG		*0.916	0.084
ENSG00000113048	CGmito(495)	CG	2.18577	0.689232	0.372177		CG	0.689232	-	1	1:CG	1:CG		*0.916	0.084
ENSG00000119421	CGmito(495)	CG	5.76331	0.567107	0.567208		CG	0.567107	-	1	1:CG	1:CG		*0.66	0.34
ENSG00000123009	CGmito(495)	CG	0.258833	0.586934	0.532843		CG	0.586934	-	1	1:CG	1:CG		*0.916	0.084
ENSG00000125656	CGmito(495)	CG	1.96296	0.523421	0.647369		CG	0.523421	-	1	1:CG	1:CG		*0.916	0.084
ENSG00000130348	CGmito(495)	CG	2.94561	0.591735	0.524697		CG	0.591735	-	1	1:CG	1:CG		*0.916	0.084
ENSG00000132313	CGmito(495)	CG	2.63356	0.688524	0.373205		CG	0.688524	-	1	1:CG	1:CG		*0.916	0.084
ENSG00000132676	CGmito(495)	CG	1.01031	0.605243	0.502125		CG	0.605243	-	1	1:CG	1:CG		*0.916	0.084
ENSG00000134905	CGmito(495)	CG	2.46547	0.634126	0.455508		CG	0.634126	-	1	1:CG	1:CG		*0.916	0.084
ENSG00000137513	CGmito(495)	CG	4.53986	0.618387	0.480641		CG	0.618387	-	1	1:CG	1:CG		*0.916	0.084
ENSG00000139131	CGmito(495)	CG	3.32327	0.59335	0.52197		CG	0.59335	-	1	1:CG	1:CG		*0.916	0.084
ENSG00000143374	CGmito(495)	CG	2.94246	0.577441	0.549148		CG	0.577441	-	1	1:CG	1:CG		*0.916	0.084
ENSG00000147684	CGmito(495)	CG	1.40785	0.517164	0.659396		CG	0.517164	-	1	1:CG	1:CG		*0.66	0.34
ENSG00000154719	CGmito(495)	CG	1.56508	0.651021	0.429214		CG	0.651021	-	1	1:CG	1:CG		*0.916	0.084
ENSG00000164405	CGmito(495)	CG	0.892065	0.529446	0.635923		CG	0.529446	-	1	1:CG	1:CG		*0.916	0.084
ENSG00000165264	CGmito(495)	CG	5.72556	0.572566	0.557628		CG	0.572566	-	1	1:CG	1:CG		*0.66	0.34
ENSG00000165637	CGmito(495)	CG	0.699456	0.504582	0.684024		CG	0.504582	-	1	1:CG	1:CG		*0.649	0.351
ENSG00000165688	CGmito(495)	CG	1.67	0.533553	0.628197		CG	0.533553	-	1	1:CG	1:CG		*0.916	0.084
ENSG00000168653	CGmito(495)	CG	6.06972	0.550895	0.596211		CG	0.550895	-	1	1:CG	1:CG		*0.66	0.34
ENSG00000169100	CGmito(495)	CG	1.96503	0.589846	0.527894		CG	0.589846	-	1	1:CG	1:CG		*0.916	0.084
ENSG00000173726	CGmito(495)	CG	1.23734	0.542317	0.611905		CG	0.542317	-	1	1:CG	1:CG		*0.916	0.084
ENSG00000179091	CGmito(495)	CG	3.23488	0.560322	0.579243		CG	0.560322	-	1	1:CG	1:CG		*0.916	0.084
ENSG00000183648	CGmito(495)	CG	2.58872	0.506634	0.679967		CG	0.506634	-	1	1:CG	1:CG		*0.66	0.34
ENSG00000189043	CGmito(495)	CG	6.5855	0.565468	0.570102		CG	0.565468	-	1	1:CG	1:CG		*0.66	0.34
ENSG00000004455	CGmito(495)	CG	14.3593	0.621515	0.475596		CG	0.621515	-		1:CG	1:CG		*0.916	0.084
ENSG00000007376	CGmito(495)	CG	4.23689	0.746353	0.292556		CG	0.746353	-		1:CG	1:CG		*0.649	0.351
ENSG00000011376	CGmito(495)	CG	2.31213	0.603087	0.505694		CG	0.603087	-		1:CG	1:CG		*0.916	0.084
ENSG00000031698	CGmito(495)	CG	32.6723	0.923114	0.0800026		CG	0.923114	-		1:CG	1:CG		*0.916	0.084
ENSG00000043514	CGmito(495)	CG	1.90945	0.677395	0.389501		CG	0.677395	-		1:CG	1:CG		*0.649	0.351
ENSG00000048544	CGmito(495)	CG	6.92503	0.821683	0.196401		CG	0.821683	-		1:CG	1:CG		*0.916	0.084
ENSG00000050748	CGmito(495)	CG	6.84976	0.628597	0.464264		CG	0.628597	-		1:CG	1:CG		*0.916	0.084
ENSG00000065427	CGmito(495)	CG	73.5937	0.933963	0.0683185		CG	0.933963	-		1:CG	1:CG		*0.916	0.084
ENSG00000067704	CGmito(495)	CG	0.660755	0.605592	0.501549		CG	0.605592	-		1:CG	1:CG		*0.916	0.084
ENSG00000072756	CGmito(495)	CG	5.06365	0.776139	0.253423		CG	0.776139	-		1:CG	1:CG		*0.649	0.351
ENSG00000077713	CGmito(495)	CG	5.50121	0.805486	0.216309		CG	0.805486	-		1:CG	1:CG		*0.916	0.084
ENSG00000078061	CGmito(495)	CG	12.2575	0.588833	0.529613		CG	0.588833	-		1:CG	1:CG		*0.916	0.084
ENSG00000082515	CGmito(495)	CG	7.08888	0.829578	0.186838		CG	0.829578	-		1:CG	1:CG		*0.916	0.084
ENSG00000084774	CGmito(495)	CG	15.4855	0.507733	0.677799		CG	0.507733	-		1:CG	1:CG		*0.916	0.084
ENSG00000085760	CGmito(495)	CG	3.40383	0.675439	0.392392		CG	0.675439	-		1:CG	1:CG		*0.916	0.084
ENSG00000086189	CGmito(495)	CG	6.86779	0.729324	0.315637		CG	0.729324	-		1:CG	1:CG		*0.916	0.084
ENSG00000088205	CGmito(495)	CG	33.647	0.887963	0.118825		CG	0.887963	-		1:CG	1:CG		*0.916	0.084
ENSG00000089127	CGmito(495)	CG	3.2793	0.67684	0.390321		CG	0.67684	-		1:CG	1:CG		*0.649	0.351
ENSG00000090861	CGmito(495)	CG	29.1506	0.895828	0.110007		CG	0.895828	-		1:CG	1:CG		*0.916	0.084
ENSG00000096080	CGmito(495)	CG	7.19214	0.828563	0.188063		CG	0.828563	-		1:CG	1:CG		*0.916	0.084
ENSG00000099821	CGmito(495)	CG	5.34673	0.593883	0.521072		CG	0.593883	-		1:CG	1:CG		*0.649	0.351
ENSG00000100316	CGmito(495)	CG	12.7973	0.90768	0.0968633		CG	0.90768	-		1:CG	1:CG		*0.916	0.084
ENSG00000103200	CGmito(495)	CG	4.27927	0.551903	0.594382		CG	0.551903	-		1:CG	1:CG		*0.916	0.084
ENSG00000104517	CGmito(495)	CG	5.42376	0.669428	0.401332		CG	0.669428	-		1:CG	1:CG		*0.916	0.084
ENSG00000104907	CGmito(495)	CG	6.7917	0.796768	0.227191		CG	0.796768	-		1:CG	1:CG		*0.916	0.084
ENSG00000105193	CGmito(495)	CG	7.27317	0.850596	0.161818		CG	0.850596	-		1:CG	1:CG		*0.916	0.084
ENSG00000105364	CGmito(495)	CG	6.42376	0.823859	0.193756		CG	0.823859	-		1:CG	1:CG		*0.916	0.084
ENSG00000106028	CGmito(495)	CG	11.2255	0.606849	0.499475		CG	0.606849	-		1:CG	1:CG		*0.916	0.084
ENSG00000108064	CGmito(495)	CG	115.789	0.526358	0.641773		CG	0.526358	-		1:CG	1:CG		*0.649	0.351
ENSG00000108826	CGmito(495)	CG	5.98003	0.818773	0.199949		CG	0.818773	-		1:CG	1:CG		*0.916	0.084
ENSG00000110700	CGmito(495)	CG	7.00111	0.853988	0.157838		CG	0.853988	-		1:CG	1:CG		*0.916	0.084
ENSG00000110955	CGmito(495)	CG	3.31197	0.534896	0.625683		CG	0.534896	-		1:CG	1:CG		*0.916	0.084
ENSG00000111335	CGmito(495)	CG	3.48539	0.735129	0.307709		CG	0.735129	-		1:CG	1:CG		*0.649	0.351
ENSG00000112096	CGmito(495)	CG	2.99064	0.501389	0.690372		CG	0.501389	-		1:CG	1:CG		*0.649	0.351
ENSG00000112110	CGmito(495)	CG	7.13298	0.828751	0.187835		CG	0.828751	-		1:CG	1:CG		*0.916	0.084
ENSG00000112651	CGmito(495)	CG	5.65717	0.836637	0.178365		CG	0.836637	-		1:CG	1:CG		*0.916	0.084
ENSG00000112855	CGmito(495)	CG	0.658254	0.642039	0.443106		CG	0.642039	-		1:CG	1:CG		*0.916	0.084
ENSG00000112996	CGmito(495)	CG	7.30971	0.826869	0.190109		CG	0.826869	-		1:CG	1:CG		*0.916	0.084
ENSG00000113407	CGmito(495)	CG	12.7801	0.744868	0.294549		CG	0.744868	-		1:CG	1:CG		*0.916	0.084
ENSG00000114686	CGmito(495)	CG	8.44925	0.888638	0.118065		CG	0.888638	-		1:CG	1:CG		*0.916	0.084
ENSG00000115364	CGmito(495)	CG	7.22586	0.831289	0.184778		CG	0.831289	-		1:CG	1:CG		*0.916	0.084
ENSG00000115484	CGmito(495)	CG	10.9439	0.679965	0.385713		CG	0.679965	-		1:CG	1:CG		*0.916	0.084
ENSG00000115541	CGmito(495)	CG	7.88065	0.635903	0.452709		CG	0.635903	-		1:CG	1:CG		*0.916	0.084
ENSG00000115866	CGmito(495)	CG	18.3056	0.755149	0.28084		CG	0.755149	-		1:CG	1:CG		*0.916	0.084
ENSG00000116459	CGmito(495)	CG	11.2997	0.576247	0.551218		CG	0.576247	-		1:CG	1:CG		*0.916	0.084
ENSG00000116898	CGmito(495)	CG	7.31664	0.832545	0.183269		CG	0.832545	-		1:CG	1:CG		*0.916	0.084
ENSG00000119013	CGmito(495)	CG	6.66844	0.504358	0.68447		CG	0.504358	-		1:CG	1:CG		*0.916	0.084
ENSG00000120333	CGmito(495)	CG	5.65769	0.811056	0.209418		CG	0.811056	-		1:CG	1:CG		*0.916	0.084
ENSG00000120438	CGmito(495)	CG	21.7192	0.773158	0.257271		CG	0.773158	-		1:CG	1:CG		*0.916	0.084
ENSG00000121057	CGmito(495)	CG	5.81259	0.778738	0.250081		CG	0.778738	-		1:CG	1:CG		*0.649	0.351
ENSG00000122140	CGmito(495)	CG	5.59699	0.823578	0.194097		CG	0.823578	-		1:CG	1:CG		*0.916	0.084
ENSG00000124172	CGmito(495)	CG	2.10846	0.505551	0.682106		CG	0.505551	-		1:CG	1:CG		*0.916	0.084
ENSG00000125445	CGmito(495)	CG	7.13506	0.828964	0.187579		CG	0.828964	-		1:CG	1:CG		*0.916	0.084
ENSG00000125691	CGmito(495)	CG	6.76869	0.862426	0.148006		CG	0.862426	-		1:CG	1:CG		*0.916	0.084
ENSG00000126602	CGmito(495)	CG	20.6845	0.641005	0.444719		CG	0.641005	-		1:CG	1:CG		*0.916	0.084
ENSG00000127989	CGmito(495)	CG	38.3255	0.634353	0.45515		CG	0.634353	-		1:CG	1:CG		*0.649	0.351
ENSG00000128626	CGmito(495)	CG	7.20375	0.864793	0.145265		CG	0.864793	-		1:CG	1:CG		*0.916	0.084
ENSG00000128951	CGmito(495)	CG	9.1697	0.563616	0.573382		CG	0.563616	-		1:CG	1:CG		*0.916	0.084
ENSG00000129282	CGmito(495)	CG	5.15587	0.76401	0.269174		CG	0.76401	-		1:CG	1:CG		*0.649	0.351
ENSG00000130288	CGmito(495)	CG	2.99406	0.735996	0.30653		CG	0.735996	-		1:CG	1:CG		*0.916	0.084
ENSG00000130312	CGmito(495)	CG	7.169	0.829692	0.186701		CG	0.829692	-		1:CG	1:CG		*0.916	0.084
ENSG00000130414	CGmito(495)	CG	8.50254	0.598936	0.5126		CG	0.598936	-		1:CG	1:CG		*0.916	0.084
ENSG00000131100	CGmito(495)	CG	5.166	0.518984	0.655882		CG	0.518984	-		1:CG	1:CG		*0.916	0.084
ENSG00000131368	CGmito(495)	CG	5.65769	0.811056	0.209418		CG	0.811056	-		1:CG	1:CG		*0.916	0.084
ENSG00000131586	CGmito(495)	CG	10.5076	0.905249	0.099545		CG	0.905249	-		1:CG	1:CG		*0.916	0.084
ENSG00000132361	CGmito(495)	CG	5.24594	0.591885	0.524444		CG	0.591885	-		1:CG	1:CG		*0.916	0.084
ENSG00000132591	CGmito(495)	CG	5.14515	0.778176	0.250803		CG	0.778176	-		1:CG	1:CG		*0.649	0.351
ENSG00000134056	CGmito(495)	CG	5.65769	0.811056	0.209418		CG	0.811056	-		1:CG	1:CG		*0.916	0.084
ENSG00000134440	CGmito(495)	CG	14.5095	0.743601	0.29625		CG	0.743601	-		1:CG	1:CG		*0.916	0.084
ENSG00000135624	CGmito(495)	CG	11.6257	0.643914	0.44019		CG	0.643914	-		1:CG	1:CG		*0.916	0.084
ENSG00000135900	CGmito(495)	CG	4.50891	0.743851	0.295915		CG	0.743851	-		1:CG	1:CG		*0.649	0.351
ENSG00000135972	CGmito(495)	CG	5.74556	0.807606	0.21368		CG	0.807606	-		1:CG	1:CG		*0.916	0.084
ENSG00000136522	CGmito(495)	CG	5.65769	0.811056	0.209418		CG	0.811056	-		1:CG	1:CG		*0.916	0.084
ENSG00000136628	CGmito(495)	CG	4.81463	0.659948	0.415595		CG	0.659948	-		1:CG	1:CG		*0.916	0.084
ENSG00000136758	CGmito(495)	CG	3.72198	0.673756	0.394887		CG	0.673756	-		1:CG	1:CG		*0.916	0.084
ENSG00000137330	CGmito(495)	CG	6.05082	0.830782	0.185388		CG	0.830782	-		1:CG	1:CG		*0.916	0.084
ENSG00000137547	CGmito(495)	CG	6.15447	0.823642	0.19402		CG	0.823642	-		1:CG	1:CG		*0.916	0.084
ENSG00000137944	CGmito(495)	CG	5.39364	0.69927	0.357718		CG	0.69927	-		1:CG	1:CG		*0.649	0.351
ENSG00000138035	CGmito(495)	CG	8.97521	0.785217	0.241795		CG	0.785217	-		1:CG	1:CG		*0.649	0.351
ENSG00000138396	CGmito(495)	CG	5.58533	0.810353	0.210285		CG	0.810353	-		1:CG	1:CG		*0.916	0.084
ENSG00000138777	CGmito(495)	CG	1.23663	0.633117	0.4571		CG	0.633117	-		1:CG	1:CG		*0.916	0.084
ENSG00000140009	CGmito(495)	CG	65.7507	0.55342	0.591639		CG	0.55342	-		1:CG	1:CG		*0.649	0.351
ENSG00000140105	CGmito(495)	CG	1.45786	0.630046	0.461962		CG	0.630046	-		1:CG	1:CG		*0.916	0.084
ENSG00000140740	CGmito(495)	CG	9.68395	0.542422	0.611711		CG	0.542422	-		1:CG	1:CG		*0.916	0.084
ENSG00000140990	CGmito(495)	CG	2.28497	0.629119	0.463435		CG	0.629119	-		1:CG	1:CG		*0.916	0.084
ENSG00000141385	CGmito(495)	CG	6.88143	0.626009	0.46839		CG	0.626009	-		1:CG	1:CG		*0.916	0.084
ENSG00000142676	CGmito(495)	CG	15.0546	0.92713	0.0756611		CG	0.92713	-		1:CG	1:CG		*0.916	0.084
ENSG00000143314	CGmito(495)	CG	6.69874	0.818939	0.199745		CG	0.818939	-		1:CG	1:CG		*0.916	0.084
ENSG00000143436	CGmito(495)	CG	6.98075	0.821857	0.196189		CG	0.821857	-		1:CG	1:CG		*0.916	0.084
ENSG00000144029	CGmito(495)	CG	5.65769	0.811056	0.209418		CG	0.811056	-		1:CG	1:CG		*0.916	0.084
ENSG00000145982	CGmito(495)	CG	15.8287	0.899442	0.10598		CG	0.899442	-		1:CG	1:CG		*0.916	0.084
ENSG00000146731	CGmito(495)	CG	7.34583	0.635756	0.452941		CG	0.635756	-		1:CG	1:CG		*0.916	0.084
ENSG00000147586	CGmito(495)	CG	5.01782	0.845939	0.167308		CG	0.845939	-		1:CG	1:CG		*0.916	0.084
ENSG00000149792	CGmito(495)	CG	7.11271	0.874459	0.13415		CG	0.874459	-		1:CG	1:CG		*0.916	0.084
ENSG00000152234	CGmito(495)	CG	10.4475	0.57526	0.552934		CG	0.57526	-		1:CG	1:CG		*0.916	0.084
ENSG00000154518	CGmito(495)	CG	6.46406	0.53993	0.616315		CG	0.53993	-		1:CG	1:CG		*0.916	0.084
ENSG00000154723	CGmito(495)	CG	5.36637	0.524283	0.645724		CG	0.524283	-		1:CG	1:CG		*0.916	0.084
ENSG00000154999	CGmito(495)	CG	6.08592	0.832975	0.182751		CG	0.832975	-		1:CG	1:CG		*0.916	0.084
ENSG00000156502	CGmito(495)	CG	15.7332	0.82318	0.19458		CG	0.82318	-		1:CG	1:CG		*0.916	0.084
ENSG00000156990	CGmito(495)	CG	4.18779	0.739316	0.30203		CG	0.739316	-		1:CG	1:CG		*0.649	0.351
ENSG00000158042	CGmito(495)	CG	7.01439	0.836816	0.178151		CG	0.836816	-		1:CG	1:CG		*0.916	0.084
ENSG00000158417	CGmito(495)	CG	5.55012	0.671267	0.398588		CG	0.671267	-		1:CG	1:CG		*0.916	0.084
ENSG00000159186	CGmito(495)	CG	6.10547	0.562618	0.575154		CG	0.562618	-		1:CG	1:CG		*0.916	0.084
ENSG00000159199	CGmito(495)	CG	5.47846	0.501148	0.690855		CG	0.501148	-		1:CG	1:CG		*0.916	0.084
ENSG00000160194	CGmito(495)	CG	1.47064	0.530843	0.633289		CG	0.530843	-		1:CG	1:CG		*0.66	0.34
ENSG00000160916	CGmito(495)	CG	3.26136	0.56123	0.577624		CG	0.56123	-		1:CG	1:CG		*0.916	0.084
ENSG00000161016	CGmito(495)	CG	17.3983	0.921163	0.0821177		CG	0.921163	-		1:CG	1:CG		*0.916	0.084
ENSG00000162368	CGmito(495)	CG	0.740789	0.573928	0.555251		CG	0.573928	-		1:CG	1:CG		*0.916	0.084
ENSG00000162872	CGmito(495)	CG	5.81279	0.810611	0.209967		CG	0.810611	-		1:CG	1:CG		*0.916	0.084
ENSG00000163319	CGmito(495)	CG	5.65769	0.811056	0.209418		CG	0.811056	-		1:CG	1:CG		*0.916	0.084
ENSG00000163468	CGmito(495)	CG	26.4827	0.745921	0.293136		CG	0.745921	-		1:CG	1:CG		*0.916	0.084
ENSG00000163797	CGmito(495)	CG	6.2456	0.818509	0.200271		CG	0.818509	-		1:CG	1:CG		*0.916	0.084
ENSG00000164163	CGmito(495)	CG	9.07523	0.634417	0.455049		CG	0.634417	-		1:CG	1:CG		*0.916	0.084
ENSG00000164587	CGmito(495)	CG	7.12225	0.848046	0.16482		CG	0.848046	-		1:CG	1:CG		*0.916	0.084
ENSG00000164896	CGmito(495)	CG	3.92209	0.609134	0.495717		CG	0.609134	-		1:CG	1:CG		*0.916	0.084
ENSG00000165526	CGmito(495)	CG	4.23689	0.746353	0.292556		CG	0.746353	-		1:CG	1:CG		*0.649	0.351
ENSG00000165629	CGmito(495)	CG	5.37493	0.546271	0.60464		CG	0.546271	-		1:CG	1:CG		*0.916	0.084
ENSG00000166133	CGmito(495)	CG	5.72693	0.776461	0.253008		CG	0.776461	-		1:CG	1:CG		*0.916	0.084
ENSG00000166226	CGmito(495)	CG	12.3556	0.671698	0.397946		CG	0.671698	-		1:CG	1:CG		*0.916	0.084
ENSG00000166855	CGmito(495)	CG	5.57151	0.644118	0.439874		CG	0.644118	-		1:CG	1:CG		*0.916	0.084
ENSG00000166902	CGmito(495)	CG	7.09661	0.827868	0.188902		CG	0.827868	-		1:CG	1:CG		*0.916	0.084
ENSG00000167283	CGmito(495)	CG	4.23761	0.591002	0.525936		CG	0.591002	-		1:CG	1:CG		*0.916	0.084
ENSG00000167862	CGmito(495)	CG	9.46969	0.67369	0.394985		CG	0.67369	-		1:CG	1:CG		*0.916	0.084
ENSG00000167863	CGmito(495)	CG	5.32076	0.504495	0.684197		CG	0.504495	-		1:CG	1:CG		*0.916	0.084
ENSG00000168028	CGmito(495)	CG	6.83026	0.837472	0.177368		CG	0.837472	-		1:CG	1:CG		*0.916	0.084
ENSG00000169020	CGmito(495)	CG	3.32538	0.525462	0.643477		CG	0.525462	-		1:CG	1:CG		*0.916	0.084
ENSG00000169288	CGmito(495)	CG	5.54978	0.84012	0.17421		CG	0.84012	-		1:CG	1:CG		*0.916	0.084
ENSG00000169718	CGmito(495)	CG	3.50906	0.78521	0.241804		CG	0.78521	-		1:CG	1:CG		*0.916	0.084
ENSG00000171421	CGmito(495)	CG	5.91273	0.813653	0.206221		CG	0.813653	-		1:CG	1:CG		*0.916	0.084
ENSG00000171674	CGmito(495)	CG	5.65769	0.811056	0.209418		CG	0.811056	-		1:CG	1:CG		*0.916	0.084
ENSG00000171861	CGmito(495)	CG	5.21385	0.775953	0.253664		CG	0.775953	-		1:CG	1:CG		*0.649	0.351
ENSG00000172172	CGmito(495)	CG	6.87761	0.837212	0.177678		CG	0.837212	-		1:CG	1:CG		*0.916	0.084
ENSG00000173658	CGmito(495)	CG	5.54978	0.84012	0.17421		CG	0.84012	-		1:CG	1:CG		*0.916	0.084
ENSG00000173863	CGmito(495)	CG	5.65769	0.811056	0.209418		CG	0.811056	-		1:CG	1:CG		*0.916	0.084
ENSG00000174100	CGmito(495)	CG	5.53818	0.809321	0.21156		CG	0.809321	-		1:CG	1:CG		*0.916	0.084
ENSG00000174547	CGmito(495)	CG	7.28533	0.854736	0.156962		CG	0.854736	-		1:CG	1:CG		*0.916	0.084
ENSG00000175581	CGmito(495)	CG	6.88934	0.823807	0.193819		CG	0.823807	-		1:CG	1:CG		*0.916	0.084
ENSG00000178741	CGmito(495)	CG	11.7601	0.515479	0.662659		CG	0.515479	-		1:CG	1:CG		*0.916	0.084
ENSG00000179115	CGmito(495)	CG	7.80615	0.593971	0.520925		CG	0.593971	-		1:CG	1:CG		*0.916	0.084
ENSG00000180353	CGmito(495)	CG	123.585	0.542064	0.612372		CG	0.542064	-		1:CG	1:CG		*0.649	0.351
ENSG00000180817	CGmito(495)	CG	2.19507	0.552328	0.593613		CG	0.552328	-		1:CG	1:CG		*0.916	0.084
ENSG00000180992	CGmito(495)	CG	5.65769	0.811056	0.209418		CG	0.811056	-		1:CG	1:CG		*0.916	0.084
ENSG00000181991	CGmito(495)	CG	6.45134	0.832571	0.183237		CG	0.832571	-		1:CG	1:CG		*0.916	0.084
ENSG00000182382	CGmito(495)	CG	5.81279	0.810611	0.209967		CG	0.810611	-		1:CG	1:CG		*0.916	0.084
ENSG00000182810	CGmito(495)	CG	5.558	0.79596	0.228207		CG	0.79596	-		1:CG	1:CG		*0.916	0.084
ENSG00000183010	CGmito(495)	CG	22.14	0.630897	0.460613		CG	0.630897	-		1:CG	1:CG		*0.916	0.084
ENSG00000183093	CGmito(495)	CG	14.027	0.932247	0.0701574		CG	0.932247	-		1:CG	1:CG		*0.916	0.084
ENSG00000185414	CGmito(495)	CG	5.57037	0.812151	0.208069		CG	0.812151	-		1:CG	1:CG		*0.916	0.084
ENSG00000185834	CGmito(495)	CG	5.65769	0.811056	0.209418		CG	0.811056	-		1:CG	1:CG		*0.916	0.084
ENSG00000186381	CGmito(495)	CG	1.47064	0.530843	0.633289		CG	0.530843	-		1:CG	1:CG		*0.66	0.34
ENSG00000186468	CGmito(495)	CG	7.16252	0.826281	0.190821		CG	0.826281	-		1:CG	1:CG		*0.916	0.084
ENSG00000187042	CGmito(495)	CG	5.17404	0.806961	0.21448		CG	0.806961	-		1:CG	1:CG		*0.916	0.084
ENSG00000188226	CGmito(495)	CG	5.65769	0.811056	0.209418		CG	0.811056	-		1:CG	1:CG		*0.916	0.084
ENSG00000196262	CGmito(495)	CG	3.53491	0.675709	0.391993		CG	0.675709	-		1:CG	1:CG		*0.916	0.084
ENSG00000196305	CGmito(495)	CG	7.67698	0.708684	0.344346		CG	0.708684	-		1:CG	1:CG		*0.916	0.084
ENSG00000196365	CGmito(495)	CG	4.54551	0.619515	0.478818		CG	0.619515	-		1:CG	1:CG		*0.916	0.084
ENSG00000196722	CGmito(495)	CG	5.81279	0.810611	0.209967		CG	0.810611	-		1:CG	1:CG		*0.916	0.084
ENSG00000197009	CGmito(495)	CG	5.65769	0.811056	0.209418		CG	0.811056	-		1:CG	1:CG		*0.916	0.084
ENSG00000197345	CGmito(495)	CG	5.54978	0.84012	0.17421		CG	0.84012	-		1:CG	1:CG		*0.916	0.084
ENSG00000197442	CGmito(495)	CG	9.60202	0.611947	0.491109		CG	0.611947	-		1:CG	1:CG		*0.649	0.351
ENSG00000197883	CGmito(495)	CG	1.47064	0.530843	0.633289		CG	0.530843	-		1:CG	1:CG		*0.66	0.34
ENSG00000197958	CGmito(495)	CG	15.1492	0.92245	0.0807219		CG	0.92245	-		1:CG	1:CG		*0.916	0.084
ENSG00000198015	CGmito(495)	CG	6.60257	0.827424	0.189438		CG	0.827424	-		1:CG	1:CG		*0.916	0.084
ENSG00000198827	CGmito(495)	CG	5.65769	0.811056	0.209418		CG	0.811056	-		1:CG	1:CG		*0.916	0.084
ENSG00000014919	DGmito(162)	DG	2.70189	0.460365	0.775735	*	CG	0.539635	-	1	2:DG	1:CG	+	*0.66	0.34
ENSG00000115286	DGmito(162)	DG	7.77745	0.433237	0.836471	*	CG	0.566763	-	1	2:DG	1:CG	+	*0.66	0.34
ENSG00000116288	DGmito(162)	DG	3.82375	0.416423	0.876053	*	CG	0.583577	-	1	2:DG	1:CG	+	*0.916	0.084
ENSG00000140374	DGmito(162)	DG	3.65804	0.457069	0.78292	*	CG	0.542931	-	1	2:DG	1:CG	+	*0.916	0.084
ENSG00000177192	DGmito(162)	DG	2.84162	0.414322	0.881113	*	CG	0.585678	-	1	2:DG	1:CG	+	*0.649	0.351
ENSG00000197912	DGmito(162)	DG	7.46595	0.447	0.805196	*	CG	0.553	-	1	2:DG	1:CG	+	*0.649	0.351
ENSG00000074582	DGmito(162)	DG	6.2006	0.417921	0.872463	*	CG	0.582079	-		2:DG	1:CG	+	*0.916	0.084
ENSG00000110536	DGmito(162)	DG	9.03806	0.458478	0.779843	*	CG	0.541522	-		2:DG	1:CG	+	*0.916	0.084
ENSG00000114956	DGmito(162)	DG	10.9181	0.391248	0.938413	*	CG	0.608752	-		2:DG	1:CG	+	*0.916	0.084
ENSG00000135828	DGmito(162)	DG	16.1971	0.150139	1.89619	*	CG	0.849861	-		2:DG	1:CG	+	*0.649	0.351
ENSG00000136480	DGmito(162)	DG	9.28268	0.33698	1.08773	*	CG	0.66302	-		2:DG	1:CG	+	*0.916	0.084
ENSG00000138095	DGmito(162)	DG	11.7232	0.262204	1.33863	*	CG	0.737796	-		2:DG	1:CG	+	*0.916	0.084
ENSG00000140521	DGmito(162)	DG	4.53728	0.469825	0.755394	*	CG	0.530175	-		2:DG	1:CG	+	*0.649	0.351
ENSG00000144381	DGmito(162)	DG	17.695	0.275684	1.2885	*	CG	0.724316	-		2:DG	1:CG	+	*0.916	0.084
ENSG00000145494	DGmito(162)	DG	8.00279	0.480282	0.733381	*	CG	0.519718	-		2:DG	1:CG	+	*0.916	0.084
ENSG00000148090	DGmito(162)	DG	3.34993	0.374139	0.983127	*	CG	0.625861	-		2:DG	1:CG	+	*0.649	0.351
ENSG00000156467	DGmito(162)	DG	8.61948	0.485907	0.721738	*	CG	0.514093	-		2:DG	1:CG	+	*0.916	0.084
ENSG00000158828	DGmito(162)	DG	8.50028	0.400723	0.914485	*	CG	0.599277	-		2:DG	1:CG	+	*0.649	0.351
ENSG00000164258	DGmito(162)	DG	8.14714	0.493365	0.706506	*	CG	0.506635	-		2:DG	1:CG	+	*0.916	0.084
ENSG00000167085	DGmito(162)	DG	3.40219	0.471246	0.752375	*	CG	0.528754	-		2:DG	1:CG	+	*0.649	0.351
ENSG00000167792	DGmito(162)	DG	21.2143	0.427373	0.850097	*	CG	0.572627	-		2:DG	1:CG	+	*0.916	0.084
ENSG00000178127	DGmito(162)	DG	15.231	0.451657	0.794833	*	CG	0.548343	-		2:DG	1:CG	+	*0.916	0.084
ENSG00000182180	DGmito(162)	DG	12.4428	0.116028	2.15392	*	CG	0.883972	-		2:DG	1:CG	+	*0.916	0.084
ENSG00000054523	DGmito(162)	DG	1.94997	0.49031	0.712717	*	CG	0.50969	-	1	2:DG	2:DG		0.247	*0.753
ENSG00000087088	DGmito(162)	DG	1.47387	0.490665	0.711994	*	CG	0.509335	-	1	2:DG	2:DG		0.001	*0.999
ENSG00000104936	DGmito(162)	DG	4.10052	0.46613	0.76329	*	CG	0.53387	-	1	2:DG	2:DG		0.247	*0.753
ENSG00000126953	DGmito(162)	DG	2.43536	0.466574	0.762339	*	CG	0.533426	-	1	2:DG	2:DG		0.001	*0.999
ENSG00000131269	DGmito(162)	DG	1.23611	0.477235	0.739746	*	CG	0.522765	-	1	2:DG	2:DG		0.001	*0.999
ENSG00000175193	DGmito(162)	DG	0.9346	0.491222	0.710858	*	CG	0.508778	-	1	2:DG	2:DG		0.001	*0.999
ENSG00000175567	DGmito(162)	DG	1.69878	0.471131	0.75262	*	CG	0.528869	-	1	2:DG	2:DG		0.001	*0.999
ENSG00000198836	DGmito(162)	DG	2.02288	0.473481	0.747643	*	CG	0.526519	-	1	2:DG	2:DG		0.007	*0.993
ENSG00000159267	DGmito(162)	DG	1.63064	0.498425	0.696302	*	CG	0.501575	-		2:DG	2:DG		0.001	*0.999
ENSG00000051523	DGmito(162)	DG	0.0572372	0.566485	0.568305		DG	0.566485	-	1	2:DG	1:CG	+	*0.916	0.084
ENSG00000068366	DGmito(162)	DG	1.3202	0.529451	0.635916		DG	0.529451	-	1	2:DG	1:CG	+	*0.916	0.084
ENSG00000073578	DGmito(162)	DG	1.81332	0.632669	0.457808		DG	0.632669	-	1	2:DG	1:CG	+	*0.66	0.34
ENSG00000075239	DGmito(162)	DG	1.49787	0.653039	0.426119		DG	0.653039	-	1	2:DG	1:CG	+	*0.916	0.084
ENSG00000076248	DGmito(162)	DG	1.27773	0.572136	0.558379		DG	0.572136	-	1	2:DG	1:CG	+	*0.649	0.351
ENSG00000078070	DGmito(162)	DG	0.500202	0.601148	0.508915		DG	0.601148	-	1	2:DG	1:CG	+	*0.916	0.084
ENSG00000080819	DGmito(162)	DG	5.81267	0.771042	0.260012		DG	0.771042	-	1	2:DG	1:CG	+	*0.66	0.34
ENSG00000083123	DGmito(162)	DG	3.65364	0.702312	0.353378		DG	0.702312	-	1	2:DG	1:CG	+	*0.916	0.084
ENSG00000084754	DGmito(162)	DG	6.12439	0.734499	0.308566		DG	0.734499	-	1	2:DG	1:CG	+	*0.916	0.084
ENSG00000100243	DGmito(162)	DG	1.32051	0.675157	0.39281		DG	0.675157	-	1	2:DG	1:CG	+	*0.916	0.084
ENSG00000100889	DGmito(162)	DG	4.43615	0.681075	0.384083		DG	0.681075	-	1	2:DG	1:CG	+	*0.916	0.084
ENSG00000105379	DGmito(162)	DG	1.32892	0.521845	0.650385		DG	0.521845	-	1	2:DG	1:CG	+	*0.66	0.34
ENSG00000105607	DGmito(162)	DG	3.84886	0.734699	0.308295		DG	0.734699	-	1	2:DG	1:CG	+	*0.66	0.34
ENSG00000111275	DGmito(162)	DG	1.39073	0.586773	0.533117		DG	0.586773	-	1	2:DG	1:CG	+	*0.66	0.34
ENSG00000114054	DGmito(162)	DG	1.85868	0.605581	0.501567		DG	0.605581	-	1	2:DG	1:CG	+	*0.916	0.084
ENSG00000115159	DGmito(162)	DG	1.80619	0.669522	0.401192		DG	0.669522	-	1	2:DG	1:CG	+	*0.66	0.34
ENSG00000117054	DGmito(162)	DG	3.14379	0.705457	0.34891		DG	0.705457	-	1	2:DG	1:CG	+	*0.66	0.34
ENSG00000119711	DGmito(162)	DG	0.944509	0.646837	0.435662		DG	0.646837	-	1	2:DG	1:CG	+	*0.66	0.34
ENSG00000124275	DGmito(162)	DG	0.759569	0.618356	0.480692		DG	0.618356	-	1	2:DG	1:CG	+	*0.916	0.084
ENSG00000125779	DGmito(162)	DG	3.50957	0.501534	0.690084		DG	0.501534	-	1	2:DG	1:CG	+	*0.649	0.351
ENSG00000131844	DGmito(162)	DG	0.881789	0.597883	0.514361		DG	0.597883	-	1	2:DG	1:CG	+	*0.916	0.084
ENSG00000136143	DGmito(162)	DG	1.86653	0.63823	0.449056		DG	0.63823	-	1	2:DG	1:CG	+	*0.916	0.084
ENSG00000138029	DGmito(162)	DG	8.78987	0.769199	0.262406		DG	0.769199	-	1	2:DG	1:CG	+	*0.916	0.084
ENSG00000138796	DGmito(162)	DG	3.71168	0.708817	0.344158		DG	0.708817	-	1	2:DG	1:CG	+	*0.916	0.084
ENSG00000142046	DGmito(162)	DG	2.52465	0.679821	0.385925		DG	0.679821	-	1	2:DG	1:CG	+	*0.66	0.34
ENSG00000143252	DGmito(162)	DG	3.86277	0.714241	0.336534		DG	0.714241	-	1	2:DG	1:CG	+	*0.916	0.084
ENSG00000148290	DGmito(162)	DG	6.60848	0.515517	0.662585		DG	0.515517	-	1	2:DG	1:CG	+	*0.66	0.34
ENSG00000148672	DGmito(162)	DG	4.74044	0.698435	0.358913		DG	0.698435	-	1	2:DG	1:CG	+	*0.66	0.34
ENSG00000150768	DGmito(162)	DG	1.90975	0.666443	0.405801		DG	0.666443	-	1	2:DG	1:CG	+	*0.916	0.084
ENSG00000159423	DGmito(162)	DG	1.21206	0.665673	0.406957		DG	0.665673	-	1	2:DG	1:CG	+	*0.66	0.34
ENSG00000165060	DGmito(162)	DG	1.84066	0.503385	0.686399		DG	0.503385	-	1	2:DG	1:CG	+	*0.916	0.084
ENSG00000166347	DGmito(162)	DG	3.11834	0.661902	0.412639		DG	0.661902	-	1	2:DG	1:CG	+	*0.66	0.34
ENSG00000171503	DGmito(162)	DG	0.710342	0.649733	0.431194		DG	0.649733	-	1	2:DG	1:CG	+	*0.66	0.34
ENSG00000173599	DGmito(162)	DG	0.449808	0.611369	0.492054		DG	0.611369	-	1	2:DG	1:CG	+	*0.916	0.084
ENSG00000023228	DGmito(162)	DG	9.78749	0.518501	0.656813		DG	0.518501	-		2:DG	1:CG	+	*0.916	0.084
ENSG00000072506	DGmito(162)	DG	3.41067	0.587561	0.531775		DG	0.587561	-		2:DG	1:CG	+	*0.916	0.084
ENSG00000082212	DGmito(162)	DG	6.71975	0.621456	0.475691		DG	0.621456	-		2:DG	1:CG	+	*0.916	0.084
ENSG00000091140	DGmito(162)	DG	13.4506	0.585739	0.534881		DG	0.585739	-		2:DG	1:CG	+	*0.916	0.084
ENSG00000100714	DGmito(162)	DG	32.21	0.74626	0.292681		DG	0.74626	-		2:DG	1:CG	+	*0.916	0.084
ENSG00000105953	DGmito(162)	DG	8.14024	0.749087	0.2889		DG	0.749087	-		2:DG	1:CG	+	*0.916	0.084
ENSG00000110717	DGmito(162)	DG	7.1372	0.604927	0.502648		DG	0.604927	-		2:DG	1:CG	+	*0.916	0.084
ENSG00000117118	DGmito(162)	DG	5.67836	0.685718	0.377288		DG	0.685718	-		2:DG	1:CG	+	*0.916	0.084
ENSG00000131828	DGmito(162)	DG	4.52005	0.665371	0.40741		DG	0.665371	-		2:DG	1:CG	+	*0.916	0.084
ENSG00000141510	DGmito(162)	DG	130.586	0.596004	0.517508		DG	0.596004	-		2:DG	1:CG	+	*0.916	0.084
ENSG00000142168	DGmito(162)	DG	10.565	0.633537	0.456437		DG	0.633537	-		2:DG	1:CG	+	*0.916	0.084
ENSG00000158864	DGmito(162)	DG	8.62033	0.563715	0.573206		DG	0.563715	-		2:DG	1:CG	+	*0.916	0.084
ENSG00000168291	DGmito(162)	DG	7.96668	0.669415	0.401351		DG	0.669415	-		2:DG	1:CG	+	*0.916	0.084
ENSG00000008311	DGmito(162)	DG	0.427114	0.571955	0.558695		DG	0.571955	-	1	2:DG	2:DG		0.001	*0.999
ENSG00000021826	DGmito(162)	DG	0.337312	0.563097	0.574304		DG	0.563097	-	1	2:DG	2:DG		0.001	*0.999
ENSG00000025708	DGmito(162)	DG	0.907894	0.587085	0.532586		DG	0.587085	-	1	2:DG	2:DG		0.001	*0.999
ENSG00000036473	DGmito(162)	DG	0.590367	0.604557	0.503259		DG	0.604557	-	1	2:DG	2:DG		0.001	*0.999
ENSG00000059573	DGmito(162)	DG	0.307628	0.543636	0.609476		DG	0.543636	-	1	2:DG	2:DG		0.001	*0.999
ENSG00000064012	DGmito(162)	DG	1.03753	0.553582	0.591346		DG	0.553582	-	1	2:DG	2:DG		0.001	*0.999
ENSG00000065154	DGmito(162)	DG	0.305234	0.583719	0.538336		DG	0.583719	-	1	2:DG	2:DG		0.001	*0.999
ENSG00000066926	DGmito(162)	DG	0.47265	0.587613	0.531687		DG	0.587613	-	1	2:DG	2:DG		0.001	*0.999
ENSG00000072778	DGmito(162)	DG	0.366781	0.587897	0.531204		DG	0.587897	-	1	2:DG	2:DG		0.001	*0.999
ENSG00000083720	DGmito(162)	DG	0.369297	0.583237	0.539162		DG	0.583237	-	1	2:DG	2:DG		0.007	*0.993
ENSG00000091483	DGmito(162)	DG	0.164488	0.581144	0.542757		DG	0.581144	-	1	2:DG	2:DG		0.007	*0.993
ENSG00000100033	DGmito(162)	DG	0.957934	0.625439	0.469302		DG	0.625439	-	1	2:DG	2:DG		0.001	*0.999
ENSG00000101986	DGmito(162)	DG	1.05556	0.524774	0.644788		DG	0.524774	-	1	2:DG	2:DG		0.001	*0.999
ENSG00000102743	DGmito(162)	DG	0.340934	0.545327	0.60637		DG	0.545327	-	1	2:DG	2:DG		0.001	*0.999
ENSG00000106633	DGmito(162)	DG	3.97637	0.639899	0.446444		DG	0.639899	-	1	2:DG	2:DG		0.001	*0.999
ENSG00000109501	DGmito(162)	DG	2.5819	0.500481	0.692185		DG	0.500481	-	1	2:DG	2:DG		0.007	*0.993
ENSG00000110090	DGmito(162)	DG	0.267766	0.565184	0.570604		DG	0.565184	-	1	2:DG	2:DG		0.001	*0.999
ENSG00000110435	DGmito(162)	DG	0.16476	0.582758	0.539983		DG	0.582758	-	1	2:DG	2:DG		0.007	*0.993
ENSG00000112294	DGmito(162)	DG	1.17496	0.651214	0.428918		DG	0.651214	-	1	2:DG	2:DG		0.001	*0.999
ENSG00000114026	DGmito(162)	DG	1.06206	0.584253	0.53742		DG	0.584253	-	1	2:DG	2:DG		0.001	*0.999
ENSG00000115317	DGmito(162)	DG	0.877511	0.505968	0.681281		DG	0.505968	-	1	2:DG	2:DG		0.001	*0.999
ENSG00000115361	DGmito(162)	DG	0.741411	0.633623	0.456302		DG	0.633623	-	1	2:DG	2:DG		0.007	*0.993
ENSG00000119689	DGmito(162)	DG	0.539371	0.559846	0.580094		DG	0.559846	-	1	2:DG	2:DG		0.007	*0.993
ENSG00000122971	DGmito(162)	DG	0.498787	0.586731	0.533189		DG	0.586731	-	1	2:DG	2:DG		0.001	*0.999
ENSG00000123191	DGmito(162)	DG	1.27537	0.59155	0.525009		DG	0.59155	-	1	2:DG	2:DG		0.001	*0.999
ENSG00000128928	DGmito(162)	DG	0.491915	0.575935	0.551761		DG	0.575935	-	1	2:DG	2:DG		0.001	*0.999
ENSG00000132837	DGmito(162)	DG	1.62098	0.631567	0.459551		DG	0.631567	-	1	2:DG	2:DG		0.001	*0.999
ENSG00000134240	DGmito(162)	DG	0.923847	0.592896	0.522736		DG	0.592896	-	1	2:DG	2:DG		0.007	*0.993
ENSG00000139531	DGmito(162)	DG	2.75865	0.667645	0.403999		DG	0.667645	-	1	2:DG	2:DG		0.007	*0.993
ENSG00000140459	DGmito(162)	DG	0.974934	0.626213	0.468064		DG	0.626213	-	1	2:DG	2:DG		0.001	*0.999
ENSG00000140905	DGmito(162)	DG	1.52876	0.625982	0.468434		DG	0.625982	-	1	2:DG	2:DG		0.001	*0.999
ENSG00000143224	DGmito(162)	DG	0.599073	0.580784	0.543376		DG	0.580784	-	1	2:DG	2:DG		0.001	*0.999
ENSG00000145020	DGmito(162)	DG	0.317896	0.596877	0.516045		DG	0.596877	-	1	2:DG	2:DG		0.001	*0.999
ENSG00000147465	DGmito(162)	DG	1.64275	0.591822	0.52455		DG	0.591822	-	1	2:DG	2:DG		0.001	*0.999
ENSG00000156515	DGmito(162)	DG	4.20648	0.656588	0.420698		DG	0.656588	-	1	2:DG	2:DG		0.247	*0.753
ENSG00000157184	DGmito(162)	DG	0.495789	0.573245	0.556442		DG	0.573245	-	1	2:DG	2:DG		0.001	*0.999
ENSG00000158578	DGmito(162)	DG	0.34924	0.585139	0.535906		DG	0.585139	-	1	2:DG	2:DG		0.001	*0.999
ENSG00000160882	DGmito(162)	DG	1.37707	0.60867	0.49648		DG	0.60867	-	1	2:DG	2:DG		0.001	*0.999
ENSG00000161653	DGmito(162)	DG	0.388915	0.579326	0.54589		DG	0.579326	-	1	2:DG	2:DG		0.001	*0.999
ENSG00000164398	DGmito(162)	DG	0.380656	0.557182	0.584863		DG	0.557182	-	1	2:DG	2:DG		0.001	*0.999
ENSG00000165168	DGmito(162)	DG	0.374952	0.618892	0.479824		DG	0.618892	-	1	2:DG	2:DG		0.001	*0.999
ENSG00000171766	DGmito(162)	DG	0.425402	0.562854	0.574734		DG	0.562854	-	1	2:DG	2:DG		0.001	*0.999
ENSG00000171791	DGmito(162)	DG	3.81544	0.50703	0.679185		DG	0.50703	-	1	2:DG	2:DG		0.001	*0.999
ENSG00000175198	DGmito(162)	DG	0.399612	0.566897	0.567578		DG	0.566897	-	1	2:DG	2:DG		0.001	*0.999
ENSG00000177542	DGmito(162)	DG	0.620833	0.529894	0.635077		DG	0.529894	-	1	2:DG	2:DG		0.001	*0.999
ENSG00000179142	DGmito(162)	DG	1.71875	0.614155	0.487509		DG	0.614155	-	1	2:DG	2:DG		0.001	*0.999
ENSG00000188603	DGmito(162)	DG	1.33896	0.5096	0.674128		DG	0.5096	-	1	2:DG	2:DG		0.001	*0.999
ENSG00000188690	DGmito(162)	DG	0.269413	0.633033	0.457233		DG	0.633033	-	1	2:DG	2:DG		0.007	*0.993
ENSG00000189221	DGmito(162)	DG	1.86152	0.606909	0.499377		DG	0.606909	-	1	2:DG	2:DG		0.001	*0.999
ENSG00000196177	DGmito(162)	DG	0.404673	0.590357	0.527027		DG	0.590357	-	1	2:DG	2:DG		0.001	*0.999
ENSG00000198650	DGmito(162)	DG	1.98056	0.628744	0.464031		DG	0.628744	-	1	2:DG	2:DG		0.001	*0.999
ENSG00000203859	DGmito(162)	DG	2.1746	0.600255	0.5104		DG	0.600255	-	1	2:DG	2:DG		0.001	*0.999
ENSG00000004864	DGmito(162)	DG	1.49449	0.51607	0.661513		DG	0.51607	-		2:DG	2:DG		0.001	*0.999
ENSG00000006695	DGmito(162)	DG	1.00298	0.574264	0.554666		DG	0.574264	-		2:DG	2:DG		0.001	*0.999
ENSG00000021574	DGmito(162)	DG	1.41321	0.544294	0.608266		DG	0.544294	-		2:DG	2:DG		0.001	*0.999
ENSG00000102125	DGmito(162)	DG	1.38201	0.512519	0.668417		DG	0.512519	-		2:DG	2:DG		0.001	*0.999
ENSG00000103150	DGmito(162)	DG	0.850868	0.543332	0.610034		DG	0.543332	-		2:DG	2:DG		0.001	*0.999
ENSG00000104381	DGmito(162)	DG	1.43766	0.512824	0.667823		DG	0.512824	-		2:DG	2:DG		0.001	*0.999
ENSG00000105755	DGmito(162)	DG	1.49449	0.51607	0.661513		DG	0.51607	-		2:DG	2:DG		0.001	*0.999
ENSG00000107815	DGmito(162)	DG	1.46288	0.512878	0.667718		DG	0.512878	-		2:DG	2:DG		0.001	*0.999
ENSG00000109424	DGmito(162)	DG	1.3969	0.514648	0.664273		DG	0.514648	-		2:DG	2:DG		0.001	*0.999
ENSG00000115204	DGmito(162)	DG	1.12672	0.529079	0.636618		DG	0.529079	-		2:DG	2:DG		0.001	*0.999
ENSG00000116688	DGmito(162)	DG	1.307	0.513401	0.666698		DG	0.513401	-		2:DG	2:DG		0.001	*0.999
ENSG00000117305	DGmito(162)	DG	0.610986	0.583779	0.538233		DG	0.583779	-		2:DG	2:DG		0.001	*0.999
ENSG00000117479	DGmito(162)	DG	1.18285	0.52694	0.640668		DG	0.52694	-		2:DG	2:DG		0.001	*0.999
ENSG00000125454	DGmito(162)	DG	1.31725	0.516875	0.659955		DG	0.516875	-		2:DG	2:DG		0.001	*0.999
ENSG00000130489	DGmito(162)	DG	1.66452	0.5101	0.673148		DG	0.5101	-		2:DG	2:DG		0.001	*0.999
ENSG00000133028	DGmito(162)	DG	1.3969	0.514648	0.664273		DG	0.514648	-		2:DG	2:DG		0.001	*0.999
ENSG00000135929	DGmito(162)	DG	1.36447	0.508261	0.67676		DG	0.508261	-		2:DG	2:DG		0.001	*0.999
ENSG00000137992	DGmito(162)	DG	0.92815	0.528836	0.637077		DG	0.528836	-		2:DG	2:DG		0.001	*0.999
ENSG00000146085	DGmito(162)	DG	1.03261	0.547704	0.602021		DG	0.547704	-		2:DG	2:DG		0.001	*0.999
ENSG00000151729	DGmito(162)	DG	1.33789	0.501376	0.690399		DG	0.501376	-		2:DG	2:DG		0.001	*0.999
ENSG00000166548	DGmito(162)	DG	1.11502	0.525805	0.642824		DG	0.525805	-		2:DG	2:DG		0.001	*0.999
ENSG00000168827	DGmito(162)	DG	1.12545	0.508513	0.676265		DG	0.508513	-		2:DG	2:DG		0.001	*0.999
ENSG00000171953	DGmito(162)	DG	1.38084	0.514274	0.664999		DG	0.514274	-		2:DG	2:DG		0.001	*0.999
ENSG00000172482	DGmito(162)	DG	1.27993	0.514941	0.663703		DG	0.514941	-		2:DG	2:DG		0.001	*0.999
ENSG00000175564	DGmito(162)	DG	1.3969	0.514648	0.664273		DG	0.514648	-		2:DG	2:DG		0.001	*0.999
ENSG00000182712	DGmito(162)	DG	1.42747	0.513923	0.665683		DG	0.513923	-		2:DG	2:DG		0.001	*0.999
ENSG00000183044	DGmito(162)	DG	0.83109	0.569852	0.562379		DG	0.569852	-		2:DG	2:DG		0.001	*0.999
ENSG00000186153	DGmito(162)	DG	0.748474	0.55822	0.583002		DG	0.55822	-		2:DG	2:DG		0.001	*0.999
ENSG00000188906	DGmito(162)	DG	17.8702	0.540636	0.615009		DG	0.540636	-		2:DG	2:DG		0.247	*0.753
ENSG00000197386	DGmito(162)	DG	1.29911	0.545733	0.605625		DG	0.545733	-		2:DG	2:DG		0.001	*0.999
ENSG00000198814	DGmito(162)	DG	1.34234	0.513775	0.665971		DG	0.513775	-		2:DG	2:DG		0.001	*0.999
ENSG00000004961	DGmito-predict(38)	CG	1.25929	0.458404	0.780005	*	DG	0.541596	-		1:CG	2:DG	+	0.001	*0.999
ENSG00000072210	DGmito-predict(38)	CG	1.84553	0.418001	0.872272	*	DG	0.581999	-		1:CG	2:DG	+	0.001	*0.999
ENSG00000074803	DGmito-predict(38)	CG	4.93005	0.402493	0.910077	*	DG	0.597507	-		1:CG	2:DG	+	0.247	*0.753
ENSG00000104325	DGmito-predict(38)	CG	1.03119	0.404019	0.906294	*	DG	0.595981	-		1:CG	2:DG	+	0.007	*0.993
ENSG00000113971	DGmito-predict(38)	CG	0.983466	0.421367	0.86425	*	DG	0.578633	-		1:CG	2:DG	+	0.001	*0.999
ENSG00000116171	DGmito-predict(38)	CG	0.96617	0.481267	0.731333	*	DG	0.518733	-		1:CG	2:DG	+	0.001	*0.999
ENSG00000124370	DGmito-predict(38)	CG	1.47867	0.461578	0.773105	*	DG	0.538422	-		1:CG	2:DG	+	0.001	*0.999
ENSG00000124615	DGmito-predict(38)	CG	1.54061	0.426026	0.853256	*	DG	0.573974	-		1:CG	2:DG	+	0.001	*0.999
ENSG00000130299	DGmito-predict(38)	CG	1.20187	0.478254	0.737613	*	DG	0.521746	-		1:CG	2:DG	+	0.001	*0.999
ENSG00000130707	DGmito-predict(38)	CG	1.1647	0.439555	0.821993	*	DG	0.560445	-		1:CG	2:DG	+	0.001	*0.999
ENSG00000143575	DGmito-predict(38)	CG	1.424	0.471556	0.751716	*	DG	0.528444	-		1:CG	2:DG	+	0.001	*0.999
ENSG00000161270	DGmito-predict(38)	CG	1.01005	0.432845	0.837374	*	DG	0.567155	-		1:CG	2:DG	+	0.001	*0.999
ENSG00000163541	DGmito-predict(38)	CG	0.81938	0.424341	0.857218	*	DG	0.575659	-		1:CG	2:DG	+	0.007	*0.993
ENSG00000173085	DGmito-predict(38)	CG	1.72072	0.492756	0.707741	*	DG	0.507244	-		1:CG	2:DG	+	0.001	*0.999
ENSG00000180902	DGmito-predict(38)	CG	1.30844	0.487526	0.718411	*	DG	0.512474	-		1:CG	2:DG	+	0.001	*0.999
ENSG00000117528	DGmito-predict(38)	CG	0.762249	0.497766	0.697625	*	DG	0.502234	-		1:CG	1:CG		*0.649	0.351
ENSG00000121691	DGmito-predict(38)	CG	6.31719	0.255988	1.36263	*	DG	0.744012	-		1:CG	1:CG		*0.66	0.34
ENSG00000125356	DGmito-predict(38)	CG	6.52058	0.443849	0.812272	*	DG	0.556151	-		1:CG	1:CG		*0.916	0.084
ENSG00000131979	DGmito-predict(38)	CG	7.00612	0.302342	1.1962	*	DG	0.697658	-		1:CG	1:CG		*0.66	0.34
ENSG00000132142	DGmito-predict(38)	CG	2.47145	0.480729	0.732451	*	DG	0.519271	-		1:CG	1:CG		*0.916	0.084
ENSG00000132155	DGmito-predict(38)	CG	15.552	0.459132	0.778417	*	DG	0.540868	-		1:CG	1:CG		*0.649	0.351
ENSG00000132781	DGmito-predict(38)	CG	3.4464	0.382876	0.960044	*	DG	0.617124	-		1:CG	1:CG		*0.649	0.351
ENSG00000133835	DGmito-predict(38)	CG	6.39963	0.288493	1.24308	*	DG	0.711507	-		1:CG	1:CG		*0.66	0.34
ENSG00000134333	DGmito-predict(38)	CG	10.6578	0.264313	1.33062	*	DG	0.735687	-		1:CG	1:CG		*0.916	0.084
ENSG00000139287	DGmito-predict(38)	CG	5.89493	0.279473	1.27485	*	DG	0.720527	-		1:CG	1:CG		*0.66	0.34
ENSG00000151552	DGmito-predict(38)	CG	4.70998	0.310892	1.16831	*	DG	0.689108	-		1:CG	1:CG		*0.916	0.084
ENSG00000063854	DGmito-predict(38)	CG	1.31417	0.504537	0.684113		CG	0.504537	-		1:CG	2:DG	+	0.001	*0.999
ENSG00000012048	DGmito-predict(38)	CG	61.099	0.696609	0.361531		CG	0.696609	-		1:CG	1:CG		*0.916	0.084
ENSG00000075415	DGmito-predict(38)	CG	3.00179	0.586465	0.533643		CG	0.586465	-		1:CG	1:CG		*0.916	0.084
ENSG00000100357	DGmito-predict(38)	CG	1.29502	0.584832	0.536431		CG	0.584832	-		1:CG	1:CG		*0.916	0.084
ENSG00000104687	DGmito-predict(38)	CG	5.49283	0.581702	0.541797		CG	0.581702	-		1:CG	1:CG		*0.916	0.084
ENSG00000106105	DGmito-predict(38)	CG	13.3814	0.699012	0.358087		CG	0.699012	-		1:CG	1:CG		*0.916	0.084
ENSG00000123297	DGmito-predict(38)	CG	1.87835	0.626078	0.46828		CG	0.626078	-		1:CG	1:CG		*0.649	0.351
ENSG00000130595	DGmito-predict(38)	CG	8.00714	0.889516	0.117078		CG	0.889516	-		1:CG	1:CG		*0.916	0.084
ENSG00000137806	DGmito-predict(38)	CG	2.06049	0.537846	0.620183		CG	0.537846	-		1:CG	1:CG		*0.66	0.34
ENSG00000138363	DGmito-predict(38)	CG	6.13898	0.520843	0.652307		CG	0.520843	-		1:CG	1:CG		*0.916	0.084
ENSG00000150753	DGmito-predict(38)	CG	24.0243	0.776631	0.25279		CG	0.776631	-		1:CG	1:CG		*0.916	0.084
ENSG00000178952	DGmito-predict(38)	CG	9.76676	0.7402	0.300835		CG	0.7402	-		1:CG	1:CG		*0.916	0.084
